# Supplementary material for: Changes in soil properties and the phoD-harboring bacteria of the alfalfa field in response to phosphite treatment
Source: Frontiers journal article supplement (doi:10.3389/fmicb.2022.1013896), 2022-11-29
Supplement: Data_Sheet_1.zip [file Data_Sheet_1.zip]

## Sheet: OTUs
Supplementary Table 3 Operational taxonomic units were transformed to reach the same sequencing depth level
ID	Taxonomy	CK1	CK2	CK3	CKK1	CKK2	CKK3	Pi301	Pi302	Pi303	Phi301	Phi302	Phi303	Pi601	Pi602	Pi603	Phi601	Phi602	Phi603	Pi901	Pi902	Pi903	Phi901	Phi902	Phi903	Pi1201	Pi1202	Pi1203	Phi1201	Phi1202	Phi120
OTU_1	d__Bacteria; p__Proteobacteria; c__Gammaproteobacteria; o__Xanthomonadales; f__Xanthomonadaceae; g__unclassified; s__unclassified	932	172	858	733	347	705	857	164	1044	366	460	793	321	886	3186	228	477	1903	1072	916	1606	1381	2772	861	851	505	224	894	485	1171
OTU_10	Unassigned	149	98	565	203	53	308	169	78	404	193	158	358	64	851	573	78	115	941	602	130	685	664	651	412	763	111	278	740	51	477
OTU_100	d__Bacteria; p__Actinobacteria; c__Rubrobacteria; o__Rubrobacterales; f__Rubrobacteraceae; g__unclassified; s__unclassified	38	100	8	4	149	51	59	186	0	156	79	13	11	0	0	44	86	0	1	0	0	0	0	0	3	11	15	5	65	4
OTU_1000	d__Bacteria; p__Planctomycetes; c__unclassified; o__unclassified; f__unclassified; g__unclassified; s__unclassified	0	0	0	0	0	0	0	0	0	0	0	0	0	1	8	0	0	0	1	0	4	1	0	0	0	0	0	0	0	0
OTU_10001	Unassigned	0	0	1	0	0	0	0	0	0	0	0	0	3	0	0	0	0	0	0	0	0	0	0	0	0	0	0	0	0	0
OTU_10002	Unassigned	0	0	0	0	0	0	0	0	0	0	0	0	2	0	0	0	0	0	0	0	0	0	0	0	0	0	0	0	0	0
OTU_10005	d__Bacteria; p__Proteobacteria; c__Alphaproteobacteria; o__Rhizobiales; f__Bradyrhizobiaceae; g__unclassified; s__unclassified	0	0	0	0	0	0	0	0	0	0	0	0	3	0	0	0	0	0	0	0	0	0	0	1	0	0	0	0	0	0
OTU_10007	d__Bacteria; p__unclassified; c__unclassified; o__unclassified; f__unclassified; g__unclassified; s__unclassified	0	0	0	0	0	0	0	0	0	0	0	0	3	0	0	0	0	0	0	0	0	0	0	0	0	0	0	0	0	0
OTU_10008	d__Bacteria; p__unclassified; c__unclassified; o__unclassified; f__unclassified; g__unclassified; s__unclassified	0	0	0	0	0	0	0	0	0	0	0	0	2	0	0	0	0	0	0	0	0	0	0	0	0	0	0	0	0	0
OTU_10009	d__Bacteria; p__unclassified; c__unclassified; o__unclassified; f__unclassified; g__unclassified; s__unclassified	0	0	0	0	0	0	0	0	0	0	0	0	3	0	0	0	0	0	0	0	0	0	0	0	0	0	0	0	0	0
OTU_1001	Unassigned	0	3	3	3	0	6	0	3	0	5	8	2	0	3	1	6	4	3	4	0	0	0	1	1	0	9	13	12	2	2
OTU_10012	Unassigned	0	1	0	0	0	0	0	0	0	0	0	0	2	0	0	3	0	0	0	0	0	0	0	0	0	0	0	0	0	0
OTU_10013	d__Bacteria; p__Proteobacteria; c__Gammaproteobacteria; o__Xanthomonadales; f__Xanthomonadaceae; g__unclassified; s__unclassified	0	0	0	0	0	0	0	0	0	0	0	0	3	0	0	0	0	0	0	0	0	0	0	0	0	0	0	0	0	0
OTU_10016	Unassigned	0	0	1	0	0	0	0	0	0	0	0	0	2	0	0	0	0	0	0	0	0	0	0	0	0	0	0	0	0	0
OTU_10019	d__Bacteria; p__Actinobacteria; c__unclassified; o__unclassified; f__unclassified; g__unclassified; s__unclassified	0	0	0	0	0	0	0	0	0	0	0	0	3	0	0	0	0	0	0	0	0	0	0	0	0	0	0	0	0	0
OTU_1002	d__Bacteria; p__Actinobacteria; c__unclassified; o__Streptomycetales; f__Streptomycetaceae; g__unclassified; s__unclassified	0	0	0	0	0	0	0	0	0	0	0	0	3	0	0	7	1	0	0	7	0	0	0	0	0	1	1	0	0	15
OTU_10021	d__Bacteria; p__Actinobacteria; c__unclassified; o__Pseudonocardiales; f__Pseudonocardiaceae; g__unclassified; s__unclassified	0	1	0	0	0	0	0	1	0	0	0	1	2	0	0	0	0	1	0	0	0	0	0	0	0	0	0	1	0	0
OTU_10022	d__Bacteria; p__Actinobacteria; c__unclassified; o__Streptomycetales; f__Streptomycetaceae; g__unclassified; s__unclassified	0	0	0	0	0	0	0	0	0	0	0	0	3	0	0	0	0	0	0	0	0	0	0	0	0	0	0	0	0	0
OTU_10027	Unassigned	0	0	0	0	0	0	0	0	0	0	1	0	4	0	0	0	0	0	0	0	0	0	0	0	0	1	1	0	1	0
OTU_10028	d__Bacteria; p__Proteobacteria; c__Gammaproteobacteria; o__Pseudomonadales; f__Pseudomonadaceae; g__unclassified; s__unclassified	0	0	0	0	0	0	0	0	0	0	0	0	4	0	0	0	0	1	0	0	0	0	0	0	0	0	0	0	0	0
OTU_10029	d__Bacteria; p__Proteobacteria; c__Alphaproteobacteria; o__Rhodospirillales; f__Acetobacteraceae; g__unclassified; s__unclassified	0	0	0	0	0	0	0	0	0	0	0	0	3	0	0	0	0	0	0	0	0	0	0	0	0	0	0	0	0	0
OTU_1003	d__Bacteria; p__Cyanobacteria; c__Gloeobacteria; o__Gloeobacterales; f__Gloeobacteraceae; g__unclassified; s__unclassified	0	0	1	0	0	0	6	0	0	0	0	0	0	0	2	1	3	0	0	1	10	1	2	6	0	0	3	0	0	5
OTU_10031	d__Bacteria; p__Planctomycetes; c__Planctomycetia; o__Planctomycetales; f__Isosphaeraceae; g__unclassified; s__unclassified	0	1	0	0	0	0	0	0	0	0	0	0	3	0	0	0	0	0	0	0	0	0	0	0	0	0	0	0	0	0
OTU_10035	Unassigned	0	0	0	0	1	0	0	0	0	0	0	0	0	1	0	0	0	0	1	0	1	0	0	0	0	0	0	1	0	0
OTU_10037	d__Bacteria; p__Proteobacteria; c__Alphaproteobacteria; o__Rhizobiales; f__unclassified; g__unclassified; s__unclassified	0	0	0	0	0	0	0	0	0	0	1	0	0	3	0	0	0	0	0	0	0	0	0	0	0	0	0	0	0	0
OTU_1004	d__Bacteria; p__Proteobacteria; c__Gammaproteobacteria; o__Xanthomonadales; f__Xanthomonadaceae; g__unclassified; s__unclassified	7	8	31	8	9	6	11	6	13	9	22	30	27	3	10	7	5	0	10	6	11	12	2	14	3	7	24	12	9	11
OTU_10041	Unassigned	0	0	0	0	0	0	0	0	0	0	0	0	0	1	0	0	0	0	0	0	0	0	0	0	0	0	0	0	0	0
OTU_10042	d__Bacteria; p__Firmicutes; c__Bacilli; o__Bacillales; f__Bacillaceae; g__unclassified; s__unclassified	0	0	0	0	0	0	0	0	0	0	0	0	0	3	0	0	0	0	0	0	0	0	0	0	0	0	0	0	0	0
OTU_10043	d__Bacteria; p__Planctomycetes; c__Planctomycetia; o__Planctomycetales; f__Gemmataceae; g__unclassified; s__unclassified	0	0	0	0	0	0	0	0	0	0	0	0	0	2	0	0	0	0	0	0	0	0	0	0	0	0	0	0	0	0
OTU_10045	d__Bacteria; p__Proteobacteria; c__Gammaproteobacteria; o__Xanthomonadales; f__Xanthomonadaceae; g__unclassified; s__unclassified	0	0	0	0	0	0	0	1	0	0	1	0	0	2	0	2	1	0	0	0	0	0	0	0	0	0	0	0	0	0
OTU_10048	d__Bacteria; p__Proteobacteria; c__Alphaproteobacteria; o__Rhodobacterales; f__Rhodobacteraceae; g__unclassified; s__unclassified	0	0	0	0	0	0	0	0	0	0	0	0	0	3	0	0	0	0	0	0	0	0	0	0	0	0	0	0	0	0
OTU_1005	d__Bacteria; p__Planctomycetes; c__Planctomycetia; o__Planctomycetales; f__unclassified; g__unclassified; s__unclassified	6	6	9	0	0	1	0	0	7	0	2	13	13	0	0	1	4	0	0	9	2	0	1	3	0	1	0	0	0	0
OTU_10050	d__Bacteria; p__Proteobacteria; c__Alphaproteobacteria; o__Rhodospirillales; f__Acetobacteraceae; g__unclassified; s__unclassified	0	0	0	0	0	0	0	0	0	0	0	0	0	4	1	0	0	0	0	0	0	0	0	0	0	0	0	0	0	0
OTU_10055	Unassigned	0	0	0	0	0	0	0	0	0	0	0	1	1	1	0	0	0	0	0	0	0	0	0	0	0	0	0	0	0	0
OTU_10056	Unassigned	0	0	0	0	0	0	0	0	0	0	0	0	0	1	0	0	0	0	0	0	0	0	0	0	0	0	0	0	0	0
OTU_10057	Unassigned	0	0	0	0	0	0	0	0	0	0	0	0	0	3	0	0	0	0	0	0	0	0	0	0	0	0	0	0	0	0
OTU_10058	Unassigned	0	0	0	0	1	0	0	0	0	2	1	0	0	1	0	0	0	0	0	0	0	1	0	0	1	0	0	0	0	0
OTU_1006	Unassigned	0	0	0	0	0	0	0	0	0	0	0	0	0	3	0	0	0	1	0	0	0	0	0	0	0	0	0	0	0	0
OTU_10060	d__Bacteria; p__Proteobacteria; c__Alphaproteobacteria; o__Rhodospirillales; f__Acetobacteraceae; g__unclassified; s__unclassified	0	0	0	0	0	0	0	0	0	0	0	0	0	1	2	0	0	0	0	0	0	0	0	0	0	0	0	0	0	0
OTU_10061	d__Bacteria; p__Proteobacteria; c__Gammaproteobacteria; o__Pseudomonadales; f__Pseudomonadaceae; g__unclassified; s__unclassified	0	0	0	0	0	0	0	0	0	0	0	0	0	3	0	0	0	0	0	0	0	0	0	0	0	0	0	0	0	0
OTU_10065	d__Bacteria; p__Proteobacteria; c__Alphaproteobacteria; o__Rhodospirillales; f__Acetobacteraceae; g__unclassified; s__unclassified	0	0	0	0	0	0	0	0	0	0	0	0	0	2	0	0	0	0	0	0	0	0	0	0	0	0	0	0	0	0
OTU_10067	Unassigned	0	0	0	0	0	0	0	0	0	0	0	0	0	2	0	0	0	0	0	0	0	0	0	0	0	0	0	0	0	0
OTU_10068	d__Bacteria; p__Actinobacteria; c__unclassified; o__unclassified; f__unclassified; g__unclassified; s__unclassified	0	0	0	0	0	0	0	0	0	0	0	0	0	2	0	0	0	0	0	0	0	0	0	0	0	0	0	2	0	0
OTU_10069	d__Bacteria; p__Planctomycetes; c__Planctomycetia; o__Planctomycetales; f__unclassified; g__unclassified; s__unclassified	0	0	0	0	0	0	0	0	0	0	0	2	0	1	1	0	1	1	0	0	2	0	1	0	0	0	0	1	0	0
OTU_1007	d__Bacteria; p__Actinobacteria; c__unclassified; o__Streptomycetales; f__Streptomycetaceae; g__unclassified; s__unclassified	0	0	0	0	2	0	0	0	0	0	0	0	0	2	10	0	0	0	7	0	0	0	4	0	1	0	1	0	0	2
OTU_10070	d__Bacteria; p__Proteobacteria; c__Alphaproteobacteria; o__Rhizobiales; f__Bradyrhizobiaceae; g__Bradyrhizobium; s__unclassified	0	0	0	0	0	0	0	0	0	0	0	0	0	2	0	0	0	0	0	0	0	0	0	0	0	0	0	0	2	0
OTU_10076	d__Bacteria; p__Actinobacteria; c__unclassified; o__unclassified; f__unclassified; g__unclassified; s__unclassified	0	0	0	0	0	0	0	0	0	0	0	0	0	2	0	0	0	0	0	0	0	0	0	0	0	0	0	0	0	0
OTU_1008	d__Bacteria; p__Actinobacteria; c__Rubrobacteria; o__Rubrobacterales; f__Rubrobacteraceae; g__unclassified; s__unclassified	1	1	0	0	1	4	0	0	0	2	6	0	0	0	1	16	1	0	0	0	0	0	0	5	0	0	0	0	0	2
OTU_10081	d__Bacteria; p__Proteobacteria; c__Alphaproteobacteria; o__Rhodospirillales; f__Acetobacteraceae; g__unclassified; s__unclassified	0	0	0	0	0	0	0	0	0	0	0	0	0	1	0	0	0	0	0	0	0	0	1	0	0	0	0	0	0	0
OTU_10086	Unassigned	0	0	0	0	0	0	0	0	0	0	0	1	0	1	1	0	0	0	1	0	0	0	1	1	1	1	0	0	0	0
OTU_1009	d__Bacteria; p__Proteobacteria; c__Gammaproteobacteria; o__Xanthomonadales; f__Xanthomonadaceae; g__unclassified; s__unclassified	3	11	1	0	9	0	2	4	0	12	4	0	0	0	0	12	3	0	1	0	0	0	1	0	0	0	1	1	0	0
OTU_10094	Unassigned	0	0	0	0	0	0	0	1	1	0	0	0	0	0	1	0	0	0	0	0	0	0	0	0	1	0	0	0	0	0
OTU_10099	d__Bacteria; p__Proteobacteria; c__Alphaproteobacteria; o__Rhizobiales; f__Bradyrhizobiaceae; g__unclassified; s__unclassified	0	0	0	0	0	0	0	0	0	0	1	0	0	0	3	0	0	0	0	0	0	0	0	0	0	0	0	0	0	0
OTU_101	d__Bacteria; p__Actinobacteria; c__unclassified; o__Streptomycetales; f__Streptomycetaceae; g__unclassified; s__unclassified	31	132	14	39	54	32	54	60	15	51	58	12	27	1	5	16	22	4	2	14	3	8	13	13	2	68	34	1	27	68
OTU_1010	Unassigned	0	0	0	0	0	0	0	0	0	0	0	0	0	3	0	14	0	0	0	0	0	0	0	0	0	0	0	0	0	0
OTU_10101	Unassigned	0	0	1	0	0	0	0	0	0	0	0	0	0	1	1	0	0	0	0	0	0	0	0	0	2	0	0	1	0	0
OTU_10104	d__Bacteria; p__unclassified; c__unclassified; o__unclassified; f__unclassified; g__unclassified; s__unclassified	0	0	0	0	0	0	0	0	0	0	0	0	0	0	2	0	0	0	0	0	0	0	0	0	0	0	0	0	0	0
OTU_10105	d__Bacteria; p__Planctomycetes; c__Planctomycetia; o__Planctomycetales; f__Gemmataceae; g__unclassified; s__unclassified	0	0	0	0	0	0	0	0	0	0	0	0	0	0	2	0	0	0	0	0	0	0	0	0	0	0	0	0	0	0
OTU_10108	d__Bacteria; p__Firmicutes; c__Bacilli; o__Bacillales; f__Paenibacillaceae; g__unclassified; s__unclassified	0	0	0	0	0	0	0	0	0	0	0	0	0	0	2	0	0	0	0	0	0	0	0	0	0	0	0	0	0	0
OTU_10109	d__Bacteria; p__Proteobacteria; c__Gammaproteobacteria; o__Pseudomonadales; f__Pseudomonadaceae; g__unclassified; s__unclassified	0	0	0	0	1	0	0	0	0	0	0	0	0	0	1	0	0	0	1	1	0	0	0	0	0	1	0	0	2	0
OTU_1011	Unassigned	2	1	3	6	0	3	0	0	1	0	1	1	8	3	2	0	1	16	2	0	1	1	0	3	4	0	1	0	0	0
OTU_10111	d__Bacteria; p__Actinobacteria; c__unclassified; o__Pseudonocardiales; f__Pseudonocardiaceae; g__unclassified; s__unclassified	0	0	0	0	0	0	0	0	0	0	0	0	2	0	2	0	0	0	0	0	2	0	0	0	3	1	3	2	0	0
OTU_10112	d__Bacteria; p__Actinobacteria; c__unclassified; o__Streptomycetales; f__Streptomycetaceae; g__unclassified; s__unclassified	0	0	0	0	0	0	0	0	0	0	0	0	0	0	1	0	0	0	0	0	0	0	0	3	0	0	0	0	0	0
OTU_10118	d__Bacteria; p__Proteobacteria; c__Gammaproteobacteria; o__unclassified; f__unclassified; g__unclassified; s__unclassified	0	0	0	0	0	0	0	0	0	0	0	0	0	0	2	0	0	0	0	0	0	0	0	0	0	0	0	0	0	0
OTU_1012	d__Bacteria; p__unclassified; c__unclassified; o__unclassified; f__unclassified; g__unclassified; s__unclassified	0	1	2	1	11	5	4	0	1	4	0	9	1	0	0	0	0	13	6	0	0	1	1	4	4	0	2	0	0	3
OTU_10120	Unassigned	0	0	0	0	0	0	0	0	0	0	0	0	0	0	3	0	0	0	1	0	0	0	0	0	0	0	0	0	0	0
OTU_10122	Unassigned	0	0	0	1	0	0	0	0	0	0	0	0	0	0	2	0	0	0	0	0	0	0	0	0	0	0	0	0	0	0
OTU_10124	d__Bacteria; p__Proteobacteria; c__Alphaproteobacteria; o__Rhizobiales; f__Bradyrhizobiaceae; g__unclassified; s__unclassified	0	0	0	0	0	0	0	0	0	0	0	0	0	0	1	0	0	0	0	0	0	0	0	0	0	0	0	0	0	0
OTU_10125	d__Bacteria; p__unclassified; c__unclassified; o__unclassified; f__unclassified; g__unclassified; s__unclassified	0	0	0	0	0	0	0	0	0	0	0	0	0	0	1	0	0	0	0	0	0	0	0	0	0	0	0	0	0	0
OTU_10128	Unassigned	0	0	0	0	0	0	0	0	0	0	0	0	0	0	2	0	0	0	0	0	0	1	0	0	0	0	0	0	0	0
OTU_10129	d__Bacteria; p__Planctomycetes; c__Planctomycetia; o__Planctomycetales; f__Gemmataceae; g__unclassified; s__unclassified	0	0	0	0	0	0	0	0	0	0	0	0	0	0	2	0	0	0	0	0	0	0	0	0	0	0	0	0	0	0
OTU_1013	Unassigned	0	3	1	1	5	5	4	6	0	1	1	3	0	0	1	3	3	0	0	1	0	0	0	0	0	1	1	3	0	0
OTU_10130	d__Bacteria; p__Firmicutes; c__Bacilli; o__Bacillales; f__Paenibacillaceae; g__unclassified; s__unclassified	0	0	0	0	0	0	0	0	0	0	0	0	0	0	2	0	0	0	0	0	0	0	0	0	0	0	0	0	0	0
OTU_10132	d__Bacteria; p__Planctomycetes; c__Planctomycetia; o__Planctomycetales; f__unclassified; g__unclassified; s__unclassified	0	0	0	0	0	0	0	0	0	0	0	0	0	1	1	0	0	0	0	0	0	0	0	0	1	0	0	0	0	0
OTU_10133	Unassigned	0	0	0	0	0	0	0	0	0	0	0	0	0	0	2	0	0	1	0	0	0	0	0	0	0	0	0	1	0	0
OTU_10135	d__Bacteria; p__Actinobacteria; c__unclassified; o__unclassified; f__unclassified; g__unclassified; s__unclassified	0	0	0	0	0	0	0	0	0	0	0	0	0	0	2	0	0	0	0	0	0	0	0	0	0	0	0	0	0	0
OTU_10137	d__Bacteria; p__Planctomycetes; c__Planctomycetia; o__Planctomycetales; f__unclassified; g__unclassified; s__unclassified	0	0	0	0	0	0	0	0	0	0	0	0	0	0	1	0	0	0	0	0	0	0	0	0	0	0	0	0	0	0
OTU_10138	d__Bacteria; p__Proteobacteria; c__Alphaproteobacteria; o__Rhizobiales; f__Bradyrhizobiaceae; g__unclassified; s__unclassified	0	0	0	0	0	0	0	0	0	0	0	0	0	0	2	0	0	0	0	0	0	0	0	0	0	0	0	0	0	0
OTU_1014	d__Bacteria; p__Actinobacteria; c__unclassified; o__Streptomycetales; f__Streptomycetaceae; g__unclassified; s__unclassified	5	26	11	5	18	11	18	10	1	5	9	0	16	0	0	16	17	0	1	0	0	0	0	4	0	10	30	3	5	6
OTU_10142	d__Bacteria; p__Proteobacteria; c__Gammaproteobacteria; o__Xanthomonadales; f__Xanthomonadaceae; g__unclassified; s__unclassified	0	0	0	0	0	0	0	0	0	0	0	1	0	0	3	0	0	0	0	0	0	0	0	0	0	0	0	0	0	0
OTU_10143	d__Bacteria; p__Proteobacteria; c__Alphaproteobacteria; o__Caulobacterales; f__Caulobacteraceae; g__unclassified; s__unclassified	0	0	0	0	0	0	0	0	0	0	0	0	0	0	2	0	0	0	0	0	0	0	0	0	0	0	0	0	0	0
OTU_10147	d__Bacteria; p__Proteobacteria; c__Alphaproteobacteria; o__Rhodospirillales; f__Acetobacteraceae; g__unclassified; s__unclassified	0	2	0	0	1	0	0	0	0	0	2	1	1	0	0	0	0	0	0	1	2	0	0	0	0	0	1	0	0	0
OTU_10148	Unassigned	0	0	0	0	0	0	0	0	0	0	0	0	0	0	0	0	0	0	0	0	0	0	0	0	0	0	0	0	0	0
OTU_10149	Unassigned	0	0	1	0	0	0	0	0	0	0	0	0	0	1	0	0	0	0	0	0	0	0	0	0	2	0	0	0	0	0
OTU_1015	d__Bacteria; p__Actinobacteria; c__unclassified; o__Streptomycetales; f__Streptomycetaceae; g__unclassified; s__unclassified	10	11	3	5	7	8	3	7	1	12	11	11	4	4	0	21	18	4	1	9	6	7	7	8	11	5	8	5	4	3
OTU_10150	d__Bacteria; p__Actinobacteria; c__unclassified; o__Streptomycetales; f__Streptomycetaceae; g__unclassified; s__unclassified	0	0	1	0	0	0	0	0	0	0	0	0	0	0	0	0	1	0	0	0	0	0	0	1	0	0	0	0	0	0
OTU_10151	d__Bacteria; p__Actinobacteria; c__unclassified; o__Streptomycetales; f__Streptomycetaceae; g__unclassified; s__unclassified	0	0	0	0	0	0	0	0	0	0	0	0	0	0	0	0	0	0	0	0	0	0	0	0	0	0	0	0	0	0
OTU_10153	d__Bacteria; p__Actinobacteria; c__unclassified; o__Micromonosporales; f__Micromonosporaceae; g__Actinoplanes; s__unclassified	0	0	0	0	0	0	0	0	2	0	0	0	0	0	0	0	0	0	0	0	1	0	1	0	0	1	0	0	0	0
OTU_10154	d__Bacteria; p__Proteobacteria; c__Gammaproteobacteria; o__Pseudomonadales; f__Pseudomonadaceae; g__unclassified; s__unclassified	0	0	0	0	0	0	0	0	0	0	0	0	0	1	0	0	0	0	0	0	0	0	0	0	0	0	0	0	0	0
OTU_10158	d__Bacteria; p__Actinobacteria; c__unclassified; o__Streptomycetales; f__Streptomycetaceae; g__Streptomyces; s__unclassified	0	0	0	0	2	0	0	0	0	0	2	0	2	0	0	0	0	0	0	0	0	0	0	1	0	1	0	0	2	0
OTU_10159	d__Bacteria; p__Proteobacteria; c__Alphaproteobacteria; o__Rhizobiales; f__Bradyrhizobiaceae; g__unclassified; s__unclassified	0	0	0	0	0	0	0	0	0	0	0	0	0	1	0	0	0	0	0	0	0	0	0	0	0	0	0	0	0	0
OTU_1016	d__Bacteria; p__Actinobacteria; c__unclassified; o__Streptomycetales; f__Streptomycetaceae; g__unclassified; s__unclassified	0	0	7	2	3	9	1	4	7	0	3	12	3	15	1	12	11	3	4	0	0	19	0	3	11	7	5	4	1	0
OTU_10161	Unassigned	0	0	0	0	0	0	0	0	0	0	0	0	0	0	0	0	0	0	1	0	0	0	0	0	0	0	0	0	0	0
OTU_10162	Unassigned	0	2	0	0	0	0	0	0	0	0	0	0	0	0	0	0	0	0	0	0	0	0	0	0	0	0	0	0	0	0
OTU_10163	d__Bacteria; p__Proteobacteria; c__Alphaproteobacteria; o__Rhizobiales; f__Bradyrhizobiaceae; g__unclassified; s__unclassified	0	0	0	0	0	1	0	0	0	0	0	0	0	0	0	0	0	0	0	0	0	0	0	0	0	0	0	0	0	0
OTU_10164	d__Bacteria; p__Proteobacteria; c__Alphaproteobacteria; o__Caulobacterales; f__Caulobacteraceae; g__unclassified; s__unclassified	1	0	0	0	0	0	0	1	0	1	1	0	2	0	0	0	0	0	0	0	0	0	0	0	0	0	0	0	0	1
OTU_10166	d__Bacteria; p__Proteobacteria; c__Gammaproteobacteria; o__Xanthomonadales; f__Xanthomonadaceae; g__unclassified; s__unclassified	0	0	1	0	0	1	0	0	0	1	0	0	0	0	0	0	0	0	0	0	0	0	0	1	0	0	0	0	0	2
OTU_10167	d__Bacteria; p__Actinobacteria; c__unclassified; o__Pseudonocardiales; f__Pseudonocardiaceae; g__unclassified; s__unclassified	0	0	0	0	0	0	0	0	0	0	0	0	0	0	0	0	0	0	0	0	0	0	0	0	0	0	0	0	0	0
OTU_1017	Unassigned	0	0	0	0	2	0	0	0	0	0	0	0	0	1	0	0	9	0	0	0	0	14	4	0	0	0	0	0	1	0
OTU_10170	d__Bacteria; p__unclassified; c__unclassified; o__unclassified; f__unclassified; g__unclassified; s__unclassified	0	0	0	0	0	0	0	0	0	0	0	0	0	0	0	0	0	0	0	0	0	0	0	0	0	0	0	0	2	0
OTU_10171	d__Bacteria; p__Planctomycetes; c__Planctomycetia; o__Planctomycetales; f__unclassified; g__unclassified; s__unclassified	0	0	0	0	0	0	1	0	0	0	0	0	0	0	0	0	0	0	0	0	0	0	0	0	0	0	0	1	0	0
OTU_10174	d__Bacteria; p__Proteobacteria; c__Gammaproteobacteria; o__Pseudomonadales; f__Pseudomonadaceae; g__unclassified; s__unclassified	0	0	0	2	0	1	0	0	0	0	0	0	0	0	0	0	0	0	0	0	0	0	0	0	0	0	0	0	0	0
OTU_10175	Unassigned	0	0	0	0	0	0	0	0	2	0	0	1	1	0	2	0	0	0	0	0	0	1	2	1	0	0	0	1	0	0
OTU_10176	d__Bacteria; p__Proteobacteria; c__Alphaproteobacteria; o__Rhizobiales; f__Bradyrhizobiaceae; g__unclassified; s__unclassified	0	0	0	0	0	0	0	0	0	0	0	0	0	0	0	0	0	0	0	0	0	0	0	0	0	0	0	0	0	0
OTU_10177	d__Bacteria; p__Proteobacteria; c__Alphaproteobacteria; o__Rhizobiales; f__Bradyrhizobiaceae; g__unclassified; s__unclassified	0	0	0	0	1	0	0	0	0	0	1	0	0	0	0	0	0	0	0	0	0	0	0	0	0	0	0	0	0	0
OTU_10178	Unassigned	0	0	0	0	0	0	0	0	0	0	0	0	0	0	0	0	0	0	0	0	0	0	0	0	0	0	0	0	1	0
OTU_1018	d__Bacteria; p__unclassified; c__unclassified; o__unclassified; f__unclassified; g__unclassified; s__unclassified	0	0	0	0	0	2	0	1	0	0	0	4	0	5	2	0	0	0	0	0	0	6	0	1	14	0	0	0	0	0
OTU_10180	Unassigned	0	0	0	0	1	0	0	0	0	0	0	0	0	0	0	0	0	0	0	0	0	0	0	0	0	1	1	0	0	0
OTU_10183	Unassigned	0	1	0	0	0	0	0	0	0	0	0	0	0	0	0	0	0	0	0	0	0	0	0	0	0	0	0	0	0	0
OTU_10184	d__Bacteria; p__Actinobacteria; c__unclassified; o__Streptomycetales; f__Streptomycetaceae; g__unclassified; s__unclassified	0	0	0	0	0	0	0	0	0	0	0	0	0	0	0	0	0	0	0	0	0	0	0	0	0	0	0	0	0	0
OTU_10185	d__Bacteria; p__Planctomycetes; c__unclassified; o__unclassified; f__unclassified; g__unclassified; s__unclassified	0	0	0	0	0	0	0	0	0	0	0	0	0	0	0	0	0	0	0	0	0	0	0	0	0	0	0	0	0	0
OTU_10186	Unassigned	0	0	0	0	0	0	0	1	0	0	1	0	0	0	0	0	0	0	0	0	0	0	0	0	0	0	0	0	0	0
OTU_10188	Unassigned	0	0	0	0	0	0	0	0	0	0	0	0	0	0	0	0	0	0	0	0	0	0	0	0	0	0	0	0	1	0
OTU_10189	d__Bacteria; p__Proteobacteria; c__Alphaproteobacteria; o__Rhizobiales; f__unclassified; g__unclassified; s__unclassified	0	0	0	0	0	0	0	0	0	0	0	0	0	0	0	0	0	0	0	0	0	0	0	0	0	0	0	0	0	0
OTU_1019	d__Bacteria; p__Planctomycetes; c__Planctomycetia; o__Planctomycetales; f__Isosphaeraceae; g__unclassified; s__unclassified	6	0	6	13	7	6	4	2	1	7	4	1	4	0	0	2	5	0	0	6	0	0	2	2	0	17	2	0	7	0
OTU_10190	Unassigned	0	0	0	0	0	0	0	0	0	0	0	0	0	0	0	0	0	0	0	0	0	0	0	0	0	0	0	0	0	0
OTU_10191	Unassigned	0	0	0	0	0	0	0	0	0	0	0	0	0	0	0	0	0	0	0	0	0	0	0	0	1	0	0	0	0	0
OTU_10192	d__Bacteria; p__Actinobacteria; c__unclassified; o__Streptomycetales; f__Streptomycetaceae; g__unclassified; s__unclassified	0	0	0	0	0	0	0	0	0	0	0	0	0	0	0	0	1	0	0	0	0	0	0	0	2	1	0	0	0	0
OTU_10193	d__Bacteria; p__Actinobacteria; c__Rubrobacteria; o__Rubrobacterales; f__Rubrobacteraceae; g__unclassified; s__unclassified	0	0	0	0	0	0	0	0	0	1	0	0	0	0	0	0	0	0	0	0	0	0	0	0	0	0	0	0	0	0
OTU_10194	d__Bacteria; p__Planctomycetes; c__Planctomycetia; o__Planctomycetales; f__Isosphaeraceae; g__unclassified; s__unclassified	0	0	0	0	0	0	0	0	0	0	0	0	0	0	0	0	0	0	0	0	0	0	0	0	0	0	0	0	0	0
OTU_10196	d__Bacteria; p__unclassified; c__unclassified; o__unclassified; f__unclassified; g__unclassified; s__unclassified	0	0	0	0	0	0	0	0	0	0	0	0	0	0	0	0	0	0	0	0	0	0	0	0	0	0	0	0	0	0
OTU_10198	d__Bacteria; p__Actinobacteria; c__unclassified; o__Streptomycetales; f__Streptomycetaceae; g__unclassified; s__unclassified	0	1	0	0	0	0	0	0	0	0	0	0	1	0	0	0	1	1	0	0	0	2	0	1	0	0	0	0	1	0
OTU_10199	Unassigned	0	0	0	0	0	0	0	0	0	0	0	0	0	0	0	0	0	0	0	5	0	0	0	0	0	0	0	0	0	0
OTU_102	d__Bacteria; p__Planctomycetes; c__Planctomycetia; o__Planctomycetales; f__Isosphaeraceae; g__unclassified; s__unclassified	21	25	38	132	14	36	13	40	6	24	66	3	26	0	11	34	49	0	0	46	12	6	19	28	4	123	55	7	88	14
OTU_10200	Unassigned	0	0	0	0	0	0	0	0	0	0	0	0	0	0	0	0	0	0	0	0	0	0	0	0	0	0	0	0	0	0
OTU_10201	d__Bacteria; p__Actinobacteria; c__unclassified; o__Streptomycetales; f__Streptomycetaceae; g__unclassified; s__unclassified	0	0	0	0	0	0	0	0	0	0	0	0	0	1	0	0	0	0	2	0	0	0	0	0	0	0	1	0	0	1
OTU_10202	d__Bacteria; p__Firmicutes; c__Bacilli; o__Bacillales; f__Paenibacillaceae; g__unclassified; s__unclassified	0	0	1	0	0	0	0	0	0	0	0	0	0	0	0	0	0	0	2	0	0	0	0	0	0	0	0	0	0	0
OTU_1021	d__Bacteria; p__Proteobacteria; c__Alphaproteobacteria; o__Caulobacterales; f__Caulobacteraceae; g__unclassified; s__unclassified	2	2	5	17	8	4	4	21	10	3	1	3	7	8	2	5	1	6	4	4	4	0	2	5	4	4	44	10	9	2
OTU_10210	d__Bacteria; p__Actinobacteria; c__unclassified; o__Streptomycetales; f__Streptomycetaceae; g__unclassified; s__unclassified	0	0	0	0	0	0	0	0	0	0	0	0	0	0	0	0	0	0	3	0	0	0	0	0	0	0	0	0	0	0
OTU_10212	Unassigned	0	0	0	0	0	0	0	0	0	0	0	0	0	0	0	0	0	0	2	0	0	0	0	0	0	0	0	0	0	0
OTU_10217	d__Bacteria; p__Proteobacteria; c__unclassified; o__unclassified; f__unclassified; g__unclassified; s__unclassified	0	0	0	0	0	0	0	0	0	0	0	0	0	0	0	0	0	0	2	0	0	0	0	0	0	0	0	0	0	0
OTU_10218	d__Bacteria; p__Planctomycetes; c__Planctomycetia; o__Planctomycetales; f__Isosphaeraceae; g__unclassified; s__unclassified	0	0	0	0	0	0	0	0	0	0	0	0	0	0	0	0	0	0	2	0	0	0	0	0	0	0	0	0	0	0
OTU_1022	d__Bacteria; p__Proteobacteria; c__Alphaproteobacteria; o__Caulobacterales; f__Caulobacteraceae; g__unclassified; s__unclassified	0	0	0	0	1	6	4	0	0	4	0	0	0	0	0	0	3	0	0	0	0	0	0	0	0	0	21	0	0	2
OTU_10220	Unassigned	0	0	0	0	0	0	0	0	0	0	0	0	0	0	0	0	0	1	0	0	0	0	0	0	0	0	0	0	0	0
OTU_10222	d__Bacteria; p__Proteobacteria; c__Betaproteobacteria; o__Burkholderiales; f__Burkholderiaceae; g__unclassified; s__unclassified	0	0	0	0	0	0	0	0	0	0	0	0	0	0	0	0	0	0	2	0	0	0	0	0	0	0	0	0	0	0
OTU_10227	d__Bacteria; p__Planctomycetes; c__Planctomycetia; o__Planctomycetales; f__unclassified; g__unclassified; s__unclassified	0	0	0	0	0	0	0	0	0	0	0	0	0	0	0	0	0	0	3	0	0	0	0	0	0	0	0	0	0	0
OTU_10229	d__Bacteria; p__Proteobacteria; c__Alphaproteobacteria; o__Rhodobacterales; f__Rhodobacteraceae; g__unclassified; s__unclassified	0	0	0	0	0	0	0	0	0	0	0	1	0	0	0	0	0	0	1	0	0	0	0	1	0	0	0	0	0	0
OTU_1023	d__Bacteria; p__Proteobacteria; c__Alphaproteobacteria; o__Rhizobiales; f__Bradyrhizobiaceae; g__Bradyrhizobium; s__unclassified	0	4	3	3	0	0	0	5	6	2	0	0	0	4	2	0	4	6	1	6	10	8	3	2	3	0	0	7	0	3
OTU_10230	d__Bacteria; p__Planctomycetes; c__unclassified; o__unclassified; f__unclassified; g__unclassified; s__unclassified	0	0	0	0	0	0	0	0	0	0	0	0	0	0	0	0	0	0	1	0	0	0	0	0	0	0	0	0	0	0
OTU_10231	d__Bacteria; p__Actinobacteria; c__unclassified; o__Micromonosporales; f__Micromonosporaceae; g__Actinoplanes; s__unclassified	0	0	0	0	0	0	0	0	0	0	0	0	0	0	0	0	0	0	2	0	0	0	0	0	0	0	0	0	0	0
OTU_10233	Unassigned	0	0	0	0	0	0	0	0	0	0	0	0	0	0	0	0	0	0	0	0	0	0	0	0	0	0	0	0	1	0
OTU_10234	Unassigned	0	0	0	0	0	0	0	0	0	0	0	0	0	3	0	0	0	1	3	0	0	2	0	0	0	0	0	0	0	0
OTU_10237	Unassigned	0	0	0	0	0	0	0	0	0	0	0	0	0	0	0	0	0	0	3	0	0	0	0	0	0	0	0	0	0	0
OTU_1024	d__Bacteria; p__Actinobacteria; c__unclassified; o__Pseudonocardiales; f__Pseudonocardiaceae; g__unclassified; s__unclassified	5	2	4	0	6	0	2	7	1	7	0	5	3	2	7	1	2	1	4	1	0	0	1	3	5	5	5	4	2	10
OTU_10241	d__Bacteria; p__Planctomycetes; c__Planctomycetia; o__Planctomycetales; f__Planctomycetaceae; g__unclassified; s__unclassified	0	0	0	0	0	0	0	0	0	0	0	0	0	0	0	0	0	0	1	0	0	0	0	0	0	0	0	0	0	0
OTU_10242	d__Bacteria; p__Proteobacteria; c__Gammaproteobacteria; o__Xanthomonadales; f__Xanthomonadaceae; g__unclassified; s__unclassified	0	0	0	0	0	0	0	0	0	0	0	0	0	2	0	0	0	0	2	0	0	0	0	0	0	0	0	0	0	0
OTU_10245	d__Bacteria; p__Actinobacteria; c__unclassified; o__Streptomycetales; f__Streptomycetaceae; g__unclassified; s__unclassified	0	0	0	0	0	0	0	0	0	0	0	0	0	0	0	0	0	0	1	0	0	0	0	0	0	0	0	0	0	0
OTU_10249	Unassigned	0	0	0	0	0	0	0	0	0	0	0	0	0	0	0	0	0	0	2	0	0	0	0	0	0	0	0	0	0	0
OTU_1025	d__Bacteria; p__Proteobacteria; c__Alphaproteobacteria; o__Caulobacterales; f__Caulobacteraceae; g__Phenylobacterium; s__unclassified	0	1	5	0	0	0	0	0	2	3	0	0	0	0	1	0	0	0	0	2	15	2	0	9	1	1	0	2	12	0
OTU_10251	d__Bacteria; p__Actinobacteria; c__unclassified; o__Streptomycetales; f__Streptomycetaceae; g__unclassified; s__unclassified	0	0	0	0	0	0	0	0	0	0	0	0	0	0	0	0	0	0	2	0	0	0	0	0	0	1	0	0	0	0
OTU_10254	d__Bacteria; p__Actinobacteria; c__unclassified; o__Streptomycetales; f__Streptomycetaceae; g__Streptomyces; s__unclassified	0	0	0	0	1	0	0	0	0	0	0	0	0	0	0	0	0	0	5	0	0	0	0	0	0	0	0	0	0	0
OTU_10255	d__Bacteria; p__unclassified; c__unclassified; o__unclassified; f__unclassified; g__unclassified; s__unclassified	0	0	0	0	0	0	0	0	0	0	0	0	0	0	0	0	0	0	2	0	0	0	0	0	0	0	0	0	0	0
OTU_10258	d__Bacteria; p__Proteobacteria; c__Alphaproteobacteria; o__Rhizobiales; f__Bradyrhizobiaceae; g__unclassified; s__unclassified	0	0	0	0	0	0	0	0	0	0	0	0	0	0	0	0	0	0	2	0	0	0	0	0	2	0	0	3	0	0
OTU_1026	Unassigned	0	5	0	0	3	0	0	30	0	0	0	0	0	0	0	2	7	0	0	0	0	0	0	0	0	0	0	0	1	1
OTU_10260	Unassigned	0	0	0	0	0	0	0	0	0	0	0	0	0	0	0	0	0	0	4	0	0	0	0	0	0	0	0	0	0	0
OTU_10261	d__Bacteria; p__Proteobacteria; c__Gammaproteobacteria; o__Xanthomonadales; f__Xanthomonadaceae; g__unclassified; s__unclassified	0	0	0	0	0	1	0	0	0	0	0	0	1	0	0	0	0	1	3	0	0	0	0	0	0	0	0	0	0	1
OTU_10262	d__Bacteria; p__Planctomycetes; c__Planctomycetia; o__Planctomycetales; f__unclassified; g__unclassified; s__unclassified	0	0	0	0	0	0	0	0	0	0	0	0	0	0	0	0	0	0	2	0	0	1	0	0	0	0	0	0	0	0
OTU_10265	d__Bacteria; p__Planctomycetes; c__Planctomycetia; o__Planctomycetales; f__unclassified; g__unclassified; s__unclassified	0	0	0	0	0	0	0	0	0	0	0	0	0	0	0	0	0	0	1	0	0	0	0	0	0	0	0	0	0	0
OTU_10266	d__Bacteria; p__Planctomycetes; c__Planctomycetia; o__Planctomycetales; f__unclassified; g__unclassified; s__unclassified	0	0	0	0	0	0	0	0	0	0	0	0	0	0	0	0	0	0	0	3	0	0	0	0	0	0	0	0	0	0
OTU_1027	d__Bacteria; p__Planctomycetes; c__Planctomycetia; o__Planctomycetales; f__Isosphaeraceae; g__unclassified; s__unclassified	4	2	3	2	1	2	1	3	17	0	3	1	7	0	0	5	2	0	5	1	0	0	9	5	9	8	5	0	3	2
OTU_10273	d__Bacteria; p__Planctomycetes; c__Planctomycetia; o__Planctomycetales; f__unclassified; g__unclassified; s__unclassified	0	0	0	0	0	0	0	0	0	0	0	0	0	0	0	0	0	0	0	3	0	0	0	0	0	0	0	0	0	0
OTU_10275	d__Bacteria; p__Proteobacteria; c__Alphaproteobacteria; o__Rhizobiales; f__Bradyrhizobiaceae; g__unclassified; s__unclassified	0	0	0	0	0	0	0	0	0	0	0	0	0	0	0	0	0	0	0	3	0	0	0	0	0	0	0	0	0	0
OTU_1028	Unassigned	0	1	1	1	0	0	1	0	6	0	0	1	3	0	4	0	0	1	1	0	2	0	12	4	2	0	7	0	1	5
OTU_1029	d__Bacteria; p__Actinobacteria; c__unclassified; o__Streptomycetales; f__Streptomycetaceae; g__unclassified; s__unclassified	2	0	0	1	4	0	5	0	0	0	2	0	0	1	0	0	0	0	2	0	0	0	0	0	4	0	1	0	1	0
OTU_10291	d__Bacteria; p__Proteobacteria; c__Alphaproteobacteria; o__Caulobacterales; f__Caulobacteraceae; g__unclassified; s__unclassified	0	0	0	0	0	0	0	0	2	0	0	1	0	0	0	0	0	0	0	3	0	0	0	0	0	0	0	0	0	0
OTU_10294	d__Bacteria; p__Proteobacteria; c__Alphaproteobacteria; o__Rhizobiales; f__Bradyrhizobiaceae; g__Bradyrhizobium; s__unclassified	0	0	0	0	0	0	0	0	0	0	0	0	0	0	0	0	0	0	0	3	0	0	0	0	0	0	0	0	0	0
OTU_10296	d__Bacteria; p__Proteobacteria; c__Alphaproteobacteria; o__Rhizobiales; f__Methylocystaceae; g__unclassified; s__unclassified	0	0	0	1	0	0	0	0	0	0	0	0	0	0	0	0	0	0	0	3	1	0	0	0	0	1	0	0	0	0
OTU_10297	Unassigned	0	0	0	0	0	0	0	0	0	0	0	0	0	0	0	0	0	0	0	6	0	0	0	0	0	0	0	0	0	0
OTU_10298	Unassigned	0	0	0	0	0	0	0	0	0	0	0	0	0	0	0	0	0	0	0	3	0	0	0	0	0	0	0	0	0	0
OTU_10299	d__Bacteria; p__Planctomycetes; c__Planctomycetia; o__Planctomycetales; f__unclassified; g__unclassified; s__unclassified	2	1	0	0	2	0	0	0	0	0	0	0	0	0	0	0	1	0	0	3	0	0	0	0	0	0	0	0	0	0
OTU_103	d__Bacteria; p__Proteobacteria; c__Alphaproteobacteria; o__Rhodospirillales; f__Acetobacteraceae; g__unclassified; s__unclassified	191	117	105	128	115	77	155	73	127	140	92	47	63	76	167	69	80	58	146	281	160	97	120	115	220	151	195	60	58	80
OTU_1030	d__Bacteria; p__Actinobacteria; c__unclassified; o__Streptomycetales; f__Streptomycetaceae; g__unclassified; s__unclassified	0	1	0	0	0	0	0	0	1	0	0	1	0	0	1	0	0	2	0	0	3	0	1	3	1	0	0	0	0	2
OTU_10306	d__Bacteria; p__Planctomycetes; c__Planctomycetia; o__Planctomycetales; f__unclassified; g__unclassified; s__unclassified	0	0	0	0	0	0	0	0	0	0	0	0	0	0	0	0	0	0	0	3	0	0	0	0	0	0	0	0	0	0
OTU_10307	Unassigned	0	0	0	0	0	0	0	0	0	0	0	0	1	0	0	0	0	0	0	3	0	0	0	0	0	2	0	0	0	0
OTU_10308	d__Bacteria; p__Planctomycetes; c__Planctomycetia; o__Planctomycetales; f__unclassified; g__unclassified; s__unclassified	0	0	1	0	0	0	1	0	0	0	0	0	0	0	1	0	0	0	0	3	0	0	0	0	0	1	0	0	0	0
OTU_1031	d__Bacteria; p__Proteobacteria; c__Gammaproteobacteria; o__Pseudomonadales; f__Pseudomonadaceae; g__unclassified; s__unclassified	0	0	0	0	0	0	0	0	0	0	0	0	0	0	0	0	0	0	0	0	0	0	0	0	0	0	0	0	0	0
OTU_10310	d__Bacteria; p__Actinobacteria; c__unclassified; o__Streptomycetales; f__Streptomycetaceae; g__unclassified; s__unclassified	0	0	0	0	0	0	0	0	0	0	0	0	1	0	4	0	0	0	0	0	2	0	0	0	0	0	0	1	0	0
OTU_10315	d__Bacteria; p__Proteobacteria; c__unclassified; o__unclassified; f__unclassified; g__unclassified; s__unclassified	1	0	0	0	0	0	0	0	0	0	0	0	0	0	0	0	0	0	0	0	0	0	0	0	0	0	0	0	1	0
OTU_10318	Unassigned	0	0	0	0	0	0	0	0	0	0	0	0	0	0	1	0	0	0	0	0	1	1	0	0	1	0	0	0	0	0
OTU_1032	Unassigned	0	1	2	2	8	4	12	0	9	2	18	0	9	2	0	3	5	0	4	1	4	2	2	15	3	12	1	3	11	2
OTU_10321	d__Bacteria; p__unclassified; c__unclassified; o__unclassified; f__unclassified; g__unclassified; s__unclassified	0	0	1	0	0	0	0	0	0	1	0	0	0	0	0	0	0	0	0	0	2	0	0	0	0	0	0	0	0	0
OTU_10327	d__Bacteria; p__Proteobacteria; c__Gammaproteobacteria; o__Xanthomonadales; f__Xanthomonadaceae; g__unclassified; s__unclassified	0	0	0	0	0	0	0	0	0	0	0	0	0	0	0	0	0	2	0	0	3	0	0	0	2	0	0	0	0	0
OTU_10328	d__Bacteria; p__Proteobacteria; c__Gammaproteobacteria; o__Xanthomonadales; f__Xanthomonadaceae; g__unclassified; s__unclassified	2	0	4	2	1	3	1	0	5	2	0	6	2	5	14	2	4	10	8	0	10	12	5	2	5	1	0	2	3	2
OTU_1033	d__Bacteria; p__Planctomycetes; c__unclassified; o__unclassified; f__unclassified; g__unclassified; s__unclassified	2	0	1	0	0	2	1	0	0	2	2	1	1	9	6	0	0	4	7	0	15	3	0	4	4	1	1	1	1	0
OTU_10330	d__Bacteria; p__Actinobacteria; c__unclassified; o__Streptomycetales; f__Streptomycetaceae; g__Streptomyces; s__unclassified	0	0	0	1	0	0	0	0	0	0	0	0	0	0	0	0	0	0	0	0	0	0	0	0	0	0	0	0	0	0
OTU_10331	d__Bacteria; p__Planctomycetes; c__Planctomycetia; o__Planctomycetales; f__Isosphaeraceae; g__unclassified; s__unclassified	0	0	0	0	0	0	0	0	0	0	0	0	0	0	0	0	0	0	0	0	2	0	0	0	0	0	0	0	0	0
OTU_10334	d__Bacteria; p__Planctomycetes; c__Planctomycetia; o__Planctomycetales; f__unclassified; g__unclassified; s__unclassified	0	0	0	0	0	0	0	0	0	0	0	0	0	0	0	0	0	0	1	1	3	0	0	0	0	0	0	0	0	0
OTU_10336	d__Bacteria; p__unclassified; c__unclassified; o__unclassified; f__unclassified; g__unclassified; s__unclassified	0	0	0	0	0	0	1	0	0	0	0	0	0	0	0	0	0	0	0	0	3	0	0	0	0	0	0	0	0	0
OTU_10338	d__Bacteria; p__Proteobacteria; c__Alphaproteobacteria; o__Rhizobiales; f__Bradyrhizobiaceae; g__Bradyrhizobium; s__unclassified	0	0	0	0	0	0	0	0	0	0	0	0	0	1	0	0	0	0	0	0	3	0	0	0	0	0	0	0	0	0
OTU_10339	Unassigned	0	0	0	0	0	0	0	0	0	0	0	0	0	0	0	0	0	0	0	0	3	0	0	0	0	2	0	0	0	0
OTU_1034	d__Bacteria; p__Actinobacteria; c__unclassified; o__Streptomycetales; f__Streptomycetaceae; g__unclassified; s__unclassified	19	5	0	4	2	0	2	4	0	0	1	0	0	0	0	3	0	0	0	0	0	0	0	0	0	0	3	0	0	0
OTU_10340	Unassigned	0	0	0	0	0	0	0	0	0	0	0	0	0	0	0	0	0	0	0	0	4	0	0	2	0	0	0	0	0	0
OTU_10349	Unassigned	0	0	0	0	0	0	0	0	0	0	0	0	0	0	0	0	0	0	0	0	3	0	0	0	0	0	0	0	0	0
OTU_1035	d__Bacteria; p__Proteobacteria; c__Gammaproteobacteria; o__Pseudomonadales; f__Pseudomonadaceae; g__unclassified; s__unclassified	2	11	1	0	7	3	3	5	0	6	2	0	0	6	0	6	6	0	2	0	0	0	0	0	1	5	3	1	4	4
OTU_10350	d__Bacteria; p__Planctomycetes; c__Planctomycetia; o__Planctomycetales; f__unclassified; g__unclassified; s__unclassified	0	0	0	0	0	0	0	0	0	0	0	0	0	0	1	0	0	0	0	0	4	0	0	0	0	0	0	0	0	0
OTU_10353	d__Bacteria; p__Proteobacteria; c__Gammaproteobacteria; o__Pseudomonadales; f__Pseudomonadaceae; g__unclassified; s__unclassified	0	0	0	0	0	0	0	0	0	0	0	0	0	0	0	0	0	0	0	0	1	0	0	0	0	0	0	0	0	0
OTU_10359	Unassigned	0	0	0	0	0	0	0	0	0	0	0	0	0	0	0	0	0	0	1	0	1	0	0	0	0	0	0	0	0	0
OTU_1036	d__Bacteria; p__Actinobacteria; c__unclassified; o__unclassified; f__unclassified; g__unclassified; s__unclassified	1	17	0	2	15	5	4	5	1	12	1	0	8	0	0	6	16	0	0	0	0	1	0	0	0	9	2	0	7	1
OTU_10362	d__Bacteria; p__Proteobacteria; c__Gammaproteobacteria; o__Pseudomonadales; f__Pseudomonadaceae; g__unclassified; s__unclassified	0	0	0	0	0	0	0	0	0	0	0	0	0	0	0	0	0	0	0	0	2	0	0	0	0	0	0	0	0	0
OTU_10364	Unassigned	0	0	0	0	0	0	0	0	0	1	0	0	0	0	0	0	0	0	0	0	2	0	0	0	0	0	1	0	0	0
OTU_10365	Unassigned	0	0	0	0	0	0	0	0	0	0	0	0	0	0	0	0	0	0	0	0	2	0	0	0	0	0	0	0	0	0
OTU_10366	d__Bacteria; p__Actinobacteria; c__unclassified; o__Streptomycetales; f__Streptomycetaceae; g__unclassified; s__unclassified	0	1	0	0	0	1	2	0	0	0	0	0	0	1	0	0	0	0	0	0	4	0	0	0	0	0	1	0	0	0
OTU_10367	d__Bacteria; p__Actinobacteria; c__unclassified; o__Streptomycetales; f__Streptomycetaceae; g__unclassified; s__unclassified	0	0	0	1	0	0	0	0	0	0	0	0	0	0	0	0	0	0	0	0	1	0	0	0	0	0	0	0	0	0
OTU_10368	Unassigned	0	0	0	0	0	0	0	0	0	0	0	0	0	0	0	0	0	0	0	0	2	0	1	0	0	0	0	0	0	0
OTU_1037	Unassigned	2	2	5	17	2	1	6	2	1	0	1	9	7	0	0	8	3	3	9	6	10	2	12	2	3	1	9	3	2	10
OTU_10371	d__Bacteria; p__Proteobacteria; c__unclassified; o__unclassified; f__unclassified; g__unclassified; s__unclassified	1	0	0	2	1	0	0	2	0	0	0	0	1	0	2	0	3	0	0	0	0	0	0	0	0	2	0	1	0	0
OTU_10372	Unassigned	1	0	0	0	0	0	0	0	0	0	0	0	0	0	0	0	0	0	0	0	0	0	0	0	0	0	0	0	0	0
OTU_10376	Unassigned	1	0	0	0	0	1	1	0	0	1	0	0	0	0	0	0	0	0	0	0	0	0	0	0	0	0	0	0	0	0
OTU_10379	Unassigned	1	0	0	0	0	0	0	0	0	0	0	0	1	0	0	0	0	0	0	0	0	0	0	0	0	0	0	0	0	0
OTU_1038	d__Bacteria; p__Actinobacteria; c__unclassified; o__Streptomycetales; f__Streptomycetaceae; g__unclassified; s__unclassified	14	8	0	0	13	0	0	0	0	8	3	0	0	0	0	6	1	0	0	0	0	0	0	0	0	2	0	0	4	0
OTU_10382	Unassigned	0	1	0	0	0	0	0	1	0	0	0	0	0	0	0	0	0	0	0	0	0	0	0	0	0	0	0	0	0	0
OTU_10383	Unassigned	1	0	0	0	0	0	0	0	0	0	0	0	0	0	0	0	0	0	0	0	0	0	0	0	0	0	0	0	0	0
OTU_10384	Unassigned	0	0	0	0	0	0	1	0	0	0	0	0	0	0	0	0	0	0	0	0	0	0	0	0	0	0	0	0	0	0
OTU_1039	Unassigned	0	1	4	4	2	10	2	3	0	2	3	0	4	0	1	1	2	1	1	7	0	7	2	7	1	0	1	1	1	6
OTU_10390	d__Bacteria; p__Proteobacteria; c__Alphaproteobacteria; o__Caulobacterales; f__Caulobacteraceae; g__unclassified; s__unclassified	1	1	0	0	1	0	0	0	1	0	2	0	0	0	0	0	0	0	0	0	0	0	0	0	0	0	0	0	0	0
OTU_10393	d__Bacteria; p__Proteobacteria; c__Alphaproteobacteria; o__Rhizobiales; f__Bradyrhizobiaceae; g__unclassified; s__unclassified	0	0	0	0	0	0	0	0	0	0	0	0	0	0	0	0	1	0	0	0	0	0	0	0	0	0	0	0	0	0
OTU_10394	d__Bacteria; p__Proteobacteria; c__Gammaproteobacteria; o__Xanthomonadales; f__Xanthomonadaceae; g__unclassified; s__unclassified	0	0	0	0	0	0	1	0	0	0	0	0	0	0	0	0	0	0	0	0	0	0	0	0	0	0	0	0	0	0
OTU_10396	Unassigned	2	0	0	0	0	0	0	0	0	0	0	0	0	0	0	0	0	0	0	0	0	0	0	0	0	0	0	0	0	0
OTU_10397	d__Bacteria; p__unclassified; c__unclassified; o__unclassified; f__unclassified; g__unclassified; s__unclassified	1	0	0	0	0	0	0	0	0	0	0	0	0	0	0	0	0	0	0	0	0	0	0	0	0	0	2	0	0	0
OTU_10398	d__Bacteria; p__Proteobacteria; c__Alphaproteobacteria; o__Rhizobiales; f__Bradyrhizobiaceae; g__Bradyrhizobium; s__unclassified	0	0	0	0	0	2	0	0	0	1	0	0	2	2	0	2	0	0	1	0	0	0	0	1	0	1	0	0	0	0
OTU_104	d__Bacteria; p__Proteobacteria; c__Alphaproteobacteria; o__Rhodospirillales; f__Acetobacteraceae; g__unclassified; s__unclassified	1	0	3	2	1	0	7	0	2	0	8	15	1	12	97	0	0	84	12	12	36	17	25	21	8	3	6	9	2	23
OTU_1040	Unassigned	7	7	1	3	11	0	4	4	5	4	3	1	2	0	0	5	3	2	0	2	0	1	2	0	1	9	2	0	7	4
OTU_10403	d__Bacteria; p__Actinobacteria; c__unclassified; o__Streptomycetales; f__Streptomycetaceae; g__unclassified; s__unclassified	2	1	0	0	0	0	0	0	0	0	0	0	1	0	0	0	0	0	0	0	0	0	0	0	0	0	0	0	0	1
OTU_10404	Unassigned	0	1	0	0	0	0	0	0	0	0	0	0	0	0	0	0	0	0	0	0	0	0	0	1	0	0	0	0	0	0
OTU_10406	Unassigned	0	0	0	0	0	0	0	0	0	2	0	0	0	0	0	0	0	2	0	0	0	0	0	1	0	0	0	0	0	0
OTU_1041	d__Bacteria; p__Planctomycetes; c__Planctomycetia; o__Planctomycetales; f__Isosphaeraceae; g__unclassified; s__unclassified	0	0	0	1	0	0	1	0	0	0	0	0	0	2	2	0	0	0	3	0	0	0	1	0	0	0	4	2	0	2
OTU_10411	d__Bacteria; p__Actinobacteria; c__unclassified; o__Streptomycetales; f__Streptomycetaceae; g__unclassified; s__unclassified	2	0	0	0	0	0	0	0	0	0	0	0	1	0	0	0	0	0	0	0	0	0	0	0	0	0	0	0	0	0
OTU_10417	d__Bacteria; p__Actinobacteria; c__unclassified; o__Streptomycetales; f__Streptomycetaceae; g__unclassified; s__unclassified	1	0	0	0	0	0	0	0	0	0	0	0	0	0	0	0	0	0	0	0	0	0	0	0	0	0	0	0	0	0
OTU_1042	Unassigned	10	0	1	1	0	6	2	0	4	4	3	1	1	0	0	2	0	0	0	0	2	2	1	0	0	6	1	0	15	0
OTU_10420	d__Bacteria; p__Planctomycetes; c__Planctomycetia; o__Planctomycetales; f__Gemmataceae; g__unclassified; s__unclassified	1	0	0	0	0	0	0	0	0	0	0	0	0	0	0	0	0	0	0	0	0	0	0	0	0	0	0	0	0	0
OTU_10421	Unassigned	2	0	3	1	0	2	0	1	0	0	0	0	0	1	2	0	0	1	0	0	1	1	1	0	1	1	0	1	0	0
OTU_10422	d__Bacteria; p__Firmicutes; c__Bacilli; o__Bacillales; f__Paenibacillaceae; g__unclassified; s__unclassified	2	0	0	0	1	0	0	1	0	0	0	0	0	0	0	0	0	0	0	0	0	0	0	0	0	0	0	0	1	0
OTU_10424	d__Bacteria; p__unclassified; c__unclassified; o__unclassified; f__unclassified; g__unclassified; s__unclassified	0	0	0	0	0	0	0	0	0	0	0	0	0	0	0	0	0	0	0	0	0	0	0	1	0	0	0	0	0	0
OTU_10426	Unassigned	1	1	0	0	2	0	1	0	0	0	0	0	0	0	0	0	0	0	0	0	0	0	0	0	0	0	0	0	0	0
OTU_10431	d__Bacteria; p__Actinobacteria; c__unclassified; o__Streptomycetales; f__Streptomycetaceae; g__unclassified; s__unclassified	1	0	0	0	0	0	0	0	0	0	0	0	0	0	0	0	0	0	0	0	0	0	0	0	0	0	0	0	0	0
OTU_10435	d__Bacteria; p__Proteobacteria; c__Gammaproteobacteria; o__Xanthomonadales; f__Xanthomonadaceae; g__unclassified; s__unclassified	2	0	0	0	0	0	0	0	0	0	1	0	0	0	0	0	0	0	1	0	0	0	0	0	0	0	1	0	1	0
OTU_10439	d__Bacteria; p__Planctomycetes; c__Planctomycetia; o__Planctomycetales; f__unclassified; g__unclassified; s__unclassified	1	0	0	0	0	0	0	0	0	0	0	0	0	0	0	0	0	0	0	0	0	0	0	0	0	0	0	0	0	0
OTU_1044	Unassigned	7	2	0	24	5	4	7	6	0	5	2	0	0	1	3	9	3	2	1	0	0	1	1	7	5	14	4	3	20	9
OTU_10442	d__Bacteria; p__Planctomycetes; c__Planctomycetia; o__Planctomycetales; f__Isosphaeraceae; g__unclassified; s__unclassified	0	0	0	0	0	0	1	0	0	0	2	0	0	0	0	0	0	0	0	0	0	0	0	0	0	0	0	0	0	0
OTU_10448	d__Bacteria; p__Actinobacteria; c__Rubrobacteria; o__Rubrobacterales; f__Rubrobacteraceae; g__unclassified; s__unclassified	1	0	0	0	0	0	0	0	0	0	0	0	0	0	0	0	0	0	0	0	0	0	0	0	0	0	0	0	0	0
OTU_10449	d__Bacteria; p__Planctomycetes; c__Planctomycetia; o__Planctomycetales; f__Gemmataceae; g__unclassified; s__unclassified	2	0	0	0	0	0	0	0	0	0	0	0	0	0	0	0	0	0	0	0	0	0	0	0	0	0	0	0	0	0
OTU_1045	Unassigned	0	0	0	0	0	1	0	0	0	0	0	0	1	0	2	0	1	0	0	0	0	0	0	0	0	0	0	0	0	3
OTU_10450	d__Bacteria; p__Planctomycetes; c__Planctomycetia; o__Planctomycetales; f__Isosphaeraceae; g__unclassified; s__unclassified	1	0	0	0	0	0	0	0	0	0	0	0	0	0	0	0	0	0	0	0	0	0	0	0	0	0	0	0	0	0
OTU_10451	Unassigned	1	0	0	0	0	1	0	0	0	1	0	0	0	0	0	0	0	0	0	0	0	0	0	0	0	0	0	0	0	0
OTU_10453	d__Bacteria; p__Planctomycetes; c__Planctomycetia; o__Planctomycetales; f__unclassified; g__unclassified; s__unclassified	1	0	0	0	0	0	0	2	0	0	0	0	0	0	0	0	0	0	0	0	0	0	0	0	0	0	0	0	0	0
OTU_10454	d__Bacteria; p__Planctomycetes; c__Planctomycetia; o__Planctomycetales; f__unclassified; g__unclassified; s__unclassified	2	0	0	0	0	0	0	0	0	0	0	0	0	0	0	0	0	0	0	0	0	0	0	0	0	0	0	0	0	0
OTU_10455	d__Bacteria; p__Proteobacteria; c__Alphaproteobacteria; o__Rhodospirillales; f__Acetobacteraceae; g__unclassified; s__unclassified	2	0	0	0	0	0	0	0	0	0	0	0	0	0	0	0	0	0	0	0	0	0	0	0	0	0	0	0	0	0
OTU_10457	d__Bacteria; p__Actinobacteria; c__unclassified; o__Streptomycetales; f__Streptomycetaceae; g__Streptomyces; s__unclassified	2	0	0	0	0	0	0	0	0	0	0	0	0	0	0	0	0	0	0	0	0	0	0	0	0	0	0	0	0	0
OTU_10459	d__Bacteria; p__Planctomycetes; c__Planctomycetia; o__Planctomycetales; f__unclassified; g__unclassified; s__unclassified	1	0	0	0	0	0	0	0	0	0	0	0	0	0	0	0	0	0	0	0	0	0	0	0	0	0	0	0	0	1
OTU_1046	d__Bacteria; p__Proteobacteria; c__Gammaproteobacteria; o__Xanthomonadales; f__Xanthomonadaceae; g__unclassified; s__unclassified	0	2	2	1	3	0	0	0	1	1	5	18	2	8	13	0	1	7	5	4	9	18	4	4	4	7	1	8	9	6
OTU_10460	d__Bacteria; p__Firmicutes; c__Bacilli; o__Bacillales; f__Paenibacillaceae; g__unclassified; s__unclassified	2	0	0	0	0	0	0	0	0	1	0	0	0	0	0	0	2	0	0	0	0	0	0	0	0	0	0	0	0	0
OTU_10461	Unassigned	0	0	0	0	2	0	0	0	1	2	1	0	0	0	0	0	0	0	1	0	0	0	0	0	0	0	0	0	1	0
OTU_10462	d__Bacteria; p__Proteobacteria; c__unclassified; o__unclassified; f__unclassified; g__unclassified; s__unclassified	2	0	0	0	0	0	0	0	0	0	0	0	0	0	0	0	0	0	0	0	0	0	0	0	0	0	0	0	0	0
OTU_10465	Unassigned	1	0	0	0	0	0	0	0	0	0	0	0	0	0	0	0	0	0	0	0	0	0	0	0	0	0	0	0	0	0
OTU_10466	d__Bacteria; p__Proteobacteria; c__Alphaproteobacteria; o__Rhizobiales; f__Bradyrhizobiaceae; g__unclassified; s__unclassified	1	0	0	2	0	0	0	0	0	0	0	0	0	0	0	0	0	0	0	0	0	0	0	0	0	0	0	0	0	0
OTU_10467	Unassigned	2	0	0	0	0	2	0	0	1	0	0	0	0	0	1	0	0	2	3	0	1	2	0	0	0	0	0	0	0	0
OTU_10468	Unassigned	1	0	0	0	0	0	1	0	0	0	0	0	0	0	0	0	0	0	0	0	0	0	0	0	0	3	0	0	0	0
OTU_1047	Unassigned	0	5	0	0	5	8	5	13	1	6	10	1	0	0	0	10	5	0	0	0	0	0	0	0	0	0	2	0	0	0
OTU_10470	Unassigned	2	0	0	0	0	0	0	0	0	0	0	1	2	0	0	0	0	0	0	0	0	0	0	0	0	0	0	0	0	0
OTU_10472	d__Bacteria; p__Actinobacteria; c__unclassified; o__Streptomycetales; f__Streptomycetaceae; g__unclassified; s__unclassified	2	0	0	0	0	0	0	0	0	0	0	0	0	0	0	0	0	0	0	0	0	0	0	0	0	0	0	0	0	0
OTU_10473	Unassigned	10	16	0	1	11	0	3	12	0	4	9	0	2	0	0	5	1	0	0	0	0	0	0	0	0	0	1	0	0	0
OTU_10478	Unassigned	1	0	0	0	0	0	0	0	0	0	0	0	0	0	0	0	0	0	0	0	0	0	0	0	0	0	0	0	0	0
OTU_10479	d__Bacteria; p__Proteobacteria; c__unclassified; o__unclassified; f__unclassified; g__unclassified; s__unclassified	2	0	0	0	0	0	0	0	0	0	0	0	0	0	0	0	0	0	0	0	0	0	0	0	0	0	0	0	0	0
OTU_1048	d__Bacteria; p__Actinobacteria; c__unclassified; o__Micromonosporales; f__Micromonosporaceae; g__unclassified; s__unclassified	1	5	2	3	1	10	5	5	0	3	10	1	7	1	0	5	3	0	0	0	0	0	0	1	0	3	0	0	8	0
OTU_10482	Unassigned	1	1	0	0	0	0	0	0	0	0	0	0	0	0	0	0	0	0	0	0	0	0	0	0	0	0	0	0	0	0
OTU_10483	d__Bacteria; p__Proteobacteria; c__Gammaproteobacteria; o__Xanthomonadales; f__Xanthomonadaceae; g__unclassified; s__unclassified	1	0	0	0	0	0	0	0	0	0	0	0	0	0	0	0	0	0	0	0	0	0	0	0	0	0	0	1	1	0
OTU_10484	d__Bacteria; p__unclassified; c__unclassified; o__unclassified; f__unclassified; g__unclassified; s__unclassified	2	0	0	0	0	0	0	0	0	0	0	0	0	0	0	0	0	0	0	0	0	0	0	0	0	0	1	0	0	0
OTU_10485	d__Bacteria; p__Proteobacteria; c__Alphaproteobacteria; o__Rhodospirillales; f__unclassified; g__unclassified; s__unclassified	1	0	0	0	0	0	0	0	0	0	0	0	0	0	0	0	0	0	0	0	0	0	0	0	0	0	1	0	0	0
OTU_10486	Unassigned	2	0	1	0	0	0	0	0	0	0	0	0	0	0	0	0	0	0	0	0	0	0	0	0	0	0	1	0	0	0
OTU_10491	Unassigned	1	0	0	0	0	0	0	0	0	0	0	0	0	0	0	0	0	0	0	0	0	0	0	0	0	0	0	0	0	0
OTU_10492	d__Bacteria; p__Actinobacteria; c__unclassified; o__Streptomycetales; f__Streptomycetaceae; g__unclassified; s__unclassified	1	3	0	0	1	0	0	0	0	0	0	0	0	0	0	0	0	0	0	2	0	0	0	0	0	0	3	0	0	1
OTU_10494	Unassigned	1	0	0	0	0	0	0	0	0	0	0	0	0	0	0	0	0	0	0	0	0	0	0	0	0	0	0	0	0	0
OTU_10495	d__Bacteria; p__Planctomycetes; c__Planctomycetia; o__Planctomycetales; f__unclassified; g__unclassified; s__unclassified	1	0	0	0	0	0	0	0	0	0	0	0	0	0	0	0	0	0	0	0	0	0	0	0	0	0	0	0	0	0
OTU_10498	d__Bacteria; p__Actinobacteria; c__unclassified; o__Streptomycetales; f__Streptomycetaceae; g__unclassified; s__unclassified	1	0	0	0	0	0	0	0	0	0	0	0	0	0	0	0	0	0	0	0	0	0	0	0	0	0	0	0	0	0
OTU_10499	Unassigned	1	0	0	0	0	0	0	0	0	0	0	0	0	0	0	0	0	0	0	0	0	0	0	0	0	0	0	0	0	0
OTU_105	Unassigned	151	60	101	176	50	83	80	56	113	130	167	152	217	61	11	123	170	25	41	94	46	99	85	180	37	138	117	65	224	93
OTU_1050	Unassigned	0	0	0	1	0	1	5	1	1	1	0	10	0	3	3	10	1	2	0	0	0	2	0	0	0	0	0	9	0	0
OTU_10504	Unassigned	2	1	4	6	4	5	7	3	0	4	0	1	2	0	3	8	2	1	0	2	2	1	5	3	0	7	4	1	2	1
OTU_10506	d__Bacteria; p__Planctomycetes; c__Planctomycetia; o__Planctomycetales; f__unclassified; g__unclassified; s__unclassified	2	0	0	0	0	0	0	0	0	0	0	0	0	0	0	0	0	0	0	0	0	0	0	0	0	0	0	0	1	0
OTU_10508	d__Bacteria; p__Proteobacteria; c__Alphaproteobacteria; o__Rhizobiales; f__Bradyrhizobiaceae; g__unclassified; s__unclassified	2	0	0	0	0	0	0	0	1	0	0	0	0	0	0	0	1	0	0	0	0	0	0	0	0	1	0	0	1	0
OTU_10510	d__Bacteria; p__Actinobacteria; c__unclassified; o__Micromonosporales; f__Micromonosporaceae; g__Actinoplanes; s__unclassified	1	0	0	0	0	0	0	0	0	0	0	0	1	1	0	0	0	0	0	0	0	1	0	0	0	0	0	0	0	0
OTU_10511	d__Bacteria; p__unclassified; c__unclassified; o__unclassified; f__unclassified; g__unclassified; s__unclassified	0	0	0	0	0	0	1	0	0	1	0	0	0	0	0	0	0	0	0	0	0	0	0	0	0	0	0	0	0	0
OTU_10513	d__Bacteria; p__unclassified; c__unclassified; o__unclassified; f__unclassified; g__unclassified; s__unclassified	1	0	0	0	0	0	0	0	0	0	0	0	0	0	0	0	0	0	0	0	0	0	0	1	0	0	0	0	1	0
OTU_10515	d__Bacteria; p__Actinobacteria; c__unclassified; o__Streptomycetales; f__Streptomycetaceae; g__unclassified; s__unclassified	1	0	2	0	0	0	1	0	0	0	0	0	0	0	0	0	0	0	1	0	0	0	0	0	1	0	2	1	0	0
OTU_10519	d__Bacteria; p__Actinobacteria; c__unclassified; o__Streptomycetales; f__Streptomycetaceae; g__unclassified; s__unclassified	1	0	0	0	0	0	0	0	0	0	0	0	0	0	0	0	0	0	0	0	0	0	0	0	0	0	0	0	0	0
OTU_10520	d__Bacteria; p__Proteobacteria; c__Alphaproteobacteria; o__Rhodospirillales; f__Acetobacteraceae; g__unclassified; s__unclassified	1	1	0	0	0	0	0	0	0	1	0	0	0	0	0	1	0	0	0	0	0	0	0	0	0	0	0	0	1	1
OTU_10521	d__Bacteria; p__Proteobacteria; c__Alphaproteobacteria; o__Rhizobiales; f__Bradyrhizobiaceae; g__unclassified; s__unclassified	2	0	0	0	0	0	0	0	0	0	0	0	0	0	0	0	0	0	0	0	0	0	0	0	0	0	0	0	0	0
OTU_10522	d__Bacteria; p__Proteobacteria; c__Betaproteobacteria; o__Burkholderiales; f__Burkholderiaceae; g__unclassified; s__unclassified	1	0	0	0	0	0	0	0	0	0	0	0	0	0	0	0	0	0	0	0	0	0	0	0	0	0	0	0	0	0
OTU_10524	Unassigned	2	0	0	0	0	0	0	0	0	0	0	0	0	0	0	0	1	0	1	0	0	0	0	0	0	1	0	0	1	0
OTU_10526	Unassigned	1	0	0	0	0	0	0	0	0	1	0	0	0	0	0	0	0	0	0	0	0	0	0	0	0	0	0	0	0	0
OTU_10527	Unassigned	1	0	0	0	0	0	0	0	0	0	0	0	0	0	0	0	0	0	0	0	0	0	0	0	0	0	0	0	0	0
OTU_10529	d__Bacteria; p__Planctomycetes; c__Planctomycetia; o__Planctomycetales; f__unclassified; g__unclassified; s__unclassified	0	0	0	0	0	1	0	0	0	0	0	0	0	0	0	0	0	0	0	0	0	0	0	0	0	0	0	0	0	0
OTU_1053	d__Bacteria; p__Planctomycetes; c__Planctomycetia; o__Planctomycetales; f__Isosphaeraceae; g__Paludisphaera; s__unclassified	0	0	0	0	0	0	0	0	0	0	0	0	0	6	3	0	0	5	0	0	3	0	2	2	0	0	0	0	0	0
OTU_10530	d__Bacteria; p__Actinobacteria; c__unclassified; o__Micromonosporales; f__Micromonosporaceae; g__Actinoplanes; s__unclassified	1	0	0	0	0	0	0	0	0	1	0	0	0	0	0	0	0	0	0	0	0	0	0	0	0	0	0	0	0	0
OTU_10534	d__Bacteria; p__Actinobacteria; c__unclassified; o__Streptomycetales; f__Streptomycetaceae; g__unclassified; s__unclassified	1	0	0	0	0	0	0	0	1	0	0	0	0	0	0	0	0	0	0	1	0	0	0	0	0	0	0	0	0	0
OTU_10535	d__Bacteria; p__Planctomycetes; c__unclassified; o__unclassified; f__unclassified; g__unclassified; s__unclassified	0	0	0	1	0	0	0	0	0	0	0	0	0	0	0	0	0	0	0	0	0	0	0	0	0	0	0	0	0	0
OTU_10538	d__Bacteria; p__Proteobacteria; c__Gammaproteobacteria; o__Pseudomonadales; f__Pseudomonadaceae; g__unclassified; s__unclassified	2	0	0	0	0	0	0	1	0	1	0	0	0	0	0	0	0	0	0	0	0	0	0	0	0	0	0	0	2	0
OTU_1054	d__Bacteria; p__unclassified; c__unclassified; o__unclassified; f__unclassified; g__unclassified; s__unclassified	7	0	0	0	0	2	0	5	2	7	0	0	0	0	1	9	0	0	0	0	0	0	0	0	0	0	0	0	0	0
OTU_10541	d__Bacteria; p__Planctomycetes; c__Planctomycetia; o__Planctomycetales; f__unclassified; g__unclassified; s__unclassified	0	0	0	0	0	0	0	0	0	1	0	0	0	0	0	1	0	0	0	0	0	0	0	0	0	1	0	0	0	0
OTU_10543	d__Bacteria; p__unclassified; c__unclassified; o__unclassified; f__unclassified; g__unclassified; s__unclassified	1	0	0	1	0	0	2	0	0	0	0	0	0	0	0	0	0	0	0	0	0	0	0	0	0	0	0	0	0	0
OTU_10545	d__Bacteria; p__Actinobacteria; c__Rubrobacteria; o__Rubrobacterales; f__Rubrobacteraceae; g__unclassified; s__unclassified	1	0	0	0	0	0	0	0	0	0	0	0	0	0	0	0	0	0	0	0	0	0	0	0	0	0	0	0	0	0
OTU_10546	d__Bacteria; p__unclassified; c__unclassified; o__unclassified; f__unclassified; g__unclassified; s__unclassified	1	0	0	0	0	0	0	0	0	0	0	0	0	0	0	0	0	0	0	0	0	0	0	0	0	0	0	0	0	0
OTU_10547	d__Bacteria; p__Cyanobacteria; c__Gloeobacteria; o__Gloeobacterales; f__Gloeobacteraceae; g__unclassified; s__unclassified	0	0	0	0	0	0	0	0	0	0	1	0	0	0	0	1	0	0	0	0	0	0	0	1	0	0	0	0	0	0
OTU_1055	d__Bacteria; p__unclassified; c__unclassified; o__unclassified; f__unclassified; g__unclassified; s__unclassified	7	9	9	17	8	4	8	6	4	15	4	6	1	1	3	20	11	11	0	5	5	4	6	8	3	7	0	1	4	8
OTU_10551	Unassigned	1	0	0	0	0	0	0	0	0	0	0	0	0	0	0	0	0	0	0	0	0	0	0	0	0	0	0	0	0	0
OTU_10553	Unassigned	1	0	0	0	0	0	0	0	0	0	0	0	0	0	0	0	0	0	0	0	0	0	0	0	2	0	0	0	0	0
OTU_10556	Unassigned	3	0	0	0	0	0	0	2	0	0	0	0	0	0	0	0	0	0	0	0	0	0	0	0	0	0	0	0	0	0
OTU_10560	d__Bacteria; p__Planctomycetes; c__Planctomycetia; o__Planctomycetales; f__unclassified; g__unclassified; s__unclassified	1	0	0	0	0	0	0	0	0	0	0	0	0	0	0	0	0	0	0	0	0	0	0	0	0	0	0	0	0	0
OTU_10561	Unassigned	1	0	0	0	0	0	0	0	0	0	0	0	0	0	0	0	0	0	1	0	0	1	2	0	0	0	1	1	2	0
OTU_10562	Unassigned	1	0	0	0	0	0	0	1	0	1	0	0	0	0	0	0	1	0	0	0	0	0	0	0	0	0	0	0	0	0
OTU_10563	d__Bacteria; p__Actinobacteria; c__unclassified; o__Pseudonocardiales; f__Pseudonocardiaceae; g__unclassified; s__unclassified	2	0	0	0	0	0	0	0	0	0	0	0	0	0	0	1	0	0	0	0	0	0	0	0	0	0	1	0	0	0
OTU_10564	d__Bacteria; p__Actinobacteria; c__unclassified; o__Streptomycetales; f__Streptomycetaceae; g__unclassified; s__unclassified	1	2	0	0	0	0	2	0	0	0	1	0	0	0	0	0	0	0	0	0	0	0	0	0	0	0	1	0	0	0
OTU_10567	Unassigned	1	0	0	0	0	0	0	0	0	0	0	0	0	0	0	0	0	0	0	0	0	0	0	0	0	0	0	0	0	0
OTU_10568	Unassigned	1	0	0	0	0	0	0	0	0	2	2	0	0	0	0	0	1	0	0	0	0	0	0	0	0	0	0	0	0	0
OTU_1057	Unassigned	6	11	6	1	0	10	4	10	6	6	7	5	9	1	0	5	12	0	1	0	1	2	2	3	6	2	8	6	7	2
OTU_10570	Unassigned	1	0	0	0	0	0	0	0	0	0	0	0	0	0	0	0	0	0	0	0	0	0	0	0	0	0	0	0	0	0
OTU_10572	d__Bacteria; p__Planctomycetes; c__Planctomycetia; o__Planctomycetales; f__Isosphaeraceae; g__unclassified; s__unclassified	1	0	0	0	0	0	0	0	0	0	0	0	0	0	0	1	0	0	0	0	0	0	0	0	0	0	0	0	0	0
OTU_10575	Unassigned	1	0	0	0	1	0	2	0	0	0	0	2	1	0	0	1	0	0	2	1	0	0	0	0	0	0	2	0	0	0
OTU_10576	d__Bacteria; p__unclassified; c__unclassified; o__unclassified; f__unclassified; g__unclassified; s__unclassified	1	0	0	0	0	0	0	0	0	0	0	0	0	0	0	1	0	0	0	0	0	0	0	0	0	0	0	0	0	0
OTU_10577	d__Bacteria; p__Planctomycetes; c__Planctomycetia; o__Planctomycetales; f__Isosphaeraceae; g__unclassified; s__unclassified	0	0	0	0	1	0	0	0	0	0	0	0	0	0	0	0	2	0	0	0	0	0	0	0	0	0	0	1	0	0
OTU_10578	d__Bacteria; p__Actinobacteria; c__unclassified; o__Streptomycetales; f__Streptomycetaceae; g__unclassified; s__unclassified	1	0	0	0	0	0	0	0	0	0	0	0	1	0	0	0	0	0	0	0	0	0	0	0	0	0	0	1	0	0
OTU_1058	d__Bacteria; p__Actinobacteria; c__unclassified; o__unclassified; f__unclassified; g__unclassified; s__unclassified	1	2	4	0	1	5	2	5	4	1	1	9	6	1	0	4	13	4	5	0	4	13	0	4	7	1	6	13	1	0
OTU_10585	Unassigned	22	34	0	0	26	5	5	11	0	11	1	0	3	0	0	10	4	0	0	0	0	0	0	0	0	1	0	0	1	0
OTU_10586	d__Bacteria; p__Planctomycetes; c__Planctomycetia; o__Planctomycetales; f__unclassified; g__unclassified; s__unclassified	0	0	0	1	0	1	0	0	0	0	0	0	0	0	0	0	3	0	0	0	0	0	0	0	0	0	1	0	0	0
OTU_10587	d__Bacteria; p__Proteobacteria; c__unclassified; o__unclassified; f__unclassified; g__unclassified; s__unclassified	1	0	0	0	0	1	0	0	0	0	0	0	0	0	0	0	0	0	0	0	0	0	0	0	0	0	0	0	0	0
OTU_10588	d__Bacteria; p__Proteobacteria; c__Alphaproteobacteria; o__Rhizobiales; f__Bradyrhizobiaceae; g__unclassified; s__unclassified	2	0	0	0	0	0	0	0	0	0	0	0	0	0	0	0	0	0	0	0	0	0	0	0	0	0	0	0	0	0
OTU_1059	d__Bacteria; p__Actinobacteria; c__unclassified; o__Streptomycetales; f__Streptomycetaceae; g__unclassified; s__unclassified	1	1	3	5	3	3	2	7	3	3	5	8	12	0	0	5	13	0	0	9	1	1	0	0	0	3	1	9	12	2
OTU_10592	d__Bacteria; p__Firmicutes; c__Bacilli; o__Bacillales; f__Paenibacillaceae; g__unclassified; s__unclassified	1	0	0	0	0	0	0	0	0	0	1	0	0	0	0	0	0	0	0	0	0	0	0	0	0	0	0	0	0	1
OTU_106	d__Bacteria; p__Planctomycetes; c__Planctomycetia; o__Planctomycetales; f__Isosphaeraceae; g__unclassified; s__unclassified	5	0	4	7	0	0	5	5	13	5	8	37	14	27	36	0	17	12	15	27	37	35	105	63	5	4	2	18	46	23
OTU_1060	d__Bacteria; p__Actinobacteria; c__unclassified; o__Streptomycetales; f__Streptomycetaceae; g__unclassified; s__unclassified	0	0	0	0	0	0	0	0	0	0	0	0	0	0	0	0	0	15	0	0	0	0	0	0	0	0	0	0	0	0
OTU_10602	Unassigned	3	0	0	0	0	0	2	0	0	0	0	0	0	0	0	0	0	0	0	0	0	0	0	0	0	0	0	0	0	0
OTU_10604	Unassigned	0	0	0	0	0	0	0	0	0	0	0	0	0	0	0	1	0	0	0	0	0	0	0	0	0	0	0	0	0	0
OTU_10605	d__Bacteria; p__Proteobacteria; c__Alphaproteobacteria; o__Rhodospirillales; f__Acetobacteraceae; g__unclassified; s__unclassified	3	0	0	0	0	0	0	0	0	0	0	0	0	0	0	0	0	0	0	0	0	0	0	0	0	0	0	0	0	0
OTU_10606	d__Bacteria; p__Proteobacteria; c__Alphaproteobacteria; o__Rhizobiales; f__Bradyrhizobiaceae; g__unclassified; s__unclassified	1	0	0	0	0	0	0	0	0	0	0	0	0	0	0	0	0	0	0	0	0	0	0	0	0	0	0	0	0	0
OTU_10608	Unassigned	39	81	1	7	75	17	47	71	1	48	48	3	7	0	0	36	34	0	0	3	0	0	0	0	0	4	11	1	8	6
OTU_1061	d__Bacteria; p__Proteobacteria; c__Gammaproteobacteria; o__Xanthomonadales; f__Xanthomonadaceae; g__unclassified; s__unclassified	0	0	0	0	0	0	0	0	0	0	0	0	0	0	0	0	0	0	0	0	0	0	0	0	0	0	0	0	0	0
OTU_10611	Unassigned	2	0	0	0	0	0	0	0	1	0	0	1	0	0	0	1	0	0	0	0	0	1	0	0	0	0	0	0	0	0
OTU_10613	Unassigned	0	0	0	0	0	0	0	0	0	0	0	0	0	0	0	0	0	0	0	0	0	0	0	0	0	1	0	0	0	0
OTU_10615	d__Bacteria; p__Proteobacteria; c__Alphaproteobacteria; o__Rhizobiales; f__Bradyrhizobiaceae; g__Bradyrhizobium; s__unclassified	1	0	0	0	0	0	0	0	0	0	0	0	0	0	0	0	0	0	0	0	0	0	0	0	0	0	0	0	0	0
OTU_10617	Unassigned	1	0	0	0	0	0	0	0	0	0	0	0	0	0	0	0	0	0	0	0	0	0	0	1	0	0	0	0	0	0
OTU_10619	d__Bacteria; p__Planctomycetes; c__Planctomycetia; o__Planctomycetales; f__Isosphaeraceae; g__unclassified; s__unclassified	0	0	0	0	0	0	0	0	0	1	0	0	0	0	0	0	0	0	0	0	0	1	0	0	0	0	0	0	0	0
OTU_1062	d__Bacteria; p__Firmicutes; c__Bacilli; o__Bacillales; f__Paenibacillaceae; g__unclassified; s__unclassified	5	7	0	7	14	6	4	8	0	7	9	2	5	0	0	10	6	0	0	0	0	1	6	0	0	1	2	0	2	0
OTU_10621	Unassigned	1	0	0	0	0	0	0	0	0	0	0	0	1	0	0	0	0	0	0	0	0	0	0	0	0	0	0	0	0	0
OTU_10623	Unassigned	1	0	0	0	0	0	0	0	0	0	0	0	0	0	0	0	0	0	0	0	0	0	0	0	0	0	0	0	0	0
OTU_10625	d__Bacteria; p__Cyanobacteria; c__Gloeobacteria; o__Gloeobacterales; f__Gloeobacteraceae; g__unclassified; s__unclassified	1	0	0	0	0	0	0	0	0	0	1	0	1	0	0	1	0	0	0	0	0	0	0	0	0	0	0	0	0	0
OTU_10626	d__Bacteria; p__Actinobacteria; c__unclassified; o__Micromonosporales; f__Micromonosporaceae; g__unclassified; s__unclassified	1	0	0	0	0	0	0	0	0	0	0	0	1	0	0	0	0	0	0	0	1	0	0	0	0	1	0	0	0	0
OTU_10628	d__Bacteria; p__unclassified; c__unclassified; o__unclassified; f__unclassified; g__unclassified; s__unclassified	2	0	0	0	0	0	0	0	1	0	0	0	1	0	0	0	0	0	1	0	0	0	0	0	0	0	0	0	0	0
OTU_1063	d__Bacteria; p__unclassified; c__unclassified; o__unclassified; f__unclassified; g__unclassified; s__unclassified	0	0	3	0	1	0	0	8	0	2	0	0	2	0	0	5	0	7	5	0	0	3	0	0	0	0	0	6	0	0
OTU_10633	d__Bacteria; p__Firmicutes; c__Bacilli; o__Bacillales; f__Paenibacillaceae; g__unclassified; s__unclassified	2	0	0	0	0	0	0	0	0	1	0	0	0	0	0	0	0	0	0	0	1	0	0	0	0	0	0	0	0	0
OTU_10635	d__Bacteria; p__Proteobacteria; c__Gammaproteobacteria; o__Xanthomonadales; f__Xanthomonadaceae; g__unclassified; s__unclassified	0	0	0	0	0	0	0	0	0	0	0	0	0	0	0	0	0	0	0	0	0	0	0	2	0	0	0	0	0	0
OTU_10637	Unassigned	1	0	0	0	0	0	0	0	0	0	0	0	0	0	0	0	0	0	0	0	0	0	0	0	0	0	0	0	0	0
OTU_1064	d__Bacteria; p__Actinobacteria; c__unclassified; o__Streptomycetales; f__Streptomycetaceae; g__unclassified; s__unclassified	1	7	4	0	11	8	2	7	1	10	3	4	11	1	0	13	7	0	0	1	0	1	0	7	4	2	6	1	3	3
OTU_10640	Unassigned	1	0	0	0	0	0	0	0	0	0	0	0	0	0	0	0	0	0	0	0	0	0	0	0	0	0	0	0	0	0
OTU_10642	Unassigned	2	0	0	1	0	1	1	0	0	0	0	0	0	0	0	1	0	0	0	0	0	0	0	0	0	0	0	0	0	0
OTU_10644	d__Bacteria; p__Actinobacteria; c__unclassified; o__Streptomycetales; f__Streptomycetaceae; g__unclassified; s__unclassified	1	1	0	0	1	0	0	0	0	0	1	0	0	0	0	0	0	0	0	0	0	0	0	0	0	0	0	0	0	0
OTU_10647	d__Bacteria; p__Actinobacteria; c__unclassified; o__Streptomycetales; f__Streptomycetaceae; g__Streptomyces; s__unclassified	0	1	0	0	0	0	0	1	0	0	0	0	0	0	0	0	0	0	0	0	0	1	1	0	0	0	0	0	0	1
OTU_10648	Unassigned	0	1	0	0	1	0	2	3	0	6	1	0	1	0	1	0	0	0	0	0	0	0	0	0	0	0	2	1	0	0
OTU_10649	d__Bacteria; p__unclassified; c__unclassified; o__unclassified; f__unclassified; g__unclassified; s__unclassified	0	2	0	0	0	1	1	0	0	0	0	0	0	0	0	0	0	0	0	0	0	0	0	0	0	0	0	0	0	0
OTU_10650	d__Bacteria; p__Actinobacteria; c__unclassified; o__unclassified; f__unclassified; g__unclassified; s__unclassified	0	2	0	0	0	0	0	0	0	0	0	0	0	0	0	0	0	0	0	0	0	0	0	0	0	0	0	0	0	0
OTU_10651	Unassigned	0	1	0	0	0	0	0	1	0	0	0	0	0	0	0	0	0	0	0	0	0	0	0	0	0	0	0	0	0	0
OTU_10652	d__Bacteria; p__Actinobacteria; c__unclassified; o__Micromonosporales; f__Micromonosporaceae; g__Actinoplanes; s__unclassified	0	0	0	0	0	1	0	0	0	0	0	0	0	0	0	0	0	0	0	0	0	0	0	0	0	0	0	0	1	0
OTU_1066	Unassigned	0	0	0	0	0	0	0	0	0	0	0	0	0	0	1	0	0	4	0	0	1	3	15	1	0	0	0	0	0	0
OTU_10660	d__Bacteria; p__Proteobacteria; c__Alphaproteobacteria; o__Rhizobiales; f__Bradyrhizobiaceae; g__unclassified; s__unclassified	0	0	0	0	0	0	0	0	0	0	0	0	1	0	0	0	1	0	0	0	0	0	0	0	0	0	1	0	0	0
OTU_10661	d__Bacteria; p__Planctomycetes; c__Planctomycetia; o__Planctomycetales; f__unclassified; g__unclassified; s__unclassified	0	1	0	0	0	0	0	0	0	0	0	0	0	0	0	0	0	0	0	0	0	0	0	0	0	0	0	0	0	0
OTU_10664	d__Bacteria; p__unclassified; c__unclassified; o__unclassified; f__unclassified; g__unclassified; s__unclassified	0	1	0	0	0	0	0	0	0	0	0	0	0	0	0	0	0	0	0	0	0	0	0	0	0	0	0	0	0	0
OTU_10665	Unassigned	0	2	0	0	0	0	0	0	0	0	0	0	0	0	0	0	1	0	0	0	0	0	0	0	0	0	1	0	0	0
OTU_10666	d__Bacteria; p__Proteobacteria; c__Gammaproteobacteria; o__Xanthomonadales; f__Xanthomonadaceae; g__unclassified; s__unclassified	1	1	0	0	0	0	0	0	0	0	0	0	0	0	0	0	0	0	0	0	0	0	0	0	0	0	0	0	0	0
OTU_10667	d__Bacteria; p__Planctomycetes; c__Planctomycetia; o__Planctomycetales; f__Gemmataceae; g__unclassified; s__unclassified	0	1	0	0	0	0	0	0	0	0	0	0	0	1	0	0	0	0	0	0	0	0	0	0	0	0	0	0	0	0
OTU_1067	d__Bacteria; p__Proteobacteria; c__unclassified; o__unclassified; f__unclassified; g__unclassified; s__unclassified	0	3	9	0	0	0	0	0	1	4	0	0	0	0	2	0	0	2	0	0	1	1	0	0	10	0	0	0	0	1
OTU_10670	d__Bacteria; p__Actinobacteria; c__unclassified; o__Streptomycetales; f__Streptomycetaceae; g__unclassified; s__unclassified	0	2	0	0	1	1	0	0	0	0	0	0	0	0	0	0	0	0	0	0	0	0	0	0	0	0	0	0	0	0
OTU_10671	Unassigned	0	2	1	0	1	0	0	0	0	0	0	0	0	0	0	0	0	0	0	0	0	0	0	0	0	0	0	0	1	0
OTU_10673	d__Bacteria; p__Actinobacteria; c__unclassified; o__Streptomycetales; f__Streptomycetaceae; g__unclassified; s__unclassified	0	0	0	0	0	0	0	0	0	0	0	0	0	0	0	0	0	0	0	0	0	0	0	0	0	0	0	0	1	0
OTU_10676	d__Bacteria; p__Actinobacteria; c__unclassified; o__Frankiales; f__Frankiaceae; g__unclassified; s__unclassified	0	1	0	0	0	0	0	0	0	0	0	0	0	0	0	0	0	0	0	0	0	0	0	0	0	0	0	0	0	0
OTU_10679	Unassigned	0	1	0	0	0	0	0	0	0	0	0	0	0	0	0	0	0	0	0	0	0	0	0	0	0	0	0	0	0	0
OTU_1068	d__Bacteria; p__Proteobacteria; c__Alphaproteobacteria; o__Caulobacterales; f__Caulobacteraceae; g__unclassified; s__unclassified	13	9	26	24	5	6	11	8	28	14	18	19	30	2	1	4	6	6	11	17	17	10	16	26	35	22	36	18	34	22
OTU_10680	d__Bacteria; p__Actinobacteria; c__unclassified; o__Streptomycetales; f__Streptomycetaceae; g__unclassified; s__unclassified	0	3	0	0	1	2	0	2	0	0	0	0	0	0	0	0	0	1	0	0	1	0	0	2	0	0	1	0	0	1
OTU_10681	d__Bacteria; p__Actinobacteria; c__unclassified; o__Pseudonocardiales; f__Pseudonocardiaceae; g__unclassified; s__unclassified	0	0	0	0	0	0	0	0	0	0	0	0	0	0	0	0	2	0	0	0	0	0	0	0	0	0	0	0	0	0
OTU_10684	Unassigned	0	3	0	1	0	0	0	1	0	0	1	0	0	0	0	1	0	0	0	0	0	0	0	0	0	2	0	0	1	0
OTU_10685	d__Bacteria; p__Actinobacteria; c__unclassified; o__Streptomycetales; f__Streptomycetaceae; g__unclassified; s__unclassified	0	2	0	0	0	0	0	0	0	0	0	0	0	0	0	0	0	0	0	0	0	0	0	0	0	0	0	0	0	0
OTU_10688	Unassigned	0	1	0	0	0	0	0	0	0	0	0	0	0	0	0	0	0	0	0	0	0	0	0	0	0	0	0	0	0	0
OTU_1069	Unassigned	0	0	1	2	2	0	2	1	0	0	3	3	0	1	0	7	1	0	0	0	1	2	0	1	13	0	7	2	0	3
OTU_10693	d__Bacteria; p__unclassified; c__unclassified; o__unclassified; f__unclassified; g__unclassified; s__unclassified	0	1	0	0	0	0	0	0	0	1	0	0	2	0	0	0	0	0	0	0	0	0	0	0	0	0	1	0	0	0
OTU_10694	Unassigned	0	2	0	0	2	3	0	4	0	0	1	0	0	0	0	1	0	0	0	0	0	0	0	0	0	0	0	0	0	0
OTU_10695	d__Bacteria; p__Actinobacteria; c__unclassified; o__Streptomycetales; f__Streptomycetaceae; g__unclassified; s__unclassified	0	2	0	0	0	0	0	0	0	0	0	0	1	0	0	0	0	0	0	0	0	0	0	0	0	0	0	1	0	0
OTU_10696	Unassigned	0	1	0	0	0	0	0	1	0	2	0	0	0	0	0	0	1	0	0	0	0	0	0	0	0	0	0	0	0	0
OTU_10697	Unassigned	0	1	0	0	0	0	0	0	0	0	0	0	0	0	0	0	0	0	0	0	0	0	0	0	0	0	0	0	0	0
OTU_10698	Unassigned	5	16	0	3	27	12	12	28	3	14	15	1	0	0	0	11	11	0	1	3	0	0	0	0	0	4	7	0	2	5
OTU_10699	Unassigned	0	4	1	0	1	1	1	2	0	0	0	0	1	0	0	0	3	0	0	0	0	0	1	0	0	0	0	1	0	0
OTU_107	Unassigned	7	20	230	116	8	11	17	16	39	27	16	84	76	14	2	25	24	10	33	94	23	15	36	19	36	23	80	80	53	13
OTU_1070	d__Bacteria; p__unclassified; c__unclassified; o__unclassified; f__unclassified; g__unclassified; s__unclassified	0	0	0	0	0	1	0	0	0	0	0	0	0	0	0	0	0	0	0	0	0	3	1	0	7	0	0	0	0	0
OTU_10702	d__Bacteria; p__Actinobacteria; c__unclassified; o__unclassified; f__unclassified; g__unclassified; s__unclassified	0	1	0	0	0	0	0	1	0	0	0	0	0	0	0	0	0	0	0	0	0	0	0	0	0	0	0	0	0	0
OTU_10704	Unassigned	0	1	0	0	0	0	0	0	0	0	0	0	0	0	0	0	0	0	0	0	0	0	0	0	0	0	0	0	0	0
OTU_10705	Unassigned	0	1	0	0	0	1	0	1	0	1	0	0	0	0	0	0	0	0	0	0	0	0	0	0	0	0	0	0	0	0
OTU_10707	d__Bacteria; p__Planctomycetes; c__Planctomycetia; o__Planctomycetales; f__Isosphaeraceae; g__unclassified; s__unclassified	0	2	0	0	0	0	0	0	0	0	0	0	0	0	0	0	0	0	0	0	0	0	0	0	0	0	0	0	0	0
OTU_10708	Unassigned	0	1	0	0	0	1	1	0	0	1	0	0	0	0	0	0	0	0	0	0	0	0	0	0	0	0	0	0	0	0
OTU_1071	d__Bacteria; p__Proteobacteria; c__Alphaproteobacteria; o__Rhodospirillales; f__Acetobacteraceae; g__unclassified; s__unclassified	7	6	7	3	6	1	6	9	3	4	12	0	12	0	0	5	7	0	1	3	0	5	5	5	2	10	19	3	7	1
OTU_10711	d__Bacteria; p__unclassified; c__unclassified; o__unclassified; f__unclassified; g__unclassified; s__unclassified	0	2	0	0	0	0	0	0	0	0	0	0	0	0	0	0	0	0	0	0	0	0	0	0	0	0	0	0	0	0
OTU_10712	d__Bacteria; p__Actinobacteria; c__unclassified; o__Streptomycetales; f__Streptomycetaceae; g__unclassified; s__unclassified	0	0	0	0	0	0	0	0	0	0	0	0	0	0	0	0	0	0	0	0	0	0	0	0	0	0	0	0	0	0
OTU_10713	Unassigned	0	1	0	0	0	0	0	0	0	0	0	0	0	0	0	0	0	0	0	0	0	0	0	0	0	0	0	0	0	0
OTU_10714	d__Bacteria; p__Planctomycetes; c__Planctomycetia; o__Planctomycetales; f__unclassified; g__unclassified; s__unclassified	1	1	0	0	0	0	0	0	0	0	0	0	0	0	0	0	0	0	0	0	0	0	0	0	0	0	0	0	0	3
OTU_10715	d__Bacteria; p__Actinobacteria; c__unclassified; o__Streptomycetales; f__Streptomycetaceae; g__unclassified; s__unclassified	0	1	0	0	0	0	0	0	0	0	0	0	0	0	0	0	0	0	0	0	0	0	0	0	0	0	0	0	0	0
OTU_10716	Unassigned	0	2	0	0	0	0	0	0	0	0	0	0	0	0	0	0	0	0	0	0	0	0	0	0	0	0	0	0	0	0
OTU_10719	Unassigned	1	1	0	0	0	1	0	0	0	0	0	0	0	0	0	0	0	0	0	0	0	0	0	0	0	0	0	0	0	0
OTU_1072	d__Bacteria; p__unclassified; c__unclassified; o__unclassified; f__unclassified; g__unclassified; s__unclassified	2	0	3	2	0	1	0	1	4	2	4	5	6	9	4	3	0	3	8	4	0	6	8	1	3	2	4	5	5	1
OTU_10720	Unassigned	0	1	0	0	0	0	0	0	0	0	0	0	0	0	0	0	0	0	0	0	0	0	0	0	0	0	0	0	0	0
OTU_10722	d__Bacteria; p__Planctomycetes; c__unclassified; o__unclassified; f__unclassified; g__unclassified; s__unclassified	0	2	0	0	0	0	0	0	1	0	0	0	0	0	0	0	0	0	0	0	0	0	0	0	0	0	0	0	0	0
OTU_10727	d__Bacteria; p__Planctomycetes; c__Planctomycetia; o__Planctomycetales; f__unclassified; g__unclassified; s__unclassified	0	2	0	0	0	0	0	0	0	0	0	0	2	0	0	0	0	0	0	0	0	0	0	0	0	0	0	0	0	0
OTU_10729	d__Bacteria; p__Planctomycetes; c__Planctomycetia; o__Planctomycetales; f__unclassified; g__unclassified; s__unclassified	0	2	0	1	0	0	0	0	1	0	2	2	0	0	0	0	1	0	0	0	0	0	0	0	0	0	0	0	0	0
OTU_1073	d__Bacteria; p__Planctomycetes; c__Planctomycetia; o__Planctomycetales; f__unclassified; g__unclassified; s__unclassified	4	0	2	1	0	1	1	0	1	2	2	1	0	0	11	0	3	7	2	20	6	5	11	7	0	7	5	9	6	9
OTU_10731	Unassigned	0	0	0	0	0	2	0	0	0	0	0	0	0	0	0	0	0	0	0	0	0	0	0	0	0	0	0	0	0	0
OTU_10733	Unassigned	0	0	0	0	1	0	0	1	0	0	0	0	0	0	0	0	0	0	0	0	0	0	0	0	0	0	0	0	0	0
OTU_10734	d__Bacteria; p__Actinobacteria; c__unclassified; o__Streptomycetales; f__Streptomycetaceae; g__unclassified; s__unclassified	0	3	0	0	0	0	0	0	0	3	1	0	1	0	0	0	0	0	0	0	0	0	0	0	0	0	0	0	0	0
OTU_10735	Unassigned	0	0	0	2	0	0	0	1	1	1	0	0	0	0	0	0	0	0	0	0	0	0	0	0	0	0	0	0	0	0
OTU_10736	d__Bacteria; p__Firmicutes; c__Bacilli; o__Bacillales; f__Paenibacillaceae; g__unclassified; s__unclassified	0	2	0	0	0	0	0	0	0	0	0	0	0	0	0	0	0	0	0	0	0	0	0	0	0	0	0	0	0	0
OTU_10737	d__Bacteria; p__unclassified; c__unclassified; o__unclassified; f__unclassified; g__unclassified; s__unclassified	0	2	0	0	0	0	0	0	0	0	0	0	0	0	0	0	0	0	0	0	0	0	0	0	0	0	0	0	1	0
OTU_10739	d__Bacteria; p__Proteobacteria; c__Alphaproteobacteria; o__Rhodospirillales; f__Acetobacteraceae; g__unclassified; s__unclassified	0	0	0	0	1	0	0	0	0	1	1	0	0	0	0	2	0	0	0	0	0	0	0	0	0	2	1	0	0	0
OTU_1074	Unassigned	0	1	2	1	0	0	0	1	0	0	0	0	0	0	0	0	0	0	0	0	0	0	0	0	0	0	0	0	1	0
OTU_10742	Unassigned	0	2	0	0	0	0	0	0	0	0	0	0	0	0	0	0	0	0	0	0	0	0	0	0	0	0	0	0	0	0
OTU_10743	Unassigned	1	1	0	0	0	0	0	0	0	0	0	0	0	0	0	0	0	0	0	0	1	0	0	3	0	0	0	1	0	0
OTU_10747	Unassigned	0	2	0	0	1	0	0	0	0	0	0	0	0	0	0	0	0	0	0	0	0	0	0	0	0	1	0	0	0	0
OTU_10749	Unassigned	0	1	0	0	1	0	0	0	0	1	1	0	0	0	0	0	0	0	0	0	0	0	0	0	0	0	0	0	1	0
OTU_1075	Unassigned	1	9	2	0	6	15	6	6	1	7	1	3	2	0	0	13	10	0	0	0	0	0	0	0	0	0	0	2	2	6
OTU_10750	d__Bacteria; p__Actinobacteria; c__unclassified; o__Streptomycetales; f__Streptomycetaceae; g__unclassified; s__unclassified	0	3	0	0	1	0	0	0	1	2	1	0	0	0	0	2	1	0	0	0	0	0	0	0	0	0	0	0	0	0
OTU_10752	d__Bacteria; p__unclassified; c__unclassified; o__unclassified; f__unclassified; g__unclassified; s__unclassified	0	2	0	0	0	0	1	0	0	0	0	0	0	0	0	0	0	0	0	0	0	0	0	0	0	0	0	0	0	0
OTU_10754	d__Bacteria; p__Proteobacteria; c__Gammaproteobacteria; o__Xanthomonadales; f__Xanthomonadaceae; g__unclassified; s__unclassified	0	1	0	0	0	0	0	0	0	0	0	0	0	0	0	0	0	0	0	0	0	0	0	0	0	0	0	0	0	0
OTU_10755	d__Bacteria; p__Actinobacteria; c__unclassified; o__Streptomycetales; f__Streptomycetaceae; g__unclassified; s__unclassified	0	2	0	0	0	0	0	0	0	0	0	0	0	0	0	0	1	0	0	0	0	0	0	0	0	0	0	0	0	0
OTU_10756	Unassigned	0	1	0	0	1	0	0	2	0	0	1	0	0	0	0	0	0	0	0	0	0	0	0	0	0	1	0	0	0	0
OTU_10757	Unassigned	0	1	0	0	0	1	0	0	0	0	0	0	0	0	0	0	0	0	0	0	0	0	0	0	0	0	0	0	0	0
OTU_10758	d__Bacteria; p__Planctomycetes; c__Planctomycetia; o__Planctomycetales; f__unclassified; g__unclassified; s__unclassified	0	2	0	0	0	0	0	2	0	0	0	0	0	0	0	1	0	0	0	0	0	0	0	0	0	0	1	0	0	0
OTU_10759	d__Bacteria; p__Planctomycetes; c__unclassified; o__unclassified; f__unclassified; g__unclassified; s__unclassified	0	1	0	0	0	0	0	0	0	0	0	0	0	0	0	0	0	0	0	0	0	0	0	0	0	0	0	0	0	0
OTU_1076	d__Bacteria; p__Proteobacteria; c__Alphaproteobacteria; o__unclassified; f__unclassified; g__unclassified; s__unclassified	8	8	1	9	2	10	13	5	2	8	6	1	2	0	0	3	1	0	0	15	1	1	0	1	0	14	9	0	5	7
OTU_10761	d__Bacteria; p__Planctomycetes; c__unclassified; o__unclassified; f__unclassified; g__unclassified; s__unclassified	0	0	0	0	0	0	0	0	0	0	0	0	1	0	0	1	0	0	0	1	0	0	0	2	0	0	0	0	0	0
OTU_10763	Unassigned	0	0	0	0	0	0	0	0	0	0	0	0	0	0	0	0	0	0	0	0	0	0	0	0	0	1	0	0	0	0
OTU_10764	d__Bacteria; p__Actinobacteria; c__unclassified; o__Streptomycetales; f__Streptomycetaceae; g__unclassified; s__unclassified	0	1	0	2	0	0	2	0	0	0	0	0	0	0	0	0	0	0	0	0	0	0	0	0	0	0	0	0	0	0
OTU_10766	d__Bacteria; p__Planctomycetes; c__Planctomycetia; o__Planctomycetales; f__Isosphaeraceae; g__unclassified; s__unclassified	0	2	0	0	0	0	0	0	0	1	0	0	0	0	0	0	0	0	0	0	0	0	0	0	0	0	0	0	0	0
OTU_10767	Unassigned	0	1	0	0	0	0	0	0	0	0	0	1	0	2	0	0	0	1	0	0	1	1	0	0	0	0	0	0	0	0
OTU_10768	Unassigned	0	1	0	0	0	0	0	0	0	0	0	0	0	0	0	1	0	0	0	0	0	0	0	0	0	0	0	0	1	0
OTU_1077	d__Bacteria; p__unclassified; c__unclassified; o__unclassified; f__unclassified; g__unclassified; s__unclassified	0	0	0	0	0	0	0	10	0	0	0	0	0	0	0	0	0	0	0	0	0	0	0	0	0	0	0	0	0	0
OTU_10771	d__Bacteria; p__Proteobacteria; c__Alphaproteobacteria; o__Caulobacterales; f__Caulobacteraceae; g__unclassified; s__unclassified	0	2	0	0	0	0	0	0	0	0	3	0	1	0	0	0	0	0	1	0	0	1	1	0	0	1	0	0	0	0
OTU_10775	d__Bacteria; p__Proteobacteria; c__Gammaproteobacteria; o__Xanthomonadales; f__Xanthomonadaceae; g__unclassified; s__unclassified	0	1	0	0	0	0	0	0	0	0	0	0	1	0	0	0	0	0	0	2	0	0	1	0	0	0	0	0	0	0
OTU_10776	d__Bacteria; p__Actinobacteria; c__unclassified; o__Streptomycetales; f__Streptomycetaceae; g__unclassified; s__unclassified	0	0	0	0	0	0	0	0	0	0	0	0	0	0	0	0	0	0	0	0	0	0	0	0	0	2	0	0	0	0
OTU_10778	d__Bacteria; p__Actinobacteria; c__Rubrobacteria; o__Rubrobacterales; f__Rubrobacteraceae; g__unclassified; s__unclassified	0	1	0	0	0	0	0	0	0	0	1	0	0	0	0	0	0	0	0	0	0	0	0	0	0	0	0	0	0	0
OTU_1078	d__Bacteria; p__Actinobacteria; c__unclassified; o__Streptomycetales; f__Streptomycetaceae; g__unclassified; s__unclassified	0	0	0	0	0	0	0	0	0	0	0	0	0	0	13	0	0	2	0	0	3	0	1	0	0	0	0	0	0	0
OTU_10780	Unassigned	0	0	0	0	0	0	0	0	0	0	0	0	0	0	0	0	2	0	0	0	0	0	0	0	0	0	0	0	0	0
OTU_10783	Unassigned	0	1	0	1	0	0	0	0	0	0	0	0	0	0	0	0	0	0	0	0	0	0	0	0	0	0	0	0	0	0
OTU_10784	d__Bacteria; p__Proteobacteria; c__Alphaproteobacteria; o__Rhizobiales; f__Bradyrhizobiaceae; g__unclassified; s__unclassified	0	2	0	0	0	0	0	0	0	0	0	0	0	0	0	0	0	0	0	0	0	0	0	0	0	1	0	0	0	0
OTU_10785	d__Bacteria; p__Actinobacteria; c__unclassified; o__Streptomycetales; f__Streptomycetaceae; g__unclassified; s__unclassified	0	0	0	0	0	0	1	0	0	0	0	0	1	0	0	0	0	0	0	0	0	0	0	0	0	0	0	0	0	0
OTU_10786	d__Bacteria; p__unclassified; c__unclassified; o__unclassified; f__unclassified; g__unclassified; s__unclassified	0	1	0	0	0	0	0	1	0	0	0	0	1	0	0	0	1	0	0	0	0	0	0	0	0	0	0	0	0	0
OTU_10789	d__Bacteria; p__Proteobacteria; c__Gammaproteobacteria; o__Xanthomonadales; f__Xanthomonadaceae; g__unclassified; s__unclassified	0	1	0	0	0	1	0	0	0	0	0	0	0	0	0	0	0	0	0	0	0	0	0	0	0	1	0	0	0	0
OTU_1079	Unassigned	1	0	6	3	3	4	5	0	1	2	1	3	8	4	8	10	3	3	0	1	9	5	1	7	9	2	12	12	0	2
OTU_10790	d__Bacteria; p__Proteobacteria; c__Alphaproteobacteria; o__Caulobacterales; f__Caulobacteraceae; g__unclassified; s__unclassified	0	1	0	0	0	0	0	0	0	0	0	0	0	0	0	0	0	0	0	0	0	0	0	0	0	0	0	0	0	0
OTU_10791	d__Bacteria; p__unclassified; c__unclassified; o__unclassified; f__unclassified; g__unclassified; s__unclassified	0	1	0	1	0	0	0	0	0	0	0	0	0	0	0	1	0	0	0	0	0	0	0	0	0	2	0	0	0	0
OTU_10792	d__Bacteria; p__Proteobacteria; c__Alphaproteobacteria; o__Rhizobiales; f__Bradyrhizobiaceae; g__unclassified; s__unclassified	0	0	0	0	0	0	0	0	0	0	0	0	0	0	1	0	0	0	0	0	0	0	0	0	0	0	1	0	0	0
OTU_10793	d__Bacteria; p__Actinobacteria; c__unclassified; o__Streptomycetales; f__Streptomycetaceae; g__unclassified; s__unclassified	0	0	0	0	1	0	0	1	0	0	1	0	0	0	0	0	0	0	1	0	0	0	0	0	0	0	0	0	0	0
OTU_10794	d__Bacteria; p__Planctomycetes; c__Planctomycetia; o__Planctomycetales; f__Gemmataceae; g__unclassified; s__unclassified	0	1	0	0	0	1	0	0	0	0	0	0	0	0	0	0	0	0	0	0	0	0	0	0	0	0	0	0	0	0
OTU_10796	Unassigned	0	2	0	0	0	0	0	0	0	0	0	0	0	0	0	0	0	0	0	0	0	0	0	0	0	0	0	0	0	0
OTU_10798	d__Bacteria; p__Actinobacteria; c__unclassified; o__unclassified; f__unclassified; g__unclassified; s__unclassified	0	1	0	0	0	0	0	0	0	0	0	0	0	0	0	0	0	0	0	0	0	0	0	0	0	0	0	0	0	0
OTU_10799	d__Bacteria; p__Proteobacteria; c__Alphaproteobacteria; o__Rhodospirillales; f__Acetobacteraceae; g__unclassified; s__unclassified	0	1	0	0	0	0	0	0	0	0	0	0	0	0	0	0	0	0	0	0	0	0	0	0	0	0	0	0	0	0
OTU_108	d__Bacteria; p__Actinobacteria; c__unclassified; o__Frankiales; f__Frankiaceae; g__unclassified; s__unclassified	186	140	82	92	129	79	68	59	104	99	209	32	231	194	48	58	59	53	81	75	54	45	64	26	44	88	90	30	188	75
OTU_1080	d__Bacteria; p__Proteobacteria; c__Alphaproteobacteria; o__Rhodospirillales; f__Acetobacteraceae; g__unclassified; s__unclassified	11	3	1	8	7	4	5	3	12	1	0	2	2	0	0	3	2	0	0	8	6	12	0	2	6	8	4	0	0	0
OTU_10801	d__Bacteria; p__unclassified; c__unclassified; o__unclassified; f__unclassified; g__unclassified; s__unclassified	0	0	0	0	0	0	0	0	0	0	0	0	0	0	0	0	0	0	0	0	0	0	0	0	0	0	0	0	0	0
OTU_10803	d__Bacteria; p__Proteobacteria; c__Gammaproteobacteria; o__Xanthomonadales; f__Xanthomonadaceae; g__unclassified; s__unclassified	1	1	0	0	0	0	0	0	0	1	0	0	0	0	0	0	0	0	0	0	0	0	0	0	0	0	0	0	0	0
OTU_10804	d__Bacteria; p__Planctomycetes; c__Planctomycetia; o__Planctomycetales; f__unclassified; g__unclassified; s__unclassified	0	1	1	0	0	0	0	0	2	0	0	0	0	0	0	2	0	0	0	0	0	0	0	0	0	2	0	0	0	0
OTU_10805	Unassigned	2	5	0	0	3	0	1	1	1	2	2	1	2	0	0	1	2	0	0	0	0	0	0	2	0	0	2	0	1	0
OTU_10808	Unassigned	0	1	0	0	0	0	0	1	0	0	0	0	1	0	0	0	0	0	0	0	0	0	0	0	0	0	0	0	0	0
OTU_10810	Unassigned	0	1	0	0	1	4	1	1	0	2	0	0	1	0	0	1	3	0	1	0	0	2	0	1	0	0	0	0	2	2
OTU_10811	d__Bacteria; p__unclassified; c__unclassified; o__unclassified; f__unclassified; g__unclassified; s__unclassified	1	1	0	0	2	0	0	1	0	1	1	0	1	0	0	1	0	0	1	0	0	0	0	0	0	0	0	0	1	0
OTU_10812	d__Bacteria; p__Actinobacteria; c__unclassified; o__Pseudonocardiales; f__Pseudonocardiaceae; g__unclassified; s__unclassified	0	1	0	0	0	0	0	0	0	0	0	0	0	0	0	0	0	0	1	0	0	0	0	0	0	0	0	0	0	0
OTU_10817	d__Bacteria; p__Planctomycetes; c__Planctomycetia; o__Planctomycetales; f__unclassified; g__unclassified; s__unclassified	0	1	0	0	0	0	0	0	0	0	0	0	2	0	0	0	0	0	0	0	0	0	0	0	0	0	0	0	0	0
OTU_10818	d__Bacteria; p__Actinobacteria; c__unclassified; o__Streptomycetales; f__Streptomycetaceae; g__unclassified; s__unclassified	0	1	0	0	0	0	0	0	0	0	0	0	0	0	0	0	0	0	0	0	0	0	0	0	0	0	0	0	0	0
OTU_1082	Unassigned	1	2	0	4	6	5	1	2	6	4	0	1	0	2	3	2	7	0	6	22	11	10	10	2	5	7	1	10	2	0
OTU_10821	d__Bacteria; p__Proteobacteria; c__Gammaproteobacteria; o__Xanthomonadales; f__Xanthomonadaceae; g__unclassified; s__unclassified	0	3	0	0	3	0	0	2	0	2	1	0	0	0	0	0	0	0	0	0	0	0	0	0	0	0	0	0	0	1
OTU_10825	Unassigned	0	2	0	0	0	1	0	0	0	0	0	0	0	0	0	0	0	0	0	0	1	0	0	0	0	1	2	0	0	0
OTU_10828	Unassigned	0	2	0	0	0	0	0	0	0	0	0	0	0	0	0	0	0	0	0	0	0	0	0	0	0	0	0	1	0	0
OTU_10829	Unassigned	0	1	0	0	0	0	1	1	0	0	0	0	1	0	0	0	0	0	0	0	0	0	0	0	0	1	0	0	0	0
OTU_1083	Unassigned	0	0	3	0	0	0	0	0	0	0	0	2	1	1	0	0	0	0	0	0	14	0	0	0	0	0	1	1	1	2
OTU_10830	d__Bacteria; p__unclassified; c__unclassified; o__unclassified; f__unclassified; g__unclassified; s__unclassified	0	1	0	0	0	0	0	0	1	0	0	0	1	0	0	0	0	0	0	0	0	0	0	0	0	0	0	0	0	0
OTU_10831	d__Bacteria; p__Proteobacteria; c__Gammaproteobacteria; o__Pseudomonadales; f__Pseudomonadaceae; g__unclassified; s__unclassified	0	0	0	0	1	0	0	0	0	2	0	0	0	0	0	4	0	0	0	0	0	0	0	0	0	0	0	0	0	0
OTU_10832	d__Bacteria; p__Actinobacteria; c__unclassified; o__Micromonosporales; f__Micromonosporaceae; g__Actinoplanes; s__unclassified	0	1	0	0	0	0	0	0	1	0	0	0	0	0	0	0	0	0	1	0	0	0	0	0	0	0	0	0	2	0
OTU_10833	d__Bacteria; p__Planctomycetes; c__Planctomycetia; o__Planctomycetales; f__unclassified; g__unclassified; s__unclassified	0	0	0	0	0	0	0	0	0	0	1	0	0	0	0	0	1	0	0	0	0	0	0	0	0	0	0	0	0	0
OTU_10834	Unassigned	0	3	0	0	0	0	0	0	0	0	0	0	0	0	0	0	0	0	0	0	0	0	0	0	0	0	0	0	0	0
OTU_10835	d__Bacteria; p__Actinobacteria; c__unclassified; o__Streptomycetales; f__Streptomycetaceae; g__unclassified; s__unclassified	0	1	0	0	0	0	0	0	0	0	0	0	0	0	0	0	0	0	0	0	0	0	0	0	0	0	0	0	0	0
OTU_1084	d__Bacteria; p__Proteobacteria; c__Gammaproteobacteria; o__Xanthomonadales; f__Xanthomonadaceae; g__unclassified; s__unclassified	1	0	5	2	0	0	0	0	0	0	0	13	0	0	0	0	0	1	5	10	27	10	2	5	1	0	0	2	0	1
OTU_10840	Unassigned	0	1	0	0	0	0	0	0	0	0	0	0	1	0	0	0	0	0	0	0	0	0	0	0	0	0	1	0	1	0
OTU_10841	d__Bacteria; p__unclassified; c__unclassified; o__unclassified; f__unclassified; g__unclassified; s__unclassified	0	1	0	0	0	0	0	1	0	0	0	0	0	0	0	0	1	0	0	0	0	0	0	0	0	0	0	0	0	0
OTU_10842	d__Bacteria; p__Proteobacteria; c__Alphaproteobacteria; o__Rhizobiales; f__Rhizobiaceae; g__Sinorhizobium; s__unclassified	0	1	0	0	0	0	0	0	0	0	0	0	0	0	0	0	0	0	0	0	0	0	0	0	0	0	0	0	0	0
OTU_10845	Unassigned	0	1	0	0	0	0	0	0	0	0	0	0	0	0	0	0	0	0	0	0	0	0	0	0	0	0	0	0	0	0
OTU_10846	d__Bacteria; p__Proteobacteria; c__Betaproteobacteria; o__Burkholderiales; f__Comamonadaceae; g__unclassified; s__unclassified	1	0	0	0	0	0	0	0	0	0	0	0	0	0	0	0	0	0	0	0	0	0	0	0	0	0	0	0	0	0
OTU_10848	d__Bacteria; p__Actinobacteria; c__unclassified; o__Streptomycetales; f__Streptomycetaceae; g__unclassified; s__unclassified	0	1	0	0	0	0	0	0	0	0	0	0	0	0	0	1	0	0	0	0	0	0	0	0	0	0	0	0	0	0
OTU_10849	d__Bacteria; p__Actinobacteria; c__unclassified; o__Streptomycetales; f__Streptomycetaceae; g__unclassified; s__unclassified	0	2	0	0	0	0	0	0	0	0	0	0	0	0	0	0	0	0	0	0	0	0	1	0	0	0	0	0	0	0
OTU_1085	d__Bacteria; p__Proteobacteria; c__Alphaproteobacteria; o__Caulobacterales; f__Caulobacteraceae; g__unclassified; s__unclassified	1	0	4	0	0	0	0	0	1	3	0	2	0	5	0	0	0	0	1	0	12	0	0	3	1	0	0	0	4	1
OTU_10851	Unassigned	0	1	0	0	2	0	0	0	0	0	0	0	2	0	0	0	0	0	0	0	0	0	0	0	0	0	0	0	1	0
OTU_10853	Unassigned	0	2	0	0	0	0	0	0	0	0	0	0	0	0	0	0	0	0	0	0	0	0	0	0	0	0	0	0	0	0
OTU_10855	d__Bacteria; p__Actinobacteria; c__unclassified; o__Streptomycetales; f__Streptomycetaceae; g__unclassified; s__unclassified	0	1	0	0	0	0	0	0	0	0	0	0	0	0	0	0	0	0	0	0	0	0	0	0	0	0	0	0	0	0
OTU_10858	d__Bacteria; p__Actinobacteria; c__unclassified; o__Pseudonocardiales; f__Pseudonocardiaceae; g__unclassified; s__unclassified	0	0	0	0	1	0	0	0	0	0	0	0	0	0	0	0	0	0	0	0	0	0	0	0	0	0	0	0	0	0
OTU_1086	d__Bacteria; p__Actinobacteria; c__unclassified; o__Streptomycetales; f__Streptomycetaceae; g__unclassified; s__unclassified	13	5	0	11	8	4	4	4	4	9	2	1	11	0	0	3	2	0	1	7	0	0	2	0	0	10	6	0	10	0
OTU_10861	Unassigned	0	2	0	0	0	0	0	0	0	0	0	0	0	0	0	0	0	0	0	0	0	0	0	0	0	0	0	0	0	0
OTU_10863	Unassigned	0	0	0	0	0	0	0	0	0	0	0	0	0	0	1	0	0	0	0	0	0	0	0	0	0	0	0	0	0	0
OTU_10864	d__Bacteria; p__Actinobacteria; c__unclassified; o__Streptomycetales; f__Streptomycetaceae; g__unclassified; s__unclassified	0	1	0	0	0	0	0	0	0	0	0	0	0	0	0	1	0	0	0	0	0	0	0	0	0	0	0	0	0	0
OTU_10865	d__Bacteria; p__Actinobacteria; c__unclassified; o__Streptomycetales; f__Streptomycetaceae; g__Streptomyces; s__unclassified	0	0	0	0	0	0	0	0	0	0	0	0	0	0	0	0	0	0	0	0	0	0	1	0	0	0	2	1	0	0
OTU_10867	d__Bacteria; p__Planctomycetes; c__unclassified; o__unclassified; f__unclassified; g__unclassified; s__unclassified	0	1	0	0	0	0	0	0	0	0	0	0	0	0	0	0	0	0	0	0	0	0	0	0	0	0	0	0	0	0
OTU_10869	Unassigned	0	1	0	0	0	0	0	0	0	0	0	0	0	0	0	0	1	0	0	0	0	0	0	0	0	0	0	0	0	0
OTU_1087	Unassigned	7	0	0	2	0	0	0	1	0	1	0	0	1	0	0	0	0	0	0	0	1	0	2	2	0	4	0	0	2	0
OTU_10870	Unassigned	0	1	0	0	0	0	0	2	0	0	1	0	0	0	0	0	1	0	0	0	0	0	0	0	0	0	0	0	0	0
OTU_10871	d__Bacteria; p__Proteobacteria; c__Gammaproteobacteria; o__Xanthomonadales; f__Xanthomonadaceae; g__unclassified; s__unclassified	0	1	0	0	0	0	0	0	0	0	0	0	0	0	0	0	0	0	0	0	0	0	0	0	0	0	0	0	0	0
OTU_10873	Unassigned	0	0	0	0	0	0	0	0	0	0	0	0	0	0	0	0	0	0	1	0	0	0	0	0	0	0	0	0	0	0
OTU_10874	d__Bacteria; p__Actinobacteria; c__unclassified; o__Streptomycetales; f__Streptomycetaceae; g__unclassified; s__unclassified	0	1	0	0	0	0	0	0	0	0	0	0	0	0	0	0	0	0	0	0	0	0	0	0	0	0	0	0	0	0
OTU_10876	Unassigned	0	1	0	0	0	0	0	0	0	0	0	0	0	0	0	0	0	0	0	0	0	0	0	0	0	0	0	0	0	0
OTU_1088	d__Bacteria; p__Actinobacteria; c__unclassified; o__Streptomycetales; f__Streptomycetaceae; g__unclassified; s__unclassified	5	12	4	1	6	3	1	3	6	10	11	7	9	1	0	4	11	0	0	4	0	1	0	0	0	6	7	5	7	1
OTU_10882	d__Bacteria; p__unclassified; c__unclassified; o__unclassified; f__unclassified; g__unclassified; s__unclassified	0	1	0	0	0	0	0	0	0	0	0	0	1	0	0	0	1	0	0	0	0	0	0	0	0	0	0	0	0	1
OTU_10887	Unassigned	0	2	0	0	0	0	0	0	0	0	0	0	0	0	0	0	0	0	0	0	0	0	0	0	0	0	0	0	0	0
OTU_1089	d__Bacteria; p__unclassified; c__unclassified; o__unclassified; f__unclassified; g__unclassified; s__unclassified	0	13	0	0	0	0	0	0	0	2	8	0	0	0	0	1	2	0	0	0	0	0	0	0	0	0	0	0	2	0
OTU_10893	d__Bacteria; p__Proteobacteria; c__Alphaproteobacteria; o__Caulobacterales; f__Caulobacteraceae; g__Phenylobacterium; s__unclassified	0	1	0	0	0	0	0	0	0	0	0	0	0	0	0	0	0	0	0	0	0	0	0	0	0	0	0	0	0	0
OTU_10894	d__Bacteria; p__Proteobacteria; c__Gammaproteobacteria; o__Xanthomonadales; f__Xanthomonadaceae; g__unclassified; s__unclassified	0	3	0	0	0	0	0	0	0	0	0	0	0	0	0	0	0	0	0	0	0	0	0	0	0	0	0	0	0	0
OTU_10897	d__Bacteria; p__Proteobacteria; c__Gammaproteobacteria; o__Xanthomonadales; f__Xanthomonadaceae; g__unclassified; s__unclassified	0	0	0	0	1	0	0	0	0	0	0	0	0	0	0	0	0	0	0	0	0	0	0	1	0	0	0	0	0	0
OTU_10899	Unassigned	0	0	0	0	0	0	0	0	0	0	1	0	0	0	0	0	0	0	0	0	0	0	0	0	0	0	0	0	0	0
OTU_109	Unassigned	145	75	61	84	49	60	68	30	199	92	140	60	105	137	95	24	27	18	110	281	239	76	57	55	33	120	100	212	100	43
OTU_10900	d__Bacteria; p__Planctomycetes; c__Planctomycetia; o__Planctomycetales; f__Isosphaeraceae; g__unclassified; s__unclassified	0	2	0	0	0	0	2	0	0	0	0	0	1	0	1	0	0	0	0	0	0	0	0	0	0	0	1	0	0	0
OTU_10901	d__Bacteria; p__Proteobacteria; c__Alphaproteobacteria; o__Rhodospirillales; f__Acetobacteraceae; g__unclassified; s__unclassified	0	1	0	1	1	0	0	1	1	0	1	0	0	0	0	1	1	0	0	0	0	0	0	0	0	0	0	0	1	0
OTU_10903	d__Bacteria; p__Planctomycetes; c__Planctomycetia; o__Planctomycetales; f__Isosphaeraceae; g__unclassified; s__unclassified	0	1	0	0	0	0	0	0	0	0	0	0	0	0	0	0	0	0	0	0	0	0	0	0	0	0	0	0	0	0
OTU_10904	d__Bacteria; p__unclassified; c__unclassified; o__unclassified; f__unclassified; g__unclassified; s__unclassified	0	1	0	0	0	0	0	0	0	0	0	0	0	0	0	0	0	0	0	0	0	0	0	0	0	0	0	0	0	0
OTU_10908	d__Bacteria; p__Actinobacteria; c__unclassified; o__Streptomycetales; f__Streptomycetaceae; g__Streptomyces; s__unclassified	0	0	2	0	0	0	0	0	0	0	0	0	0	0	0	0	0	0	0	0	0	0	0	0	0	0	0	0	0	0
OTU_1091	Unassigned	2	1	0	0	0	1	1	0	2	0	2	0	0	0	8	0	0	1	0	4	3	0	3	0	0	2	0	1	1	3
OTU_10912	Unassigned	0	0	2	0	0	0	1	0	0	0	0	0	0	0	0	0	0	0	0	0	0	0	1	0	0	0	1	0	0	0
OTU_10913	Unassigned	1	2	7	1	0	2	3	1	0	1	0	1	0	0	0	0	0	0	0	0	0	0	0	0	0	0	3	1	0	0
OTU_10918	d__Bacteria; p__Proteobacteria; c__Gammaproteobacteria; o__Pseudomonadales; f__Pseudomonadaceae; g__unclassified; s__unclassified	0	0	1	0	0	0	0	0	0	0	0	0	0	0	0	0	0	0	0	0	0	0	0	0	0	0	0	1	0	0
OTU_10919	d__Bacteria; p__unclassified; c__unclassified; o__unclassified; f__unclassified; g__unclassified; s__unclassified	0	0	2	0	0	0	0	0	0	0	0	0	0	0	0	0	0	0	0	0	0	0	0	0	0	0	0	0	0	0
OTU_1092	d__Bacteria; p__Planctomycetes; c__Planctomycetia; o__Planctomycetales; f__unclassified; g__unclassified; s__unclassified	2	1	1	1	0	5	3	1	2	1	0	2	0	0	4	0	0	4	5	0	3	6	0	3	3	3	0	2	1	0
OTU_10921	Unassigned	0	0	1	0	0	0	0	0	0	0	0	0	0	0	0	0	0	0	0	0	0	0	0	0	1	0	0	0	0	0
OTU_10924	d__Bacteria; p__Actinobacteria; c__unclassified; o__Streptomycetales; f__Streptomycetaceae; g__unclassified; s__unclassified	0	0	5	0	0	0	0	0	0	0	0	0	2	0	0	0	0	2	0	0	0	0	0	0	0	0	0	0	0	0
OTU_10926	d__Bacteria; p__Proteobacteria; c__Gammaproteobacteria; o__Xanthomonadales; f__Xanthomonadaceae; g__unclassified; s__unclassified	0	0	1	0	0	2	0	2	0	0	0	0	1	0	0	0	0	0	0	0	0	0	0	0	0	0	0	0	0	0
OTU_10928	d__Bacteria; p__Proteobacteria; c__Alphaproteobacteria; o__Rhizobiales; f__Bradyrhizobiaceae; g__Bradyrhizobium; s__unclassified	1	0	2	0	0	0	0	0	0	0	0	0	0	0	0	0	0	0	0	0	0	0	0	0	0	0	2	0	0	0
OTU_10929	d__Bacteria; p__Planctomycetes; c__Planctomycetia; o__Planctomycetales; f__unclassified; g__unclassified; s__unclassified	0	0	1	0	0	0	0	0	0	0	0	0	0	0	0	0	0	0	0	0	0	0	0	0	0	0	0	0	0	0
OTU_1093	Unassigned	14	7	2	39	5	3	5	28	0	9	3	2	3	0	0	10	6	1	0	0	0	1	0	1	0	2	4	1	4	4
OTU_10932	d__Bacteria; p__Proteobacteria; c__Gammaproteobacteria; o__Pseudomonadales; f__Pseudomonadaceae; g__unclassified; s__unclassified	0	0	1	0	0	2	0	0	0	0	2	0	1	0	0	0	0	0	0	0	0	0	0	0	0	0	0	0	1	0
OTU_10935	d__Bacteria; p__Actinobacteria; c__unclassified; o__Frankiales; f__Frankiaceae; g__unclassified; s__unclassified	0	0	2	0	0	0	0	0	0	0	0	0	0	0	0	0	0	0	0	0	0	0	0	0	0	0	0	0	0	0
OTU_10936	d__Bacteria; p__Actinobacteria; c__unclassified; o__Streptomycetales; f__Streptomycetaceae; g__unclassified; s__unclassified	0	0	1	0	0	1	0	0	0	0	0	0	0	0	0	0	0	0	0	0	1	0	0	1	0	0	0	0	0	0
OTU_10937	Unassigned	1	0	3	0	0	0	0	1	1	0	0	0	1	0	0	0	0	0	0	0	0	0	0	1	0	0	0	0	0	2
OTU_10939	Unassigned	0	0	0	1	0	0	0	0	1	0	0	0	0	0	0	0	0	0	0	0	0	0	0	0	0	0	0	0	0	0
OTU_1094	Unassigned	11	9	6	25	8	4	4	16	2	8	10	1	12	0	0	12	10	2	0	5	0	7	1	3	9	7	5	4	23	2
OTU_10944	Unassigned	0	0	1	0	0	0	0	0	0	0	0	0	0	0	0	0	0	0	0	0	0	0	0	0	0	0	0	0	0	0
OTU_10945	d__Bacteria; p__unclassified; c__unclassified; o__unclassified; f__unclassified; g__unclassified; s__unclassified	0	0	1	0	0	0	0	0	0	0	0	0	0	0	0	0	0	0	1	0	0	0	0	0	0	0	0	0	0	0
OTU_10946	d__Bacteria; p__Actinobacteria; c__unclassified; o__Streptomycetales; f__Streptomycetaceae; g__unclassified; s__unclassified	0	0	1	0	0	0	0	0	1	0	0	0	1	0	0	0	1	0	1	0	0	0	1	1	0	0	0	0	1	0
OTU_10949	d__Bacteria; p__Proteobacteria; c__Alphaproteobacteria; o__Caulobacterales; f__Caulobacteraceae; g__unclassified; s__unclassified	0	0	2	0	0	0	0	0	0	0	0	0	0	0	0	0	0	0	0	0	0	0	0	0	0	0	0	0	0	0
OTU_1095	d__Bacteria; p__Actinobacteria; c__unclassified; o__Streptomycetales; f__Streptomycetaceae; g__unclassified; s__unclassified	11	5	0	8	20	1	2	0	0	7	12	0	1	0	0	2	6	0	0	10	0	0	0	0	0	7	1	0	3	10
OTU_10951	d__Bacteria; p__Proteobacteria; c__Alphaproteobacteria; o__Rhizobiales; f__Bradyrhizobiaceae; g__unclassified; s__unclassified	0	0	0	0	0	0	0	1	0	0	0	0	0	0	0	0	0	0	0	0	0	0	0	0	0	0	0	0	0	0
OTU_10952	d__Bacteria; p__Planctomycetes; c__Planctomycetia; o__Planctomycetales; f__Isosphaeraceae; g__unclassified; s__unclassified	0	0	1	0	0	0	0	0	0	0	0	0	0	0	0	0	0	0	0	0	0	0	0	0	0	0	0	0	0	0
OTU_10953	d__Bacteria; p__Actinobacteria; c__unclassified; o__Streptomycetales; f__Streptomycetaceae; g__unclassified; s__unclassified	0	0	1	0	0	0	0	0	0	0	0	0	0	0	0	0	0	0	0	0	0	0	0	0	0	0	0	0	0	0
OTU_10957	d__Bacteria; p__Proteobacteria; c__Alphaproteobacteria; o__Rhizobiales; f__Bradyrhizobiaceae; g__unclassified; s__unclassified	0	0	1	0	0	0	0	0	0	0	0	0	0	0	0	0	0	0	0	0	0	0	0	0	0	0	0	0	0	0
OTU_10958	Unassigned	0	0	1	0	0	0	0	0	0	0	0	0	0	0	0	0	0	0	0	0	0	0	0	0	0	0	0	0	0	0
OTU_1096	d__Bacteria; p__Proteobacteria; c__Gammaproteobacteria; o__Pseudomonadales; f__Pseudomonadaceae; g__unclassified; s__unclassified	0	0	0	0	0	0	0	0	0	0	1	0	0	0	0	0	0	0	0	0	0	0	0	0	0	0	0	0	0	0
OTU_10960	d__Bacteria; p__Proteobacteria; c__Gammaproteobacteria; o__Xanthomonadales; f__Xanthomonadaceae; g__unclassified; s__unclassified	0	0	1	0	0	0	0	0	0	1	0	0	0	0	0	0	0	0	0	0	0	0	0	0	0	0	0	0	0	1
OTU_10962	d__Bacteria; p__Planctomycetes; c__Planctomycetia; o__Planctomycetales; f__Isosphaeraceae; g__unclassified; s__unclassified	0	0	1	0	0	0	0	0	0	1	2	0	0	0	0	0	0	0	0	0	0	0	0	0	0	0	0	0	0	0
OTU_10963	d__Bacteria; p__Proteobacteria; c__Alphaproteobacteria; o__unclassified; f__unclassified; g__unclassified; s__unclassified	0	0	1	0	0	0	1	2	0	0	0	0	0	1	0	0	1	0	1	0	0	0	0	0	0	0	0	0	0	0
OTU_10964	d__Bacteria; p__Proteobacteria; c__Alphaproteobacteria; o__Rhizobiales; f__Bradyrhizobiaceae; g__Bradyrhizobium; s__unclassified	0	1	1	0	0	1	0	0	0	1	0	0	0	0	0	0	0	0	0	0	1	0	0	2	0	0	0	0	0	0
OTU_10965	d__Bacteria; p__unclassified; c__unclassified; o__unclassified; f__unclassified; g__unclassified; s__unclassified	0	0	2	0	0	0	0	0	0	0	0	0	0	0	0	2	0	0	0	0	0	0	0	0	0	0	0	0	0	0
OTU_1097	d__Bacteria; p__Actinobacteria; c__unclassified; o__Micromonosporales; f__Micromonosporaceae; g__unclassified; s__unclassified	0	0	0	0	0	0	0	0	0	0	0	0	0	0	4	0	0	1	4	0	7	0	0	0	2	0	0	0	0	0
OTU_10970	d__Bacteria; p__Planctomycetes; c__Planctomycetia; o__Planctomycetales; f__unclassified; g__unclassified; s__unclassified	0	0	1	1	0	0	0	0	0	0	0	0	0	0	0	0	1	0	0	0	0	0	0	0	1	0	0	0	0	0
OTU_10974	d__Bacteria; p__Actinobacteria; c__unclassified; o__Frankiales; f__Frankiaceae; g__unclassified; s__unclassified	0	0	1	0	0	0	0	0	0	0	0	0	0	0	0	0	0	0	0	0	0	0	0	0	0	0	0	0	0	0
OTU_10975	d__Bacteria; p__Actinobacteria; c__unclassified; o__Micromonosporales; f__Micromonosporaceae; g__Actinoplanes; s__unclassified	0	0	1	0	0	0	0	0	0	0	0	0	0	0	0	0	0	0	0	0	0	0	0	0	0	0	0	0	0	0
OTU_10976	d__Bacteria; p__unclassified; c__unclassified; o__unclassified; f__unclassified; g__unclassified; s__unclassified	0	0	2	0	0	0	0	0	0	0	0	0	0	0	0	1	0	0	0	0	0	0	0	0	0	0	0	0	0	0
OTU_10978	Unassigned	0	0	1	0	0	0	0	0	0	0	0	0	0	0	0	0	0	0	0	0	0	0	0	0	1	0	0	0	0	0
OTU_1098	Unassigned	9	14	2	5	14	7	8	5	3	12	4	0	3	0	2	1	3	0	0	1	1	1	2	8	0	8	5	0	14	11
OTU_10980	d__Bacteria; p__Proteobacteria; c__Alphaproteobacteria; o__Rhizobiales; f__Bradyrhizobiaceae; g__unclassified; s__unclassified	0	0	0	0	0	0	0	1	0	0	0	0	0	0	0	0	0	0	0	0	0	0	0	0	0	0	0	0	0	0
OTU_10984	d__Bacteria; p__Actinobacteria; c__unclassified; o__Streptomycetales; f__Streptomycetaceae; g__unclassified; s__unclassified	0	0	2	0	0	0	0	0	0	0	0	0	0	0	0	0	0	0	0	0	0	0	0	0	0	0	0	0	0	0
OTU_10985	d__Bacteria; p__Proteobacteria; c__Gammaproteobacteria; o__Xanthomonadales; f__Xanthomonadaceae; g__unclassified; s__unclassified	0	1	13	12	2	9	1	4	4	1	3	0	8	1	0	1	4	1	2	3	0	3	0	1	0	1	1	2	0	1
OTU_10987	Unassigned	0	0	1	0	0	0	0	0	0	0	0	0	0	0	0	0	0	0	0	0	0	0	2	0	0	0	0	0	0	0
OTU_10988	Unassigned	0	0	2	0	0	0	0	0	0	0	0	1	0	0	0	0	0	0	0	0	0	0	0	0	0	0	0	0	0	0
OTU_10989	d__Bacteria; p__unclassified; c__unclassified; o__unclassified; f__unclassified; g__unclassified; s__unclassified	0	0	3	0	0	0	0	0	0	0	0	0	0	0	0	0	0	0	0	0	0	0	0	0	0	0	0	0	0	0
OTU_1099	Unassigned	1	1	9	3	2	5	1	4	8	2	4	2	20	7	2	0	7	7	9	10	3	5	10	4	1	9	3	11	19	1
OTU_10990	d__Bacteria; p__unclassified; c__unclassified; o__unclassified; f__unclassified; g__unclassified; s__unclassified	0	0	1	0	0	0	0	0	0	0	0	0	0	0	0	0	0	0	0	0	0	0	0	0	0	0	0	0	0	0
OTU_10991	d__Bacteria; p__unclassified; c__unclassified; o__unclassified; f__unclassified; g__unclassified; s__unclassified	0	0	4	0	0	0	1	0	0	0	0	0	1	0	0	0	0	0	1	0	0	2	0	1	3	0	1	1	0	0
OTU_10992	Unassigned	0	0	2	1	0	0	1	0	0	0	1	0	0	0	0	0	0	0	0	0	0	0	1	0	0	0	0	0	0	0
OTU_10994	Unassigned	0	0	0	0	0	0	0	0	0	0	0	0	0	0	0	0	1	0	0	0	1	0	0	0	0	0	0	0	0	0
OTU_10996	d__Bacteria; p__Actinobacteria; c__unclassified; o__Streptomycetales; f__Streptomycetaceae; g__unclassified; s__unclassified	0	0	1	0	0	0	0	0	0	0	0	0	0	0	0	0	0	0	0	0	0	0	0	0	0	0	1	0	0	0
OTU_10997	Unassigned	0	0	1	0	0	0	0	0	0	0	0	0	0	0	0	0	0	0	0	0	0	0	0	0	0	0	0	0	0	0
OTU_10998	Unassigned	1	1	1	0	0	0	0	0	2	0	0	0	2	0	0	1	0	0	0	0	0	0	0	0	0	0	0	0	0	0
OTU_10999	d__Bacteria; p__Actinobacteria; c__unclassified; o__unclassified; f__unclassified; g__unclassified; s__unclassified	0	0	0	0	0	0	0	0	0	0	0	0	0	0	0	0	0	0	0	0	0	0	0	0	0	0	0	0	0	0
OTU_11	Unassigned	433	607	248	281	645	760	570	899	361	435	401	365	298	113	85	812	1018	231	60	275	61	283	97	232	186	235	306	192	184	519
OTU_110	Unassigned	0	0	0	0	0	0	0	0	0	0	0	0	0	3	11	0	0	20	0	0	5	20	0	2	0	0	0	103	0	0
OTU_1100	Unassigned	27	11	2	12	13	10	3	6	0	12	9	0	2	0	1	8	1	0	0	1	0	0	1	7	1	8	2	0	31	0
OTU_11008	Unassigned	0	0	0	0	0	0	0	0	0	0	0	0	0	0	0	0	0	0	0	0	0	0	0	0	1	0	0	0	0	1
OTU_11010	d__Bacteria; p__Actinobacteria; c__unclassified; o__Pseudonocardiales; f__Pseudonocardiaceae; g__unclassified; s__unclassified	0	0	2	0	0	0	0	0	0	0	0	0	0	0	0	0	0	0	0	0	0	0	0	0	0	0	0	0	0	0
OTU_11011	Unassigned	0	0	2	0	1	1	0	0	0	1	0	0	0	0	0	0	0	0	0	0	1	0	1	0	0	0	0	1	0	0
OTU_11012	d__Bacteria; p__Actinobacteria; c__unclassified; o__Streptomycetales; f__Streptomycetaceae; g__unclassified; s__unclassified	0	0	2	0	0	0	0	0	0	0	0	0	0	0	0	0	0	0	0	0	0	0	0	0	0	0	0	0	0	0
OTU_11014	d__Bacteria; p__Actinobacteria; c__unclassified; o__unclassified; f__unclassified; g__unclassified; s__unclassified	0	0	6	0	0	0	0	0	0	0	0	0	0	0	3	0	0	0	0	0	0	0	0	0	0	0	0	0	0	0
OTU_11015	d__Bacteria; p__Planctomycetes; c__Planctomycetia; o__Planctomycetales; f__unclassified; g__unclassified; s__unclassified	0	0	0	0	0	0	0	0	0	0	0	0	0	0	0	0	0	0	0	0	0	0	0	0	1	0	0	0	0	0
OTU_11016	Unassigned	0	0	2	0	0	0	0	0	0	0	0	1	0	0	0	0	0	0	0	1	0	0	0	0	0	0	0	0	0	0
OTU_11018	Unassigned	0	0	1	0	0	0	0	0	0	0	0	0	0	0	0	0	0	0	0	0	0	0	0	0	0	0	0	0	0	0
OTU_11019	Unassigned	0	0	1	0	0	0	0	0	0	0	0	0	0	0	0	0	0	0	0	0	0	0	0	0	0	0	0	0	0	0
OTU_1102	d__Bacteria; p__Actinobacteria; c__unclassified; o__Streptomycetales; f__Streptomycetaceae; g__unclassified; s__unclassified	15	18	30	5	17	28	33	21	8	25	11	20	11	1	10	26	11	0	0	5	9	2	11	20	3	16	57	3	7	44
OTU_11021	d__Bacteria; p__Proteobacteria; c__unclassified; o__unclassified; f__unclassified; g__unclassified; s__unclassified	0	0	2	0	0	0	0	0	0	0	0	1	0	1	1	0	0	2	1	0	0	3	0	0	0	0	0	1	0	0
OTU_11022	d__Bacteria; p__unclassified; c__unclassified; o__unclassified; f__unclassified; g__unclassified; s__unclassified	0	0	0	0	1	0	0	1	0	0	0	0	0	0	0	0	0	0	0	0	0	0	0	0	0	0	0	0	0	0
OTU_11028	d__Bacteria; p__Proteobacteria; c__Gammaproteobacteria; o__Pseudomonadales; f__Pseudomonadaceae; g__unclassified; s__unclassified	0	0	2	0	0	0	0	0	0	0	0	0	0	0	0	0	0	0	0	0	0	0	0	0	0	0	0	0	0	0
OTU_11029	Unassigned	0	0	0	0	0	0	0	0	0	0	0	0	0	0	0	0	0	2	0	0	0	0	0	0	0	0	0	1	0	0
OTU_1103	Unassigned	10	4	0	1	2	1	5	2	0	21	7	4	1	0	0	1	1	0	1	0	0	0	1	0	0	6	3	2	6	0
OTU_11030	Unassigned	0	4	11	2	2	1	2	3	0	3	4	4	5	1	2	6	5	0	4	2	0	0	1	3	3	5	3	1	1	1
OTU_11031	Unassigned	0	0	1	0	0	0	0	0	0	0	0	0	0	0	0	0	0	0	0	0	0	0	0	0	0	0	0	0	0	0
OTU_11032	d__Bacteria; p__Planctomycetes; c__unclassified; o__unclassified; f__unclassified; g__unclassified; s__unclassified	0	0	0	0	0	0	0	0	1	0	0	0	0	1	0	0	0	1	0	0	0	0	0	0	0	0	0	0	0	0
OTU_11035	d__Bacteria; p__Actinobacteria; c__unclassified; o__unclassified; f__unclassified; g__unclassified; s__unclassified	0	0	2	0	0	0	0	1	0	0	1	0	0	0	0	2	0	0	0	0	0	0	0	0	0	0	0	1	1	0
OTU_11038	d__Bacteria; p__Planctomycetes; c__Planctomycetia; o__Planctomycetales; f__unclassified; g__unclassified; s__unclassified	0	0	1	0	0	0	0	0	0	0	0	0	0	0	0	0	0	0	0	0	0	0	0	0	0	0	0	0	0	0
OTU_1104	Unassigned	17	6	4	0	14	12	13	13	3	24	15	7	16	0	0	25	18	0	3	0	0	3	0	0	0	2	4	1	9	1
OTU_11043	d__Bacteria; p__Proteobacteria; c__Alphaproteobacteria; o__Caulobacterales; f__Caulobacteraceae; g__unclassified; s__unclassified	0	0	0	0	0	0	0	0	0	0	0	0	0	0	0	0	0	1	0	0	1	0	0	0	0	0	0	0	0	0
OTU_11044	d__Bacteria; p__Planctomycetes; c__unclassified; o__unclassified; f__unclassified; g__unclassified; s__unclassified	0	0	0	0	0	0	0	0	0	2	0	0	0	0	0	0	0	0	0	0	0	0	0	0	0	0	0	0	0	0
OTU_1105	d__Bacteria; p__Actinobacteria; c__unclassified; o__unclassified; f__unclassified; g__unclassified; s__unclassified	3	0	0	0	7	1	0	2	5	7	14	0	1	3	6	1	11	2	0	3	1	3	0	0	3	10	3	4	13	1
OTU_11053	d__Bacteria; p__Firmicutes; c__Bacilli; o__Bacillales; f__Paenibacillaceae; g__unclassified; s__unclassified	0	0	0	0	0	0	0	0	0	0	0	0	0	0	0	0	0	0	0	0	0	0	0	0	0	0	0	0	0	0
OTU_11055	d__Bacteria; p__Planctomycetes; c__unclassified; o__unclassified; f__unclassified; g__unclassified; s__unclassified	0	0	0	0	0	0	0	0	0	0	1	0	0	0	0	0	0	0	0	0	0	0	0	0	0	0	0	0	0	0
OTU_11056	d__Bacteria; p__Actinobacteria; c__unclassified; o__Corynebacteriales; f__Mycobacteriaceae; g__unclassified; s__unclassified	0	0	2	0	0	0	0	0	1	0	0	0	1	0	0	2	0	0	0	0	0	0	0	1	0	0	0	0	1	0
OTU_1106	d__Bacteria; p__Planctomycetes; c__unclassified; o__unclassified; f__unclassified; g__unclassified; s__unclassified	3	3	3	5	0	1	7	1	0	1	3	0	0	0	2	3	3	0	0	0	3	2	2	13	4	5	3	2	0	0
OTU_11060	d__Bacteria; p__Actinobacteria; c__unclassified; o__Streptomycetales; f__Streptomycetaceae; g__unclassified; s__unclassified	1	0	0	0	1	0	0	0	0	0	0	0	0	0	0	1	0	0	0	1	0	0	0	0	0	1	0	0	0	0
OTU_11064	Unassigned	0	0	0	0	0	0	0	0	0	0	0	0	0	0	0	0	0	0	0	0	0	0	0	0	0	2	0	0	0	0
OTU_11066	d__Bacteria; p__Actinobacteria; c__unclassified; o__Streptomycetales; f__Streptomycetaceae; g__unclassified; s__unclassified	0	0	0	0	0	0	0	0	0	0	0	0	0	0	0	0	0	0	0	0	0	0	0	0	0	0	0	0	0	0
OTU_11069	d__Bacteria; p__unclassified; c__unclassified; o__unclassified; f__unclassified; g__unclassified; s__unclassified	0	0	0	0	0	0	0	0	0	0	0	0	0	0	0	0	0	0	0	0	0	0	0	0	0	0	0	0	0	0
OTU_1107	d__Bacteria; p__Proteobacteria; c__Gammaproteobacteria; o__Xanthomonadales; f__Xanthomonadaceae; g__unclassified; s__unclassified	0	0	1	2	0	0	0	0	0	0	0	6	0	4	0	0	0	5	7	0	1	9	0	0	0	0	0	6	0	0
OTU_11070	Unassigned	0	0	0	0	0	0	0	0	0	0	0	0	1	0	0	0	0	0	0	0	0	0	0	0	0	1	1	0	3	2
OTU_11072	Unassigned	0	0	0	0	0	0	0	0	0	0	0	0	0	0	0	0	0	0	0	0	0	0	0	0	0	0	0	0	0	0
OTU_11074	Unassigned	0	0	0	0	0	0	0	0	0	0	0	0	0	0	0	0	0	0	0	0	0	0	0	0	0	0	0	0	0	0
OTU_11077	d__Bacteria; p__Proteobacteria; c__Gammaproteobacteria; o__Xanthomonadales; f__Xanthomonadaceae; g__unclassified; s__unclassified	0	0	0	0	0	0	0	0	0	0	0	0	0	0	1	0	0	0	0	0	0	0	0	0	0	0	0	0	0	0
OTU_1108	d__Bacteria; p__unclassified; c__unclassified; o__unclassified; f__unclassified; g__unclassified; s__unclassified	6	7	2	6	5	9	5	9	5	9	6	1	15	1	0	9	8	0	0	0	1	0	0	2	1	6	3	1	14	1
OTU_11080	d__Bacteria; p__Proteobacteria; c__unclassified; o__unclassified; f__unclassified; g__unclassified; s__unclassified	0	0	0	0	0	0	0	0	0	0	0	0	0	0	0	0	0	0	0	0	1	0	0	1	0	0	0	0	0	0
OTU_11081	d__Bacteria; p__Proteobacteria; c__Gammaproteobacteria; o__Xanthomonadales; f__Xanthomonadaceae; g__unclassified; s__unclassified	0	0	0	0	0	0	0	0	0	0	0	0	0	0	0	0	0	1	0	0	0	0	0	0	0	0	0	0	0	0
OTU_11083	d__Bacteria; p__Proteobacteria; c__unclassified; o__unclassified; f__unclassified; g__unclassified; s__unclassified	0	0	0	0	0	0	0	0	0	0	0	1	0	0	0	0	0	0	0	0	0	0	0	0	0	0	0	0	0	0
OTU_11085	d__Bacteria; p__unclassified; c__unclassified; o__unclassified; f__unclassified; g__unclassified; s__unclassified	0	0	0	0	0	0	0	0	0	1	0	0	0	0	0	0	0	0	0	0	0	0	0	0	0	0	0	0	0	0
OTU_11089	Unassigned	0	0	0	0	0	0	0	0	0	0	0	0	0	0	0	0	0	0	0	0	0	0	0	0	0	0	0	0	0	0
OTU_1109	Unassigned	7	1	0	2	2	4	0	4	0	9	3	2	2	0	1	6	13	0	0	0	0	0	0	1	0	3	1	0	3	0
OTU_11093	Unassigned	0	0	0	0	0	0	0	0	0	0	0	0	0	0	0	0	0	0	0	0	0	0	0	0	0	0	0	0	0	0
OTU_11095	d__Bacteria; p__Actinobacteria; c__unclassified; o__Micromonosporales; f__Micromonosporaceae; g__Actinoplanes; s__unclassified	0	0	0	0	0	0	0	0	0	0	0	0	0	0	0	0	0	0	0	0	0	0	0	0	0	0	0	0	0	0
OTU_11096	d__Bacteria; p__Planctomycetes; c__Planctomycetia; o__Planctomycetales; f__Isosphaeraceae; g__unclassified; s__unclassified	0	0	0	0	0	0	0	0	0	0	0	0	0	1	0	0	0	0	1	0	0	0	0	0	0	0	0	0	0	0
OTU_11097	d__Bacteria; p__Actinobacteria; c__unclassified; o__Micrococcales; f__Micrococcaceae; g__unclassified; s__unclassified	0	0	0	0	0	0	0	0	0	0	0	0	0	0	0	0	0	0	0	0	0	0	0	0	0	0	0	0	0	0
OTU_11098	Unassigned	0	0	0	0	0	0	0	0	0	0	0	0	0	0	0	0	0	0	0	0	0	0	0	0	0	0	0	0	0	0
OTU_11099	d__Bacteria; p__Proteobacteria; c__Alphaproteobacteria; o__Caulobacterales; f__Caulobacteraceae; g__unclassified; s__unclassified	0	0	0	0	0	0	0	0	0	0	0	0	0	0	0	0	0	0	0	0	0	0	0	0	0	0	0	0	0	0
OTU_111	d__Bacteria; p__Planctomycetes; c__Planctomycetia; o__Planctomycetales; f__Isosphaeraceae; g__unclassified; s__unclassified	22	37	109	127	12	37	42	12	10	15	31	3	13	7	1	12	9	0	16	72	36	43	6	87	110	51	74	80	97	33
OTU_1110	d__Bacteria; p__unclassified; c__unclassified; o__unclassified; f__unclassified; g__unclassified; s__unclassified	1	0	0	1	1	0	1	4	0	0	0	0	1	0	0	5	13	0	0	1	0	0	0	1	0	0	0	9	2	0
OTU_11101	d__Bacteria; p__Proteobacteria; c__Gammaproteobacteria; o__Xanthomonadales; f__Xanthomonadaceae; g__unclassified; s__unclassified	0	0	0	0	0	0	0	0	0	0	0	0	0	0	0	0	0	0	0	0	0	0	0	0	0	0	0	0	0	0
OTU_11102	d__Bacteria; p__Actinobacteria; c__unclassified; o__Streptomycetales; f__Streptomycetaceae; g__unclassified; s__unclassified	0	0	0	0	0	0	0	0	0	0	0	0	0	0	0	0	0	0	0	0	0	0	0	0	0	0	0	0	0	0
OTU_11103	d__Bacteria; p__Proteobacteria; c__Alphaproteobacteria; o__Caulobacterales; f__Caulobacteraceae; g__unclassified; s__unclassified	0	0	0	0	0	0	0	0	0	0	0	0	0	0	0	0	0	2	0	0	0	0	0	0	0	0	0	0	0	0
OTU_11104	d__Bacteria; p__Proteobacteria; c__Gammaproteobacteria; o__Pseudomonadales; f__Pseudomonadaceae; g__unclassified; s__unclassified	0	0	0	0	0	0	0	0	0	0	0	0	0	0	0	0	0	0	0	0	0	0	0	0	0	0	0	0	0	0
OTU_11105	d__Bacteria; p__Planctomycetes; c__unclassified; o__unclassified; f__unclassified; g__unclassified; s__unclassified	0	0	0	0	0	0	0	0	0	0	0	0	0	0	0	0	0	0	0	0	0	0	0	0	0	0	0	0	0	0
OTU_11107	d__Bacteria; p__Planctomycetes; c__Planctomycetia; o__Planctomycetales; f__Isosphaeraceae; g__unclassified; s__unclassified	0	0	0	0	0	0	0	0	0	0	0	0	0	0	0	0	0	0	0	0	0	0	0	0	0	0	0	0	0	0
OTU_11108	d__Bacteria; p__Proteobacteria; c__Gammaproteobacteria; o__Xanthomonadales; f__Xanthomonadaceae; g__unclassified; s__unclassified	0	0	0	0	0	0	0	0	0	0	0	0	0	2	0	0	0	1	0	0	0	0	0	0	0	0	0	0	0	0
OTU_1111	d__Bacteria; p__Proteobacteria; c__unclassified; o__unclassified; f__unclassified; g__unclassified; s__unclassified	3	27	0	1	22	13	7	14	0	11	5	0	2	0	0	14	5	0	0	0	0	0	0	0	0	0	2	0	1	9
OTU_11115	d__Bacteria; p__Proteobacteria; c__Gammaproteobacteria; o__Xanthomonadales; f__Xanthomonadaceae; g__unclassified; s__unclassified	0	0	0	0	0	0	0	0	0	0	0	0	0	1	0	0	0	0	1	0	0	0	0	0	0	0	0	0	0	0
OTU_11116	d__Bacteria; p__Actinobacteria; c__unclassified; o__Streptomycetales; f__Streptomycetaceae; g__unclassified; s__unclassified	0	0	0	0	0	0	0	0	0	0	0	0	0	2	0	0	0	0	0	0	0	0	0	0	0	0	0	0	0	0
OTU_11118	d__Bacteria; p__Planctomycetes; c__Planctomycetia; o__Planctomycetales; f__Gemmataceae; g__unclassified; s__unclassified	0	0	0	0	0	0	0	0	0	0	0	0	0	0	0	0	0	0	0	0	0	0	0	0	0	0	0	0	0	0
OTU_1112	Unassigned	0	0	1	0	2	3	0	2	0	0	0	0	0	0	0	0	3	0	0	1	0	0	0	0	0	0	0	3	1	0
OTU_11122	d__Bacteria; p__unclassified; c__unclassified; o__unclassified; f__unclassified; g__unclassified; s__unclassified	0	0	0	0	0	0	0	0	0	0	0	0	0	0	0	0	0	0	0	0	0	0	0	0	0	0	0	0	0	0
OTU_11123	d__Bacteria; p__Planctomycetes; c__Planctomycetia; o__Planctomycetales; f__Isosphaeraceae; g__unclassified; s__unclassified	0	0	0	0	0	0	0	0	0	0	0	0	0	0	1	0	0	1	0	0	0	0	0	0	0	0	0	1	0	0
OTU_11125	d__Bacteria; p__unclassified; c__unclassified; o__unclassified; f__unclassified; g__unclassified; s__unclassified	0	0	0	0	0	0	0	0	0	0	0	0	0	0	0	0	0	0	0	0	0	0	0	0	0	0	0	0	0	0
OTU_11128	d__Bacteria; p__Actinobacteria; c__unclassified; o__Streptomycetales; f__Streptomycetaceae; g__unclassified; s__unclassified	0	0	0	0	0	0	0	0	0	1	0	0	0	0	0	0	0	0	0	0	0	0	0	0	0	0	0	0	0	0
OTU_1113	d__Bacteria; p__Actinobacteria; c__unclassified; o__Streptomycetales; f__Streptomycetaceae; g__unclassified; s__unclassified	1	4	0	0	12	3	0	2	0	0	4	1	3	0	0	1	5	0	0	0	1	0	0	0	2	0	0	3	0	0
OTU_11130	d__Bacteria; p__Actinobacteria; c__unclassified; o__Streptomycetales; f__Streptomycetaceae; g__unclassified; s__unclassified	0	0	0	0	0	0	0	0	0	0	0	0	0	0	0	0	0	0	0	0	0	0	0	0	0	0	0	0	0	0
OTU_11133	d__Bacteria; p__Actinobacteria; c__unclassified; o__Pseudonocardiales; f__Pseudonocardiaceae; g__unclassified; s__unclassified	0	0	0	0	0	0	0	0	0	0	0	0	0	0	0	0	0	0	0	0	0	0	0	0	0	0	0	0	0	0
OTU_11134	Unassigned	0	0	0	0	0	0	0	0	0	0	0	0	0	0	0	0	0	0	0	0	0	0	0	0	0	0	0	0	0	0
OTU_11138	Unassigned	0	0	0	0	0	0	0	0	0	0	0	1	0	0	0	0	0	1	0	0	0	0	0	0	0	0	0	0	0	0
OTU_11139	d__Bacteria; p__unclassified; c__unclassified; o__unclassified; f__unclassified; g__unclassified; s__unclassified	0	0	0	0	1	0	0	0	0	0	0	0	0	0	0	0	0	0	0	0	0	0	0	0	0	0	0	0	0	0
OTU_1114	d__Bacteria; p__Actinobacteria; c__unclassified; o__Streptomycetales; f__Streptomycetaceae; g__unclassified; s__unclassified	0	1	0	3	0	0	0	0	0	0	0	0	0	0	7	0	0	0	0	0	1	0	9	11	0	0	0	0	0	2
OTU_11140	d__Bacteria; p__Proteobacteria; c__Alphaproteobacteria; o__Rhizobiales; f__Bradyrhizobiaceae; g__unclassified; s__unclassified	0	0	0	0	0	0	0	0	0	0	0	0	0	0	0	0	0	0	0	0	0	0	0	0	0	0	0	0	0	0
OTU_11143	d__Bacteria; p__Proteobacteria; c__Gammaproteobacteria; o__Xanthomonadales; f__Xanthomonadaceae; g__unclassified; s__unclassified	0	0	0	0	0	0	0	0	2	0	0	0	0	0	0	0	0	0	0	0	0	0	0	0	0	0	0	0	0	0
OTU_11144	d__Bacteria; p__Proteobacteria; c__Gammaproteobacteria; o__Xanthomonadales; f__Xanthomonadaceae; g__unclassified; s__unclassified	0	0	0	0	0	0	0	0	0	0	0	0	0	0	2	0	0	0	1	0	0	1	0	0	1	0	0	0	0	0
OTU_11146	d__Bacteria; p__Actinobacteria; c__unclassified; o__Streptomycetales; f__Streptomycetaceae; g__unclassified; s__unclassified	0	0	0	0	0	0	0	0	0	0	0	0	0	0	0	0	0	0	0	0	0	0	0	0	0	0	0	0	0	0
OTU_11149	d__Bacteria; p__Proteobacteria; c__Alphaproteobacteria; o__Rhizobiales; f__Bradyrhizobiaceae; g__unclassified; s__unclassified	0	0	0	0	0	0	0	0	0	0	0	0	0	0	0	0	0	0	0	0	0	0	0	0	0	0	0	1	0	0
OTU_1115	Unassigned	3	0	0	2	0	0	0	0	0	0	0	0	2	0	0	0	1	0	0	0	0	0	0	0	0	16	1	2	12	0
OTU_11150	d__Bacteria; p__Actinobacteria; c__unclassified; o__Streptomycetales; f__Streptomycetaceae; g__unclassified; s__unclassified	0	0	0	0	0	0	0	0	0	0	0	0	0	0	0	0	0	0	0	0	0	0	0	0	0	0	0	0	0	0
OTU_11154	d__Bacteria; p__Proteobacteria; c__Gammaproteobacteria; o__Xanthomonadales; f__Xanthomonadaceae; g__unclassified; s__unclassified	0	0	0	0	0	0	0	0	1	0	0	0	2	0	0	0	0	0	0	0	0	0	0	0	0	0	0	0	0	0
OTU_11155	d__Bacteria; p__Planctomycetes; c__Planctomycetia; o__Planctomycetales; f__Isosphaeraceae; g__unclassified; s__unclassified	0	0	0	0	0	0	0	0	0	0	0	0	2	0	0	0	0	0	0	0	1	0	0	0	0	0	1	0	0	0
OTU_11158	Unassigned	0	0	0	0	0	0	0	0	0	0	0	0	0	0	0	0	0	0	0	0	0	0	0	0	0	0	0	0	0	0
OTU_11159	Unassigned	0	0	0	0	0	0	2	0	0	0	0	0	0	0	2	0	0	2	2	0	0	1	0	0	1	0	0	0	0	0
OTU_1116	Unassigned	0	2	3	0	6	0	0	4	0	4	2	0	0	0	0	3	1	0	0	0	0	0	0	0	0	0	9	0	1	0
OTU_11160	Unassigned	0	0	0	0	0	0	0	0	0	0	0	0	0	0	0	0	0	0	1	0	0	0	0	0	0	0	0	0	0	0
OTU_11164	Unassigned	0	0	0	0	0	0	0	0	0	0	0	0	0	0	0	0	0	0	0	0	0	0	0	0	0	0	0	0	0	0
OTU_11167	d__Bacteria; p__Proteobacteria; c__Gammaproteobacteria; o__Pseudomonadales; f__Pseudomonadaceae; g__unclassified; s__unclassified	0	0	0	2	0	0	0	0	0	0	0	0	0	0	0	0	0	0	0	0	0	0	0	0	0	0	0	0	0	0
OTU_11169	d__Bacteria; p__Planctomycetes; c__Planctomycetia; o__Planctomycetales; f__unclassified; g__unclassified; s__unclassified	1	0	0	2	0	0	0	1	0	0	1	1	1	0	1	0	1	0	0	2	0	0	1	0	0	0	0	0	1	0
OTU_1117	d__Bacteria; p__Proteobacteria; c__Gammaproteobacteria; o__Pseudomonadales; f__Pseudomonadaceae; g__unclassified; s__unclassified	1	0	1	1	0	0	0	3	0	0	0	1	1	6	1	0	1	3	3	0	8	2	1	3	2	1	3	4	0	0
OTU_11170	d__Bacteria; p__Proteobacteria; c__Alphaproteobacteria; o__Rhizobiales; f__Bradyrhizobiaceae; g__Bradyrhizobium; s__unclassified	1	0	0	2	0	0	0	0	0	0	0	0	0	2	0	0	0	0	0	0	0	0	0	0	0	0	0	0	2	0
OTU_11171	Unassigned	0	0	0	1	0	0	0	0	0	0	0	1	0	0	0	0	0	0	0	0	0	0	0	0	0	0	0	0	0	0
OTU_11172	Unassigned	0	0	0	1	0	0	0	0	0	0	0	0	0	0	0	0	0	0	0	0	0	0	0	0	0	0	0	1	0	0
OTU_11175	Unassigned	0	0	0	1	1	1	0	0	0	1	0	0	0	0	0	0	0	0	0	0	0	0	0	0	0	0	1	0	0	0
OTU_11178	Unassigned	0	0	0	2	0	0	0	0	0	0	0	0	0	0	0	0	0	0	0	0	0	0	0	0	0	0	0	0	0	0
OTU_11179	d__Bacteria; p__Proteobacteria; c__Gammaproteobacteria; o__Xanthomonadales; f__Xanthomonadaceae; g__unclassified; s__unclassified	0	0	0	1	0	0	0	0	0	0	0	0	0	0	0	0	0	0	0	0	0	0	0	0	0	0	0	0	0	0
OTU_1118	d__Bacteria; p__Planctomycetes; c__Planctomycetia; o__Planctomycetales; f__unclassified; g__unclassified; s__unclassified	2	7	1	1	1	0	0	0	3	1	8	0	5	0	0	1	3	0	1	4	2	1	1	1	0	2	2	2	5	6
OTU_11184	Unassigned	0	0	0	3	1	0	0	0	1	0	0	1	0	1	0	0	0	1	2	0	0	0	0	0	0	0	0	1	0	0
OTU_1119	d__Bacteria; p__Proteobacteria; c__Gammaproteobacteria; o__Pseudomonadales; f__Pseudomonadaceae; g__unclassified; s__unclassified	0	0	0	0	1	0	0	0	0	1	0	0	4	4	0	1	0	2	0	0	0	0	0	0	2	0	0	1	1	0
OTU_11191	Unassigned	0	0	0	2	0	0	0	0	0	0	0	0	0	0	0	0	0	0	0	0	0	0	0	0	0	0	0	0	0	0
OTU_11193	Unassigned	0	0	0	1	0	0	0	0	0	0	0	0	0	0	0	0	0	0	0	0	0	0	0	0	0	0	1	0	0	0
OTU_11194	d__Bacteria; p__Actinobacteria; c__unclassified; o__unclassified; f__unclassified; g__unclassified; s__unclassified	0	0	0	2	0	1	0	0	0	0	0	0	0	0	0	0	0	0	0	0	0	0	0	0	0	0	0	0	0	0
OTU_11196	d__Bacteria; p__Actinobacteria; c__unclassified; o__Frankiales; f__Frankiaceae; g__unclassified; s__unclassified	0	0	0	1	0	0	0	0	0	0	0	0	0	0	0	0	0	0	0	0	0	0	0	0	0	0	0	0	1	0
OTU_11197	d__Bacteria; p__Proteobacteria; c__Alphaproteobacteria; o__unclassified; f__unclassified; g__unclassified; s__unclassified	0	0	0	2	0	0	0	0	0	2	0	0	0	0	0	1	0	0	0	0	0	0	0	0	0	0	0	0	0	1
OTU_11198	Unassigned	0	1	0	0	0	0	0	0	0	2	0	0	0	0	0	0	0	0	0	0	0	0	1	0	0	0	0	0	0	0
OTU_11199	d__Bacteria; p__Proteobacteria; c__Alphaproteobacteria; o__Rhodospirillales; f__Acetobacteraceae; g__unclassified; s__unclassified	0	0	0	2	0	0	0	0	0	0	0	0	0	0	0	0	0	0	0	0	0	0	0	0	0	0	0	0	0	0
OTU_112	d__Bacteria; p__Actinobacteria; c__unclassified; o__unclassified; f__unclassified; g__unclassified; s__unclassified	1	0	0	0	5	0	1	1	3	2	0	7	4	1	3	0	0	0	2	0	6	0	2	19	119	0	6	3	2	9
OTU_1120	d__Bacteria; p__Proteobacteria; c__Gammaproteobacteria; o__Xanthomonadales; f__Xanthomonadaceae; g__unclassified; s__unclassified	3	20	3	4	18	15	14	11	0	14	8	0	0	0	0	5	4	0	0	6	0	0	0	4	0	10	8	3	8	6
OTU_11200	d__Bacteria; p__Planctomycetes; c__Planctomycetia; o__Planctomycetales; f__unclassified; g__unclassified; s__unclassified	0	0	0	2	0	0	0	0	0	0	0	0	0	0	0	0	0	0	0	0	0	0	0	0	0	0	0	0	0	0
OTU_11204	d__Bacteria; p__unclassified; c__unclassified; o__unclassified; f__unclassified; g__unclassified; s__unclassified	0	0	0	1	2	1	0	0	0	0	0	0	1	0	0	0	0	0	0	0	0	0	0	0	0	0	0	0	0	0
OTU_11205	d__Bacteria; p__Planctomycetes; c__Planctomycetia; o__Planctomycetales; f__Isosphaeraceae; g__unclassified; s__unclassified	0	0	0	0	0	0	0	0	0	0	0	0	1	0	0	0	0	0	0	0	0	2	0	0	0	0	0	0	1	0
OTU_11209	d__Bacteria; p__Actinobacteria; c__unclassified; o__Streptomycetales; f__Streptomycetaceae; g__Streptomyces; s__unclassified	0	0	0	0	0	0	0	0	0	0	0	0	0	0	0	0	0	0	0	0	0	0	1	0	0	0	0	1	0	0
OTU_1121	d__Bacteria; p__Proteobacteria; c__Gammaproteobacteria; o__Xanthomonadales; f__Xanthomonadaceae; g__unclassified; s__unclassified	1	13	2	5	1	14	15	4	0	8	4	2	3	0	0	9	0	0	0	1	0	0	3	4	0	1	12	0	0	7
OTU_11212	Unassigned	0	0	0	2	0	0	0	0	0	0	0	0	0	0	0	0	0	0	0	0	0	0	0	0	0	0	0	0	0	0
OTU_11215	Unassigned	0	0	0	1	0	0	0	0	0	0	0	0	0	0	0	0	0	0	0	0	0	0	0	0	0	0	0	0	0	0
OTU_11217	d__Bacteria; p__Actinobacteria; c__unclassified; o__Streptomycetales; f__Streptomycetaceae; g__unclassified; s__unclassified	0	0	0	1	0	0	1	0	0	0	0	0	0	0	0	0	0	0	0	0	0	0	0	0	0	0	0	0	0	0
OTU_11218	d__Bacteria; p__Planctomycetes; c__Planctomycetia; o__Planctomycetales; f__Isosphaeraceae; g__Paludisphaera; s__unclassified	0	0	0	1	0	0	0	0	0	0	0	0	0	0	0	0	0	0	0	0	0	0	0	0	0	0	0	0	0	0
OTU_11219	d__Bacteria; p__Proteobacteria; c__Gammaproteobacteria; o__Xanthomonadales; f__Xanthomonadaceae; g__unclassified; s__unclassified	0	0	0	1	0	0	0	0	0	0	0	0	0	0	0	0	0	0	0	0	0	0	0	0	0	0	0	0	0	0
OTU_1122	d__Bacteria; p__Planctomycetes; c__Planctomycetia; o__Planctomycetales; f__unclassified; g__unclassified; s__unclassified	0	0	0	0	0	0	13	0	0	0	0	0	0	0	0	0	0	0	0	0	0	0	0	0	0	0	0	0	0	0
OTU_11220	d__Bacteria; p__Proteobacteria; c__Alphaproteobacteria; o__Rhizobiales; f__Bradyrhizobiaceae; g__Bradyrhizobium; s__unclassified	0	0	0	1	0	0	0	0	0	0	0	0	0	0	0	0	0	0	0	0	0	0	0	0	0	0	0	0	0	0
OTU_11221	d__Bacteria; p__Proteobacteria; c__Alphaproteobacteria; o__Rhizobiales; f__Bradyrhizobiaceae; g__Bradyrhizobium; s__unclassified	0	0	0	0	0	0	0	0	0	0	0	0	0	0	0	0	0	1	0	0	0	1	0	0	0	2	1	0	0	0
OTU_11222	Unassigned	0	0	0	2	0	0	0	0	0	0	0	0	0	0	0	0	0	0	0	0	0	0	0	1	0	0	0	0	0	0
OTU_1123	d__Bacteria; p__Actinobacteria; c__unclassified; o__unclassified; f__unclassified; g__unclassified; s__unclassified	1	0	4	0	0	3	2	6	9	0	1	7	26	2	2	1	1	8	0	0	0	5	0	0	0	1	2	3	4	0
OTU_11235	d__Bacteria; p__Actinobacteria; c__unclassified; o__Streptomycetales; f__Streptomycetaceae; g__unclassified; s__unclassified	0	1	0	2	0	0	0	0	0	0	1	0	0	0	0	0	0	0	0	0	0	0	0	0	0	0	0	0	0	0
OTU_11236	d__Bacteria; p__Actinobacteria; c__unclassified; o__Pseudonocardiales; f__Pseudonocardiaceae; g__unclassified; s__unclassified	0	0	0	2	0	0	0	0	0	0	0	0	0	0	0	0	0	0	0	0	0	0	0	0	0	0	0	0	0	0
OTU_11237	Unassigned	0	0	0	2	0	0	0	0	0	0	0	0	0	0	0	0	0	0	0	0	0	0	0	0	0	0	0	0	0	0
OTU_11238	d__Bacteria; p__Actinobacteria; c__unclassified; o__unclassified; f__unclassified; g__unclassified; s__unclassified	0	0	0	1	0	0	0	0	0	0	0	0	0	0	0	0	0	0	0	0	0	0	0	0	0	0	0	0	0	0
OTU_1124	d__Bacteria; p__Planctomycetes; c__Planctomycetia; o__Planctomycetales; f__Isosphaeraceae; g__Paludisphaera; s__unclassified	5	0	0	8	2	1	0	1	5	2	2	2	0	17	0	0	2	5	5	0	10	0	8	2	1	0	1	2	0	2
OTU_11241	Unassigned	0	0	0	2	0	0	0	0	0	0	0	0	0	0	0	0	0	0	0	0	0	0	0	0	0	0	0	0	0	0
OTU_11242	d__Bacteria; p__Actinobacteria; c__unclassified; o__Streptomycetales; f__Streptomycetaceae; g__unclassified; s__unclassified	0	0	0	2	0	0	0	0	0	0	0	0	0	0	0	0	0	0	0	0	0	0	0	0	0	0	0	0	0	0
OTU_11245	d__Bacteria; p__Actinobacteria; c__unclassified; o__Streptomycetales; f__Streptomycetaceae; g__unclassified; s__unclassified	0	0	0	2	0	0	2	0	0	0	0	0	1	0	0	0	0	0	0	0	0	0	0	0	0	0	0	0	0	0
OTU_1125	Unassigned	0	0	0	0	0	0	0	0	0	0	0	0	0	13	7	0	0	0	0	0	4	0	1	0	0	0	0	0	0	0
OTU_11250	Unassigned	0	0	0	1	2	0	0	0	0	0	0	0	0	0	0	0	1	0	0	0	0	0	0	0	0	0	0	0	0	1
OTU_11251	d__Bacteria; p__unclassified; c__unclassified; o__unclassified; f__unclassified; g__unclassified; s__unclassified	0	0	0	2	0	0	0	0	0	0	0	0	0	0	0	0	0	0	0	0	0	0	0	0	0	0	0	0	0	0
OTU_11252	Unassigned	0	0	0	2	0	0	1	0	0	1	0	0	0	0	0	1	0	0	0	0	0	0	0	0	0	0	0	0	0	0
OTU_11253	d__Bacteria; p__Actinobacteria; c__unclassified; o__Streptomycetales; f__Streptomycetaceae; g__unclassified; s__unclassified	0	0	1	1	0	0	0	0	0	0	0	0	0	0	0	0	0	0	0	0	1	0	0	0	0	0	0	0	0	0
OTU_11256	d__Bacteria; p__Planctomycetes; c__Planctomycetia; o__Planctomycetales; f__unclassified; g__unclassified; s__unclassified	0	0	0	3	0	0	0	0	0	0	0	0	0	0	0	0	0	0	0	0	0	0	0	0	0	0	0	0	0	0
OTU_11259	d__Bacteria; p__Planctomycetes; c__Planctomycetia; o__Planctomycetales; f__unclassified; g__unclassified; s__unclassified	0	0	0	2	0	0	0	0	0	0	0	0	0	0	0	0	0	0	0	0	0	0	0	0	0	0	0	0	0	0
OTU_1126	Unassigned	0	0	0	0	1	0	2	3	1	0	0	0	0	0	0	0	2	0	0	0	0	4	0	0	2	0	0	0	0	0
OTU_11260	d__Bacteria; p__Proteobacteria; c__Gammaproteobacteria; o__Xanthomonadales; f__Xanthomonadaceae; g__unclassified; s__unclassified	0	0	0	2	0	0	0	0	0	0	0	0	0	0	0	0	0	0	0	0	0	0	0	0	0	0	0	0	0	0
OTU_11261	Unassigned	0	0	0	1	1	0	0	0	0	0	0	0	1	0	0	0	0	0	0	0	0	0	1	0	0	1	0	0	0	0
OTU_11263	Unassigned	0	0	0	1	0	0	0	0	0	0	0	0	0	0	0	0	0	0	0	0	0	0	0	0	0	0	0	0	0	0
OTU_11266	d__Bacteria; p__Proteobacteria; c__Gammaproteobacteria; o__Pseudomonadales; f__Pseudomonadaceae; g__unclassified; s__unclassified	0	0	0	1	0	0	0	0	0	0	0	0	0	0	0	0	1	0	0	0	0	0	0	0	0	0	0	0	0	0
OTU_11267	d__Bacteria; p__Actinobacteria; c__unclassified; o__unclassified; f__unclassified; g__unclassified; s__unclassified	0	0	0	1	1	0	0	0	0	0	0	0	0	0	0	0	0	0	0	0	0	0	0	0	0	0	0	0	0	0
OTU_11269	d__Bacteria; p__Actinobacteria; c__unclassified; o__unclassified; f__unclassified; g__unclassified; s__unclassified	0	0	1	1	0	0	0	1	0	0	0	1	1	0	0	0	0	0	0	0	0	0	0	0	1	0	0	0	0	0
OTU_1127	d__Bacteria; p__Proteobacteria; c__Alphaproteobacteria; o__Rhodospirillales; f__Acetobacteraceae; g__unclassified; s__unclassified	35	4	12	8	7	8	10	4	22	15	11	10	3	2	5	6	10	0	4	28	7	4	6	3	13	6	16	10	4	13
OTU_11270	d__Bacteria; p__Proteobacteria; c__Betaproteobacteria; o__Burkholderiales; f__Burkholderiaceae; g__unclassified; s__unclassified	0	0	0	2	0	0	0	0	0	0	0	0	0	0	0	0	0	0	0	0	0	0	0	0	0	0	0	0	0	0
OTU_11274	d__Bacteria; p__Proteobacteria; c__Gammaproteobacteria; o__Pseudomonadales; f__Pseudomonadaceae; g__unclassified; s__unclassified	0	0	0	2	0	0	0	0	0	0	0	0	0	0	0	0	0	0	0	0	0	0	0	0	0	0	0	0	0	0
OTU_1128	d__Bacteria; p__Proteobacteria; c__Alphaproteobacteria; o__Rhodospirillales; f__Acetobacteraceae; g__unclassified; s__unclassified	12	0	5	2	1	2	4	1	11	5	10	9	7	0	5	2	4	0	3	11	0	3	5	1	8	11	4	3	8	4
OTU_11282	Unassigned	0	0	0	1	0	0	0	0	0	0	0	0	0	0	0	2	0	0	0	0	0	0	0	0	0	0	0	0	0	0
OTU_11283	Unassigned	0	0	0	2	0	0	0	0	0	0	0	0	2	0	0	0	0	0	1	0	0	0	0	0	0	0	1	0	0	0
OTU_11285	d__Bacteria; p__Actinobacteria; c__unclassified; o__Pseudonocardiales; f__Pseudonocardiaceae; g__unclassified; s__unclassified	0	0	0	1	0	0	0	0	0	0	1	0	0	0	0	0	0	0	0	0	0	0	0	0	0	0	0	0	0	2
OTU_11287	Unassigned	0	0	0	2	0	0	1	0	0	1	0	0	0	0	0	0	0	0	0	0	0	0	0	0	0	0	0	0	0	0
OTU_1129	d__Bacteria; p__Proteobacteria; c__Betaproteobacteria; o__Burkholderiales; f__unclassified; g__unclassified; s__unclassified	11	0	0	2	0	1	0	3	1	0	0	0	0	0	0	1	0	0	0	0	0	0	0	0	0	0	0	0	0	0
OTU_11292	d__Bacteria; p__Actinobacteria; c__Rubrobacteria; o__Rubrobacterales; f__Rubrobacteraceae; g__unclassified; s__unclassified	0	0	0	2	0	0	0	0	0	0	0	0	0	0	0	3	0	0	0	0	0	0	0	0	0	0	1	0	0	0
OTU_11293	d__Bacteria; p__Planctomycetes; c__Planctomycetia; o__Planctomycetales; f__unclassified; g__unclassified; s__unclassified	0	0	0	3	0	0	0	0	0	0	0	0	0	0	0	0	0	0	0	0	0	0	0	0	0	0	0	0	0	0
OTU_11294	d__Bacteria; p__Proteobacteria; c__Alphaproteobacteria; o__Rhizobiales; f__Bradyrhizobiaceae; g__unclassified; s__unclassified	0	0	0	1	0	0	0	0	0	0	0	0	0	0	0	0	0	0	0	0	0	0	0	0	0	0	0	0	0	0
OTU_11297	d__Bacteria; p__Actinobacteria; c__unclassified; o__Streptomycetales; f__Streptomycetaceae; g__unclassified; s__unclassified	0	0	0	1	0	2	0	0	0	0	0	0	0	0	0	0	0	0	0	0	0	0	0	0	0	1	0	0	0	0
OTU_11298	d__Bacteria; p__unclassified; c__unclassified; o__unclassified; f__unclassified; g__unclassified; s__unclassified	0	0	0	1	0	0	1	0	1	0	0	0	0	0	0	0	0	0	0	0	1	0	0	3	0	0	0	0	0	0
OTU_1130	d__Bacteria; p__Planctomycetes; c__Planctomycetia; o__Planctomycetales; f__unclassified; g__unclassified; s__unclassified	16	10	9	4	8	0	6	6	2	11	10	8	3	1	1	13	3	0	2	0	4	1	8	2	15	6	19	3	4	3
OTU_11300	Unassigned	0	0	0	3	0	0	0	0	0	0	0	0	1	0	0	0	1	0	0	0	0	0	0	0	0	0	2	0	0	0
OTU_11302	d__Bacteria; p__Proteobacteria; c__Alphaproteobacteria; o__Caulobacterales; f__Caulobacteraceae; g__unclassified; s__unclassified	0	0	0	1	0	0	0	0	0	0	0	0	0	0	0	0	0	0	0	0	0	0	0	0	0	0	0	0	0	0
OTU_11308	Unassigned	0	0	0	1	0	0	0	0	0	0	0	0	0	0	0	0	0	0	0	0	0	0	0	0	0	0	0	0	0	0
OTU_1131	d__Bacteria; p__Actinobacteria; c__unclassified; o__Micrococcales; f__Micrococcaceae; g__unclassified; s__unclassified	8	0	1	1	1	0	4	0	0	4	3	0	0	1	0	0	0	0	0	0	0	0	0	0	0	0	3	0	0	1
OTU_11311	d__Bacteria; p__Actinobacteria; c__unclassified; o__Streptomycetales; f__Streptomycetaceae; g__unclassified; s__unclassified	0	0	0	0	2	0	0	0	0	0	0	0	0	0	0	0	0	0	0	0	0	0	0	0	0	0	0	0	0	0
OTU_11312	Unassigned	0	0	0	0	2	0	0	0	0	0	0	0	0	0	0	0	0	0	0	0	0	0	0	0	0	0	0	0	0	0
OTU_11313	d__Bacteria; p__Firmicutes; c__Bacilli; o__Bacillales; f__Bacillaceae; g__unclassified; s__unclassified	0	0	0	0	1	0	0	0	0	3	0	0	0	0	0	0	0	0	0	0	0	0	0	0	0	0	0	0	0	0
OTU_11316	d__Bacteria; p__Planctomycetes; c__Planctomycetia; o__Planctomycetales; f__unclassified; g__unclassified; s__unclassified	0	0	0	0	2	0	0	0	0	0	0	0	0	0	0	0	0	0	0	0	0	0	0	0	0	0	0	0	0	0
OTU_11317	Unassigned	0	0	0	0	2	0	0	0	0	0	0	0	0	0	0	0	0	0	0	0	0	0	0	0	0	0	0	0	0	0
OTU_1132	d__Bacteria; p__Actinobacteria; c__unclassified; o__Streptomycetales; f__Streptomycetaceae; g__unclassified; s__unclassified	15	2	3	1	3	3	0	0	0	0	3	2	3	2	0	1	1	0	2	1	0	1	0	2	0	1	0	0	1	0
OTU_11320	d__Bacteria; p__Planctomycetes; c__Planctomycetia; o__Planctomycetales; f__Isosphaeraceae; g__unclassified; s__unclassified	0	0	0	0	2	0	0	2	0	0	0	0	0	0	0	0	0	0	0	0	0	0	0	0	0	0	0	0	0	0
OTU_11322	d__Bacteria; p__Proteobacteria; c__unclassified; o__unclassified; f__unclassified; g__unclassified; s__unclassified	0	0	0	0	2	0	0	0	0	0	0	0	0	0	0	0	0	0	0	0	0	0	0	0	0	0	0	0	0	0
OTU_11324	d__Bacteria; p__Cyanobacteria; c__Nostocales; o__Nostocales; f__Nostocaceae; g__unclassified; s__unclassified	1	1	0	0	2	0	0	0	1	2	0	1	0	0	0	1	1	0	0	0	0	0	0	0	0	3	0	0	0	0
OTU_11325	d__Bacteria; p__Planctomycetes; c__unclassified; o__unclassified; f__unclassified; g__unclassified; s__unclassified	0	0	0	0	1	0	0	0	0	0	0	0	0	0	0	0	0	0	0	0	0	0	0	0	0	0	0	0	0	0
OTU_11327	d__Bacteria; p__Planctomycetes; c__Planctomycetia; o__Planctomycetales; f__Isosphaeraceae; g__unclassified; s__unclassified	0	0	0	0	2	0	0	0	0	0	0	0	0	0	0	0	0	0	0	0	0	0	0	0	0	0	0	0	0	0
OTU_11328	Unassigned	0	0	0	0	2	0	0	0	0	0	0	0	0	0	0	0	0	0	0	0	0	0	0	0	0	0	0	0	0	0
OTU_11329	d__Bacteria; p__Proteobacteria; c__Alphaproteobacteria; o__Rhizobiales; f__Bradyrhizobiaceae; g__unclassified; s__unclassified	0	0	0	0	1	0	0	0	0	0	0	0	0	0	0	0	1	0	0	0	0	0	0	0	0	0	0	0	0	0
OTU_1133	Unassigned	5	0	0	13	8	0	9	9	1	15	2	2	0	0	0	4	4	0	0	1	1	0	3	2	0	3	13	0	0	1
OTU_11330	d__Bacteria; p__Actinobacteria; c__unclassified; o__Streptomycetales; f__Streptomycetaceae; g__unclassified; s__unclassified	0	0	0	0	2	0	0	0	0	0	0	0	0	0	0	0	0	0	0	0	0	0	0	0	0	0	0	0	0	0
OTU_11331	Unassigned	0	0	0	0	2	1	0	0	0	0	0	0	0	0	0	0	0	0	0	0	0	0	0	0	0	0	0	0	0	0
OTU_11334	d__Bacteria; p__unclassified; c__unclassified; o__unclassified; f__unclassified; g__unclassified; s__unclassified	0	0	0	0	2	0	0	0	0	0	0	0	0	0	0	0	0	0	0	0	0	0	0	0	0	0	0	0	0	0
OTU_11335	d__Bacteria; p__Actinobacteria; c__unclassified; o__Streptomycetales; f__Streptomycetaceae; g__unclassified; s__unclassified	0	0	0	0	3	0	0	0	0	0	0	0	0	0	0	0	0	0	0	0	0	0	0	0	0	0	0	0	0	0
OTU_11336	d__Bacteria; p__Actinobacteria; c__Rubrobacteria; o__Rubrobacterales; f__Rubrobacteraceae; g__unclassified; s__unclassified	0	0	0	0	1	0	0	0	0	0	0	0	0	0	0	0	0	0	0	0	0	0	0	0	0	0	0	0	0	0
OTU_11337	Unassigned	0	0	0	0	1	0	0	0	0	0	0	0	0	0	0	0	0	0	0	0	0	0	0	0	0	0	0	0	0	0
OTU_11338	Unassigned	0	0	0	0	0	0	0	0	0	0	0	0	0	0	1	0	0	0	1	0	0	0	0	0	0	0	0	0	0	0
OTU_11339	d__Bacteria; p__Planctomycetes; c__Planctomycetia; o__Planctomycetales; f__unclassified; g__unclassified; s__unclassified	0	0	0	0	1	0	0	0	0	0	0	0	0	0	0	0	0	0	0	0	0	0	0	0	0	0	0	0	0	0
OTU_1134	d__Bacteria; p__Actinobacteria; c__unclassified; o__Frankiales; f__Frankiaceae; g__unclassified; s__unclassified	16	2	0	0	2	0	4	0	0	1	1	0	3	0	0	0	7	0	0	0	0	0	0	0	0	0	1	2	0	0
OTU_11341	Unassigned	0	0	0	0	1	0	0	0	0	0	0	0	0	0	0	0	0	0	0	0	0	0	0	0	0	0	0	0	0	0
OTU_11342	Unassigned	0	0	0	0	2	2	0	0	0	0	0	0	0	0	0	0	0	0	0	0	0	0	0	0	0	0	0	0	0	0
OTU_11343	d__Bacteria; p__Actinobacteria; c__unclassified; o__unclassified; f__unclassified; g__unclassified; s__unclassified	0	0	0	0	1	0	0	0	0	0	0	0	0	0	0	0	0	0	0	0	0	0	0	0	0	0	0	0	0	0
OTU_11344	d__Bacteria; p__Proteobacteria; c__Alphaproteobacteria; o__Caulobacterales; f__Caulobacteraceae; g__unclassified; s__unclassified	0	1	0	0	2	0	0	2	1	0	2	0	0	0	0	2	1	0	0	0	0	0	0	0	0	0	0	0	1	0
OTU_11345	Unassigned	0	0	0	0	0	0	0	0	0	0	0	0	0	0	0	0	0	0	0	0	0	0	0	1	0	0	0	0	0	0
OTU_11346	d__Bacteria; p__unclassified; c__unclassified; o__unclassified; f__unclassified; g__unclassified; s__unclassified	0	0	0	0	2	0	0	0	0	0	0	0	0	0	0	0	0	0	0	0	0	0	0	0	0	0	0	0	0	0
OTU_11347	d__Bacteria; p__Actinobacteria; c__unclassified; o__Streptomycetales; f__Streptomycetaceae; g__unclassified; s__unclassified	0	0	0	0	2	0	0	0	0	0	0	0	0	0	0	0	1	0	0	0	0	0	0	0	0	0	1	1	0	0
OTU_1135	Unassigned	10	11	2	0	9	1	0	1	0	4	5	0	2	0	3	4	0	0	0	1	1	1	0	2	0	2	1	2	5	1
OTU_11351	d__Bacteria; p__unclassified; c__unclassified; o__unclassified; f__unclassified; g__unclassified; s__unclassified	1	1	0	0	3	0	0	0	1	1	0	1	0	0	0	0	0	0	2	0	0	0	0	0	0	0	1	0	0	0
OTU_11353	d__Bacteria; p__unclassified; c__unclassified; o__unclassified; f__unclassified; g__unclassified; s__unclassified	1	0	0	0	1	0	0	0	0	0	0	0	0	0	0	0	0	0	0	0	0	0	0	0	0	0	0	0	0	0
OTU_11354	d__Bacteria; p__unclassified; c__unclassified; o__unclassified; f__unclassified; g__unclassified; s__unclassified	0	0	0	0	1	1	0	0	0	0	0	0	0	0	0	0	0	0	0	0	0	0	0	0	0	0	0	0	0	0
OTU_11355	d__Bacteria; p__unclassified; c__unclassified; o__unclassified; f__unclassified; g__unclassified; s__unclassified	0	0	0	0	2	0	0	0	0	0	0	0	0	0	0	0	0	0	0	0	0	0	0	0	0	0	0	0	0	0
OTU_11357	d__Bacteria; p__Actinobacteria; c__unclassified; o__Streptomycetales; f__Streptomycetaceae; g__unclassified; s__unclassified	0	0	0	0	2	0	0	0	0	0	0	0	0	0	0	0	0	0	0	0	0	0	0	0	0	1	0	0	0	0
OTU_11359	d__Bacteria; p__Proteobacteria; c__Alphaproteobacteria; o__Caulobacterales; f__Caulobacteraceae; g__Phenylobacterium; s__unclassified	0	0	0	0	2	0	0	0	0	0	0	0	0	0	0	0	0	0	0	0	0	0	0	0	0	0	0	0	0	0
OTU_1136	d__Bacteria; p__Planctomycetes; c__Planctomycetia; o__Planctomycetales; f__Isosphaeraceae; g__unclassified; s__unclassified	0	12	0	0	4	0	3	0	0	2	2	0	0	0	0	0	0	0	0	0	3	0	1	11	0	0	6	0	1	0
OTU_11360	d__Bacteria; p__Actinobacteria; c__unclassified; o__Streptomycetales; f__Streptomycetaceae; g__unclassified; s__unclassified	1	1	0	0	3	0	0	0	0	0	0	0	0	0	0	0	0	0	0	0	0	0	0	0	0	0	1	0	0	0
OTU_11361	d__Bacteria; p__Proteobacteria; c__unclassified; o__unclassified; f__unclassified; g__unclassified; s__unclassified	0	0	0	0	1	0	0	0	0	0	0	0	0	0	0	0	0	0	0	0	0	0	0	0	0	0	0	0	0	0
OTU_11364	Unassigned	0	0	0	0	2	0	0	0	0	0	0	0	0	0	0	0	0	0	0	0	0	0	0	0	0	0	0	0	0	0
OTU_11365	d__Bacteria; p__Actinobacteria; c__unclassified; o__Streptomycetales; f__Streptomycetaceae; g__unclassified; s__unclassified	0	0	0	0	1	0	0	0	0	0	0	0	0	0	0	0	0	0	0	0	0	0	0	0	0	0	0	0	0	0
OTU_11366	Unassigned	0	0	0	0	1	0	0	0	0	0	0	0	0	0	0	0	0	0	0	0	0	0	0	0	0	0	0	0	0	0
OTU_11367	d__Bacteria; p__Planctomycetes; c__Planctomycetia; o__Planctomycetales; f__Isosphaeraceae; g__unclassified; s__unclassified	0	0	0	0	2	0	0	0	0	0	0	0	0	0	0	0	0	0	0	0	0	0	0	0	0	0	0	0	0	0
OTU_11368	d__Bacteria; p__Proteobacteria; c__Alphaproteobacteria; o__Rhizobiales; f__Bradyrhizobiaceae; g__unclassified; s__unclassified	0	0	0	0	1	0	0	0	0	0	0	0	0	0	0	0	0	0	0	0	0	0	0	0	0	0	0	0	0	0
OTU_1137	d__Bacteria; p__Actinobacteria; c__unclassified; o__Streptomycetales; f__Streptomycetaceae; g__unclassified; s__unclassified	7	12	3	0	6	3	6	11	0	14	9	0	1	0	0	3	7	0	0	0	0	0	0	0	0	3	1	4	1	8
OTU_11371	Unassigned	0	0	0	0	1	0	0	0	0	0	0	0	0	0	0	0	0	0	0	0	0	0	0	0	0	0	0	0	0	0
OTU_11372	Unassigned	0	0	0	0	2	1	0	1	0	0	0	0	0	0	0	1	2	0	0	0	0	0	0	0	0	0	0	0	0	0
OTU_11373	d__Bacteria; p__Actinobacteria; c__unclassified; o__Streptomycetales; f__Streptomycetaceae; g__Streptomyces; s__unclassified	0	0	0	0	1	0	0	0	0	0	0	0	0	0	0	0	0	0	0	0	0	0	0	0	0	0	0	0	0	0
OTU_11374	d__Bacteria; p__Actinobacteria; c__unclassified; o__Streptomycetales; f__Streptomycetaceae; g__unclassified; s__unclassified	0	0	0	0	1	0	0	0	0	0	0	0	1	0	0	0	0	0	0	0	0	0	0	0	0	0	1	0	0	0
OTU_11375	d__Bacteria; p__Proteobacteria; c__Gammaproteobacteria; o__Xanthomonadales; f__Xanthomonadaceae; g__unclassified; s__unclassified	0	0	0	0	1	0	0	0	0	2	0	0	0	0	0	0	0	0	0	0	0	0	0	0	0	0	0	0	2	0
OTU_11376	d__Bacteria; p__Actinobacteria; c__unclassified; o__Streptomycetales; f__Streptomycetaceae; g__unclassified; s__unclassified	0	0	0	0	1	0	0	0	0	1	0	0	0	0	0	0	0	0	0	0	0	0	0	0	0	0	0	0	0	0
OTU_11377	d__Bacteria; p__Planctomycetes; c__unclassified; o__unclassified; f__unclassified; g__unclassified; s__unclassified	0	0	0	1	2	0	0	0	0	0	0	0	0	0	0	0	0	0	0	0	0	0	0	0	0	0	0	0	0	0
OTU_11378	d__Bacteria; p__Proteobacteria; c__Alphaproteobacteria; o__Rhizobiales; f__Bradyrhizobiaceae; g__unclassified; s__unclassified	0	0	0	0	1	0	0	0	0	0	0	0	0	0	0	0	0	0	0	0	0	0	0	0	0	0	0	0	0	0
OTU_1138	Unassigned	1	9	0	0	3	2	6	7	0	2	8	0	0	0	0	7	6	0	1	0	0	0	0	0	0	0	0	0	0	0
OTU_11380	Unassigned	0	0	0	0	2	0	0	0	0	0	0	0	0	0	0	0	0	0	0	0	0	0	0	0	0	0	0	0	0	0
OTU_11382	d__Bacteria; p__Actinobacteria; c__unclassified; o__Streptomycetales; f__Streptomycetaceae; g__unclassified; s__unclassified	0	0	0	0	1	0	0	0	0	4	1	0	0	0	0	0	0	0	0	0	0	0	0	0	0	0	0	0	0	0
OTU_11383	Unassigned	0	0	0	0	1	0	0	0	0	0	0	0	0	0	0	0	0	0	0	0	0	0	0	0	0	0	0	0	0	0
OTU_11384	Unassigned	0	0	0	0	2	0	0	0	0	0	0	0	0	0	0	0	0	0	0	0	0	0	0	0	0	0	0	0	0	0
OTU_11385	d__Bacteria; p__Actinobacteria; c__unclassified; o__Streptomycetales; f__Streptomycetaceae; g__unclassified; s__unclassified	0	0	0	0	1	0	0	0	0	0	0	0	0	0	0	0	0	0	0	0	0	0	0	0	0	0	0	0	0	0
OTU_11386	Unassigned	0	2	0	2	1	0	0	0	0	0	1	0	0	0	0	0	0	0	0	0	0	0	0	0	0	0	0	0	0	0
OTU_11387	d__Bacteria; p__Proteobacteria; c__Alphaproteobacteria; o__Caulobacterales; f__Caulobacteraceae; g__unclassified; s__unclassified	1	0	0	0	1	0	0	0	0	0	0	0	0	0	0	0	0	0	0	0	0	0	0	0	0	0	0	0	0	0
OTU_11388	d__Bacteria; p__unclassified; c__unclassified; o__unclassified; f__unclassified; g__unclassified; s__unclassified	0	0	0	0	2	0	0	0	0	0	1	0	0	0	0	0	0	0	0	0	0	0	0	0	0	0	0	0	0	0
OTU_1139	d__Bacteria; p__Planctomycetes; c__Planctomycetia; o__Planctomycetales; f__Isosphaeraceae; g__unclassified; s__unclassified	3	13	0	7	14	7	1	12	0	6	1	2	0	0	0	11	7	2	0	0	2	0	0	6	0	0	0	0	1	0
OTU_11390	d__Bacteria; p__Actinobacteria; c__unclassified; o__unclassified; f__unclassified; g__unclassified; s__unclassified	0	0	0	0	2	0	0	0	0	0	0	0	0	0	0	0	0	0	0	0	0	0	0	0	0	0	0	0	0	0
OTU_11392	d__Bacteria; p__Proteobacteria; c__Betaproteobacteria; o__Burkholderiales; f__Comamonadaceae; g__unclassified; s__unclassified	0	0	0	0	2	0	0	0	0	0	0	0	0	0	0	0	0	0	0	0	0	0	0	0	0	0	0	0	0	0
OTU_11394	d__Bacteria; p__Planctomycetes; c__Planctomycetia; o__Planctomycetales; f__Isosphaeraceae; g__unclassified; s__unclassified	0	0	0	0	2	1	0	0	1	1	0	0	0	0	0	0	0	0	0	0	0	0	0	0	0	0	0	0	0	0
OTU_11397	d__Bacteria; p__Planctomycetes; c__Planctomycetia; o__Planctomycetales; f__Isosphaeraceae; g__unclassified; s__unclassified	0	0	0	0	3	0	0	0	0	0	0	0	0	0	0	0	0	0	0	0	0	0	0	0	0	0	0	0	0	0
OTU_11398	Unassigned	0	0	0	0	2	0	1	1	0	0	0	0	0	0	0	0	0	0	0	0	0	0	0	0	0	0	0	0	0	0
OTU_114	Unassigned	6	1	4	6	0	4	6	1	27	0	3	37	8	14	15	1	6	4	25	14	18	9	102	58	3	16	2	13	29	18
OTU_1140	d__Bacteria; p__Actinobacteria; c__unclassified; o__Streptomycetales; f__Streptomycetaceae; g__unclassified; s__unclassified	11	2	19	0	11	5	2	5	5	5	9	13	11	8	2	4	8	3	2	8	9	7	6	7	3	15	5	14	13	4
OTU_11401	Unassigned	0	0	0	0	2	0	0	1	0	0	0	0	0	0	0	0	1	0	0	0	0	0	0	0	0	0	0	0	0	0
OTU_11404	d__Bacteria; p__unclassified; c__unclassified; o__unclassified; f__unclassified; g__unclassified; s__unclassified	0	0	0	0	1	0	0	0	0	1	0	0	0	0	0	0	0	0	0	0	0	0	0	0	0	0	0	0	0	0
OTU_11405	d__Bacteria; p__Proteobacteria; c__Gammaproteobacteria; o__Pseudomonadales; f__Pseudomonadaceae; g__unclassified; s__unclassified	1	0	0	0	2	0	0	0	1	0	0	0	0	0	0	0	0	0	0	0	0	0	0	0	0	1	1	0	0	0
OTU_11407	d__Bacteria; p__Proteobacteria; c__Gammaproteobacteria; o__Pseudomonadales; f__Pseudomonadaceae; g__unclassified; s__unclassified	0	0	0	0	3	0	0	0	0	0	0	0	0	0	0	0	0	0	0	0	0	0	0	0	0	0	0	0	0	0
OTU_11409	d__Bacteria; p__Planctomycetes; c__Planctomycetia; o__Planctomycetales; f__unclassified; g__unclassified; s__unclassified	1	0	0	0	1	0	0	0	0	1	0	0	0	0	0	0	0	0	0	0	0	0	0	0	0	0	0	0	1	0
OTU_1141	d__Bacteria; p__Planctomycetes; c__Planctomycetia; o__Planctomycetales; f__unclassified; g__unclassified; s__unclassified	1	1	5	2	1	0	0	0	3	2	1	3	5	3	2	0	2	3	10	4	2	2	14	5	7	5	8	3	3	3
OTU_11410	Unassigned	0	0	0	0	1	0	0	1	0	0	0	0	0	0	0	0	0	0	0	0	0	0	0	0	0	0	0	0	0	0
OTU_11415	d__Bacteria; p__Planctomycetes; c__Planctomycetia; o__Planctomycetales; f__Isosphaeraceae; g__unclassified; s__unclassified	0	0	0	0	3	0	0	0	0	0	0	0	0	0	0	0	0	0	0	0	0	0	0	0	0	0	0	0	0	0
OTU_11417	d__Bacteria; p__Planctomycetes; c__Planctomycetia; o__Planctomycetales; f__Gemmataceae; g__unclassified; s__unclassified	1	0	0	0	2	0	0	0	0	0	0	0	0	0	0	0	0	0	0	0	0	0	0	0	0	1	0	0	0	0
OTU_11418	d__Bacteria; p__Proteobacteria; c__Gammaproteobacteria; o__Xanthomonadales; f__Xanthomonadaceae; g__unclassified; s__unclassified	0	2	0	0	1	0	0	0	0	0	0	0	0	0	0	0	1	0	0	0	0	0	0	0	0	0	0	0	0	0
OTU_1142	d__Bacteria; p__unclassified; c__unclassified; o__unclassified; f__unclassified; g__unclassified; s__unclassified	2	1	0	11	2	0	1	1	0	3	0	0	0	0	0	4	4	1	0	0	0	0	2	1	0	0	0	0	4	0
OTU_11422	d__Bacteria; p__Actinobacteria; c__unclassified; o__Streptomycetales; f__Streptomycetaceae; g__unclassified; s__unclassified	0	0	0	0	2	0	0	1	0	0	0	0	0	0	0	0	0	0	0	0	0	0	0	0	0	0	0	0	0	0
OTU_11424	Unassigned	0	0	0	0	3	0	0	0	0	0	0	0	0	0	0	0	0	0	0	0	0	0	0	0	0	0	0	0	0	0
OTU_11425	d__Bacteria; p__Actinobacteria; c__unclassified; o__Streptomycetales; f__Streptomycetaceae; g__unclassified; s__unclassified	0	0	0	0	2	0	0	0	0	0	0	0	0	0	0	0	0	0	0	0	0	0	0	0	0	0	0	0	0	0
OTU_11426	Unassigned	0	0	0	0	2	0	0	0	0	0	2	0	0	0	0	0	0	0	0	0	0	0	0	0	0	0	0	0	0	0
OTU_11427	d__Bacteria; p__Planctomycetes; c__Planctomycetia; o__Planctomycetales; f__Isosphaeraceae; g__unclassified; s__unclassified	0	0	0	0	2	0	0	0	0	0	0	0	0	0	0	0	0	0	0	0	0	0	0	0	0	0	0	0	0	0
OTU_11428	Unassigned	0	0	0	0	2	0	0	0	0	0	0	0	0	0	0	1	1	0	0	0	0	0	0	0	0	0	0	0	0	0
OTU_11429	d__Bacteria; p__Proteobacteria; c__Gammaproteobacteria; o__Xanthomonadales; f__Xanthomonadaceae; g__unclassified; s__unclassified	0	0	0	0	2	0	0	0	0	0	2	0	0	0	0	0	2	1	0	0	0	0	0	0	0	0	0	0	0	0
OTU_1143	d__Bacteria; p__unclassified; c__unclassified; o__unclassified; f__unclassified; g__unclassified; s__unclassified	3	3	6	6	12	11	4	3	1	1	3	4	2	0	0	7	10	7	3	5	3	1	2	2	1	6	2	2	0	9
OTU_11430	d__Bacteria; p__Planctomycetes; c__Planctomycetia; o__Planctomycetales; f__unclassified; g__unclassified; s__unclassified	0	0	0	0	1	0	0	0	0	0	0	0	0	0	0	0	0	0	0	0	0	0	0	0	0	0	0	0	0	0
OTU_11431	Unassigned	0	0	0	0	2	0	0	1	0	0	0	0	0	0	0	0	0	0	0	0	0	0	0	0	0	0	1	0	0	0
OTU_11434	d__Bacteria; p__Proteobacteria; c__Alphaproteobacteria; o__Rhizobiales; f__Bradyrhizobiaceae; g__unclassified; s__unclassified	0	0	0	0	1	0	0	0	0	0	0	0	0	0	0	0	0	0	0	0	1	0	0	0	0	0	0	0	1	0
OTU_11435	d__Bacteria; p__Actinobacteria; c__unclassified; o__Streptomycetales; f__Streptomycetaceae; g__unclassified; s__unclassified	0	2	1	0	2	0	0	0	0	0	0	0	1	0	0	0	1	0	0	2	0	0	0	1	0	0	0	0	1	0
OTU_11436	d__Bacteria; p__Proteobacteria; c__Alphaproteobacteria; o__Rhodospirillales; f__Acetobacteraceae; g__unclassified; s__unclassified	0	0	1	0	2	0	0	0	0	0	0	0	0	0	0	0	0	0	0	0	1	0	0	0	0	0	0	0	0	0
OTU_11437	d__Bacteria; p__Actinobacteria; c__unclassified; o__Streptomycetales; f__Streptomycetaceae; g__unclassified; s__unclassified	0	0	0	0	2	0	0	0	0	0	0	0	0	0	0	0	0	0	0	0	0	0	0	0	0	0	0	0	0	0
OTU_1144	d__Bacteria; p__Actinobacteria; c__unclassified; o__Streptomycetales; f__Streptomycetaceae; g__unclassified; s__unclassified	8	4	0	1	0	3	0	7	12	0	4	2	10	8	7	2	1	4	7	0	1	9	1	4	5	10	3	8	2	3
OTU_11440	d__Bacteria; p__Planctomycetes; c__unclassified; o__unclassified; f__unclassified; g__unclassified; s__unclassified	0	0	0	0	0	1	0	0	0	0	0	0	0	1	0	0	0	0	0	0	0	0	0	0	0	0	0	0	1	0
OTU_11441	d__Bacteria; p__Actinobacteria; c__unclassified; o__Micromonosporales; f__Micromonosporaceae; g__unclassified; s__unclassified	0	0	0	0	2	0	0	0	0	0	1	0	0	0	0	0	0	0	0	0	0	0	0	0	0	0	0	0	0	0
OTU_11443	d__Bacteria; p__Planctomycetes; c__Planctomycetia; o__Planctomycetales; f__unclassified; g__unclassified; s__unclassified	0	0	0	0	1	0	0	0	0	0	0	0	0	0	0	0	0	0	0	0	0	0	0	0	0	0	0	0	0	0
OTU_11445	Unassigned	0	0	0	0	1	0	0	0	0	0	0	0	0	0	0	0	0	0	0	0	0	0	0	0	0	0	0	0	0	0
OTU_11449	d__Bacteria; p__Actinobacteria; c__unclassified; o__unclassified; f__unclassified; g__unclassified; s__unclassified	0	0	0	0	3	0	0	0	0	0	0	2	0	0	0	0	0	0	0	0	0	0	0	0	0	0	0	0	0	0
OTU_1145	d__Bacteria; p__unclassified; c__unclassified; o__unclassified; f__unclassified; g__unclassified; s__unclassified	0	0	0	0	0	0	0	0	0	0	0	0	0	0	0	0	0	0	0	0	0	0	0	0	0	0	0	0	0	0
OTU_11450	Unassigned	0	0	0	0	2	0	0	0	0	0	0	0	0	0	0	0	0	0	0	0	0	0	0	0	0	0	0	0	0	0
OTU_11451	Unassigned	0	0	0	0	2	0	0	0	0	0	0	0	0	0	0	0	0	0	0	0	0	0	0	0	0	0	0	0	0	0
OTU_11452	d__Bacteria; p__Planctomycetes; c__Planctomycetia; o__Planctomycetales; f__unclassified; g__unclassified; s__unclassified	0	0	0	0	2	0	0	0	0	0	0	0	0	0	0	0	0	0	0	0	0	0	0	0	0	0	0	0	0	0
OTU_11453	d__Bacteria; p__Actinobacteria; c__unclassified; o__Streptomycetales; f__Streptomycetaceae; g__unclassified; s__unclassified	0	0	0	0	1	0	0	0	0	1	0	0	0	0	0	0	0	0	0	0	0	0	0	0	0	0	0	0	0	0
OTU_11456	Unassigned	0	0	0	0	3	0	0	0	0	0	0	0	0	0	0	0	0	0	0	0	0	0	0	0	0	0	0	0	0	0
OTU_11458	Unassigned	0	0	0	0	2	0	1	2	0	0	0	0	0	0	0	0	0	0	0	0	0	0	0	0	0	0	0	0	0	0
OTU_1146	d__Bacteria; p__Proteobacteria; c__Alphaproteobacteria; o__Rhodospirillales; f__Acetobacteraceae; g__unclassified; s__unclassified	6	7	18	16	7	9	8	10	19	4	9	24	28	2	4	6	5	0	9	6	3	10	7	10	6	12	11	3	17	2
OTU_11461	d__Bacteria; p__Actinobacteria; c__unclassified; o__Streptomycetales; f__Streptomycetaceae; g__unclassified; s__unclassified	1	0	0	0	1	0	0	0	0	1	2	0	1	0	0	0	1	0	0	0	0	0	0	0	0	0	0	0	0	0
OTU_11462	Unassigned	0	0	0	0	1	0	0	0	0	0	0	0	0	0	0	0	0	0	0	0	0	0	0	0	0	0	0	0	0	0
OTU_11464	Unassigned	2	0	0	0	1	0	0	1	0	0	0	0	0	0	0	0	0	0	0	0	0	0	0	0	0	0	0	0	0	0
OTU_11465	Unassigned	0	0	0	0	2	0	0	0	0	0	0	0	0	0	0	0	0	0	0	0	0	0	0	0	0	0	0	0	0	0
OTU_11466	Unassigned	0	0	0	1	1	1	0	0	0	1	0	0	0	0	0	0	1	0	0	0	0	0	0	0	0	0	0	0	0	0
OTU_11467	d__Bacteria; p__Planctomycetes; c__unclassified; o__unclassified; f__unclassified; g__unclassified; s__unclassified	0	0	0	0	2	0	0	0	0	0	0	0	0	0	0	0	0	0	0	0	0	0	0	0	0	0	0	0	0	0
OTU_11469	d__Bacteria; p__Actinobacteria; c__unclassified; o__Streptomycetales; f__Streptomycetaceae; g__unclassified; s__unclassified	0	0	0	3	1	0	0	0	0	0	0	0	0	0	0	0	0	0	0	0	0	0	0	0	0	0	0	0	0	0
OTU_1147	d__Bacteria; p__Proteobacteria; c__Gammaproteobacteria; o__Pseudomonadales; f__Pseudomonadaceae; g__unclassified; s__unclassified	0	0	0	0	0	0	0	0	0	0	0	1	0	0	0	0	0	0	0	0	1	0	0	0	0	0	0	0	0	1
OTU_11472	d__Bacteria; p__Planctomycetes; c__Planctomycetia; o__Planctomycetales; f__Isosphaeraceae; g__unclassified; s__unclassified	0	0	0	0	2	0	0	0	0	0	0	0	0	0	0	0	0	0	0	0	0	0	0	0	0	0	0	0	0	0
OTU_11473	Unassigned	0	0	0	0	1	0	0	0	0	0	0	0	0	0	0	0	0	0	0	0	0	0	0	0	0	0	0	0	0	0
OTU_11475	Unassigned	0	0	0	0	2	0	0	0	0	0	0	0	0	0	0	0	0	0	0	0	0	0	0	0	0	0	0	0	0	0
OTU_11476	Unassigned	0	2	0	0	1	1	1	0	0	4	0	0	0	0	0	0	0	0	0	0	0	0	0	0	0	0	0	0	0	0
OTU_11477	d__Bacteria; p__Actinobacteria; c__unclassified; o__Streptomycetales; f__Streptomycetaceae; g__unclassified; s__unclassified	0	0	0	0	1	0	0	0	0	0	0	0	0	0	0	0	0	0	0	0	0	0	0	0	0	0	0	0	0	0
OTU_11478	d__Bacteria; p__Actinobacteria; c__unclassified; o__unclassified; f__unclassified; g__unclassified; s__unclassified	0	0	0	0	1	0	0	0	0	0	0	0	0	0	0	0	0	0	0	0	0	0	0	0	0	0	0	0	0	0
OTU_1148	d__Bacteria; p__unclassified; c__unclassified; o__unclassified; f__unclassified; g__unclassified; s__unclassified	0	0	0	0	0	0	0	0	0	0	0	0	0	0	0	0	0	0	0	0	0	4	0	0	0	0	0	0	0	0
OTU_11481	Unassigned	0	0	0	0	3	0	0	0	0	1	0	0	0	0	0	0	0	0	0	0	0	0	0	1	0	0	0	0	0	0
OTU_11482	Unassigned	0	0	0	0	1	0	0	0	0	0	0	0	0	0	0	0	0	0	0	0	0	0	0	0	0	0	0	0	0	0
OTU_11483	d__Bacteria; p__Proteobacteria; c__Alphaproteobacteria; o__Rhizobiales; f__Bradyrhizobiaceae; g__unclassified; s__unclassified	0	0	0	0	2	0	0	0	0	0	0	0	0	0	0	0	0	0	0	0	0	0	0	0	0	0	0	0	0	0
OTU_11485	d__Bacteria; p__Proteobacteria; c__Gammaproteobacteria; o__Pseudomonadales; f__Pseudomonadaceae; g__unclassified; s__unclassified	0	0	0	0	0	0	0	0	0	0	0	0	0	0	0	0	0	0	0	0	0	0	0	0	0	0	0	0	0	0
OTU_1149	d__Bacteria; p__Planctomycetes; c__Planctomycetia; o__Planctomycetales; f__Isosphaeraceae; g__Paludisphaera; s__unclassified	9	3	0	23	5	1	1	0	6	5	2	9	3	0	3	0	6	0	2	0	5	0	5	6	1	7	2	9	5	4
OTU_11490	Unassigned	0	0	0	0	0	1	0	0	0	0	0	0	0	0	0	0	0	0	0	0	0	0	0	0	0	0	0	0	0	0
OTU_11494	d__Bacteria; p__Actinobacteria; c__unclassified; o__Streptomycetales; f__Streptomycetaceae; g__unclassified; s__unclassified	0	0	0	0	0	1	0	1	0	0	0	0	0	0	0	0	0	0	0	0	0	0	0	0	0	0	0	0	0	0
OTU_11496	d__Bacteria; p__unclassified; c__unclassified; o__unclassified; f__unclassified; g__unclassified; s__unclassified	0	0	0	0	0	1	0	0	0	1	0	0	0	0	0	0	0	0	0	0	0	0	0	0	0	0	0	0	0	0
OTU_11498	Unassigned	0	0	0	0	0	2	0	0	0	0	0	0	0	0	0	0	0	0	0	0	0	0	2	0	0	0	0	0	0	0
OTU_11499	Unassigned	0	0	0	0	0	1	0	0	0	0	0	0	0	0	0	0	0	0	0	0	0	0	0	0	0	0	0	0	0	0
OTU_115	d__Bacteria; p__Proteobacteria; c__Gammaproteobacteria; o__Xanthomonadales; f__Xanthomonadaceae; g__unclassified; s__unclassified	2	3	6	0	0	5	3	8	4	0	0	0	2	5	9	0	0	0	2	0	0	0	0	5	0	0	11	5	0	18
OTU_1150	d__Bacteria; p__Proteobacteria; c__Gammaproteobacteria; o__Pseudomonadales; f__Pseudomonadaceae; g__unclassified; s__unclassified	3	0	2	3	0	3	0	1	8	1	1	7	1	5	0	0	3	0	0	1	0	7	1	7	0	3	4	10	7	4
OTU_11500	d__Bacteria; p__Firmicutes; c__Bacilli; o__Bacillales; f__Bacillaceae; g__unclassified; s__unclassified	0	0	0	0	0	1	0	0	0	0	0	0	0	0	0	0	0	0	0	0	0	0	0	0	0	0	0	0	0	0
OTU_11501	Unassigned	0	0	0	0	0	2	0	2	1	0	0	0	0	0	0	0	2	0	0	0	0	0	0	0	0	0	0	1	0	0
OTU_11503	d__Bacteria; p__Actinobacteria; c__unclassified; o__Streptomycetales; f__Streptomycetaceae; g__unclassified; s__unclassified	0	0	0	0	0	1	0	0	0	0	0	0	0	0	0	0	0	0	0	0	0	0	0	0	0	0	0	0	0	0
OTU_11505	Unassigned	0	0	0	0	0	1	0	0	0	0	0	0	0	0	0	0	0	0	0	0	0	0	0	0	0	0	0	0	0	0
OTU_11507	Unassigned	0	0	0	0	0	2	0	0	0	0	0	0	0	0	0	0	0	0	0	0	0	0	0	0	0	0	0	0	0	0
OTU_1151	d__Bacteria; p__Proteobacteria; c__Alphaproteobacteria; o__Rhodospirillales; f__Acetobacteraceae; g__unclassified; s__unclassified	6	6	0	0	3	7	2	2	13	7	13	4	13	0	1	1	4	1	3	7	0	4	1	3	1	13	1	4	9	2
OTU_11510	d__Bacteria; p__Actinobacteria; c__unclassified; o__Streptomycetales; f__Streptomycetaceae; g__unclassified; s__unclassified	0	0	0	0	0	2	0	1	0	0	0	0	0	0	0	0	0	0	0	0	0	0	0	0	0	0	0	0	0	1
OTU_11513	d__Bacteria; p__Actinobacteria; c__unclassified; o__unclassified; f__unclassified; g__unclassified; s__unclassified	0	0	0	0	0	1	0	0	0	0	0	0	0	0	0	0	0	0	0	0	0	0	0	0	0	0	0	0	0	0
OTU_11515	d__Bacteria; p__Firmicutes; c__Bacilli; o__Bacillales; f__Bacillaceae; g__unclassified; s__unclassified	0	0	0	0	0	1	0	1	0	1	1	0	0	0	0	0	0	0	0	0	0	0	0	0	0	0	0	0	0	0
OTU_11516	Unassigned	0	0	0	0	0	1	0	0	0	0	0	0	0	0	0	0	0	0	0	0	0	0	0	0	0	0	0	0	0	0
OTU_11517	d__Bacteria; p__Proteobacteria; c__Alphaproteobacteria; o__Rhizobiales; f__Bradyrhizobiaceae; g__Bradyrhizobium; s__unclassified	0	0	0	0	0	1	0	0	0	0	0	0	0	0	0	0	0	0	0	0	0	0	0	0	0	0	0	0	0	0
OTU_11518	d__Bacteria; p__Actinobacteria; c__unclassified; o__Streptomycetales; f__Streptomycetaceae; g__unclassified; s__unclassified	0	0	0	0	0	1	0	0	0	0	0	0	0	0	0	0	0	0	0	0	0	0	0	0	0	0	0	0	0	0
OTU_11519	d__Bacteria; p__Actinobacteria; c__unclassified; o__Streptomycetales; f__Streptomycetaceae; g__unclassified; s__unclassified	0	0	0	0	0	1	0	0	0	0	0	0	1	0	0	0	0	2	0	0	0	0	0	0	0	0	0	0	0	0
OTU_1152	Unassigned	10	2	18	8	6	14	14	5	14	5	4	22	16	12	0	4	4	12	14	10	22	15	14	19	16	21	18	27	12	36
OTU_11521	Unassigned	0	0	0	0	0	3	0	0	0	0	0	0	0	0	0	0	0	0	1	0	0	0	0	0	0	0	0	0	2	0
OTU_11522	Unassigned	0	0	0	0	0	1	0	0	0	0	0	0	1	0	0	0	1	0	0	0	0	0	0	0	1	1	0	0	0	0
OTU_11525	d__Bacteria; p__Proteobacteria; c__Alphaproteobacteria; o__Rhodospirillales; f__Acetobacteraceae; g__unclassified; s__unclassified	0	0	0	0	0	1	0	0	0	1	0	0	0	0	0	0	0	0	0	0	0	0	0	0	1	0	0	0	0	0
OTU_11526	d__Bacteria; p__Proteobacteria; c__Betaproteobacteria; o__Burkholderiales; f__Comamonadaceae; g__unclassified; s__unclassified	0	0	0	0	0	1	0	0	0	0	1	0	1	0	0	0	0	0	0	0	0	0	0	0	0	0	0	0	0	0
OTU_11527	d__Bacteria; p__Proteobacteria; c__Alphaproteobacteria; o__Rhizobiales; f__Methylocystaceae; g__unclassified; s__unclassified	0	0	0	0	0	1	0	0	0	0	0	0	0	0	0	1	0	0	0	0	0	0	0	0	0	0	0	0	0	0
OTU_11528	d__Bacteria; p__Actinobacteria; c__unclassified; o__Pseudonocardiales; f__Pseudonocardiaceae; g__unclassified; s__unclassified	0	1	0	0	0	2	0	0	0	0	0	0	0	0	0	0	0	0	0	0	0	0	0	0	0	0	0	0	0	0
OTU_1153	d__Bacteria; p__Actinobacteria; c__unclassified; o__Streptomycetales; f__Streptomycetaceae; g__unclassified; s__unclassified	4	4	0	0	9	9	2	7	0	11	5	1	0	0	0	14	13	0	0	0	0	0	0	0	1	4	0	0	0	20
OTU_11531	Unassigned	0	0	0	0	0	2	0	1	0	0	0	0	0	0	0	0	0	0	1	0	0	0	0	0	0	0	0	0	0	0
OTU_11533	Unassigned	0	0	1	0	0	1	0	0	0	0	0	0	0	0	0	0	0	0	0	0	0	0	0	0	0	0	0	0	0	0
OTU_11536	d__Bacteria; p__Proteobacteria; c__Gammaproteobacteria; o__Xanthomonadales; f__Xanthomonadaceae; g__unclassified; s__unclassified	0	0	0	0	0	2	0	0	0	0	0	0	0	0	0	0	0	0	0	0	0	0	0	0	0	0	0	0	0	0
OTU_11537	d__Bacteria; p__Actinobacteria; c__unclassified; o__Streptomycetales; f__Streptomycetaceae; g__unclassified; s__unclassified	0	0	0	0	0	2	1	0	0	0	0	0	0	0	0	0	0	0	0	0	0	0	0	0	0	0	0	0	0	0
OTU_11538	d__Bacteria; p__unclassified; c__unclassified; o__unclassified; f__unclassified; g__unclassified; s__unclassified	0	0	0	0	0	2	0	0	0	0	0	0	0	0	0	0	0	0	0	0	0	0	0	0	0	0	0	0	0	0
OTU_1154	d__Bacteria; p__Proteobacteria; c__Gammaproteobacteria; o__Xanthomonadales; f__Xanthomonadaceae; g__unclassified; s__unclassified	0	7	0	2	2	1	0	2	0	1	1	0	0	0	0	0	1	0	0	0	0	0	0	1	0	0	0	0	0	14
OTU_11541	Unassigned	0	0	0	0	0	2	0	0	0	1	0	0	0	0	0	0	0	0	0	0	0	0	0	0	0	0	0	0	0	0
OTU_11542	d__Bacteria; p__unclassified; c__unclassified; o__unclassified; f__unclassified; g__unclassified; s__unclassified	0	0	0	0	0	1	0	0	0	0	0	0	0	0	0	0	0	0	0	0	0	0	0	0	0	0	0	0	0	0
OTU_11545	Unassigned	0	0	0	0	0	2	0	0	0	0	0	0	0	0	0	1	0	0	0	0	0	0	0	0	0	0	0	0	0	0
OTU_11546	d__Bacteria; p__Actinobacteria; c__unclassified; o__Streptomycetales; f__Streptomycetaceae; g__unclassified; s__unclassified	1	0	0	0	0	1	0	0	0	0	0	0	0	0	0	0	0	0	0	0	0	0	0	1	0	1	0	0	0	0
OTU_11547	d__Bacteria; p__Planctomycetes; c__Planctomycetia; o__Planctomycetales; f__Gemmataceae; g__unclassified; s__unclassified	0	0	0	0	0	3	0	0	0	0	0	0	0	0	0	0	0	0	0	0	0	0	0	0	0	0	0	0	0	0
OTU_11548	d__Bacteria; p__unclassified; c__unclassified; o__unclassified; f__unclassified; g__unclassified; s__unclassified	0	0	1	0	0	2	0	2	0	0	0	0	0	0	0	0	0	0	0	0	0	0	0	0	0	0	0	0	0	1
OTU_11549	Unassigned	0	0	0	0	0	0	0	0	0	1	0	0	0	0	0	0	0	0	0	0	0	0	0	0	0	0	0	0	0	0
OTU_1155	Unassigned	0	0	0	0	0	1	1	0	0	1	0	0	8	0	2	0	2	0	0	0	0	4	0	0	0	0	0	0	6	1
OTU_11550	d__Bacteria; p__Actinobacteria; c__unclassified; o__Streptomycetales; f__Streptomycetaceae; g__unclassified; s__unclassified	0	0	0	0	0	1	0	0	0	1	0	0	0	0	0	0	0	0	0	0	0	0	0	0	0	0	0	0	0	0
OTU_11553	d__Bacteria; p__Actinobacteria; c__unclassified; o__Streptomycetales; f__Streptomycetaceae; g__unclassified; s__unclassified	0	0	0	0	0	2	0	0	0	2	0	0	0	0	0	0	2	0	0	0	0	0	0	0	0	0	0	0	0	0
OTU_11556	d__Bacteria; p__unclassified; c__unclassified; o__unclassified; f__unclassified; g__unclassified; s__unclassified	0	1	0	0	0	1	0	0	0	0	0	0	0	0	0	1	0	0	0	0	0	0	0	0	0	0	0	0	0	0
OTU_11557	Unassigned	0	0	1	2	1	0	0	0	2	2	1	1	0	0	0	0	1	0	1	2	0	0	0	1	1	0	1	0	0	2
OTU_11558	Unassigned	0	0	0	0	0	1	0	0	0	0	1	1	0	0	0	0	0	0	0	0	0	0	0	0	0	0	0	0	0	0
OTU_1156	d__Bacteria; p__Actinobacteria; c__unclassified; o__Streptosporangiales; f__Nocardiopsaceae; g__unclassified; s__unclassified	3	0	1	7	0	0	0	3	0	0	0	1	0	6	0	0	0	3	0	0	2	0	2	1	1	0	0	3	0	2
OTU_11560	d__Bacteria; p__Actinobacteria; c__unclassified; o__Streptomycetales; f__Streptomycetaceae; g__unclassified; s__unclassified	0	0	0	0	0	1	0	0	0	0	0	0	0	0	0	0	0	0	0	0	0	0	0	0	0	0	0	0	0	0
OTU_11561	d__Bacteria; p__Actinobacteria; c__unclassified; o__Streptomycetales; f__Streptomycetaceae; g__unclassified; s__unclassified	0	0	0	0	0	1	0	0	0	0	0	0	2	0	0	1	0	0	0	0	0	0	0	0	0	0	0	0	0	0
OTU_11563	d__Bacteria; p__unclassified; c__unclassified; o__unclassified; f__unclassified; g__unclassified; s__unclassified	0	0	0	0	0	3	0	0	0	0	0	0	0	0	0	0	0	0	0	0	0	0	0	0	0	0	0	0	0	0
OTU_11566	d__Bacteria; p__Actinobacteria; c__unclassified; o__Streptomycetales; f__Streptomycetaceae; g__unclassified; s__unclassified	0	0	0	0	0	1	0	0	0	0	0	0	0	0	0	0	0	0	0	0	0	0	0	0	0	0	0	0	0	0
OTU_11568	d__Bacteria; p__unclassified; c__unclassified; o__unclassified; f__unclassified; g__unclassified; s__unclassified	0	0	0	0	0	2	0	0	0	0	0	0	0	0	0	0	0	0	0	0	0	0	0	0	0	0	0	0	0	0
OTU_11569	d__Bacteria; p__Proteobacteria; c__Gammaproteobacteria; o__Xanthomonadales; f__Xanthomonadaceae; g__unclassified; s__unclassified	0	0	0	0	0	2	0	0	0	0	0	0	0	0	0	0	0	0	0	0	0	0	0	0	0	0	0	0	0	0
OTU_1157	d__Bacteria; p__Actinobacteria; c__unclassified; o__Frankiales; f__Frankiaceae; g__unclassified; s__unclassified	0	0	0	0	0	0	0	0	0	17	0	0	0	0	0	0	0	0	0	0	0	0	0	0	0	0	0	0	0	0
OTU_11571	d__Bacteria; p__Actinobacteria; c__unclassified; o__Streptomycetales; f__Streptomycetaceae; g__unclassified; s__unclassified	0	0	0	0	0	0	0	0	0	0	0	0	0	0	0	0	0	0	1	0	0	0	0	0	0	0	0	0	0	0
OTU_11572	Unassigned	0	0	0	0	0	1	1	0	0	0	0	0	0	0	0	0	1	0	0	0	0	0	0	0	0	0	0	0	0	0
OTU_11574	Unassigned	0	0	0	0	0	1	0	0	0	0	0	0	0	0	0	0	0	0	0	0	0	0	0	0	0	0	0	0	0	0
OTU_11576	Unassigned	0	0	0	0	0	2	0	1	0	0	0	0	0	0	0	0	0	0	0	0	0	0	0	0	0	0	0	0	0	0
OTU_1158	Unassigned	0	6	0	2	0	2	9	1	0	4	13	0	0	0	0	6	3	1	0	0	0	0	0	1	0	1	0	5	1	4
OTU_11580	d__Bacteria; p__unclassified; c__unclassified; o__unclassified; f__unclassified; g__unclassified; s__unclassified	0	1	0	0	0	0	0	0	0	0	0	0	0	0	0	0	0	0	0	0	0	0	0	0	0	0	0	0	0	0
OTU_11584	d__Bacteria; p__Proteobacteria; c__unclassified; o__unclassified; f__unclassified; g__unclassified; s__unclassified	0	0	0	0	0	2	0	0	0	0	0	0	0	0	0	0	0	0	0	0	0	0	0	0	0	0	0	0	0	0
OTU_11587	d__Bacteria; p__Actinobacteria; c__unclassified; o__Streptomycetales; f__Streptomycetaceae; g__unclassified; s__unclassified	0	0	0	0	0	2	0	0	0	0	0	0	0	0	0	0	0	0	0	0	0	0	0	0	0	0	0	0	0	0
OTU_11591	Unassigned	0	0	0	0	0	1	0	0	0	0	0	0	0	0	0	0	0	0	0	0	0	0	0	0	0	0	0	0	0	0
OTU_11592	d__Bacteria; p__Actinobacteria; c__unclassified; o__unclassified; f__unclassified; g__unclassified; s__unclassified	0	0	0	0	0	1	0	0	0	0	0	0	0	0	0	0	0	0	0	0	0	0	0	0	0	0	0	0	0	0
OTU_11593	Unassigned	4	10	2	2	6	10	16	8	0	13	6	3	5	1	0	18	13	2	0	1	0	1	0	0	1	1	1	5	7	2
OTU_11594	d__Bacteria; p__Actinobacteria; c__unclassified; o__Streptomycetales; f__Streptomycetaceae; g__unclassified; s__unclassified	0	0	0	0	1	0	0	0	0	0	0	0	0	0	0	1	0	0	1	0	0	0	0	0	0	0	1	0	0	0
OTU_11595	Unassigned	0	0	0	0	0	1	0	0	0	0	0	0	0	0	0	0	0	0	0	0	0	0	0	1	0	0	0	0	0	0
OTU_11597	d__Bacteria; p__Planctomycetes; c__unclassified; o__unclassified; f__unclassified; g__unclassified; s__unclassified	0	0	0	0	0	1	0	0	0	0	0	0	0	0	0	0	0	0	0	0	0	0	0	0	0	0	0	0	0	0
OTU_11598	d__Bacteria; p__Actinobacteria; c__unclassified; o__Streptomycetales; f__Streptomycetaceae; g__unclassified; s__unclassified	0	0	0	0	0	2	0	0	0	0	0	0	0	0	0	0	0	0	0	0	0	0	0	0	0	0	0	0	0	0
OTU_11599	d__Bacteria; p__Actinobacteria; c__unclassified; o__unclassified; f__unclassified; g__unclassified; s__unclassified	0	0	0	0	0	2	0	0	0	0	0	0	0	0	0	0	0	0	0	0	0	0	0	0	0	0	0	0	0	0
OTU_116	Unassigned	18	156	7	16	83	68	76	93	1	71	18	9	3	0	2	55	14	0	0	15	4	1	0	3	0	19	30	4	2	120
OTU_11601	Unassigned	0	0	0	0	0	1	0	0	0	0	0	0	0	0	0	0	0	0	0	0	0	0	0	0	0	0	0	0	0	0
OTU_11602	Unassigned	0	0	0	0	0	1	0	0	0	0	0	0	0	0	0	0	0	0	0	0	0	0	0	0	1	0	0	0	0	0
OTU_11607	Unassigned	0	0	0	0	0	2	0	0	0	0	0	0	0	0	0	0	0	0	0	0	0	0	0	0	0	0	0	0	0	0
OTU_11609	Unassigned	0	0	0	0	0	2	0	0	0	0	0	1	0	0	0	1	0	0	0	0	0	0	0	0	0	0	1	0	0	0
OTU_1161	d__Bacteria; p__Proteobacteria; c__Gammaproteobacteria; o__Xanthomonadales; f__Xanthomonadaceae; g__unclassified; s__unclassified	0	1	0	0	0	0	0	0	0	2	8	0	0	0	0	2	0	0	0	0	0	0	0	0	0	0	0	0	0	1
OTU_11612	d__Bacteria; p__Actinobacteria; c__unclassified; o__Pseudonocardiales; f__Pseudonocardiaceae; g__unclassified; s__unclassified	0	0	0	0	0	2	0	0	0	0	0	0	0	0	0	0	0	0	0	0	0	0	0	0	0	0	0	0	0	0
OTU_11614	d__Bacteria; p__Actinobacteria; c__unclassified; o__Streptomycetales; f__Streptomycetaceae; g__unclassified; s__unclassified	0	0	0	0	0	2	0	0	0	0	0	0	0	0	0	0	0	0	0	0	0	0	0	0	0	0	0	0	0	0
OTU_11615	Unassigned	0	0	0	0	0	0	0	1	0	0	0	0	0	0	0	2	1	0	0	0	0	0	0	0	0	0	0	0	0	0
OTU_1162	Unassigned	0	0	5	0	0	0	1	0	1	0	0	9	2	9	0	0	0	0	3	0	10	9	4	2	15	0	1	9	0	1
OTU_11620	Unassigned	0	0	0	0	0	1	0	0	0	0	0	0	0	0	0	0	0	0	0	0	0	0	0	0	0	0	0	0	0	0
OTU_11621	d__Bacteria; p__Proteobacteria; c__Gammaproteobacteria; o__Pseudomonadales; f__Pseudomonadaceae; g__unclassified; s__unclassified	0	0	0	0	0	2	0	0	0	0	0	0	0	0	0	1	0	0	0	0	0	0	0	0	0	0	0	0	0	0
OTU_11626	d__Bacteria; p__unclassified; c__unclassified; o__unclassified; f__unclassified; g__unclassified; s__unclassified	0	0	0	0	0	2	0	0	0	0	0	0	0	0	0	0	0	0	0	0	0	0	0	0	0	0	0	0	0	0
OTU_11627	d__Bacteria; p__Planctomycetes; c__Planctomycetia; o__Planctomycetales; f__Planctomycetaceae; g__unclassified; s__unclassified	0	0	0	0	0	1	0	0	0	0	0	0	0	0	0	0	0	0	0	0	0	0	0	0	0	0	0	0	0	0
OTU_11628	d__Bacteria; p__Actinobacteria; c__unclassified; o__Streptomycetales; f__Streptomycetaceae; g__unclassified; s__unclassified	0	0	0	0	0	1	0	0	0	0	0	0	0	0	0	0	0	0	0	0	0	0	0	0	0	0	0	0	0	0
OTU_1163	d__Bacteria; p__Proteobacteria; c__Alphaproteobacteria; o__Rhodospirillales; f__Acetobacteraceae; g__unclassified; s__unclassified	2	5	0	0	15	3	3	8	0	7	6	0	0	0	0	11	4	0	0	0	0	0	0	0	0	0	1	0	11	3
OTU_11631	Unassigned	0	0	0	1	0	2	0	0	0	0	2	0	0	0	0	1	0	0	0	0	0	0	0	0	0	0	0	0	0	0
OTU_11632	d__Bacteria; p__Actinobacteria; c__unclassified; o__Streptomycetales; f__Streptomycetaceae; g__unclassified; s__unclassified	0	0	0	1	0	1	0	0	0	0	0	0	0	0	0	0	0	0	0	0	0	0	0	0	0	0	0	0	0	0
OTU_11633	d__Bacteria; p__Planctomycetes; c__Planctomycetia; o__Planctomycetales; f__Isosphaeraceae; g__unclassified; s__unclassified	0	0	0	0	0	2	0	0	0	0	0	0	0	0	0	0	0	0	0	0	0	0	0	0	0	0	0	0	0	0
OTU_11635	d__Bacteria; p__Proteobacteria; c__Alphaproteobacteria; o__Rhizobiales; f__Methylocystaceae; g__unclassified; s__unclassified	0	0	0	0	0	1	0	0	0	0	0	0	1	0	0	0	0	0	0	0	0	0	0	2	0	0	0	0	0	0
OTU_11637	d__Bacteria; p__Actinobacteria; c__unclassified; o__Pseudonocardiales; f__Pseudonocardiaceae; g__unclassified; s__unclassified	0	0	0	0	0	1	0	0	0	0	0	0	0	0	0	0	0	0	0	0	0	0	0	0	0	0	0	0	0	0
OTU_1164	d__Bacteria; p__Actinobacteria; c__unclassified; o__Streptomycetales; f__Streptomycetaceae; g__unclassified; s__unclassified	4	6	5	1	6	5	0	7	0	4	5	6	2	0	0	5	10	0	0	3	0	0	0	2	1	0	3	5	9	4
OTU_11643	d__Bacteria; p__Actinobacteria; c__unclassified; o__Streptomycetales; f__Streptomycetaceae; g__unclassified; s__unclassified	0	0	0	0	0	0	0	0	0	0	0	0	0	0	0	0	0	0	0	0	0	0	0	0	1	0	0	0	0	0
OTU_11644	d__Bacteria; p__Actinobacteria; c__unclassified; o__Streptomycetales; f__Streptomycetaceae; g__unclassified; s__unclassified	0	0	0	0	0	0	0	0	0	0	0	0	0	0	0	0	0	0	0	0	0	0	0	0	0	0	0	0	0	0
OTU_11645	d__Bacteria; p__Planctomycetes; c__Planctomycetia; o__Planctomycetales; f__unclassified; g__unclassified; s__unclassified	0	0	0	0	0	0	0	0	0	0	0	0	0	0	0	0	0	0	0	0	0	0	0	0	1	0	0	0	0	0
OTU_11646	d__Bacteria; p__Proteobacteria; c__Alphaproteobacteria; o__Rhizobiales; f__Methylocystaceae; g__unclassified; s__unclassified	0	0	0	0	0	0	0	0	0	0	0	0	0	0	0	0	0	0	0	0	0	0	0	0	0	0	0	0	0	0
OTU_11647	Unassigned	0	0	0	0	0	0	0	0	0	0	0	0	0	0	0	0	0	0	0	0	0	0	0	0	0	0	0	0	0	0
OTU_1165	d__Bacteria; p__unclassified; c__unclassified; o__unclassified; f__unclassified; g__unclassified; s__unclassified	0	0	0	0	0	1	0	0	0	0	0	0	0	0	0	0	0	9	0	0	0	0	0	0	1	0	0	0	0	0
OTU_11650	d__Bacteria; p__Proteobacteria; c__Alphaproteobacteria; o__Rhizobiales; f__Bradyrhizobiaceae; g__unclassified; s__unclassified	0	0	0	0	0	0	0	0	0	0	0	0	0	0	0	0	0	0	0	0	0	0	0	0	0	0	0	0	0	0
OTU_11653	d__Bacteria; p__Actinobacteria; c__unclassified; o__Streptomycetales; f__Streptomycetaceae; g__unclassified; s__unclassified	0	0	0	0	0	0	0	0	0	0	0	0	0	0	0	0	0	0	0	0	0	0	0	0	0	0	0	0	0	0
OTU_11654	Unassigned	0	0	0	0	0	0	0	0	0	0	0	0	0	0	0	0	0	0	0	0	0	0	0	0	0	0	0	0	0	0
OTU_11656	d__Bacteria; p__Planctomycetes; c__Planctomycetia; o__Planctomycetales; f__unclassified; g__unclassified; s__unclassified	0	0	0	0	0	0	0	0	0	0	0	0	0	0	0	0	0	0	0	0	0	0	0	0	0	0	0	0	0	0
OTU_11657	d__Bacteria; p__Proteobacteria; c__unclassified; o__unclassified; f__unclassified; g__unclassified; s__unclassified	0	0	0	0	0	0	1	0	0	0	0	0	0	0	0	0	0	0	0	0	0	0	0	0	0	0	0	0	0	0
OTU_11659	d__Bacteria; p__Proteobacteria; c__Alphaproteobacteria; o__Rhizobiales; f__Bradyrhizobiaceae; g__unclassified; s__unclassified	0	0	0	0	0	0	0	0	0	0	0	0	0	0	0	0	0	0	0	0	0	0	0	0	0	0	0	0	0	0
OTU_1166	Unassigned	0	0	1	0	0	0	0	0	3	0	5	0	0	1	3	0	0	8	3	3	0	3	0	1	0	0	0	2	0	2
OTU_11662	Unassigned	0	0	0	0	0	0	0	0	0	0	0	0	0	0	0	0	0	0	0	0	0	0	0	0	0	0	0	0	0	0
OTU_11663	d__Bacteria; p__Actinobacteria; c__unclassified; o__Streptomycetales; f__Streptomycetaceae; g__unclassified; s__unclassified	0	0	0	0	0	0	0	0	0	0	0	0	0	0	0	0	0	1	0	0	0	0	0	0	0	0	0	0	0	0
OTU_11667	d__Bacteria; p__Actinobacteria; c__unclassified; o__unclassified; f__unclassified; g__unclassified; s__unclassified	0	0	0	0	0	0	0	0	0	0	0	0	0	0	0	0	0	0	0	0	0	0	0	0	0	0	1	0	1	0
OTU_11669	d__Bacteria; p__Planctomycetes; c__Planctomycetia; o__Planctomycetales; f__unclassified; g__unclassified; s__unclassified	0	0	0	0	0	0	0	0	0	0	0	0	1	0	0	0	0	0	0	0	0	0	0	0	0	0	0	0	0	0
OTU_1167	d__Bacteria; p__Planctomycetes; c__Planctomycetia; o__Planctomycetales; f__unclassified; g__unclassified; s__unclassified	0	0	0	0	0	0	6	0	0	0	0	5	0	0	0	0	0	11	0	0	0	0	0	0	0	0	0	0	2	0
OTU_11670	Unassigned	0	0	0	0	0	0	0	0	0	0	0	1	0	0	0	0	0	0	0	0	0	0	0	0	0	0	0	0	0	0
OTU_11671	d__Bacteria; p__Proteobacteria; c__Gammaproteobacteria; o__Xanthomonadales; f__Xanthomonadaceae; g__unclassified; s__unclassified	0	0	0	0	0	0	0	0	0	0	0	0	0	1	2	0	0	0	1	0	0	0	0	0	0	0	0	0	0	1
OTU_11672	Unassigned	0	0	0	0	0	0	0	0	0	0	0	0	0	0	0	0	0	0	1	0	0	0	0	0	0	0	0	0	0	0
OTU_11673	d__Bacteria; p__Planctomycetes; c__Planctomycetia; o__Planctomycetales; f__Isosphaeraceae; g__unclassified; s__unclassified	0	0	0	0	0	0	0	0	0	0	0	0	0	0	0	2	0	2	0	0	0	0	0	0	0	0	0	0	0	0
OTU_11674	d__Bacteria; p__Actinobacteria; c__unclassified; o__unclassified; f__unclassified; g__unclassified; s__unclassified	0	0	0	0	0	0	0	0	0	0	0	0	0	0	0	0	0	0	0	0	0	0	0	0	0	0	1	0	0	0
OTU_11676	d__Bacteria; p__Proteobacteria; c__Gammaproteobacteria; o__Pseudomonadales; f__Pseudomonadaceae; g__unclassified; s__unclassified	0	0	0	0	0	0	0	0	0	0	0	0	0	0	0	0	0	0	0	0	0	0	0	0	0	0	0	0	0	0
OTU_11678	Unassigned	0	0	0	0	0	0	0	0	0	0	0	0	0	0	0	0	0	0	0	0	0	0	0	0	0	0	0	0	0	0
OTU_11679	Unassigned	0	0	0	0	0	0	0	0	0	0	0	0	0	0	0	0	0	0	0	0	0	0	0	0	0	0	0	0	0	0
OTU_1168	Unassigned	0	0	0	3	1	0	0	1	2	1	0	6	0	4	4	0	0	12	14	1	5	4	3	3	5	1	1	8	0	5
OTU_11680	Unassigned	0	0	0	0	0	0	0	0	0	0	0	0	0	0	0	0	0	0	0	0	0	0	0	0	0	0	0	0	0	0
OTU_11681	d__Bacteria; p__Proteobacteria; c__Gammaproteobacteria; o__Xanthomonadales; f__Xanthomonadaceae; g__unclassified; s__unclassified	0	0	0	0	0	0	0	0	0	0	0	0	0	0	0	0	0	0	0	0	0	0	0	0	0	0	0	0	0	0
OTU_11682	d__Bacteria; p__Proteobacteria; c__Gammaproteobacteria; o__Pseudomonadales; f__Pseudomonadaceae; g__unclassified; s__unclassified	0	0	0	0	0	0	0	0	0	0	0	0	0	0	0	0	0	0	0	0	0	0	0	0	0	0	0	0	0	0
OTU_11683	d__Bacteria; p__Proteobacteria; c__Alphaproteobacteria; o__Rhizobiales; f__Bradyrhizobiaceae; g__unclassified; s__unclassified	0	0	0	0	0	0	0	0	0	0	0	0	0	0	0	0	0	0	1	0	0	0	0	0	0	0	0	0	0	1
OTU_11684	d__Bacteria; p__Actinobacteria; c__unclassified; o__Streptomycetales; f__Streptomycetaceae; g__unclassified; s__unclassified	0	0	0	0	0	0	0	0	0	0	0	0	0	0	0	0	0	0	0	0	0	0	0	0	0	0	0	0	0	0
OTU_11685	d__Bacteria; p__unclassified; c__unclassified; o__unclassified; f__unclassified; g__unclassified; s__unclassified	0	0	0	0	0	0	0	0	0	0	0	0	0	0	0	0	0	0	0	0	0	0	0	0	0	0	0	0	0	0
OTU_11687	d__Bacteria; p__Proteobacteria; c__Gammaproteobacteria; o__Pseudomonadales; f__Pseudomonadaceae; g__unclassified; s__unclassified	0	0	0	0	0	0	0	0	0	0	0	0	0	0	0	0	0	0	0	0	0	0	0	0	0	0	0	0	0	0
OTU_11688	Unassigned	0	0	0	0	0	0	0	0	0	0	0	0	0	0	0	0	0	0	0	0	0	0	0	0	0	0	0	0	0	0
OTU_1169	Unassigned	0	0	1	0	0	0	0	0	0	1	0	0	0	0	0	0	0	1	0	0	0	0	0	0	3	0	0	0	0	0
OTU_11690	d__Bacteria; p__Actinobacteria; c__unclassified; o__Streptomycetales; f__Streptomycetaceae; g__unclassified; s__unclassified	0	0	0	0	0	0	0	0	0	0	0	0	1	1	0	0	0	0	0	0	0	0	0	0	0	0	0	0	1	0
OTU_11691	d__Bacteria; p__unclassified; c__unclassified; o__unclassified; f__unclassified; g__unclassified; s__unclassified	0	0	0	0	0	0	0	0	0	0	0	0	0	0	0	0	0	0	0	0	0	0	0	0	0	0	0	0	0	0
OTU_11694	d__Bacteria; p__Actinobacteria; c__unclassified; o__Corynebacteriales; f__Nocardiaceae; g__unclassified; s__unclassified	0	0	0	0	0	0	0	0	0	0	0	0	0	0	0	0	0	0	0	0	0	0	0	0	0	0	0	0	0	0
OTU_11695	d__Bacteria; p__unclassified; c__unclassified; o__unclassified; f__unclassified; g__unclassified; s__unclassified	0	0	0	0	0	0	0	0	0	0	0	0	0	0	0	0	0	0	0	0	0	0	0	0	0	0	0	0	0	0
OTU_11699	d__Bacteria; p__Proteobacteria; c__Alphaproteobacteria; o__Rhodospirillales; f__Acetobacteraceae; g__unclassified; s__unclassified	0	0	0	0	0	0	0	0	0	0	0	0	0	0	0	0	0	2	0	0	0	0	0	0	0	0	0	0	0	0
OTU_117	Unassigned	27	18	100	140	34	36	55	13	39	42	24	9	223	18	6	45	18	0	26	82	95	3	56	3	52	30	33	54	85	44
OTU_1170	d__Bacteria; p__Planctomycetes; c__Planctomycetia; o__Planctomycetales; f__Isosphaeraceae; g__unclassified; s__unclassified	0	0	3	0	5	3	0	3	0	1	0	8	0	0	0	0	0	0	0	0	0	0	0	0	0	0	0	0	0	0
OTU_1171	d__Bacteria; p__Proteobacteria; c__Gammaproteobacteria; o__Xanthomonadales; f__Xanthomonadaceae; g__unclassified; s__unclassified	3	7	0	1	11	2	8	5	0	4	0	0	1	0	0	7	4	0	0	0	0	0	0	0	0	0	1	1	1	10
OTU_11710	d__Bacteria; p__Proteobacteria; c__Betaproteobacteria; o__Burkholderiales; f__Comamonadaceae; g__unclassified; s__unclassified	0	0	0	0	0	0	0	0	0	0	0	0	0	0	0	0	0	0	0	0	0	0	0	0	0	0	0	0	0	0
OTU_11711	Unassigned	0	0	0	0	0	0	0	0	0	0	0	0	0	0	0	0	0	0	0	0	0	0	0	0	0	0	0	0	0	0
OTU_11713	d__Bacteria; p__Planctomycetes; c__unclassified; o__unclassified; f__unclassified; g__unclassified; s__unclassified	0	0	0	0	0	0	0	0	0	0	0	0	0	0	0	0	0	0	0	0	0	0	0	0	0	0	0	0	0	0
OTU_11714	d__Bacteria; p__Planctomycetes; c__Planctomycetia; o__Planctomycetales; f__unclassified; g__unclassified; s__unclassified	0	0	0	0	0	0	0	0	0	0	0	1	0	0	0	0	0	0	0	0	0	0	0	0	0	0	0	0	0	0
OTU_11718	d__Bacteria; p__Proteobacteria; c__Alphaproteobacteria; o__Caulobacterales; f__Caulobacteraceae; g__unclassified; s__unclassified	0	1	0	0	0	0	0	0	0	0	0	0	0	0	0	0	2	0	0	0	0	0	0	0	0	0	0	0	0	0
OTU_1172	Unassigned	0	0	0	0	0	0	0	0	0	0	0	0	0	0	0	0	0	0	0	0	0	15	0	0	0	0	0	0	0	0
OTU_11723	d__Bacteria; p__Planctomycetes; c__Planctomycetia; o__Planctomycetales; f__Isosphaeraceae; g__unclassified; s__unclassified	0	0	0	0	0	0	0	0	0	0	0	0	0	0	0	0	0	0	0	0	0	0	0	0	0	0	0	0	0	0
OTU_11724	Unassigned	0	0	0	0	0	0	0	0	2	0	0	0	1	0	0	0	0	0	0	0	0	3	0	1	2	0	1	1	0	0
OTU_11727	d__Bacteria; p__Planctomycetes; c__Planctomycetia; o__Planctomycetales; f__unclassified; g__unclassified; s__unclassified	0	0	1	0	0	0	0	0	0	0	0	0	0	0	0	0	0	0	0	0	0	0	0	0	0	0	0	0	0	0
OTU_11728	d__Bacteria; p__Planctomycetes; c__Planctomycetia; o__Planctomycetales; f__Isosphaeraceae; g__unclassified; s__unclassified	0	0	0	0	0	0	0	1	0	1	0	0	0	0	0	0	0	0	0	0	0	0	0	0	0	0	0	0	0	0
OTU_11729	d__Bacteria; p__Actinobacteria; c__unclassified; o__Streptomycetales; f__Streptomycetaceae; g__unclassified; s__unclassified	0	0	0	0	0	0	1	0	0	0	0	0	0	0	0	0	0	0	0	0	0	0	0	1	0	0	0	0	0	0
OTU_1173	Unassigned	0	2	21	6	2	13	10	2	20	11	10	14	11	2	2	6	9	2	6	7	0	9	14	8	7	6	8	11	12	8
OTU_11730	d__Bacteria; p__unclassified; c__unclassified; o__unclassified; f__unclassified; g__unclassified; s__unclassified	0	0	0	0	0	0	0	0	0	0	0	0	0	0	0	0	0	0	0	0	0	0	0	0	0	0	0	0	0	0
OTU_11732	d__Bacteria; p__Proteobacteria; c__Gammaproteobacteria; o__Pseudomonadales; f__Pseudomonadaceae; g__unclassified; s__unclassified	0	0	0	0	0	0	0	0	1	0	0	0	0	0	0	0	0	0	0	0	0	0	0	0	0	0	0	0	0	0
OTU_11735	d__Bacteria; p__Actinobacteria; c__unclassified; o__Streptomycetales; f__Streptomycetaceae; g__unclassified; s__unclassified	0	0	0	0	0	0	0	0	0	0	0	0	0	0	0	0	0	0	0	0	0	0	0	0	0	0	0	0	0	0
OTU_11738	Unassigned	0	0	0	0	0	0	0	0	0	0	0	0	0	0	0	0	0	0	0	0	0	0	0	0	0	0	1	0	0	0
OTU_11739	Unassigned	0	0	0	0	0	0	0	0	0	0	0	0	0	0	0	0	0	0	0	0	0	0	0	0	0	0	0	0	0	0
OTU_1174	Unassigned	1	8	3	4	0	1	4	4	6	0	3	1	1	5	8	6	8	5	3	8	3	12	30	0	8	6	4	4	7	4
OTU_11740	d__Bacteria; p__unclassified; c__unclassified; o__unclassified; f__unclassified; g__unclassified; s__unclassified	0	0	0	0	0	0	0	0	0	0	0	0	0	0	0	0	0	0	0	0	0	0	0	0	0	0	0	0	0	0
OTU_11741	Unassigned	0	0	0	0	0	0	0	0	0	0	0	0	0	0	0	0	0	0	0	0	0	0	0	0	0	0	0	0	0	0
OTU_11743	Unassigned	0	0	0	0	0	0	0	0	0	0	0	0	0	0	0	0	0	0	0	0	0	0	0	0	0	0	0	0	0	0
OTU_11744	d__Bacteria; p__Proteobacteria; c__Alphaproteobacteria; o__Rhodospirillales; f__Acetobacteraceae; g__unclassified; s__unclassified	0	0	0	0	0	0	0	0	0	0	0	0	0	1	0	0	0	1	0	0	0	0	0	0	0	0	0	0	0	0
OTU_11745	d__Bacteria; p__unclassified; c__unclassified; o__unclassified; f__unclassified; g__unclassified; s__unclassified	0	0	0	0	0	0	0	0	0	0	0	0	2	0	0	1	0	0	0	0	0	0	0	0	0	1	0	0	0	0
OTU_11746	Unassigned	0	0	0	0	0	0	0	0	0	0	0	0	0	0	0	0	0	0	2	0	0	1	0	0	0	0	0	1	0	0
OTU_11747	Unassigned	0	2	0	0	1	0	1	0	0	0	0	0	0	0	0	0	2	0	0	0	0	0	0	0	0	0	0	0	0	0
OTU_11748	Unassigned	0	0	0	0	0	1	0	0	0	0	0	0	0	0	0	0	0	0	0	0	0	0	0	0	0	0	0	0	0	0
OTU_1175	d__Bacteria; p__Actinobacteria; c__unclassified; o__Streptomycetales; f__Streptomycetaceae; g__unclassified; s__unclassified	7	1	3	0	0	2	1	3	8	0	0	0	1	0	9	6	2	1	4	4	4	10	0	10	5	5	2	4	2	0
OTU_11750	d__Bacteria; p__Proteobacteria; c__Betaproteobacteria; o__Burkholderiales; f__Comamonadaceae; g__unclassified; s__unclassified	0	0	0	0	0	1	0	0	0	0	0	0	0	0	0	0	0	0	0	0	0	0	0	0	0	0	0	0	0	0
OTU_11751	d__Bacteria; p__Proteobacteria; c__Alphaproteobacteria; o__unclassified; f__unclassified; g__unclassified; s__unclassified	0	0	0	0	0	0	0	0	0	0	0	0	0	0	0	0	0	0	0	0	0	0	0	0	0	0	0	0	0	0
OTU_11752	d__Bacteria; p__Planctomycetes; c__Planctomycetia; o__Planctomycetales; f__unclassified; g__unclassified; s__unclassified	0	0	0	0	0	0	0	0	0	0	0	1	0	0	0	0	0	0	0	0	0	0	0	0	0	0	0	0	0	0
OTU_11753	d__Bacteria; p__Actinobacteria; c__Rubrobacteria; o__Rubrobacterales; f__Rubrobacteraceae; g__unclassified; s__unclassified	0	0	0	0	0	0	0	0	0	0	0	0	0	0	0	0	0	0	0	0	0	0	0	0	1	0	0	0	0	0
OTU_11755	d__Bacteria; p__Planctomycetes; c__Planctomycetia; o__Planctomycetales; f__unclassified; g__unclassified; s__unclassified	0	0	0	0	0	0	0	0	0	0	0	0	0	0	0	0	0	0	0	0	0	0	0	0	0	0	0	0	0	0
OTU_11757	d__Bacteria; p__Proteobacteria; c__Alphaproteobacteria; o__Rhizobiales; f__Bradyrhizobiaceae; g__Variibacter; s__unclassified	0	0	0	0	0	0	0	0	0	0	0	0	0	0	0	0	0	0	0	0	0	0	0	0	0	0	0	0	0	0
OTU_1176	d__Bacteria; p__Actinobacteria; c__unclassified; o__Streptomycetales; f__Streptomycetaceae; g__unclassified; s__unclassified	0	0	0	0	0	0	0	0	0	0	0	0	0	0	0	0	0	0	0	0	0	0	0	14	0	0	0	0	0	0
OTU_11760	d__Bacteria; p__unclassified; c__unclassified; o__unclassified; f__unclassified; g__unclassified; s__unclassified	0	0	0	0	0	0	0	0	0	0	0	0	0	0	0	0	0	0	0	0	0	0	0	0	0	0	0	0	2	0
OTU_11761	d__Bacteria; p__Actinobacteria; c__unclassified; o__Streptomycetales; f__Streptomycetaceae; g__unclassified; s__unclassified	0	0	0	0	0	0	0	0	0	0	0	0	0	0	0	0	0	0	0	0	0	1	0	0	0	0	0	0	0	0
OTU_11762	d__Bacteria; p__Proteobacteria; c__Alphaproteobacteria; o__Rhodospirillales; f__Acetobacteraceae; g__unclassified; s__unclassified	0	0	0	0	0	0	0	0	0	0	0	0	0	0	0	0	0	0	0	0	0	0	0	0	0	0	0	0	0	0
OTU_11764	d__Bacteria; p__Actinobacteria; c__unclassified; o__unclassified; f__unclassified; g__unclassified; s__unclassified	0	0	0	0	0	0	0	0	0	0	0	0	2	0	0	0	0	0	0	0	0	0	0	0	0	0	0	0	0	0
OTU_11767	Unassigned	0	0	2	0	1	0	0	0	0	1	0	1	0	0	0	0	1	2	0	0	0	0	2	2	0	2	0	0	0	0
OTU_11769	Unassigned	0	0	0	0	2	0	0	0	1	1	1	0	1	0	0	1	0	0	2	0	1	0	0	1	0	1	0	0	0	0
OTU_1177	Unassigned	3	5	10	8	1	1	2	3	2	2	5	7	3	1	1	1	0	2	2	1	1	2	6	5	12	3	11	3	4	6
OTU_11770	d__Bacteria; p__Proteobacteria; c__Alphaproteobacteria; o__Rhizobiales; f__Bradyrhizobiaceae; g__Bradyrhizobium; s__unclassified	0	0	0	0	0	0	0	0	0	0	0	0	0	0	2	0	0	0	0	0	0	0	0	0	0	0	0	0	0	0
OTU_11771	d__Bacteria; p__Actinobacteria; c__unclassified; o__Micromonosporales; f__Micromonosporaceae; g__unclassified; s__unclassified	0	0	2	0	0	1	0	0	0	1	0	1	0	0	1	0	0	0	0	2	0	1	0	0	0	1	0	0	0	0
OTU_11772	d__Bacteria; p__Actinobacteria; c__unclassified; o__Pseudonocardiales; f__Pseudonocardiaceae; g__unclassified; s__unclassified	0	0	0	0	0	1	0	0	0	0	0	1	0	0	0	0	0	0	0	0	0	0	0	0	0	0	0	0	0	0
OTU_11773	d__Bacteria; p__Actinobacteria; c__unclassified; o__Streptomycetales; f__Streptomycetaceae; g__unclassified; s__unclassified	0	0	0	0	0	0	0	0	0	0	0	0	0	0	0	0	0	0	0	0	0	0	0	0	0	0	0	0	0	0
OTU_11775	d__Bacteria; p__Proteobacteria; c__Gammaproteobacteria; o__Pseudomonadales; f__Pseudomonadaceae; g__unclassified; s__unclassified	0	0	0	0	0	0	0	0	0	1	0	0	1	0	0	0	0	0	0	0	0	0	0	0	0	0	0	0	0	0
OTU_11776	d__Bacteria; p__Proteobacteria; c__Alphaproteobacteria; o__Rhodospirillales; f__Acetobacteraceae; g__unclassified; s__unclassified	0	0	0	0	0	0	0	0	0	0	0	0	0	0	0	0	0	0	0	0	0	0	0	0	0	0	0	0	0	0
OTU_11778	d__Bacteria; p__Proteobacteria; c__Alphaproteobacteria; o__Rhodospirillales; f__Acetobacteraceae; g__unclassified; s__unclassified	0	0	0	0	0	0	0	0	0	0	0	0	0	0	0	0	0	0	0	0	0	0	0	0	0	0	0	0	0	0
OTU_11779	d__Bacteria; p__unclassified; c__unclassified; o__unclassified; f__unclassified; g__unclassified; s__unclassified	0	0	0	0	0	0	0	0	0	0	0	0	2	0	0	1	0	0	0	0	0	0	0	0	2	2	0	0	0	0
OTU_1178	d__Bacteria; p__Actinobacteria; c__unclassified; o__Streptomycetales; f__Streptomycetaceae; g__unclassified; s__unclassified	0	0	1	0	0	0	0	0	0	1	0	0	0	4	0	0	1	4	0	0	2	0	0	0	9	1	2	7	1	0
OTU_11785	Unassigned	0	0	0	0	0	0	0	0	0	0	0	0	0	0	0	0	0	0	0	0	0	0	0	0	0	0	0	0	0	0
OTU_11786	d__Bacteria; p__Actinobacteria; c__Rubrobacteria; o__Rubrobacterales; f__Rubrobacteraceae; g__unclassified; s__unclassified	0	0	0	0	0	0	0	0	0	0	0	0	0	0	0	0	0	0	0	0	0	0	0	0	0	0	0	0	0	0
OTU_11787	d__Bacteria; p__Proteobacteria; c__Betaproteobacteria; o__Burkholderiales; f__Comamonadaceae; g__unclassified; s__unclassified	0	0	0	0	0	0	0	0	0	0	0	0	0	2	0	0	0	0	0	0	0	0	0	0	0	0	0	0	0	0
OTU_11788	Unassigned	0	0	0	0	0	0	0	0	0	0	0	0	0	0	0	0	0	0	0	0	0	0	0	0	0	0	0	0	0	0
OTU_1179	d__Bacteria; p__Proteobacteria; c__Gammaproteobacteria; o__Xanthomonadales; f__Xanthomonadaceae; g__unclassified; s__unclassified	0	0	2	0	0	0	0	0	1	0	0	5	0	0	9	0	0	1	0	8	2	0	4	3	9	0	7	2	0	0
OTU_11792	Unassigned	0	0	0	0	0	0	0	0	0	0	0	1	0	0	0	0	0	0	0	0	0	0	0	0	0	0	0	0	0	0
OTU_11794	d__Bacteria; p__Actinobacteria; c__unclassified; o__Pseudonocardiales; f__Pseudonocardiaceae; g__unclassified; s__unclassified	0	0	0	0	0	0	0	0	0	0	0	0	0	0	0	0	0	0	0	0	0	0	0	0	0	0	0	0	0	0
OTU_11798	Unassigned	0	0	0	0	0	0	0	0	2	0	0	1	0	0	0	0	0	0	0	0	0	2	0	0	1	0	0	0	0	1
OTU_118	Unassigned	252	155	124	206	90	109	140	89	186	80	112	56	87	9	5	96	115	0	22	75	36	15	71	43	57	126	129	56	46	23
OTU_1180	d__Bacteria; p__Actinobacteria; c__unclassified; o__Streptomycetales; f__Streptomycetaceae; g__unclassified; s__unclassified	5	2	3	2	1	2	11	3	3	5	4	2	21	0	7	2	7	2	0	0	1	2	5	3	0	18	2	2	2	3
OTU_11800	Unassigned	0	0	0	0	0	0	0	0	0	0	0	0	0	0	0	0	0	0	0	0	0	0	0	0	0	0	0	2	0	0
OTU_11804	d__Bacteria; p__Actinobacteria; c__unclassified; o__Micromonosporales; f__Micromonosporaceae; g__Actinoplanes; s__unclassified	0	1	0	0	0	0	0	0	0	0	0	0	0	0	0	0	0	0	0	0	0	0	0	0	0	0	0	0	0	0
OTU_11807	Unassigned	0	0	0	0	0	0	0	0	0	0	0	0	0	0	0	0	0	0	0	0	0	0	0	0	0	0	0	2	0	0
OTU_11813	Unassigned	0	0	0	0	0	0	0	0	0	0	0	1	0	0	0	1	1	0	0	0	0	0	0	0	0	0	0	0	0	0
OTU_11816	d__Bacteria; p__Actinobacteria; c__unclassified; o__Streptomycetales; f__Streptomycetaceae; g__unclassified; s__unclassified	0	0	0	0	0	1	0	2	0	0	0	0	0	0	0	0	0	0	0	0	0	0	0	0	0	0	0	1	0	0
OTU_11818	d__Bacteria; p__Actinobacteria; c__unclassified; o__Streptomycetales; f__Streptomycetaceae; g__Streptomyces; s__unclassified	0	0	0	0	0	0	0	0	0	0	0	0	0	0	0	0	1	0	0	0	0	0	0	0	0	0	0	1	0	0
OTU_11819	Unassigned	0	0	0	0	0	0	0	0	0	0	0	0	0	0	0	0	0	0	0	0	0	0	0	0	0	0	0	2	0	0
OTU_1182	d__Bacteria; p__unclassified; c__unclassified; o__unclassified; f__unclassified; g__unclassified; s__unclassified	10	17	3	6	14	4	4	6	17	9	15	8	15	2	1	8	10	0	1	14	8	4	13	9	9	26	12	5	21	4
OTU_11821	d__Bacteria; p__Planctomycetes; c__Planctomycetia; o__Planctomycetales; f__unclassified; g__unclassified; s__unclassified	0	0	0	0	0	0	0	0	0	0	0	0	0	0	0	0	0	0	0	0	0	0	0	0	0	0	0	2	0	0
OTU_11822	Unassigned	0	0	0	0	0	0	0	0	0	0	0	0	0	0	0	0	0	0	0	0	0	0	0	0	0	0	0	2	0	0
OTU_11825	d__Bacteria; p__Proteobacteria; c__Alphaproteobacteria; o__Caulobacterales; f__Caulobacteraceae; g__unclassified; s__unclassified	0	0	0	0	0	0	0	0	0	0	0	0	0	0	0	0	0	0	0	0	0	0	0	0	0	0	0	1	0	0
OTU_11828	d__Bacteria; p__Planctomycetes; c__Planctomycetia; o__Planctomycetales; f__unclassified; g__unclassified; s__unclassified	0	0	0	0	0	0	0	0	0	0	0	0	0	0	0	0	0	0	0	0	0	0	0	1	0	0	0	1	0	0
OTU_1183	d__Bacteria; p__Actinobacteria; c__unclassified; o__Streptomycetales; f__Streptomycetaceae; g__unclassified; s__unclassified	0	1	1	4	2	2	0	0	5	2	4	0	3	0	0	1	1	0	0	4	0	0	0	0	0	1	10	0	2	2
OTU_11834	Unassigned	0	0	0	2	0	0	0	1	0	0	0	2	1	0	0	0	1	0	0	0	0	2	1	0	1	0	0	2	0	0
OTU_11835	d__Bacteria; p__Planctomycetes; c__unclassified; o__unclassified; f__unclassified; g__unclassified; s__unclassified	0	0	0	0	0	0	0	0	0	0	0	0	0	0	0	0	0	0	0	0	0	0	0	0	0	0	0	2	0	0
OTU_11839	Unassigned	0	0	0	0	0	0	0	0	0	0	0	0	0	0	0	0	0	0	0	0	0	0	0	0	0	0	0	0	0	0
OTU_1184	d__Bacteria; p__Actinobacteria; c__unclassified; o__unclassified; f__unclassified; g__unclassified; s__unclassified	0	0	0	1	0	0	0	2	0	0	0	0	0	0	7	10	0	0	0	0	0	0	0	0	0	0	15	2	0	0
OTU_11842	d__Bacteria; p__Proteobacteria; c__Alphaproteobacteria; o__Rhizobiales; f__Bradyrhizobiaceae; g__unclassified; s__unclassified	0	0	0	0	0	0	0	0	1	0	0	0	1	0	0	0	0	0	0	0	0	0	0	0	0	0	0	0	0	0
OTU_11843	Unassigned	0	0	0	0	0	0	0	0	0	0	0	0	0	0	0	0	0	0	0	0	0	0	0	0	0	0	0	2	0	0
OTU_11847	Unassigned	0	0	0	0	0	0	0	0	0	0	0	0	1	0	0	0	0	0	0	0	0	0	0	0	1	0	0	0	0	0
OTU_11849	d__Bacteria; p__Proteobacteria; c__unclassified; o__unclassified; f__unclassified; g__unclassified; s__unclassified	0	0	0	0	0	0	0	0	0	0	0	0	0	0	0	0	0	0	0	0	0	0	0	0	0	0	0	2	0	0
OTU_1185	d__Bacteria; p__Proteobacteria; c__Alphaproteobacteria; o__Caulobacterales; f__Caulobacteraceae; g__unclassified; s__unclassified	0	1	0	0	2	0	13	1	0	10	0	3	0	0	0	6	0	0	1	0	0	0	0	0	0	0	3	0	0	0
OTU_11853	d__Bacteria; p__Planctomycetes; c__Planctomycetia; o__Planctomycetales; f__unclassified; g__unclassified; s__unclassified	0	0	0	0	0	0	0	0	0	0	0	0	0	0	0	0	0	0	0	0	0	0	0	0	0	0	0	1	0	0
OTU_11859	Unassigned	0	0	0	0	2	0	0	0	2	0	0	0	0	0	0	0	0	0	0	0	0	0	0	0	0	0	0	1	0	0
OTU_1186	d__Bacteria; p__Planctomycetes; c__Planctomycetia; o__Planctomycetales; f__unclassified; g__unclassified; s__unclassified	8	1	2	1	3	5	2	6	15	3	7	4	2	12	4	0	5	0	2	5	10	12	13	5	1	2	3	0	3	3
OTU_11860	d__Bacteria; p__Actinobacteria; c__unclassified; o__Streptomycetales; f__Streptomycetaceae; g__unclassified; s__unclassified	0	0	0	0	0	0	0	0	0	0	0	0	0	0	0	0	0	0	0	0	0	0	0	0	0	0	0	2	0	0
OTU_11862	d__Bacteria; p__Actinobacteria; c__unclassified; o__Pseudonocardiales; f__Pseudonocardiaceae; g__unclassified; s__unclassified	0	0	0	0	0	0	2	0	0	0	2	0	0	0	0	1	0	0	0	0	0	0	0	0	0	0	0	2	0	0
OTU_1187	d__Bacteria; p__Planctomycetes; c__Planctomycetia; o__Planctomycetales; f__Planctomycetaceae; g__unclassified; s__unclassified	0	0	0	4	0	1	0	0	0	2	0	2	0	0	7	0	0	8	7	2	7	1	4	7	1	2	0	0	0	1
OTU_11870	Unassigned	0	0	0	0	0	0	0	0	0	0	0	0	0	0	0	0	0	0	0	0	0	0	0	0	0	0	0	1	0	0
OTU_11871	d__Bacteria; p__Proteobacteria; c__Betaproteobacteria; o__Burkholderiales; f__Burkholderiaceae; g__unclassified; s__unclassified	0	0	0	0	0	0	0	0	0	0	0	0	0	0	0	0	0	0	0	0	0	0	0	0	0	0	0	1	0	0
OTU_11875	d__Bacteria; p__Actinobacteria; c__unclassified; o__Streptomycetales; f__Streptomycetaceae; g__unclassified; s__unclassified	0	0	0	0	0	0	0	0	0	0	0	0	0	0	0	0	0	0	1	0	0	0	0	0	0	0	0	2	0	0
OTU_1188	Unassigned	7	1	0	5	0	4	0	3	8	0	1	0	8	0	0	0	1	0	1	0	0	0	0	0	4	8	3	2	0	0
OTU_11884	Unassigned	0	0	0	0	0	0	0	0	0	0	0	0	0	0	0	0	0	0	0	0	0	0	0	0	0	0	0	2	0	0
OTU_11886	Unassigned	0	0	0	0	0	0	0	0	0	0	1	0	1	0	0	2	0	0	0	0	0	0	0	0	0	0	0	1	0	0
OTU_11887	d__Bacteria; p__Planctomycetes; c__Planctomycetia; o__Planctomycetales; f__Isosphaeraceae; g__unclassified; s__unclassified	0	0	0	0	0	0	0	0	0	0	0	0	0	0	0	0	0	0	0	0	0	0	0	0	0	0	0	2	0	0
OTU_11888	d__Bacteria; p__Proteobacteria; c__unclassified; o__unclassified; f__unclassified; g__unclassified; s__unclassified	0	0	0	0	0	0	0	0	0	0	0	0	0	0	0	0	0	0	0	0	0	0	0	0	0	0	0	1	0	0
OTU_11889	Unassigned	0	0	0	0	0	0	0	0	0	0	0	0	0	0	0	0	0	0	0	0	0	0	0	0	0	0	0	2	0	0
OTU_1189	d__Bacteria; p__Proteobacteria; c__Alphaproteobacteria; o__Rhodospirillales; f__Acetobacteraceae; g__unclassified; s__unclassified	2	3	3	1	3	0	1	1	4	3	4	0	2	13	0	0	1	5	7	1	0	3	5	1	0	0	1	0	1	0
OTU_11890	Unassigned	0	0	0	0	0	0	0	0	0	0	0	0	0	0	0	0	0	0	0	0	0	0	0	0	0	0	0	2	0	0
OTU_11895	Unassigned	0	0	0	0	0	0	0	0	0	0	0	0	0	0	0	0	0	0	0	0	0	0	0	0	0	0	0	2	0	0
OTU_11897	Unassigned	0	0	0	0	0	0	0	0	0	0	0	0	0	1	0	0	0	0	0	0	0	0	0	0	0	0	0	2	0	0
OTU_119	Unassigned	93	35	15	58	44	90	28	77	2	49	16	20	22	0	2	118	13	5	3	5	13	7	6	68	13	28	33	12	26	29
OTU_1190	Unassigned	0	0	0	0	0	2	0	0	0	0	0	0	0	0	11	0	0	0	2	4	1	2	0	0	4	0	0	0	4	0
OTU_11901	d__Bacteria; p__Planctomycetes; c__Planctomycetia; o__Planctomycetales; f__Isosphaeraceae; g__Paludisphaera; s__unclassified	0	0	0	0	0	0	0	0	0	0	0	0	0	0	0	0	0	1	0	0	0	0	0	0	2	0	0	0	0	0
OTU_11903	d__Bacteria; p__Planctomycetes; c__Planctomycetia; o__Planctomycetales; f__Gemmataceae; g__unclassified; s__unclassified	0	0	0	0	0	0	0	0	0	0	0	0	0	0	0	0	0	0	0	0	0	0	0	0	0	0	0	0	0	0
OTU_11905	d__Bacteria; p__Proteobacteria; c__Gammaproteobacteria; o__Pseudomonadales; f__Pseudomonadaceae; g__unclassified; s__unclassified	0	0	0	0	0	0	0	0	0	0	0	0	0	0	0	0	0	0	0	0	0	0	0	0	0	0	0	2	0	0
OTU_11906	d__Bacteria; p__Planctomycetes; c__Planctomycetia; o__Planctomycetales; f__unclassified; g__unclassified; s__unclassified	0	0	0	0	0	0	0	0	0	0	0	0	0	0	0	0	0	0	0	0	0	0	0	0	0	0	0	2	0	0
OTU_11907	d__Bacteria; p__unclassified; c__unclassified; o__unclassified; f__unclassified; g__unclassified; s__unclassified	0	0	0	1	0	0	0	0	0	0	0	0	0	0	0	0	2	0	0	0	0	0	0	0	0	0	0	1	0	0
OTU_1191	d__Bacteria; p__unclassified; c__unclassified; o__unclassified; f__unclassified; g__unclassified; s__unclassified	0	0	0	0	0	0	0	0	0	3	2	2	2	0	6	0	2	0	0	20	0	0	0	0	0	0	0	0	0	0
OTU_11915	Unassigned	0	0	0	0	0	1	0	1	1	0	1	0	0	0	1	0	0	0	1	0	1	1	0	0	0	1	0	2	1	0
OTU_11916	Unassigned	0	0	0	0	0	0	0	0	0	0	0	0	0	0	0	0	0	0	0	1	0	0	0	0	0	0	0	2	0	0
OTU_11919	Unassigned	0	0	1	0	0	0	0	0	0	0	1	1	0	0	0	0	0	0	0	0	0	0	0	0	0	0	1	3	0	0
OTU_1192	Unassigned	0	0	0	0	0	0	0	0	0	0	0	0	0	0	0	0	0	0	0	0	13	0	0	0	0	0	0	0	0	0
OTU_11920	d__Bacteria; p__Proteobacteria; c__Gammaproteobacteria; o__Xanthomonadales; f__Xanthomonadaceae; g__unclassified; s__unclassified	0	0	0	0	0	0	0	0	0	0	0	0	0	0	0	0	0	0	0	0	0	0	0	0	0	0	0	1	0	0
OTU_11921	d__Bacteria; p__Actinobacteria; c__unclassified; o__unclassified; f__unclassified; g__unclassified; s__unclassified	0	0	0	0	0	0	0	0	0	0	0	0	0	0	0	0	0	0	0	0	0	0	0	0	0	0	0	1	0	0
OTU_11926	Unassigned	0	0	0	0	0	0	0	0	0	0	0	0	0	0	0	0	0	0	0	0	0	0	0	0	0	0	0	2	0	0
OTU_11928	d__Bacteria; p__Proteobacteria; c__Gammaproteobacteria; o__Xanthomonadales; f__Xanthomonadaceae; g__unclassified; s__unclassified	0	0	0	0	0	0	0	0	0	0	0	0	0	0	0	0	0	0	0	0	0	0	0	0	0	0	0	2	0	0
OTU_1193	d__Bacteria; p__Planctomycetes; c__Planctomycetia; o__Planctomycetales; f__unclassified; g__unclassified; s__unclassified	0	0	0	0	0	0	0	0	0	0	0	0	0	3	7	0	0	5	8	0	15	0	0	0	0	0	0	0	0	0
OTU_11931	d__Bacteria; p__Proteobacteria; c__Alphaproteobacteria; o__Rhodospirillales; f__Acetobacteraceae; g__unclassified; s__unclassified	0	0	0	0	0	0	0	0	1	0	0	0	0	0	0	0	0	0	0	0	0	0	1	2	2	0	0	3	1	0
OTU_11935	d__Bacteria; p__Firmicutes; c__Bacilli; o__Bacillales; f__Bacillaceae; g__unclassified; s__unclassified	0	0	0	0	0	0	0	0	0	1	0	0	0	0	0	0	0	0	0	0	1	0	0	1	0	0	1	0	0	0
OTU_11936	d__Bacteria; p__unclassified; c__unclassified; o__unclassified; f__unclassified; g__unclassified; s__unclassified	0	0	0	0	0	0	0	0	0	0	0	0	0	0	0	0	0	0	0	0	0	0	0	0	0	0	0	1	0	0
OTU_1194	d__Bacteria; p__Actinobacteria; c__unclassified; o__Streptomycetales; f__Streptomycetaceae; g__unclassified; s__unclassified	10	5	0	4	6	0	4	1	0	3	1	0	0	0	0	1	10	0	0	0	0	0	0	7	0	7	1	0	3	5
OTU_11942	Unassigned	1	0	0	0	0	0	0	1	0	0	0	1	0	0	0	0	0	0	0	0	0	0	0	0	0	0	0	1	0	0
OTU_11944	d__Bacteria; p__Proteobacteria; c__Betaproteobacteria; o__Burkholderiales; f__Comamonadaceae; g__unclassified; s__unclassified	0	0	0	0	0	0	0	0	0	0	0	0	0	0	0	0	0	0	0	0	0	0	0	0	0	0	0	3	0	0
OTU_11949	Unassigned	0	0	0	0	0	0	0	0	0	0	0	0	0	0	0	0	0	0	0	0	0	0	0	0	1	0	0	2	0	1
OTU_1195	Unassigned	14	1	0	3	10	5	13	6	0	16	6	0	10	0	0	9	11	0	0	0	0	0	0	0	0	4	3	1	24	1
OTU_11950	d__Bacteria; p__Planctomycetes; c__Planctomycetia; o__Planctomycetales; f__unclassified; g__unclassified; s__unclassified	0	0	0	0	0	0	0	0	0	0	0	0	0	0	0	0	0	0	0	0	0	0	0	0	0	0	0	2	0	0
OTU_11953	Unassigned	0	0	0	0	0	0	0	0	0	0	0	0	0	0	0	0	0	0	0	0	0	0	0	0	0	0	0	3	0	0
OTU_11954	d__Bacteria; p__Actinobacteria; c__unclassified; o__Micromonosporales; f__Micromonosporaceae; g__Actinoplanes; s__unclassified	0	0	0	0	0	0	0	0	0	0	0	0	0	0	0	0	0	0	0	0	0	0	0	0	0	0	0	1	0	0
OTU_11956	d__Bacteria; p__Actinobacteria; c__unclassified; o__Streptomycetales; f__Streptomycetaceae; g__unclassified; s__unclassified	0	0	0	0	0	0	0	0	0	0	0	0	0	0	0	0	0	0	0	0	0	0	0	0	0	0	0	2	0	0
OTU_11957	d__Bacteria; p__Proteobacteria; c__Alphaproteobacteria; o__Rhodospirillales; f__Acetobacteraceae; g__unclassified; s__unclassified	0	0	0	0	0	0	0	0	0	0	0	0	0	0	0	0	0	0	0	0	0	0	0	0	0	0	0	1	0	0
OTU_11958	Unassigned	0	0	0	0	0	0	0	0	0	0	0	0	0	0	0	0	0	0	0	0	0	0	0	0	0	0	0	3	0	0
OTU_1196	d__Bacteria; p__Actinobacteria; c__unclassified; o__Streptomycetales; f__Streptomycetaceae; g__unclassified; s__unclassified	11	5	7	1	2	0	4	5	1	3	1	6	0	0	0	4	2	0	0	2	0	0	0	2	0	1	6	0	0	1
OTU_11960	d__Bacteria; p__unclassified; c__unclassified; o__unclassified; f__unclassified; g__unclassified; s__unclassified	0	0	0	0	0	0	0	0	0	0	0	0	0	1	0	0	0	0	1	0	0	0	0	0	0	0	0	1	0	0
OTU_11961	d__Bacteria; p__Actinobacteria; c__unclassified; o__Streptomycetales; f__Streptomycetaceae; g__unclassified; s__unclassified	0	0	0	0	0	0	0	0	0	0	0	0	0	0	0	0	0	0	0	0	0	0	0	0	0	1	0	0	0	1
OTU_11966	d__Bacteria; p__Planctomycetes; c__Planctomycetia; o__Planctomycetales; f__unclassified; g__unclassified; s__unclassified	0	0	0	0	0	0	0	0	0	0	0	0	0	0	0	0	0	0	0	0	0	0	0	2	0	0	0	3	0	1
OTU_11969	d__Bacteria; p__unclassified; c__unclassified; o__unclassified; f__unclassified; g__unclassified; s__unclassified	0	0	0	0	1	0	0	0	0	0	0	0	0	0	0	0	0	0	0	0	0	0	0	0	0	0	0	0	0	0
OTU_1197	d__Bacteria; p__Actinobacteria; c__unclassified; o__unclassified; f__unclassified; g__unclassified; s__unclassified	7	14	0	11	12	1	7	8	2	15	5	1	8	0	1	1	9	0	0	0	0	0	0	0	0	12	7	0	4	0
OTU_11972	d__Bacteria; p__unclassified; c__unclassified; o__unclassified; f__unclassified; g__unclassified; s__unclassified	0	0	0	0	0	0	1	0	0	0	0	0	0	0	0	1	0	0	0	0	0	0	0	0	0	0	0	1	0	0
OTU_11977	d__Bacteria; p__unclassified; c__unclassified; o__unclassified; f__unclassified; g__unclassified; s__unclassified	0	1	0	0	0	0	0	0	0	0	0	0	0	0	0	0	0	0	0	0	0	0	0	0	0	0	0	2	0	0
OTU_11979	Unassigned	0	0	1	0	0	0	0	0	0	0	0	0	0	0	0	0	0	0	0	0	0	0	0	0	0	0	0	0	0	0
OTU_1198	Unassigned	11	6	0	4	5	8	4	2	1	5	10	2	3	0	0	7	9	0	0	0	0	2	0	0	0	0	4	0	10	5
OTU_11980	d__Bacteria; p__Actinobacteria; c__unclassified; o__unclassified; f__unclassified; g__unclassified; s__unclassified	0	0	0	0	0	0	0	0	0	0	0	0	0	0	0	0	0	0	0	0	0	0	0	0	0	0	0	1	0	0
OTU_11981	d__Bacteria; p__Proteobacteria; c__Gammaproteobacteria; o__Xanthomonadales; f__Xanthomonadaceae; g__unclassified; s__unclassified	0	0	0	0	0	0	1	0	0	0	0	1	0	0	0	1	0	1	1	0	1	1	0	0	1	0	1	1	1	0
OTU_11985	d__Bacteria; p__Proteobacteria; c__Gammaproteobacteria; o__Xanthomonadales; f__Xanthomonadaceae; g__unclassified; s__unclassified	0	0	0	0	0	0	0	0	0	0	0	0	0	0	0	0	0	0	0	0	0	0	0	0	0	0	0	2	0	0
OTU_11988	Unassigned	0	0	0	0	0	0	0	0	0	0	0	0	0	0	0	0	0	0	0	0	0	0	0	0	0	0	2	0	0	0
OTU_1199	d__Bacteria; p__Actinobacteria; c__unclassified; o__Streptomycetales; f__Streptomycetaceae; g__unclassified; s__unclassified	11	11	12	2	11	4	3	3	2	10	8	14	23	3	0	9	3	5	2	13	0	2	5	2	3	18	11	2	11	0
OTU_11993	Unassigned	0	0	0	0	0	0	0	0	0	0	0	0	0	0	0	0	0	0	0	0	0	0	0	0	0	0	0	1	0	0
OTU_11994	d__Bacteria; p__Proteobacteria; c__Gammaproteobacteria; o__Xanthomonadales; f__Xanthomonadaceae; g__unclassified; s__unclassified	0	0	0	0	0	0	0	0	0	0	0	0	0	0	0	0	0	0	0	0	0	0	0	0	0	0	0	1	0	0
OTU_11995	d__Bacteria; p__unclassified; c__unclassified; o__unclassified; f__unclassified; g__unclassified; s__unclassified	0	0	0	0	0	0	0	0	0	0	0	1	1	0	0	0	0	1	2	1	0	0	0	0	0	0	0	2	0	0
OTU_12	d__Bacteria; p__Proteobacteria; c__Gammaproteobacteria; o__Pseudomonadales; f__Pseudomonadaceae; g__unclassified; s__unclassified	20	227	1	22	251	125	73	251	0	329	89	4	4	0	0	473	86	0	3	0	0	0	0	2	0	3	13	2	21	33
OTU_120	Unassigned	0	1	48	7	3	5	6	11	8	5	15	93	17	19	18	6	7	27	37	16	42	22	19	45	102	10	36	69	11	9
OTU_1200	d__Bacteria; p__Proteobacteria; c__Gammaproteobacteria; o__Xanthomonadales; f__Xanthomonadaceae; g__unclassified; s__unclassified	5	8	5	4	6	11	8	6	3	4	9	4	3	0	0	13	4	0	0	0	0	0	0	2	0	6	5	1	8	4
OTU_12001	d__Bacteria; p__Actinobacteria; c__unclassified; o__Streptomycetales; f__Streptomycetaceae; g__unclassified; s__unclassified	0	1	0	0	0	0	1	0	0	1	1	0	0	0	0	0	0	0	0	0	0	0	0	0	0	0	1	1	0	0
OTU_12003	d__Bacteria; p__Proteobacteria; c__Gammaproteobacteria; o__Xanthomonadales; f__Xanthomonadaceae; g__unclassified; s__unclassified	0	0	0	0	0	0	0	0	0	0	0	0	0	0	0	0	0	0	0	0	0	0	0	0	0	0	0	1	0	0
OTU_12005	d__Bacteria; p__Firmicutes; c__Bacilli; o__Bacillales; f__Paenibacillaceae; g__unclassified; s__unclassified	0	0	0	0	0	0	0	0	0	0	0	0	0	0	0	0	0	0	0	0	0	0	0	0	0	0	0	2	0	0
OTU_1201	Unassigned	4	0	11	3	0	2	4	5	1	2	0	0	2	0	0	2	3	1	6	0	0	0	1	2	0	5	2	1	2	1
OTU_12012	Unassigned	0	0	0	0	0	0	0	0	0	0	0	0	0	0	0	0	0	0	0	0	0	0	0	0	0	0	0	2	0	0
OTU_12013	d__Bacteria; p__unclassified; c__unclassified; o__unclassified; f__unclassified; g__unclassified; s__unclassified	0	0	0	0	1	0	0	0	0	0	0	0	0	0	0	0	0	0	0	0	0	0	0	0	0	0	0	2	0	0
OTU_12015	Unassigned	0	0	0	0	0	0	0	0	0	0	0	0	0	0	0	0	1	0	0	0	0	0	0	0	0	0	0	1	0	0
OTU_12016	Unassigned	0	0	0	0	0	0	0	0	0	0	0	0	0	0	0	0	0	0	0	0	0	0	0	0	0	0	0	2	0	0
OTU_12018	Unassigned	0	0	0	0	0	0	0	0	0	0	0	0	0	0	1	0	0	0	1	0	0	0	0	0	0	0	0	2	0	0
OTU_1202	Unassigned	7	5	16	0	0	0	0	1	6	0	0	4	2	3	0	2	0	0	0	7	6	1	0	4	0	1	2	0	7	0
OTU_12020	Unassigned	0	0	0	0	0	0	0	0	0	0	0	0	0	0	0	0	0	0	0	0	0	1	0	0	0	0	0	1	0	0
OTU_12021	d__Bacteria; p__unclassified; c__unclassified; o__unclassified; f__unclassified; g__unclassified; s__unclassified	0	0	0	0	0	0	0	0	0	0	0	0	0	0	0	0	1	0	0	0	0	0	0	1	0	0	0	2	0	0
OTU_12022	Unassigned	0	0	0	0	0	0	2	0	0	0	0	0	0	0	0	0	0	0	0	0	0	0	0	0	0	0	0	0	0	0
OTU_12023	d__Bacteria; p__Firmicutes; c__Bacilli; o__Bacillales; f__Paenibacillaceae; g__unclassified; s__unclassified	0	0	0	0	0	0	0	0	0	0	0	0	0	0	0	0	0	0	0	0	0	0	0	0	0	0	0	0	1	0
OTU_12025	Unassigned	0	0	0	0	0	0	0	0	0	0	0	0	0	0	0	0	1	0	0	0	0	0	0	0	0	0	0	0	2	0
OTU_12026	d__Bacteria; p__Proteobacteria; c__Alphaproteobacteria; o__Caulobacterales; f__Caulobacteraceae; g__Phenylobacterium; s__unclassified	0	0	0	0	0	0	0	0	0	0	0	0	0	0	0	0	0	0	0	0	0	0	0	0	0	0	0	0	1	0
OTU_12027	Unassigned	0	0	0	0	0	0	0	0	0	0	0	0	0	0	0	0	0	0	0	0	0	0	0	0	0	0	0	0	2	0
OTU_12028	d__Bacteria; p__unclassified; c__unclassified; o__unclassified; f__unclassified; g__unclassified; s__unclassified	0	0	0	0	0	0	0	1	0	0	0	0	1	0	0	1	0	0	0	0	0	0	0	0	0	0	0	0	1	0
OTU_1203	d__Bacteria; p__Actinobacteria; c__unclassified; o__Streptomycetales; f__Streptomycetaceae; g__unclassified; s__unclassified	0	0	0	0	0	0	0	0	0	0	0	0	0	0	0	0	0	0	0	0	0	0	0	0	0	0	0	0	0	0
OTU_12031	Unassigned	0	0	0	0	0	0	0	0	0	0	0	0	0	0	0	0	0	0	0	0	0	0	0	1	0	0	0	0	1	0
OTU_1204	d__Bacteria; p__unclassified; c__unclassified; o__unclassified; f__unclassified; g__unclassified; s__unclassified	0	0	1	2	0	0	3	0	0	0	0	0	2	0	2	0	0	5	0	1	3	0	0	0	0	1	1	0	0	0
OTU_12043	d__Bacteria; p__Proteobacteria; c__Alphaproteobacteria; o__Rhizobiales; f__unclassified; g__unclassified; s__unclassified	0	0	0	0	0	0	0	0	0	0	0	0	0	0	0	0	0	0	0	0	0	0	0	0	0	0	0	0	2	0
OTU_12044	Unassigned	0	0	0	0	0	0	0	0	0	0	0	0	1	0	0	0	0	0	0	0	0	0	0	0	0	0	0	0	2	1
OTU_12047	Unassigned	0	0	0	0	0	0	0	0	0	0	0	0	0	0	0	0	0	0	0	0	0	0	0	0	0	0	0	0	1	0
OTU_1205	Unassigned	0	1	0	0	0	1	0	0	0	0	0	1	0	0	3	0	1	5	4	1	7	3	4	1	4	2	0	0	0	1
OTU_12051	Unassigned	0	0	0	0	0	0	0	0	0	0	0	0	0	0	0	0	1	0	0	0	0	0	0	0	0	0	0	0	1	0
OTU_12052	Unassigned	0	0	0	0	0	0	0	0	0	0	0	0	0	0	0	0	0	0	0	0	0	0	0	0	0	0	0	0	2	0
OTU_12053	d__Bacteria; p__Actinobacteria; c__unclassified; o__Streptomycetales; f__Streptomycetaceae; g__unclassified; s__unclassified	0	1	0	0	0	0	0	0	0	0	0	0	0	1	0	0	1	0	0	0	0	0	0	0	0	0	0	0	2	1
OTU_12054	d__Bacteria; p__Proteobacteria; c__Alphaproteobacteria; o__Rhizobiales; f__Methylocystaceae; g__unclassified; s__unclassified	0	0	0	0	0	0	0	0	0	0	0	0	0	0	0	0	0	0	0	0	0	0	0	0	0	0	0	0	1	0
OTU_12055	d__Bacteria; p__unclassified; c__unclassified; o__unclassified; f__unclassified; g__unclassified; s__unclassified	0	0	0	0	0	0	0	0	0	0	0	0	0	0	0	0	2	0	0	0	0	0	0	0	0	0	0	0	1	0
OTU_12059	d__Bacteria; p__Planctomycetes; c__Planctomycetia; o__Planctomycetales; f__Isosphaeraceae; g__unclassified; s__unclassified	0	0	0	0	0	0	0	0	0	0	0	0	0	0	0	0	0	0	0	0	0	0	0	0	0	0	0	0	2	0
OTU_1206	d__Bacteria; p__Planctomycetes; c__Planctomycetia; o__Planctomycetales; f__unclassified; g__unclassified; s__unclassified	0	0	4	12	0	2	0	0	0	0	0	5	0	0	0	0	0	0	0	0	0	0	0	2	0	0	2	0	0	0
OTU_12060	d__Bacteria; p__Planctomycetes; c__Planctomycetia; o__Planctomycetales; f__unclassified; g__unclassified; s__unclassified	0	0	0	0	1	0	0	0	0	0	0	0	0	0	0	0	0	0	0	0	0	0	0	0	0	0	0	0	1	0
OTU_12063	Unassigned	0	0	0	0	0	0	0	0	0	0	0	0	0	0	0	0	0	0	0	0	0	0	0	0	0	0	0	0	2	0
OTU_12066	d__Bacteria; p__Planctomycetes; c__Planctomycetia; o__Planctomycetales; f__unclassified; g__unclassified; s__unclassified	0	0	0	0	0	0	0	0	0	0	0	0	0	0	0	0	0	0	0	0	0	0	0	0	0	0	0	0	2	0
OTU_12068	Unassigned	0	0	0	0	0	0	0	0	0	0	1	0	0	0	1	1	0	0	0	1	0	0	0	0	1	0	0	0	1	0
OTU_1207	d__Bacteria; p__Planctomycetes; c__Planctomycetia; o__Planctomycetales; f__unclassified; g__unclassified; s__unclassified	2	1	0	0	11	0	0	10	0	7	0	0	0	0	0	0	6	0	0	6	0	0	1	0	0	4	1	0	1	2
OTU_12073	Unassigned	0	0	0	0	0	0	0	0	0	0	0	0	0	0	0	0	0	0	0	0	0	0	0	1	0	0	0	0	2	1
OTU_12075	d__Bacteria; p__Actinobacteria; c__unclassified; o__Streptomycetales; f__Streptomycetaceae; g__unclassified; s__unclassified	0	0	0	0	0	0	0	0	0	0	0	0	0	0	0	0	0	0	0	0	0	0	1	0	0	0	0	0	1	0
OTU_12076	Unassigned	0	0	0	0	0	0	0	0	0	0	0	0	0	0	0	0	0	0	0	0	0	0	0	0	0	1	0	0	0	0
OTU_12077	Unassigned	0	0	0	0	0	0	0	0	0	0	0	0	0	0	0	0	0	0	0	0	0	0	0	0	1	0	0	0	0	0
OTU_12079	Unassigned	0	0	0	0	0	0	0	0	0	0	0	0	0	0	0	0	0	0	0	0	0	0	0	0	0	0	0	0	1	0
OTU_1208	Unassigned	4	3	2	9	3	16	3	5	0	9	0	4	4	0	0	6	5	0	0	1	0	0	0	3	1	9	8	5	17	2
OTU_12084	d__Bacteria; p__Proteobacteria; c__Gammaproteobacteria; o__Xanthomonadales; f__Xanthomonadaceae; g__unclassified; s__unclassified	1	0	0	0	0	1	1	4	0	1	0	0	4	0	0	2	0	0	0	0	0	0	0	0	0	4	0	0	1	0
OTU_12085	d__Bacteria; p__Actinobacteria; c__unclassified; o__Streptomycetales; f__Streptomycetaceae; g__unclassified; s__unclassified	0	0	0	0	0	0	0	0	0	0	0	0	0	0	0	0	0	0	0	0	0	0	0	0	0	0	0	0	2	0
OTU_12086	Unassigned	0	0	0	0	0	0	0	0	1	0	0	0	0	0	0	0	0	0	0	0	0	0	0	0	0	0	0	0	1	0
OTU_12087	d__Bacteria; p__Actinobacteria; c__unclassified; o__Micrococcales; f__Micrococcaceae; g__unclassified; s__unclassified	0	0	0	0	0	0	0	0	0	1	0	0	0	0	0	0	0	0	0	0	0	0	0	0	0	0	1	0	2	0
OTU_12088	d__Bacteria; p__Actinobacteria; c__unclassified; o__Streptomycetales; f__Streptomycetaceae; g__unclassified; s__unclassified	0	0	0	0	0	0	0	1	0	0	0	0	0	0	0	1	0	0	0	0	0	0	0	0	0	0	0	0	2	0
OTU_12089	d__Bacteria; p__Proteobacteria; c__Alphaproteobacteria; o__Sphingomonadales; f__Sphingomonadaceae; g__unclassified; s__unclassified	0	0	0	1	0	0	0	0	0	1	0	0	0	0	0	0	0	0	0	0	0	0	0	0	0	0	0	0	2	0
OTU_1209	d__Bacteria; p__Planctomycetes; c__Planctomycetia; o__Planctomycetales; f__Gemmataceae; g__unclassified; s__unclassified	5	4	0	0	7	10	0	6	0	4	2	8	0	0	0	10	4	0	0	0	0	3	0	0	0	2	0	0	0	9
OTU_12090	Unassigned	0	0	0	0	0	0	0	0	0	0	0	0	0	0	0	0	0	0	0	0	0	0	0	0	0	0	0	0	1	0
OTU_12092	d__Bacteria; p__Proteobacteria; c__Alphaproteobacteria; o__Rhizobiales; f__Bradyrhizobiaceae; g__Bradyrhizobium; s__unclassified	0	0	0	0	0	0	0	0	0	0	0	0	0	0	0	0	0	0	0	0	0	0	0	0	0	0	0	0	2	0
OTU_12094	d__Bacteria; p__unclassified; c__unclassified; o__unclassified; f__unclassified; g__unclassified; s__unclassified	0	0	0	0	0	0	0	0	0	0	0	0	0	0	0	0	0	0	0	0	0	0	0	0	0	0	0	0	1	0
OTU_12095	d__Bacteria; p__Actinobacteria; c__unclassified; o__unclassified; f__unclassified; g__unclassified; s__unclassified	1	0	0	0	0	0	0	0	0	0	0	0	0	0	0	0	0	0	0	0	0	0	0	0	0	0	0	0	1	0
OTU_12099	d__Bacteria; p__Actinobacteria; c__unclassified; o__Pseudonocardiales; f__Pseudonocardiaceae; g__unclassified; s__unclassified	2	0	0	0	0	0	0	0	0	0	0	0	0	0	0	0	0	0	0	0	0	0	0	0	0	0	0	0	1	1
OTU_121	Unassigned	21	22	93	67	14	37	21	18	31	42	63	78	72	32	13	75	29	4	14	85	42	51	15	110	19	58	112	115	64	25
OTU_1210	d__Bacteria; p__Proteobacteria; c__Alphaproteobacteria; o__Caulobacterales; f__Caulobacteraceae; g__unclassified; s__unclassified	0	0	0	0	0	0	0	0	0	0	0	0	0	0	0	1	0	0	0	0	0	0	0	0	0	0	0	14	0	0
OTU_12101	Unassigned	0	1	0	0	0	0	0	0	0	0	0	0	0	0	0	0	0	0	0	0	0	0	0	0	0	0	1	0	0	0
OTU_12103	d__Bacteria; p__Actinobacteria; c__unclassified; o__unclassified; f__unclassified; g__unclassified; s__unclassified	0	0	0	0	0	0	0	0	0	0	0	0	0	0	0	0	0	0	0	0	0	0	0	0	0	0	0	0	1	0
OTU_12104	d__Bacteria; p__Planctomycetes; c__Planctomycetia; o__Planctomycetales; f__Planctomycetaceae; g__unclassified; s__unclassified	0	0	0	0	0	0	0	0	0	0	0	0	0	0	0	1	0	0	0	0	0	0	0	0	0	0	0	0	0	0
OTU_12107	Unassigned	0	0	0	0	0	0	0	0	0	0	0	0	0	0	0	1	0	0	0	0	0	0	0	0	0	0	0	0	2	0
OTU_12108	Unassigned	0	0	0	0	0	0	0	0	0	0	0	0	0	0	0	0	0	0	0	0	0	0	0	0	0	0	0	0	2	0
OTU_1211	d__Bacteria; p__Actinobacteria; c__unclassified; o__Streptomycetales; f__Streptomycetaceae; g__unclassified; s__unclassified	0	4	4	2	8	7	0	10	2	2	2	0	8	0	0	5	11	1	0	0	0	0	0	5	1	8	4	1	15	3
OTU_12114	d__Bacteria; p__Actinobacteria; c__unclassified; o__Streptomycetales; f__Streptomycetaceae; g__unclassified; s__unclassified	0	0	0	0	0	0	0	0	0	0	0	0	0	0	0	0	0	0	0	0	0	0	0	0	0	0	0	0	1	0
OTU_12115	Unassigned	0	0	0	0	1	0	0	0	0	0	0	0	0	0	0	1	0	0	0	0	0	0	0	0	0	0	0	0	2	0
OTU_12116	d__Bacteria; p__Planctomycetes; c__Planctomycetia; o__Planctomycetales; f__unclassified; g__unclassified; s__unclassified	0	0	0	0	0	0	0	0	0	0	0	0	0	0	0	0	0	0	0	0	0	0	0	0	0	0	0	0	2	0
OTU_12118	d__Bacteria; p__Actinobacteria; c__unclassified; o__Streptomycetales; f__Streptomycetaceae; g__unclassified; s__unclassified	0	0	0	0	0	0	0	0	0	0	0	0	0	0	0	0	0	0	0	0	0	0	0	0	0	0	0	0	1	0
OTU_12119	d__Bacteria; p__Actinobacteria; c__unclassified; o__Streptomycetales; f__Streptomycetaceae; g__unclassified; s__unclassified	0	0	0	0	0	0	0	0	0	0	0	0	0	0	0	0	0	0	0	0	0	0	0	0	0	0	0	0	1	0
OTU_1212	d__Bacteria; p__Proteobacteria; c__Gammaproteobacteria; o__Xanthomonadales; f__Xanthomonadaceae; g__unclassified; s__unclassified	0	3	0	6	0	5	0	4	0	0	0	0	0	0	0	1	2	0	0	0	0	0	0	0	0	0	6	0	2	23
OTU_12121	d__Bacteria; p__Actinobacteria; c__unclassified; o__Streptomycetales; f__Streptomycetaceae; g__unclassified; s__unclassified	0	1	0	0	2	0	0	1	0	0	0	0	1	0	0	0	0	0	0	0	0	0	0	0	0	0	0	0	1	0
OTU_12124	Unassigned	0	0	0	0	0	0	0	0	0	0	0	0	0	0	0	0	0	0	0	0	0	0	0	0	0	0	0	0	2	0
OTU_12125	Unassigned	0	0	0	0	0	0	0	0	0	0	0	0	0	0	0	0	0	0	0	0	0	0	0	0	0	0	0	0	2	0
OTU_12128	d__Bacteria; p__Proteobacteria; c__Betaproteobacteria; o__Burkholderiales; f__Comamonadaceae; g__unclassified; s__unclassified	0	0	0	0	0	0	0	1	0	0	0	0	0	0	0	0	0	0	0	0	0	0	0	0	0	0	0	0	3	0
OTU_12129	d__Bacteria; p__unclassified; c__unclassified; o__unclassified; f__unclassified; g__unclassified; s__unclassified	0	0	0	0	0	0	0	0	0	0	0	0	0	0	0	0	0	0	0	0	0	0	0	0	0	0	0	0	1	0
OTU_1213	Unassigned	6	0	1	2	0	0	1	3	1	3	1	3	0	0	0	0	2	0	0	0	0	0	0	0	3	0	1	5	7	0
OTU_12131	Unassigned	0	0	0	0	0	0	0	0	0	0	0	1	0	0	0	0	0	0	0	0	0	0	0	0	0	0	0	0	2	0
OTU_12132	Unassigned	0	0	0	0	0	0	0	0	0	0	0	0	0	0	0	0	0	0	0	0	0	0	0	0	0	0	0	0	1	0
OTU_12134	d__Bacteria; p__unclassified; c__unclassified; o__unclassified; f__unclassified; g__unclassified; s__unclassified	0	0	0	1	0	0	0	0	0	1	0	0	0	0	0	0	0	0	0	0	0	0	0	0	0	0	0	0	1	0
OTU_12136	Unassigned	0	0	0	0	0	0	0	0	0	0	0	0	0	0	0	0	0	0	0	0	0	0	0	0	0	0	0	0	1	0
OTU_12137	d__Bacteria; p__Proteobacteria; c__unclassified; o__unclassified; f__unclassified; g__unclassified; s__unclassified	0	0	0	0	0	0	0	0	0	0	0	0	0	0	0	0	0	0	0	0	0	0	0	0	0	0	0	0	2	0
OTU_12138	d__Bacteria; p__Actinobacteria; c__unclassified; o__Pseudonocardiales; f__Pseudonocardiaceae; g__unclassified; s__unclassified	0	0	1	0	0	0	0	0	1	0	0	2	0	0	0	0	0	0	0	0	0	0	0	0	0	0	2	0	1	1
OTU_12139	d__Bacteria; p__Planctomycetes; c__Planctomycetia; o__Planctomycetales; f__unclassified; g__unclassified; s__unclassified	0	0	0	0	0	0	0	0	0	0	0	0	0	0	0	0	0	0	0	0	0	0	0	0	0	0	0	0	2	0
OTU_1214	Unassigned	0	0	0	0	0	1	0	0	0	0	0	0	1	0	0	0	0	0	0	0	0	0	7	0	0	0	0	0	3	0
OTU_12140	d__Bacteria; p__unclassified; c__unclassified; o__unclassified; f__unclassified; g__unclassified; s__unclassified	0	0	0	0	0	0	0	0	0	0	0	0	2	0	0	0	0	0	0	0	0	0	0	0	0	0	0	0	2	0
OTU_12141	Unassigned	0	0	0	0	0	0	0	0	0	0	0	0	0	0	0	0	0	0	0	0	0	0	0	0	0	0	0	0	1	0
OTU_12143	d__Bacteria; p__Planctomycetes; c__Planctomycetia; o__Planctomycetales; f__Gemmataceae; g__unclassified; s__unclassified	0	0	0	0	0	0	0	0	0	0	0	0	0	0	0	0	0	0	0	0	0	0	0	0	0	0	0	0	1	0
OTU_12147	Unassigned	0	0	0	0	0	0	0	0	0	0	0	0	1	0	0	0	0	0	0	0	0	0	0	0	0	0	0	0	2	0
OTU_12150	d__Bacteria; p__Proteobacteria; c__Alphaproteobacteria; o__Rhizobiales; f__Bradyrhizobiaceae; g__Bradyrhizobium; s__unclassified	0	0	0	1	0	0	0	0	0	0	0	0	2	0	0	0	0	0	0	0	0	0	1	0	0	0	0	0	2	1
OTU_12157	d__Bacteria; p__Proteobacteria; c__Gammaproteobacteria; o__Pseudomonadales; f__Pseudomonadaceae; g__unclassified; s__unclassified	0	0	0	0	0	0	0	0	0	0	0	0	0	0	0	0	0	0	0	0	0	0	0	0	0	0	0	0	2	0
OTU_12158	Unassigned	0	0	0	0	0	0	0	0	0	0	0	0	0	0	0	0	0	0	0	0	0	0	0	0	0	0	0	0	1	0
OTU_12159	Unassigned	0	0	0	0	0	0	0	0	0	0	0	0	0	0	0	0	0	0	0	0	0	0	0	0	0	0	0	0	1	0
OTU_1216	Unassigned	4	2	3	16	6	5	9	0	2	7	14	0	12	1	0	4	7	1	0	3	2	4	0	2	0	2	2	2	13	7
OTU_12160	Unassigned	0	0	0	0	0	0	0	0	0	0	0	0	0	0	0	0	0	0	0	0	0	0	0	0	0	0	0	0	1	0
OTU_12162	d__Bacteria; p__Actinobacteria; c__unclassified; o__Streptomycetales; f__Streptomycetaceae; g__unclassified; s__unclassified	0	0	0	0	0	0	0	0	0	0	0	0	0	0	0	0	0	0	0	0	0	0	0	0	0	0	0	0	3	0
OTU_12164	d__Bacteria; p__Actinobacteria; c__unclassified; o__unclassified; f__unclassified; g__unclassified; s__unclassified	0	0	0	0	0	0	0	0	1	0	0	0	0	0	0	0	0	0	0	0	0	0	0	0	0	0	0	0	2	0
OTU_12165	Unassigned	0	0	0	0	0	0	0	0	0	0	0	0	0	0	0	0	0	0	0	0	0	0	0	0	0	0	0	0	2	0
OTU_12166	d__Bacteria; p__Actinobacteria; c__unclassified; o__Streptomycetales; f__Streptomycetaceae; g__Streptomyces; s__unclassified	0	0	0	0	0	0	0	0	0	0	0	0	0	0	0	0	0	0	0	0	0	0	0	0	0	0	0	0	1	0
OTU_12170	Unassigned	0	0	0	0	0	0	0	0	0	0	0	0	0	0	0	0	0	0	0	0	0	0	0	0	0	0	0	1	2	0
OTU_12172	d__Bacteria; p__Actinobacteria; c__unclassified; o__unclassified; f__unclassified; g__unclassified; s__unclassified	0	0	0	0	0	0	0	0	0	0	0	0	0	0	0	0	0	0	0	0	0	0	0	0	0	0	0	0	2	2
OTU_12174	d__Bacteria; p__Actinobacteria; c__unclassified; o__unclassified; f__unclassified; g__unclassified; s__unclassified	0	0	1	0	0	0	3	0	0	0	0	1	0	0	0	0	0	0	0	0	0	0	0	0	0	0	0	0	2	2
OTU_12177	d__Bacteria; p__unclassified; c__unclassified; o__unclassified; f__unclassified; g__unclassified; s__unclassified	0	0	0	0	0	0	0	0	0	0	0	0	1	0	0	0	0	0	1	0	0	0	0	0	0	0	1	0	2	0
OTU_12179	d__Bacteria; p__unclassified; c__unclassified; o__unclassified; f__unclassified; g__unclassified; s__unclassified	0	0	0	1	0	0	0	0	0	0	0	0	0	0	0	0	0	0	0	0	0	0	0	0	0	0	0	0	1	0
OTU_1218	d__Bacteria; p__Actinobacteria; c__unclassified; o__Streptomycetales; f__Streptomycetaceae; g__unclassified; s__unclassified	2	0	2	2	2	10	7	7	4	7	3	25	5	1	1	6	9	10	1	2	3	5	0	3	5	2	3	6	1	10
OTU_12180	d__Bacteria; p__unclassified; c__unclassified; o__unclassified; f__unclassified; g__unclassified; s__unclassified	0	0	0	0	0	0	0	0	0	0	0	0	0	0	0	0	0	0	0	0	0	0	0	0	0	0	0	0	2	0
OTU_12181	Unassigned	0	0	0	0	1	0	0	0	0	0	0	1	0	0	0	1	0	0	0	0	0	0	2	0	0	0	0	0	1	0
OTU_12183	Unassigned	0	0	0	0	0	0	0	0	0	0	1	0	0	0	0	0	0	0	0	0	0	0	0	0	0	0	0	0	2	0
OTU_12186	d__Bacteria; p__Actinobacteria; c__unclassified; o__Frankiales; f__Frankiaceae; g__unclassified; s__unclassified	0	0	0	0	0	0	0	0	0	0	0	0	0	0	0	0	0	0	0	0	0	0	0	0	0	0	0	0	3	0
OTU_12187	Unassigned	0	0	0	0	0	0	0	0	0	0	0	0	1	0	0	0	0	0	0	0	0	0	0	0	0	0	0	0	2	0
OTU_12188	Unassigned	0	0	0	0	0	0	0	0	0	0	0	0	0	0	0	0	0	0	0	0	0	0	0	0	0	0	0	0	1	0
OTU_12189	Unassigned	0	0	0	0	0	0	0	0	0	1	1	0	0	0	0	0	0	0	0	0	0	0	0	0	0	0	0	0	1	0
OTU_1219	Unassigned	4	1	0	0	1	0	0	1	0	2	4	1	3	0	2	2	0	6	2	2	6	0	2	4	5	1	2	1	6	4
OTU_12190	d__Bacteria; p__Actinobacteria; c__unclassified; o__unclassified; f__unclassified; g__unclassified; s__unclassified	0	0	0	0	0	0	0	0	0	0	0	0	0	0	0	0	0	0	0	0	0	0	1	0	0	1	0	0	1	0
OTU_12196	d__Bacteria; p__unclassified; c__unclassified; o__unclassified; f__unclassified; g__unclassified; s__unclassified	0	0	0	0	0	0	0	0	0	0	0	0	0	0	0	0	0	0	0	0	0	0	0	0	0	0	0	0	1	0
OTU_12198	d__Bacteria; p__Actinobacteria; c__unclassified; o__unclassified; f__unclassified; g__unclassified; s__unclassified	0	0	0	0	0	0	0	0	0	0	0	0	0	0	0	0	0	0	0	0	0	0	3	0	0	0	0	0	2	0
OTU_122	d__Bacteria; p__Proteobacteria; c__Alphaproteobacteria; o__Caulobacterales; f__Caulobacteraceae; g__unclassified; s__unclassified	0	0	10	1	18	11	4	7	3	2	2	42	1	4	5	5	1	14	0	2	0	3	0	5	117	5	1	10	2	0
OTU_1220	d__Bacteria; p__Proteobacteria; c__Alphaproteobacteria; o__Rhodospirillales; f__Acetobacteraceae; g__unclassified; s__unclassified	0	0	0	0	2	0	1	0	0	0	2	0	2	6	0	0	0	8	1	1	0	3	0	0	1	0	0	7	0	2
OTU_12201	Unassigned	0	0	0	0	0	0	0	0	0	0	0	0	0	0	0	0	0	0	0	0	0	0	0	0	0	0	0	0	2	0
OTU_12206	d__Bacteria; p__Actinobacteria; c__unclassified; o__Streptomycetales; f__Streptomycetaceae; g__unclassified; s__unclassified	0	0	0	0	0	0	0	0	0	0	0	0	0	0	0	0	0	0	0	0	0	0	0	0	0	0	0	0	2	0
OTU_12209	d__Bacteria; p__Proteobacteria; c__Gammaproteobacteria; o__Pseudomonadales; f__Pseudomonadaceae; g__unclassified; s__unclassified	0	0	0	0	0	0	0	0	0	0	0	0	0	0	0	1	0	0	0	0	0	0	0	0	0	0	0	0	1	0
OTU_1221	Unassigned	0	0	0	0	0	0	0	0	0	0	0	0	0	2	1	0	0	5	5	1	0	1	3	0	1	1	0	1	1	0
OTU_12210	Unassigned	0	0	0	0	0	0	0	0	0	0	0	0	0	0	0	0	0	0	0	0	0	0	0	0	0	0	0	0	1	0
OTU_12213	d__Bacteria; p__unclassified; c__unclassified; o__unclassified; f__unclassified; g__unclassified; s__unclassified	0	0	0	0	0	0	0	0	0	0	0	0	0	0	0	0	0	0	0	0	0	0	0	0	0	0	0	0	2	0
OTU_12216	d__Bacteria; p__Actinobacteria; c__unclassified; o__Streptomycetales; f__Streptomycetaceae; g__unclassified; s__unclassified	1	0	0	0	0	0	0	0	0	0	0	0	0	0	0	0	0	0	0	1	0	0	0	0	0	0	0	0	0	0
OTU_12217	Unassigned	0	0	0	0	0	0	0	0	0	0	0	0	0	0	0	0	0	0	0	0	0	0	0	0	0	0	0	0	1	0
OTU_12218	d__Bacteria; p__Proteobacteria; c__Alphaproteobacteria; o__Rhodospirillales; f__unclassified; g__unclassified; s__unclassified	0	0	0	0	0	0	0	0	0	0	0	0	0	0	0	0	0	0	0	0	0	0	0	0	0	0	0	0	3	0
OTU_12219	Unassigned	0	0	0	0	0	0	0	0	0	0	0	0	0	0	0	0	0	0	0	0	0	0	0	0	0	0	0	0	2	0
OTU_1222	d__Bacteria; p__Planctomycetes; c__Planctomycetia; o__Planctomycetales; f__Gemmataceae; g__unclassified; s__unclassified	7	7	1	3	4	3	8	6	6	13	8	0	0	2	0	9	6	0	0	0	0	3	2	0	5	1	3	1	0	0
OTU_12220	Unassigned	0	1	0	0	0	0	0	0	0	0	0	0	0	0	0	0	0	0	0	0	0	0	0	0	0	0	0	0	1	0
OTU_12223	d__Bacteria; p__Planctomycetes; c__Planctomycetia; o__Planctomycetales; f__Isosphaeraceae; g__unclassified; s__unclassified	0	0	0	0	0	0	0	0	0	0	0	0	0	0	0	0	0	0	0	0	0	0	0	0	0	0	0	0	2	0
OTU_12226	d__Bacteria; p__Actinobacteria; c__unclassified; o__Frankiales; f__Frankiaceae; g__unclassified; s__unclassified	0	0	0	0	0	0	0	0	0	0	0	0	0	0	0	0	0	0	0	0	0	0	0	0	0	0	0	0	2	0
OTU_12229	d__Bacteria; p__Proteobacteria; c__Gammaproteobacteria; o__Xanthomonadales; f__Xanthomonadaceae; g__unclassified; s__unclassified	0	0	0	0	0	0	0	0	0	0	0	0	0	0	0	0	0	0	0	0	0	0	0	0	0	0	0	0	1	0
OTU_1223	Unassigned	1	4	3	0	4	2	0	5	0	8	1	6	1	0	0	12	5	0	0	0	0	0	0	0	0	0	5	0	0	6
OTU_12231	d__Bacteria; p__Actinobacteria; c__unclassified; o__unclassified; f__unclassified; g__unclassified; s__unclassified	0	0	0	0	0	0	0	0	0	0	0	0	0	0	0	0	0	0	0	0	0	0	0	0	0	0	0	0	2	0
OTU_12236	d__Bacteria; p__Proteobacteria; c__Alphaproteobacteria; o__Caulobacterales; f__Caulobacteraceae; g__unclassified; s__unclassified	0	0	0	0	0	0	0	0	0	0	0	1	0	0	0	0	0	0	0	0	0	0	0	0	0	0	0	0	1	0
OTU_12238	Unassigned	0	0	0	0	0	0	0	0	0	0	0	0	1	0	0	0	0	0	0	0	0	1	0	0	0	0	0	0	1	0
OTU_1224	d__Bacteria; p__Actinobacteria; c__unclassified; o__Streptomycetales; f__Streptomycetaceae; g__unclassified; s__unclassified	0	2	0	0	7	5	12	4	4	0	5	0	0	0	0	1	5	0	3	0	0	0	0	0	0	0	5	0	2	0
OTU_12241	d__Bacteria; p__Proteobacteria; c__Alphaproteobacteria; o__Rhodospirillales; f__Acetobacteraceae; g__unclassified; s__unclassified	0	0	0	0	0	0	0	0	0	0	0	0	0	0	0	0	0	0	0	0	0	0	0	0	0	0	0	1	2	0
OTU_12244	d__Bacteria; p__Actinobacteria; c__unclassified; o__Streptomycetales; f__Streptomycetaceae; g__unclassified; s__unclassified	0	1	0	0	0	0	0	0	0	0	0	1	0	0	0	0	0	0	0	0	2	0	0	2	0	1	0	0	2	0
OTU_12245	d__Bacteria; p__Planctomycetes; c__Planctomycetia; o__Planctomycetales; f__unclassified; g__unclassified; s__unclassified	0	0	0	0	0	0	0	0	0	0	0	0	0	0	0	0	0	0	0	1	0	0	0	0	0	0	0	0	1	0
OTU_12247	d__Bacteria; p__Planctomycetes; c__Planctomycetia; o__Planctomycetales; f__unclassified; g__unclassified; s__unclassified	1	0	0	0	0	0	0	0	0	1	0	0	0	0	0	2	0	0	1	0	0	0	0	0	0	0	0	0	4	0
OTU_12248	d__Bacteria; p__Actinobacteria; c__unclassified; o__Streptomycetales; f__Streptomycetaceae; g__unclassified; s__unclassified	0	0	0	0	1	0	0	0	0	0	0	0	0	0	0	2	0	0	0	0	0	0	0	0	0	0	0	0	1	0
OTU_1225	d__Bacteria; p__Planctomycetes; c__Planctomycetia; o__Planctomycetales; f__unclassified; g__unclassified; s__unclassified	9	0	4	5	5	8	0	2	1	5	3	14	7	4	0	1	14	0	0	4	0	3	1	9	0	0	2	2	6	4
OTU_12250	d__Bacteria; p__Proteobacteria; c__unclassified; o__unclassified; f__unclassified; g__unclassified; s__unclassified	0	0	0	0	0	0	0	0	0	0	0	0	0	0	0	0	0	0	0	0	0	0	0	0	0	0	0	0	0	3
OTU_12258	d__Bacteria; p__Actinobacteria; c__unclassified; o__Pseudonocardiales; f__Pseudonocardiaceae; g__unclassified; s__unclassified	0	0	0	0	0	0	0	0	0	0	0	0	0	0	0	0	0	0	0	0	0	0	0	0	0	0	0	0	0	1
OTU_1226	Unassigned	2	1	0	2	0	3	1	0	0	0	2	2	0	2	1	2	0	15	3	1	0	2	2	0	1	1	1	3	1	1
OTU_12260	d__Bacteria; p__Planctomycetes; c__Planctomycetia; o__Planctomycetales; f__unclassified; g__unclassified; s__unclassified	0	0	0	0	0	0	0	0	0	0	0	0	0	0	0	0	0	0	0	0	0	0	0	0	0	0	0	0	0	1
OTU_12261	d__Bacteria; p__unclassified; c__unclassified; o__unclassified; f__unclassified; g__unclassified; s__unclassified	0	0	0	0	0	0	0	0	0	0	0	0	0	0	0	0	0	0	0	0	0	0	0	0	0	0	0	0	0	2
OTU_12262	d__Bacteria; p__Actinobacteria; c__unclassified; o__Streptomycetales; f__Streptomycetaceae; g__unclassified; s__unclassified	0	0	0	0	0	0	0	0	0	0	0	0	0	1	0	0	0	0	0	0	0	0	2	0	0	0	0	0	0	2
OTU_12264	d__Bacteria; p__Actinobacteria; c__unclassified; o__Streptomycetales; f__Streptomycetaceae; g__unclassified; s__unclassified	0	0	0	0	0	0	0	0	0	0	0	0	1	0	0	0	0	0	0	0	0	0	0	0	0	0	0	0	0	1
OTU_12266	Unassigned	0	0	0	0	0	0	0	0	0	0	0	0	0	1	0	0	0	0	0	0	0	0	0	1	0	0	0	0	0	0
OTU_12267	Unassigned	0	0	0	0	0	0	0	0	0	0	0	0	0	0	0	0	0	0	0	0	0	0	0	0	0	0	0	0	0	2
OTU_12268	Unassigned	0	0	1	0	0	0	0	0	0	0	0	0	0	0	0	0	0	0	0	0	0	0	1	0	0	0	0	0	0	3
OTU_12269	d__Bacteria; p__Proteobacteria; c__Gammaproteobacteria; o__Pseudomonadales; f__Pseudomonadaceae; g__unclassified; s__unclassified	0	0	0	0	0	0	0	0	0	0	0	0	0	0	0	0	0	0	0	0	0	0	0	0	0	0	0	0	0	2
OTU_1227	d__Bacteria; p__unclassified; c__unclassified; o__unclassified; f__unclassified; g__unclassified; s__unclassified	0	2	1	0	0	0	1	0	0	0	0	2	0	0	0	0	0	0	0	0	0	0	1	0	2	0	0	0	0	0
OTU_12270	d__Bacteria; p__Actinobacteria; c__unclassified; o__Pseudonocardiales; f__Pseudonocardiaceae; g__unclassified; s__unclassified	0	0	0	0	0	0	0	0	0	0	0	0	0	0	0	0	0	0	0	0	0	0	0	0	0	0	0	0	0	1
OTU_12274	d__Bacteria; p__Proteobacteria; c__Gammaproteobacteria; o__Xanthomonadales; f__Xanthomonadaceae; g__unclassified; s__unclassified	0	0	0	0	0	0	0	0	0	0	0	0	0	0	0	0	0	0	0	0	0	0	0	0	0	0	0	0	0	1
OTU_12276	d__Bacteria; p__Planctomycetes; c__Planctomycetia; o__Planctomycetales; f__unclassified; g__unclassified; s__unclassified	0	0	0	0	0	0	0	0	0	0	0	0	0	0	0	0	0	0	0	0	0	0	0	0	0	0	0	0	0	1
OTU_12278	Unassigned	0	0	0	0	0	0	0	0	0	0	0	0	0	1	0	0	0	0	0	0	0	1	0	0	0	0	0	1	0	0
OTU_12280	Unassigned	0	0	0	0	0	0	0	0	0	0	0	0	0	0	0	0	0	0	0	0	0	0	0	0	0	0	0	0	0	1
OTU_12282	d__Bacteria; p__Proteobacteria; c__Gammaproteobacteria; o__Pseudomonadales; f__Pseudomonadaceae; g__unclassified; s__unclassified	0	0	0	0	0	0	0	0	0	0	0	0	0	0	0	0	0	0	0	0	0	0	0	0	0	0	0	0	0	2
OTU_12283	d__Bacteria; p__Actinobacteria; c__unclassified; o__Streptomycetales; f__Streptomycetaceae; g__unclassified; s__unclassified	0	0	0	0	0	0	0	0	0	0	0	0	0	0	0	0	0	0	0	0	0	0	0	0	0	1	1	0	0	1
OTU_12285	d__Bacteria; p__Actinobacteria; c__unclassified; o__Pseudonocardiales; f__Pseudonocardiaceae; g__unclassified; s__unclassified	0	0	0	0	0	0	0	0	0	0	0	0	0	0	0	0	0	0	0	0	0	0	0	0	0	0	0	0	0	2
OTU_12286	d__Bacteria; p__Planctomycetes; c__Planctomycetia; o__Planctomycetales; f__Gemmataceae; g__unclassified; s__unclassified	0	0	0	0	0	0	0	0	0	0	0	0	0	0	0	0	0	0	0	0	0	0	0	0	0	0	0	0	0	1
OTU_12288	Unassigned	0	0	0	0	0	0	0	0	0	0	0	0	0	0	0	0	0	0	0	0	0	0	0	0	0	0	0	0	0	1
OTU_12289	d__Bacteria; p__unclassified; c__unclassified; o__unclassified; f__unclassified; g__unclassified; s__unclassified	0	0	0	0	0	0	0	0	0	0	0	0	0	0	0	0	0	0	0	0	0	0	0	0	0	0	0	0	0	1
OTU_1229	Unassigned	3	4	1	2	10	2	3	1	3	16	8	6	1	1	3	12	4	8	0	0	0	0	6	0	0	1	13	0	16	13
OTU_12290	Unassigned	0	0	0	0	0	0	0	0	0	0	0	0	0	0	0	0	0	0	0	0	0	0	0	0	0	0	0	0	0	0
OTU_12292	d__Bacteria; p__Planctomycetes; c__Planctomycetia; o__Planctomycetales; f__Isosphaeraceae; g__unclassified; s__unclassified	0	0	0	0	0	0	0	0	0	0	0	0	0	0	0	0	0	0	0	2	0	0	0	0	0	0	0	0	0	4
OTU_12294	d__Bacteria; p__Actinobacteria; c__unclassified; o__Streptomycetales; f__Streptomycetaceae; g__unclassified; s__unclassified	0	0	0	0	0	0	1	0	0	0	0	0	1	0	0	0	0	0	0	0	0	0	0	0	0	0	0	0	0	1
OTU_12296	Unassigned	0	0	0	0	0	0	0	0	0	0	1	0	0	0	0	0	0	0	0	0	0	0	0	0	1	0	0	0	0	2
OTU_12298	Unassigned	0	0	0	0	0	0	0	0	0	0	0	0	0	0	0	0	0	0	0	0	0	0	0	0	0	0	0	0	0	2
OTU_12299	d__Bacteria; p__Actinobacteria; c__Rubrobacteria; o__Rubrobacterales; f__Rubrobacteraceae; g__unclassified; s__unclassified	0	0	0	0	0	0	0	0	0	0	0	0	0	0	0	0	0	0	0	0	0	0	0	0	0	0	0	0	0	2
OTU_123	d__Bacteria; p__Proteobacteria; c__Alphaproteobacteria; o__Caulobacterales; f__Caulobacteraceae; g__unclassified; s__unclassified	15	15	90	35	6	25	12	20	79	14	17	114	96	44	83	10	22	26	39	132	152	80	93	126	112	88	37	86	53	77
OTU_1230	Unassigned	1	0	0	0	1	0	1	2	0	2	0	0	0	0	0	2	2	0	0	0	0	0	0	0	0	1	0	0	0	0
OTU_12300	Unassigned	0	0	0	0	0	0	0	1	0	0	0	0	0	0	0	1	1	0	0	0	0	0	0	0	0	0	0	0	0	1
OTU_12301	d__Bacteria; p__Proteobacteria; c__Gammaproteobacteria; o__Xanthomonadales; f__Xanthomonadaceae; g__unclassified; s__unclassified	0	0	0	0	0	0	0	0	0	0	0	0	0	0	0	0	0	0	0	0	0	0	0	0	0	0	0	0	0	1
OTU_12303	d__Bacteria; p__Actinobacteria; c__Rubrobacteria; o__Rubrobacterales; f__Rubrobacteraceae; g__unclassified; s__unclassified	0	0	0	0	0	0	0	0	0	0	0	0	0	0	0	0	0	0	0	0	0	0	0	0	0	0	0	0	0	2
OTU_12308	d__Bacteria; p__Actinobacteria; c__unclassified; o__Frankiales; f__Frankiaceae; g__unclassified; s__unclassified	0	0	0	0	0	0	0	0	0	0	0	0	0	2	0	0	0	0	2	0	0	0	0	0	0	1	0	0	1	1
OTU_12309	d__Bacteria; p__Planctomycetes; c__Planctomycetia; o__Planctomycetales; f__Isosphaeraceae; g__unclassified; s__unclassified	0	0	0	0	0	0	0	0	0	0	0	0	0	0	0	0	0	0	0	0	0	0	0	0	0	0	0	0	0	1
OTU_1231	Unassigned	0	1	0	0	0	0	0	0	0	3	5	2	13	0	0	2	0	0	0	0	0	0	0	0	0	3	0	0	9	0
OTU_12310	d__Bacteria; p__Proteobacteria; c__Gammaproteobacteria; o__Xanthomonadales; f__Xanthomonadaceae; g__unclassified; s__unclassified	0	0	0	0	0	0	0	0	0	0	0	0	0	0	0	0	0	0	0	0	0	0	0	0	0	0	0	0	0	2
OTU_12313	d__Bacteria; p__Planctomycetes; c__unclassified; o__unclassified; f__unclassified; g__unclassified; s__unclassified	0	0	0	0	0	0	0	0	0	0	0	0	0	0	0	0	0	0	0	0	0	0	0	0	0	0	0	0	0	1
OTU_12314	d__Bacteria; p__Proteobacteria; c__Alphaproteobacteria; o__Sphingomonadales; f__Sphingomonadaceae; g__unclassified; s__unclassified	0	0	0	0	0	0	0	0	0	0	0	0	0	0	0	0	0	0	0	0	0	0	0	0	0	0	0	0	0	1
OTU_12316	Unassigned	0	0	0	0	0	0	0	0	0	0	0	0	0	0	0	0	0	0	0	0	0	0	0	0	0	0	0	0	0	1
OTU_12317	d__Bacteria; p__Actinobacteria; c__unclassified; o__Streptomycetales; f__Streptomycetaceae; g__unclassified; s__unclassified	0	0	0	0	0	0	0	0	0	0	0	0	0	0	0	0	0	0	0	0	0	0	0	0	0	0	0	0	0	1
OTU_12319	d__Bacteria; p__Actinobacteria; c__unclassified; o__unclassified; f__unclassified; g__unclassified; s__unclassified	0	0	0	0	0	0	0	0	0	0	0	0	0	0	0	0	0	0	0	0	0	0	0	0	0	0	1	0	0	2
OTU_1232	Unassigned	0	0	0	0	0	0	0	0	0	0	0	0	0	0	0	0	0	0	0	0	0	10	0	0	0	0	0	0	0	0
OTU_12320	d__Bacteria; p__Planctomycetes; c__Planctomycetia; o__Planctomycetales; f__unclassified; g__unclassified; s__unclassified	0	0	0	0	0	0	0	0	0	0	0	0	0	0	0	0	0	0	0	0	1	0	0	0	0	0	0	0	0	0
OTU_12321	d__Bacteria; p__Proteobacteria; c__Alphaproteobacteria; o__Rhizobiales; f__Bradyrhizobiaceae; g__Bradyrhizobium; s__unclassified	1	0	0	0	0	0	0	0	0	0	0	0	0	0	0	0	0	0	1	1	2	0	0	0	1	0	0	0	0	2
OTU_12323	Unassigned	0	1	0	0	0	0	0	0	0	0	0	0	0	0	0	0	0	0	0	0	0	0	0	0	0	0	0	0	0	3
OTU_12325	Unassigned	0	0	0	0	0	0	0	0	0	0	0	0	1	0	0	0	0	0	0	0	2	0	0	0	0	0	1	0	0	2
OTU_12326	d__Bacteria; p__Proteobacteria; c__Alphaproteobacteria; o__Rhodospirillales; f__Acetobacteraceae; g__unclassified; s__unclassified	0	0	0	0	0	0	0	0	0	0	0	0	0	0	0	0	0	0	0	0	0	0	0	0	0	0	0	0	0	1
OTU_1233	d__Bacteria; p__Planctomycetes; c__Planctomycetia; o__Planctomycetales; f__Isosphaeraceae; g__unclassified; s__unclassified	0	0	1	0	2	9	2	6	2	0	0	5	5	0	0	7	0	2	0	0	0	8	0	2	0	2	0	9	5	0
OTU_12331	d__Bacteria; p__Actinobacteria; c__unclassified; o__Streptomycetales; f__Streptomycetaceae; g__unclassified; s__unclassified	0	0	0	0	0	0	0	0	0	0	0	0	0	0	0	0	0	0	0	0	0	0	0	0	0	0	0	0	0	1
OTU_12332	d__Bacteria; p__Proteobacteria; c__Alphaproteobacteria; o__Caulobacterales; f__Caulobacteraceae; g__unclassified; s__unclassified	0	0	0	0	0	0	0	0	0	0	0	0	0	0	0	0	0	0	0	0	0	0	0	0	0	0	0	0	0	1
OTU_12335	Unassigned	0	0	0	0	0	0	2	0	0	0	0	0	0	0	0	0	0	0	0	0	0	0	0	0	0	0	0	0	0	3
OTU_12336	Unassigned	0	0	0	0	0	0	0	0	0	0	0	0	0	0	0	0	0	0	0	0	0	0	0	0	0	0	0	0	0	2
OTU_12337	d__Bacteria; p__Proteobacteria; c__Gammaproteobacteria; o__Xanthomonadales; f__Xanthomonadaceae; g__unclassified; s__unclassified	0	0	0	0	0	0	0	0	0	0	0	0	0	0	0	0	0	0	0	0	0	0	0	0	0	0	0	0	0	3
OTU_1234	Unassigned	8	3	3	20	2	3	9	11	9	2	6	10	8	24	19	1	5	12	20	15	3	17	9	11	15	3	1	11	5	13
OTU_12340	Unassigned	0	0	0	0	0	0	0	0	0	0	0	0	0	0	0	0	0	0	0	0	0	0	0	0	1	0	0	0	0	2
OTU_12342	d__Bacteria; p__Proteobacteria; c__Gammaproteobacteria; o__Xanthomonadales; f__Xanthomonadaceae; g__unclassified; s__unclassified	0	0	0	0	0	0	0	0	0	0	0	0	0	0	0	0	0	0	0	0	0	0	0	0	0	0	0	0	0	1
OTU_12345	Unassigned	0	0	0	0	0	0	0	0	0	0	0	0	0	0	0	0	0	0	0	0	0	0	0	0	0	0	0	0	0	1
OTU_12346	Unassigned	0	0	0	0	0	0	0	0	0	0	0	0	0	0	0	0	0	0	0	0	0	0	0	0	0	0	0	0	0	1
OTU_12347	d__Bacteria; p__unclassified; c__unclassified; o__unclassified; f__unclassified; g__unclassified; s__unclassified	0	0	0	0	0	0	0	0	0	0	0	0	0	0	0	0	0	0	0	0	0	0	0	0	0	0	0	0	0	1
OTU_1235	d__Bacteria; p__unclassified; c__unclassified; o__unclassified; f__unclassified; g__unclassified; s__unclassified	0	0	1	6	5	1	9	8	2	3	1	0	10	0	1	2	2	3	1	11	3	0	7	3	0	5	5	0	13	3
OTU_12351	d__Bacteria; p__Proteobacteria; c__Alphaproteobacteria; o__Rhizobiales; f__Bradyrhizobiaceae; g__unclassified; s__unclassified	0	0	0	0	0	0	0	0	0	0	0	0	1	1	0	0	0	0	0	0	0	0	0	1	0	1	0	0	2	0
OTU_12352	d__Bacteria; p__Actinobacteria; c__unclassified; o__Streptomycetales; f__Streptomycetaceae; g__unclassified; s__unclassified	0	0	0	0	0	0	0	0	0	0	0	0	0	0	0	0	0	0	0	0	0	0	0	0	0	0	0	0	0	1
OTU_12353	d__Bacteria; p__Proteobacteria; c__Gammaproteobacteria; o__Xanthomonadales; f__Xanthomonadaceae; g__unclassified; s__unclassified	0	0	0	0	0	0	0	0	0	0	0	0	0	0	0	0	0	0	0	0	1	0	0	0	0	0	0	0	0	0
OTU_12354	Unassigned	0	0	0	0	0	0	0	0	0	0	0	0	0	0	0	0	0	0	0	0	0	0	0	2	0	0	0	0	0	1
OTU_12355	d__Bacteria; p__Proteobacteria; c__Gammaproteobacteria; o__Xanthomonadales; f__Xanthomonadaceae; g__unclassified; s__unclassified	0	0	0	0	0	0	0	0	0	0	0	0	0	0	0	0	0	0	0	0	0	0	0	0	0	0	0	0	0	1
OTU_12357	d__Bacteria; p__Proteobacteria; c__Alphaproteobacteria; o__Caulobacterales; f__Caulobacteraceae; g__Phenylobacterium; s__unclassified	0	0	0	0	0	0	0	0	0	0	0	0	0	0	0	0	0	0	0	0	0	0	0	0	0	0	0	0	0	1
OTU_12358	d__Bacteria; p__Proteobacteria; c__Alphaproteobacteria; o__Caulobacterales; f__Caulobacteraceae; g__unclassified; s__unclassified	0	0	0	0	0	0	0	0	0	0	0	0	0	0	0	1	0	1	0	0	0	0	0	0	0	0	0	0	0	1
OTU_12359	d__Bacteria; p__Firmicutes; c__Bacilli; o__Bacillales; f__Bacillaceae; g__unclassified; s__unclassified	0	0	0	0	0	0	0	0	0	0	2	0	0	2	0	0	2	0	0	0	0	0	1	0	3	0	0	0	0	3
OTU_1236	Unassigned	0	1	2	1	0	1	1	0	0	4	1	4	1	2	3	2	0	6	0	7	2	2	1	0	12	3	5	3	3	1
OTU_12361	d__Bacteria; p__Proteobacteria; c__Alphaproteobacteria; o__Caulobacterales; f__Caulobacteraceae; g__unclassified; s__unclassified	0	0	0	0	0	0	0	0	1	0	0	2	0	0	0	0	0	0	0	0	0	0	0	0	0	2	0	0	0	0
OTU_12367	d__Bacteria; p__Actinobacteria; c__unclassified; o__Streptomycetales; f__Streptomycetaceae; g__unclassified; s__unclassified	0	0	0	0	0	0	0	0	0	0	0	0	0	0	0	0	0	0	0	0	0	0	0	0	0	0	0	0	0	2
OTU_12368	Unassigned	0	0	0	0	0	0	0	0	0	0	0	0	0	0	0	0	0	0	0	0	0	0	0	0	0	0	0	0	0	1
OTU_1237	d__Bacteria; p__unclassified; c__unclassified; o__unclassified; f__unclassified; g__unclassified; s__unclassified	0	0	0	0	2	0	0	0	0	0	0	0	0	0	0	0	2	0	0	0	0	0	0	0	8	0	0	0	0	0
OTU_12372	Unassigned	0	0	0	0	0	0	0	2	0	0	0	0	0	0	0	0	0	0	0	0	0	0	0	0	0	0	0	0	0	1
OTU_12374	d__Bacteria; p__Actinobacteria; c__unclassified; o__unclassified; f__unclassified; g__unclassified; s__unclassified	0	0	0	0	0	0	0	0	0	0	0	0	0	0	0	0	0	0	0	0	0	0	0	0	0	0	0	0	1	2
OTU_12380	d__Bacteria; p__Planctomycetes; c__Planctomycetia; o__Planctomycetales; f__Gemmataceae; g__unclassified; s__unclassified	0	0	0	0	0	0	0	0	0	0	0	0	0	0	0	0	1	0	0	0	0	0	0	0	0	0	0	0	0	1
OTU_12382	d__Bacteria; p__unclassified; c__unclassified; o__unclassified; f__unclassified; g__unclassified; s__unclassified	0	0	0	0	0	0	0	0	0	0	1	0	0	0	0	2	0	0	0	0	0	0	0	0	0	0	0	0	0	1
OTU_12383	Unassigned	0	0	0	0	0	0	0	0	0	0	0	0	1	0	0	0	0	0	0	0	0	0	0	0	0	0	0	0	0	1
OTU_12384	Unassigned	0	0	0	0	0	0	0	0	0	0	0	0	0	0	0	0	0	0	0	0	0	0	0	0	0	0	0	0	0	2
OTU_12385	d__Bacteria; p__Planctomycetes; c__Planctomycetia; o__Planctomycetales; f__unclassified; g__unclassified; s__unclassified	0	0	0	0	0	0	0	0	0	0	0	0	0	0	0	0	0	0	0	0	0	0	0	0	0	0	0	0	0	2
OTU_12386	d__Bacteria; p__Proteobacteria; c__unclassified; o__unclassified; f__unclassified; g__unclassified; s__unclassified	0	0	0	1	0	0	0	3	0	0	0	0	0	0	0	0	1	0	0	0	0	0	0	0	0	0	0	0	0	1
OTU_1239	d__Bacteria; p__Planctomycetes; c__Planctomycetia; o__Planctomycetales; f__Isosphaeraceae; g__Paludisphaera; s__unclassified	2	0	6	3	1	2	1	0	1	0	0	4	0	11	8	1	0	1	4	8	1	2	8	10	3	3	7	4	1	3
OTU_12390	Unassigned	0	0	0	0	0	0	0	0	0	0	1	0	0	0	0	0	0	0	0	0	0	0	0	0	0	0	0	0	0	0
OTU_12394	d__Bacteria; p__Planctomycetes; c__Planctomycetia; o__Planctomycetales; f__Isosphaeraceae; g__unclassified; s__unclassified	0	0	0	0	0	0	0	0	0	0	0	0	0	0	0	0	0	0	0	0	0	0	0	0	0	0	0	0	0	1
OTU_12398	Unassigned	0	0	0	0	0	0	0	0	0	0	0	0	0	0	0	0	0	0	0	0	0	0	0	0	0	0	0	0	0	1
OTU_124	Unassigned	1	0	3	0	0	1	0	1	12	1	0	125	5	9	34	0	0	4	3	5	33	8	23	38	47	1	23	62	1	6
OTU_1240	d__Bacteria; p__Proteobacteria; c__Alphaproteobacteria; o__Caulobacterales; f__Caulobacteraceae; g__unclassified; s__unclassified	0	0	1	0	0	0	0	0	0	0	0	0	0	0	2	0	0	0	0	0	0	0	0	0	0	0	0	0	0	0
OTU_12401	d__Bacteria; p__Planctomycetes; c__Planctomycetia; o__Planctomycetales; f__unclassified; g__unclassified; s__unclassified	0	0	0	0	0	0	0	0	0	0	0	0	0	0	0	0	0	0	0	0	0	0	0	0	0	0	0	0	0	1
OTU_12405	d__Bacteria; p__Actinobacteria; c__unclassified; o__Streptomycetales; f__Streptomycetaceae; g__unclassified; s__unclassified	0	0	0	0	0	0	1	0	1	0	0	0	0	0	0	0	0	0	0	0	0	0	0	0	0	0	0	0	0	2
OTU_12406	d__Bacteria; p__Planctomycetes; c__Planctomycetia; o__Planctomycetales; f__Isosphaeraceae; g__Paludisphaera; s__unclassified	0	0	0	0	0	0	0	0	0	0	0	0	0	0	0	0	0	0	0	0	0	0	0	0	0	0	0	0	0	1
OTU_12407	d__Bacteria; p__Proteobacteria; c__Gammaproteobacteria; o__Pseudomonadales; f__Pseudomonadaceae; g__unclassified; s__unclassified	0	0	0	0	0	0	0	0	0	0	0	0	0	0	0	0	0	0	0	0	0	0	0	0	0	0	0	0	0	1
OTU_12409	d__Bacteria; p__Proteobacteria; c__Gammaproteobacteria; o__Pseudomonadales; f__Pseudomonadaceae; g__unclassified; s__unclassified	0	0	0	0	0	0	0	0	0	0	0	0	1	0	0	0	0	0	0	0	0	0	0	1	1	0	0	0	0	2
OTU_1241	Unassigned	0	1	1	5	3	0	5	1	8	3	1	7	7	7	4	0	1	0	3	1	3	12	5	2	4	7	1	7	2	3
OTU_12411	Unassigned	0	0	0	0	0	0	0	0	0	0	0	0	0	0	0	0	0	0	0	0	0	0	0	0	0	0	0	0	0	2
OTU_12412	Unassigned	0	0	0	0	0	0	0	0	2	0	0	0	0	0	0	0	0	0	0	0	0	0	0	0	0	0	0	0	0	1
OTU_12413	d__Bacteria; p__Proteobacteria; c__Gammaproteobacteria; o__Xanthomonadales; f__Xanthomonadaceae; g__unclassified; s__unclassified	0	0	0	0	0	0	0	0	0	0	0	0	0	0	0	0	0	0	1	0	0	0	1	1	0	0	0	0	0	1
OTU_12415	d__Bacteria; p__Proteobacteria; c__Alphaproteobacteria; o__Rhodospirillales; f__Acetobacteraceae; g__unclassified; s__unclassified	0	0	0	0	0	0	0	1	0	0	0	0	0	0	0	0	0	0	0	0	0	0	0	0	0	0	0	0	0	0
OTU_1242	d__Bacteria; p__Actinobacteria; c__unclassified; o__Streptomycetales; f__Streptomycetaceae; g__unclassified; s__unclassified	1	5	3	9	1	12	14	8	1	2	8	4	10	0	0	9	12	0	1	1	0	0	0	2	0	2	7	0	4	19
OTU_12420	d__Bacteria; p__Actinobacteria; c__unclassified; o__Streptomycetales; f__Streptomycetaceae; g__unclassified; s__unclassified	0	0	0	0	0	0	0	0	0	0	0	0	0	0	0	0	0	0	1	0	1	0	0	0	0	0	0	0	0	0
OTU_12422	Unassigned	0	0	0	0	0	0	0	1	1	0	0	0	0	0	0	0	0	0	0	0	0	0	0	0	0	0	0	0	0	0
OTU_12428	d__Bacteria; p__Proteobacteria; c__Alphaproteobacteria; o__Rhizobiales; f__Bradyrhizobiaceae; g__unclassified; s__unclassified	0	0	0	0	0	0	0	0	0	0	0	0	0	0	0	0	0	0	0	0	0	0	0	0	0	0	0	0	0	0
OTU_12429	Unassigned	0	0	0	0	0	0	0	0	0	0	0	0	0	0	0	0	0	0	0	0	0	0	0	0	0	0	0	0	0	0
OTU_1243	d__Bacteria; p__Actinobacteria; c__unclassified; o__Streptomycetales; f__Streptomycetaceae; g__unclassified; s__unclassified	1	1	0	0	5	4	5	11	0	10	3	0	0	0	0	4	1	0	0	0	0	0	0	0	3	2	0	0	3	0
OTU_12436	Unassigned	0	0	0	0	0	0	0	0	0	0	0	0	0	0	0	0	0	0	0	0	0	0	0	0	0	0	0	0	0	0
OTU_1244	d__Bacteria; p__Proteobacteria; c__Alphaproteobacteria; o__Rhodospirillales; f__Acetobacteraceae; g__unclassified; s__unclassified	4	0	0	0	1	2	0	17	1	4	3	0	3	0	1	1	8	0	0	0	0	0	0	0	0	0	3	0	2	0
OTU_12440	d__Bacteria; p__Proteobacteria; c__Gammaproteobacteria; o__Xanthomonadales; f__Xanthomonadaceae; g__unclassified; s__unclassified	0	0	0	0	0	0	0	0	0	0	0	0	0	0	0	0	0	0	1	0	0	0	0	0	0	0	0	0	0	0
OTU_12444	d__Bacteria; p__Actinobacteria; c__unclassified; o__Streptomycetales; f__Streptomycetaceae; g__Streptomyces; s__unclassified	0	0	0	0	0	0	0	0	0	0	0	0	0	0	0	0	0	0	0	0	0	0	0	0	0	0	0	0	0	0
OTU_1245	d__Bacteria; p__Proteobacteria; c__Gammaproteobacteria; o__Xanthomonadales; f__Xanthomonadaceae; g__unclassified; s__unclassified	0	0	0	0	0	0	0	0	0	0	0	0	0	0	1	0	0	11	1	0	1	2	1	0	0	0	0	1	0	1
OTU_12451	d__Bacteria; p__Actinobacteria; c__unclassified; o__Streptomycetales; f__Streptomycetaceae; g__unclassified; s__unclassified	1	0	0	0	0	1	0	2	1	0	0	1	1	0	0	0	1	1	0	0	0	0	1	1	1	0	0	0	0	0
OTU_12452	d__Bacteria; p__Proteobacteria; c__Betaproteobacteria; o__Burkholderiales; f__Comamonadaceae; g__unclassified; s__unclassified	0	0	0	0	0	0	0	0	0	0	0	0	0	0	0	0	0	0	0	0	0	0	0	0	0	0	0	0	0	0
OTU_12457	d__Bacteria; p__unclassified; c__unclassified; o__unclassified; f__unclassified; g__unclassified; s__unclassified	0	0	0	0	0	0	0	0	0	0	0	0	0	0	0	0	0	0	0	0	0	0	0	0	0	0	0	0	0	0
OTU_1246	d__Bacteria; p__unclassified; c__unclassified; o__unclassified; f__unclassified; g__unclassified; s__unclassified	0	0	1	1	0	0	0	0	1	0	3	4	1	14	1	0	3	6	6	4	3	1	2	0	1	0	0	0	0	2
OTU_12467	Unassigned	3	0	0	0	0	0	0	2	4	2	0	4	0	7	5	0	1	5	12	8	4	10	3	1	5	1	2	0	1	5
OTU_1247	Unassigned	1	0	1	2	0	0	0	2	4	0	0	1	21	0	0	1	5	0	0	0	0	0	0	6	0	0	0	0	0	0
OTU_12470	d__Bacteria; p__Planctomycetes; c__Planctomycetia; o__Planctomycetales; f__unclassified; g__unclassified; s__unclassified	0	0	0	0	0	1	0	0	0	0	0	0	0	0	0	0	0	0	0	0	0	0	0	0	0	0	0	0	1	0
OTU_12475	Unassigned	0	0	0	0	0	0	0	0	0	0	0	0	0	0	0	0	0	0	0	0	0	0	0	0	0	0	0	0	0	0
OTU_12478	d__Bacteria; p__Planctomycetes; c__Planctomycetia; o__Planctomycetales; f__unclassified; g__unclassified; s__unclassified	0	0	0	0	0	0	0	0	0	0	0	0	0	0	0	0	0	0	0	0	0	0	0	0	0	0	0	0	1	0
OTU_12479	d__Bacteria; p__Proteobacteria; c__Alphaproteobacteria; o__Rhizobiales; f__Bradyrhizobiaceae; g__Bradyrhizobium; s__unclassified	0	0	0	0	0	0	0	0	0	0	0	0	0	0	0	0	0	0	0	0	0	0	0	0	0	0	0	0	0	0
OTU_12481	d__Bacteria; p__unclassified; c__unclassified; o__unclassified; f__unclassified; g__unclassified; s__unclassified	0	0	0	0	0	0	0	0	1	1	0	0	0	0	0	0	0	0	0	2	0	0	0	2	0	0	0	0	1	0
OTU_12484	d__Bacteria; p__Actinobacteria; c__unclassified; o__Pseudonocardiales; f__Pseudonocardiaceae; g__unclassified; s__unclassified	0	0	1	0	0	0	0	0	0	0	0	0	0	0	0	0	0	0	0	0	0	0	0	0	0	0	0	1	0	0
OTU_12486	d__Bacteria; p__Actinobacteria; c__unclassified; o__Frankiales; f__Frankiaceae; g__unclassified; s__unclassified	0	0	0	0	0	0	0	0	0	0	0	0	0	0	0	0	0	0	0	0	0	0	0	0	0	0	0	0	0	0
OTU_12487	d__Bacteria; p__unclassified; c__unclassified; o__unclassified; f__unclassified; g__unclassified; s__unclassified	0	0	0	1	0	0	0	0	0	0	0	0	0	0	0	0	1	2	0	2	0	0	0	0	0	0	0	0	0	0
OTU_1249	d__Bacteria; p__unclassified; c__unclassified; o__unclassified; f__unclassified; g__unclassified; s__unclassified	1	0	0	0	2	0	0	1	1	1	0	0	0	11	1	0	0	0	0	0	0	1	1	0	0	0	0	0	0	0
OTU_12490	d__Bacteria; p__Proteobacteria; c__Alphaproteobacteria; o__Rhizobiales; f__Bradyrhizobiaceae; g__Bradyrhizobium; s__unclassified	0	0	0	0	0	0	0	0	0	0	0	0	0	0	0	0	0	0	0	0	0	0	0	0	0	0	0	0	0	0
OTU_125	Unassigned	608	714	119	432	501	494	640	494	51	371	262	91	61	11	43	298	240	25	7	195	45	20	106	189	11	328	226	25	196	614
OTU_1250	d__Bacteria; p__Actinobacteria; c__unclassified; o__Streptomycetales; f__Streptomycetaceae; g__unclassified; s__unclassified	1	0	1	0	0	0	1	0	0	0	0	6	0	0	15	0	0	0	0	7	12	3	5	0	0	0	0	0	5	0
OTU_12502	d__Bacteria; p__Proteobacteria; c__Gammaproteobacteria; o__Xanthomonadales; f__Xanthomonadaceae; g__unclassified; s__unclassified	0	0	0	1	0	2	0	0	0	0	0	0	0	0	0	0	0	0	0	0	0	0	0	0	0	0	0	0	0	0
OTU_1251	d__Bacteria; p__Actinobacteria; c__unclassified; o__Streptomycetales; f__Streptomycetaceae; g__unclassified; s__unclassified	2	1	2	1	2	4	2	0	5	7	0	17	13	0	4	0	0	0	2	0	2	5	0	0	0	1	0	19	2	2
OTU_12510	Unassigned	0	0	0	0	0	0	0	0	0	0	0	0	0	0	0	0	0	0	0	0	0	0	0	0	0	0	0	0	0	0
OTU_12511	Unassigned	0	0	0	0	0	0	0	0	0	0	0	0	0	0	0	0	0	0	0	2	0	0	0	0	0	0	0	0	0	0
OTU_1252	d__Bacteria; p__Proteobacteria; c__Gammaproteobacteria; o__Pseudomonadales; f__Pseudomonadaceae; g__unclassified; s__unclassified	0	0	0	0	0	0	0	1	2	0	0	0	0	0	0	0	0	0	0	0	0	0	0	0	0	0	0	0	0	0
OTU_12522	Unassigned	0	0	0	0	0	0	0	0	0	0	0	0	0	0	0	0	0	0	0	0	0	0	1	0	0	0	0	0	1	0
OTU_12524	d__Bacteria; p__Firmicutes; c__Bacilli; o__Bacillales; f__Paenibacillaceae; g__unclassified; s__unclassified	0	0	0	0	0	0	0	0	0	0	0	0	0	0	0	0	0	0	0	0	0	0	0	0	0	0	0	0	0	0
OTU_12529	d__Bacteria; p__Proteobacteria; c__Alphaproteobacteria; o__Rhizobiales; f__Bradyrhizobiaceae; g__Bradyrhizobium; s__unclassified	0	0	0	0	0	0	0	0	0	0	0	0	0	0	0	0	2	0	0	0	0	0	0	0	0	0	0	0	0	0
OTU_1253	d__Bacteria; p__Proteobacteria; c__Gammaproteobacteria; o__Xanthomonadales; f__Xanthomonadaceae; g__unclassified; s__unclassified	0	0	0	0	0	0	0	0	3	0	0	0	0	6	0	0	0	7	11	0	0	2	0	0	5	0	0	0	0	0
OTU_12533	d__Bacteria; p__Proteobacteria; c__Gammaproteobacteria; o__Pseudomonadales; f__Pseudomonadaceae; g__unclassified; s__unclassified	0	0	0	0	0	0	0	0	0	0	0	0	0	0	0	0	0	0	0	0	0	0	0	0	0	1	0	0	0	0
OTU_12539	d__Bacteria; p__Actinobacteria; c__unclassified; o__Streptomycetales; f__Streptomycetaceae; g__unclassified; s__unclassified	0	0	0	0	0	0	0	0	4	0	0	2	0	0	0	0	0	0	0	0	0	1	0	0	0	0	0	0	0	0
OTU_1254	Unassigned	0	0	0	1	4	0	1	0	0	0	0	0	0	11	2	0	0	1	16	0	16	6	2	4	0	0	0	3	2	1
OTU_12544	d__Bacteria; p__Planctomycetes; c__Planctomycetia; o__Planctomycetales; f__unclassified; g__unclassified; s__unclassified	0	0	0	0	0	0	0	0	0	0	0	0	0	0	0	0	0	0	0	0	0	0	0	0	0	0	0	0	0	0
OTU_12545	d__Bacteria; p__Actinobacteria; c__unclassified; o__Streptomycetales; f__Streptomycetaceae; g__unclassified; s__unclassified	0	0	0	0	0	0	0	0	0	0	0	0	0	0	0	0	0	0	0	0	0	0	0	0	0	0	0	0	0	0
OTU_12546	d__Bacteria; p__Proteobacteria; c__Gammaproteobacteria; o__Xanthomonadales; f__Xanthomonadaceae; g__unclassified; s__unclassified	0	0	0	1	0	0	0	0	0	0	0	0	0	0	0	0	0	0	0	0	0	0	1	0	0	0	0	1	0	1
OTU_1255	d__Bacteria; p__Planctomycetes; c__Planctomycetia; o__Planctomycetales; f__Isosphaeraceae; g__unclassified; s__unclassified	11	7	0	0	3	2	10	3	0	0	3	0	3	0	0	0	2	0	0	0	0	0	6	0	0	0	0	0	0	4
OTU_12553	d__Bacteria; p__Proteobacteria; c__Gammaproteobacteria; o__Xanthomonadales; f__Xanthomonadaceae; g__unclassified; s__unclassified	0	0	0	0	0	0	0	0	0	0	0	0	0	0	0	0	0	0	0	0	0	0	0	0	0	0	0	0	0	0
OTU_1256	Unassigned	21	0	1	12	0	0	5	8	1	7	2	0	2	0	0	0	9	0	2	4	1	0	0	0	0	8	6	1	3	0
OTU_12561	d__Bacteria; p__Proteobacteria; c__Alphaproteobacteria; o__Rhizobiales; f__unclassified; g__unclassified; s__unclassified	0	0	0	0	0	0	0	0	0	0	0	0	0	0	0	0	0	0	0	0	0	0	0	0	0	0	0	0	0	0
OTU_12563	d__Bacteria; p__Actinobacteria; c__unclassified; o__Pseudonocardiales; f__Pseudonocardiaceae; g__unclassified; s__unclassified	0	0	1	0	0	0	0	0	0	0	0	0	0	0	0	0	0	0	0	0	1	0	0	0	0	0	0	0	0	0
OTU_12564	d__Bacteria; p__Proteobacteria; c__Alphaproteobacteria; o__Rhodospirillales; f__Rhodospirillaceae; g__unclassified; s__unclassified	0	0	0	0	0	0	0	1	0	0	0	0	0	0	0	0	0	0	0	0	0	0	0	0	0	0	0	0	0	0
OTU_12568	Unassigned	0	0	0	0	0	0	0	0	0	0	0	0	0	0	0	0	0	0	0	0	0	1	0	0	0	0	0	0	0	1
OTU_1257	Unassigned	14	10	1	0	6	2	1	2	5	5	2	1	4	0	0	6	8	0	0	0	0	0	0	2	1	7	0	0	5	3
OTU_12570	Unassigned	0	0	0	0	0	0	0	0	0	0	0	0	0	0	0	0	0	0	0	1	0	0	0	0	0	0	0	0	0	0
OTU_12572	Unassigned	0	0	0	0	0	0	0	0	0	0	0	0	0	0	0	0	0	0	0	0	0	0	0	0	0	0	0	0	0	0
OTU_12573	d__Bacteria; p__Actinobacteria; c__unclassified; o__Pseudonocardiales; f__Pseudonocardiaceae; g__unclassified; s__unclassified	0	0	0	0	0	0	0	0	0	0	0	0	0	0	0	0	0	1	0	0	0	0	0	0	0	0	0	0	0	0
OTU_12577	Unassigned	0	0	0	0	0	0	0	0	0	0	0	0	0	0	0	0	0	0	0	0	0	0	0	0	0	0	0	0	0	0
OTU_1258	d__Bacteria; p__Planctomycetes; c__Planctomycetia; o__Planctomycetales; f__unclassified; g__unclassified; s__unclassified	7	1	2	2	6	3	0	0	0	1	1	0	4	0	0	0	0	0	0	4	0	1	0	1	0	3	0	3	2	3
OTU_12581	d__Bacteria; p__Proteobacteria; c__Gammaproteobacteria; o__Xanthomonadales; f__Xanthomonadaceae; g__unclassified; s__unclassified	0	0	0	0	0	0	0	0	0	0	0	1	0	0	0	0	0	0	2	0	0	0	0	0	0	0	0	0	0	0
OTU_12584	Unassigned	0	0	0	0	0	0	0	0	0	0	0	0	0	0	0	0	0	0	0	0	0	0	0	0	0	0	0	0	0	0
OTU_12587	d__Bacteria; p__Proteobacteria; c__Alphaproteobacteria; o__Rhizobiales; f__Bradyrhizobiaceae; g__unclassified; s__unclassified	0	0	0	0	0	0	0	0	0	0	0	0	0	0	0	0	0	0	0	0	0	0	0	0	0	0	0	0	0	0
OTU_12588	d__Bacteria; p__Actinobacteria; c__unclassified; o__Streptomycetales; f__Streptomycetaceae; g__unclassified; s__unclassified	0	0	0	0	0	0	0	0	0	0	0	0	0	0	0	0	0	0	0	0	0	0	0	0	0	0	0	0	0	0
OTU_1259	d__Bacteria; p__Actinobacteria; c__unclassified; o__Streptomycetales; f__Streptomycetaceae; g__unclassified; s__unclassified	6	18	0	0	8	3	5	5	1	8	16	0	1	0	0	6	7	0	0	2	0	0	1	0	3	1	0	3	7	0
OTU_12590	d__Bacteria; p__Proteobacteria; c__Alphaproteobacteria; o__Rhizobiales; f__Bradyrhizobiaceae; g__unclassified; s__unclassified	0	0	0	0	0	0	0	0	0	0	0	0	0	0	0	0	0	0	0	0	0	0	0	0	0	0	0	0	0	0
OTU_12593	d__Bacteria; p__Proteobacteria; c__unclassified; o__unclassified; f__unclassified; g__unclassified; s__unclassified	0	0	0	0	0	0	0	0	0	0	0	1	0	0	0	0	0	0	1	0	0	0	0	0	0	0	0	0	1	0
OTU_12594	d__Bacteria; p__Proteobacteria; c__Gammaproteobacteria; o__Xanthomonadales; f__Xanthomonadaceae; g__unclassified; s__unclassified	0	1	0	0	0	1	0	0	0	0	0	2	0	0	0	0	1	0	0	0	0	0	0	0	0	0	1	0	0	0
OTU_12599	d__Bacteria; p__Proteobacteria; c__Alphaproteobacteria; o__unclassified; f__unclassified; g__unclassified; s__unclassified	0	0	1	1	1	1	4	0	6	2	3	3	10	5	6	2	2	15	12	5	7	4	7	7	6	7	4	7	1	5
OTU_126	Unassigned	9	0	21	12	1	2	6	8	17	9	3	43	13	65	66	4	2	86	57	17	48	53	57	83	54	14	15	123	8	53
OTU_1260	d__Bacteria; p__Planctomycetes; c__unclassified; o__unclassified; f__unclassified; g__unclassified; s__unclassified	0	0	12	1	1	0	0	2	5	7	3	9	6	2	1	2	4	0	0	4	3	3	1	0	3	0	4	3	0	0
OTU_12602	d__Bacteria; p__Actinobacteria; c__unclassified; o__Streptomycetales; f__Streptomycetaceae; g__unclassified; s__unclassified	0	0	0	0	0	0	0	1	1	0	0	0	0	0	0	0	0	0	0	2	0	0	0	0	0	0	0	0	0	0
OTU_12603	Unassigned	0	0	0	0	0	0	0	0	0	0	0	0	0	0	0	0	0	0	0	0	0	0	0	0	0	0	0	0	0	0
OTU_12607	Unassigned	0	0	0	0	0	0	0	0	1	0	0	0	0	0	0	0	0	0	0	0	0	0	0	0	0	0	0	0	0	0
OTU_12608	Unassigned	0	0	0	0	0	0	0	0	0	0	0	0	0	0	0	0	0	0	0	0	0	0	0	0	0	0	0	0	0	0
OTU_1261	Unassigned	0	0	2	4	0	0	8	0	0	0	0	0	2	3	3	0	0	14	4	11	12	0	0	3	0	0	4	1	0	0
OTU_12613	Unassigned	0	0	0	0	0	0	0	0	0	0	0	0	0	0	0	0	0	0	1	0	0	0	0	0	0	0	0	0	0	0
OTU_12614	Unassigned	0	0	0	0	0	0	0	0	0	1	0	0	0	0	0	0	1	0	0	0	0	0	0	0	0	0	0	0	0	0
OTU_12615	Unassigned	0	0	0	0	0	0	0	0	0	1	0	0	1	0	0	0	0	0	0	0	0	0	0	0	0	0	0	0	0	0
OTU_12616	d__Bacteria; p__Planctomycetes; c__Planctomycetia; o__Planctomycetales; f__Isosphaeraceae; g__unclassified; s__unclassified	0	0	0	0	0	0	0	0	0	1	0	0	0	0	0	0	1	0	0	0	0	0	0	0	0	0	0	0	0	0
OTU_12619	Unassigned	0	0	0	0	0	0	0	0	0	2	0	0	0	0	0	0	0	0	0	0	0	0	0	0	0	0	0	0	0	0
OTU_1262	Unassigned	1	5	1	2	3	4	2	1	0	4	7	5	0	0	2	2	1	2	0	0	1	0	2	7	1	0	1	3	2	3
OTU_12620	Unassigned	0	0	0	0	0	0	0	0	0	2	0	0	0	0	0	0	0	0	0	0	0	0	0	0	0	0	0	0	0	0
OTU_12621	d__Bacteria; p__unclassified; c__unclassified; o__unclassified; f__unclassified; g__unclassified; s__unclassified	0	0	0	0	0	0	0	0	0	1	0	0	0	0	0	0	0	0	0	0	0	0	0	0	0	0	0	0	0	0
OTU_12622	Unassigned	0	0	0	0	0	0	0	0	0	2	0	0	0	0	0	0	0	0	0	0	0	0	0	0	0	0	0	0	0	0
OTU_12623	Unassigned	0	0	0	0	0	0	0	0	0	2	0	0	1	0	0	0	0	0	0	0	0	0	0	0	0	0	0	0	0	0
OTU_12625	Unassigned	0	0	0	0	0	0	0	0	0	2	0	0	0	0	0	0	0	0	0	0	0	0	0	0	0	0	1	0	0	0
OTU_12627	Unassigned	0	0	0	0	0	0	0	0	0	1	0	0	0	0	0	0	0	0	0	0	0	0	0	0	0	0	0	0	0	0
OTU_12628	d__Bacteria; p__Proteobacteria; c__Alphaproteobacteria; o__Caulobacterales; f__Caulobacteraceae; g__Phenylobacterium; s__unclassified	0	2	1	0	0	0	2	1	2	4	2	2	1	0	0	4	0	0	1	0	0	0	2	0	0	1	1	0	3	0
OTU_12629	Unassigned	0	0	0	0	0	0	0	0	0	1	0	0	0	0	0	0	0	0	0	0	0	0	0	0	0	0	0	0	0	0
OTU_1263	d__Bacteria; p__Planctomycetes; c__Planctomycetia; o__Planctomycetales; f__unclassified; g__unclassified; s__unclassified	0	2	0	2	0	0	3	0	1	0	5	4	1	0	0	3	2	1	0	1	0	1	0	0	0	0	0	1	0	0
OTU_12632	Unassigned	0	0	0	0	0	0	0	0	0	1	0	0	0	0	0	0	0	0	0	0	0	0	0	0	0	0	0	0	0	0
OTU_12635	d__Bacteria; p__Proteobacteria; c__Betaproteobacteria; o__Burkholderiales; f__Comamonadaceae; g__unclassified; s__unclassified	0	0	0	0	0	0	0	0	0	2	0	0	0	0	0	0	0	0	0	0	0	0	0	0	0	0	0	0	0	0
OTU_12636	d__Bacteria; p__Actinobacteria; c__Rubrobacteria; o__Rubrobacterales; f__Rubrobacteraceae; g__unclassified; s__unclassified	0	0	0	0	1	0	0	0	0	1	0	0	0	0	0	0	1	1	0	0	0	0	0	0	0	0	1	0	0	0
OTU_12637	d__Bacteria; p__Actinobacteria; c__unclassified; o__Streptomycetales; f__Streptomycetaceae; g__unclassified; s__unclassified	0	0	0	0	0	0	0	0	0	2	0	0	0	0	0	0	0	0	0	0	0	0	0	0	0	0	0	0	0	0
OTU_1264	Unassigned	2	4	0	8	4	0	4	0	2	4	0	0	0	0	0	0	2	0	1	3	1	0	0	1	0	0	2	0	7	5
OTU_12641	d__Bacteria; p__Actinobacteria; c__unclassified; o__Streptomycetales; f__Streptomycetaceae; g__unclassified; s__unclassified	0	0	0	0	0	0	0	0	0	1	0	0	0	0	0	0	0	0	0	0	0	0	0	0	0	0	0	0	0	0
OTU_12642	d__Bacteria; p__Proteobacteria; c__Gammaproteobacteria; o__Xanthomonadales; f__Xanthomonadaceae; g__unclassified; s__unclassified	0	0	0	0	0	0	0	0	0	2	0	0	0	0	0	0	0	0	0	0	0	0	0	0	0	0	0	0	0	0
OTU_12643	Unassigned	0	0	0	0	1	0	0	0	0	1	0	0	0	0	0	0	0	0	0	0	0	0	0	0	0	0	0	0	0	0
OTU_12647	d__Bacteria; p__Actinobacteria; c__unclassified; o__Streptomycetales; f__Streptomycetaceae; g__unclassified; s__unclassified	0	0	0	0	0	0	0	0	0	2	1	0	1	0	0	0	0	0	0	0	0	0	0	0	0	0	0	0	0	2
OTU_12648	Unassigned	0	0	0	0	0	0	1	0	0	1	0	0	1	0	0	0	0	0	0	0	0	1	0	0	0	0	0	0	0	0
OTU_12649	d__Bacteria; p__Actinobacteria; c__unclassified; o__Micromonosporales; f__Micromonosporaceae; g__unclassified; s__unclassified	0	0	0	0	0	0	0	0	0	1	0	0	0	0	0	0	0	0	0	0	0	0	0	0	0	0	0	0	0	0
OTU_1265	Unassigned	17	16	5	25	4	7	7	7	3	2	2	4	3	0	0	5	1	0	0	0	0	2	4	3	1	3	4	0	5	4
OTU_12651	d__Bacteria; p__Actinobacteria; c__unclassified; o__Streptomycetales; f__Streptomycetaceae; g__unclassified; s__unclassified	0	0	0	0	0	0	0	0	0	3	0	0	0	0	0	0	0	0	0	0	0	0	0	0	0	0	0	0	0	0
OTU_12653	d__Bacteria; p__Planctomycetes; c__Planctomycetia; o__Planctomycetales; f__Isosphaeraceae; g__Paludisphaera; s__unclassified	0	0	0	0	0	0	0	0	0	2	0	0	0	0	0	0	0	0	0	0	0	0	0	0	0	0	0	0	1	0
OTU_12656	Unassigned	0	0	0	0	0	0	0	0	0	2	0	0	0	0	0	0	0	0	0	0	0	0	0	0	0	0	0	0	0	0
OTU_12657	Unassigned	0	0	0	0	0	1	0	0	0	2	0	0	0	0	0	0	0	0	0	0	0	0	0	0	0	0	0	0	0	0
OTU_12658	d__Bacteria; p__Proteobacteria; c__Gammaproteobacteria; o__Pseudomonadales; f__Pseudomonadaceae; g__unclassified; s__unclassified	0	0	0	0	0	0	0	0	0	1	0	0	1	0	0	0	0	0	0	0	0	0	0	0	0	0	0	0	0	0
OTU_12659	d__Bacteria; p__Actinobacteria; c__unclassified; o__Streptomycetales; f__Streptomycetaceae; g__unclassified; s__unclassified	0	0	0	0	0	0	0	0	0	4	0	0	0	0	0	0	0	0	0	0	0	0	0	0	0	0	0	0	0	0
OTU_1266	d__Bacteria; p__Planctomycetes; c__Planctomycetia; o__Planctomycetales; f__unclassified; g__unclassified; s__unclassified	7	7	0	0	15	4	1	0	1	3	3	0	1	0	0	1	7	0	0	0	0	0	0	1	0	0	1	0	2	0
OTU_12665	Unassigned	0	0	0	0	0	0	0	1	0	1	1	0	0	0	0	0	0	0	0	0	0	0	0	0	0	0	0	0	0	0
OTU_12666	d__Bacteria; p__Actinobacteria; c__unclassified; o__Streptomycetales; f__Streptomycetaceae; g__unclassified; s__unclassified	0	0	0	0	0	0	0	0	0	2	0	0	0	0	0	0	0	0	0	0	0	0	0	0	0	0	0	0	0	0
OTU_12667	d__Bacteria; p__Actinobacteria; c__unclassified; o__Streptomycetales; f__Streptomycetaceae; g__unclassified; s__unclassified	0	0	0	0	0	0	0	0	0	1	0	0	0	0	0	0	0	0	0	0	0	0	0	0	0	0	0	0	0	0
OTU_12668	Unassigned	0	0	0	0	0	0	0	0	0	1	0	0	0	0	0	0	0	0	0	0	0	0	0	0	0	0	1	0	0	0
OTU_1267	Unassigned	10	2	2	6	11	1	2	10	0	4	2	0	0	0	0	2	7	0	1	5	0	2	4	2	1	4	1	0	0	1
OTU_12670	Unassigned	0	0	0	0	0	0	0	0	0	2	0	0	0	0	0	0	0	0	0	0	0	0	0	0	0	0	0	0	0	0
OTU_12672	Unassigned	0	0	0	0	0	0	0	0	0	3	0	0	0	0	0	0	0	0	0	0	0	0	0	0	0	0	0	0	0	0
OTU_12673	d__Bacteria; p__Planctomycetes; c__Planctomycetia; o__Planctomycetales; f__unclassified; g__unclassified; s__unclassified	0	0	0	0	0	0	0	0	0	1	0	0	0	0	0	0	0	0	0	0	0	0	0	0	0	0	0	0	0	0
OTU_12674	Unassigned	0	0	0	0	0	0	0	0	0	2	0	0	0	0	0	2	0	0	0	0	0	0	0	0	0	0	0	0	1	0
OTU_12677	d__Bacteria; p__Actinobacteria; c__unclassified; o__Streptomycetales; f__Streptomycetaceae; g__unclassified; s__unclassified	0	0	0	0	0	0	0	2	0	0	0	1	0	0	0	0	0	0	0	0	0	1	0	0	0	0	0	0	0	0
OTU_12678	d__Bacteria; p__Proteobacteria; c__Alphaproteobacteria; o__Rhizobiales; f__Bradyrhizobiaceae; g__unclassified; s__unclassified	0	0	0	0	0	0	0	0	0	1	0	0	0	0	0	0	0	0	0	0	0	0	0	0	0	0	0	0	0	0
OTU_1268	Unassigned	0	2	0	0	10	7	5	4	0	5	0	1	0	0	0	7	1	2	0	0	6	1	0	3	0	0	1	0	0	2
OTU_12680	d__Bacteria; p__Actinobacteria; c__unclassified; o__Streptomycetales; f__Streptomycetaceae; g__unclassified; s__unclassified	0	0	0	0	0	0	0	0	0	1	0	0	0	0	0	0	0	0	0	0	0	0	0	0	0	0	0	0	0	0
OTU_12681	Unassigned	0	0	0	0	0	0	0	1	1	1	0	0	0	0	0	0	0	0	0	0	0	0	0	0	0	0	0	0	0	0
OTU_12682	Unassigned	0	0	0	0	0	0	0	1	0	1	0	0	0	0	0	0	0	0	0	0	0	0	0	0	0	0	0	0	0	0
OTU_12684	Unassigned	0	0	0	0	0	0	0	0	0	1	0	0	0	0	0	0	0	0	0	0	0	0	0	0	0	0	0	0	0	0
OTU_12686	d__Bacteria; p__unclassified; c__unclassified; o__unclassified; f__unclassified; g__unclassified; s__unclassified	0	0	0	0	0	0	2	0	0	2	0	0	0	0	0	2	0	0	0	0	0	0	0	0	0	0	0	0	0	0
OTU_12687	d__Bacteria; p__Actinobacteria; c__unclassified; o__Streptomycetales; f__Streptomycetaceae; g__unclassified; s__unclassified	0	0	0	0	0	0	0	0	0	1	0	0	0	0	0	0	0	0	0	0	0	0	0	0	0	0	0	0	0	0
OTU_12688	Unassigned	1	0	0	0	0	0	0	0	0	0	0	0	0	0	0	0	0	0	0	0	0	0	0	0	0	0	0	0	0	0
OTU_1269	Unassigned	0	5	0	0	0	12	1	2	0	1	1	0	9	0	0	5	1	0	0	0	0	0	0	0	0	0	2	1	0	1
OTU_12690	d__Bacteria; p__Actinobacteria; c__unclassified; o__Streptomycetales; f__Streptomycetaceae; g__unclassified; s__unclassified	0	0	0	0	0	0	0	0	0	2	0	0	0	0	0	0	0	0	0	0	0	0	0	0	0	0	0	0	0	0
OTU_12693	d__Bacteria; p__Proteobacteria; c__Alphaproteobacteria; o__Rhizobiales; f__Bradyrhizobiaceae; g__unclassified; s__unclassified	0	0	0	0	0	0	0	0	0	1	0	0	0	0	0	0	0	1	0	0	0	0	0	0	0	0	0	0	0	0
OTU_12694	Unassigned	0	1	0	0	0	0	0	0	0	3	0	0	0	0	0	0	0	0	0	0	0	0	0	0	1	0	0	0	1	0
OTU_12697	d__Bacteria; p__Proteobacteria; c__Gammaproteobacteria; o__unclassified; f__unclassified; g__unclassified; s__unclassified	0	0	0	0	0	0	1	0	0	1	0	0	0	0	0	0	0	0	0	0	0	0	0	0	0	0	0	0	0	0
OTU_12698	Unassigned	5	3	0	0	2	2	2	5	0	8	6	0	1	0	0	1	1	0	0	0	0	0	0	0	0	1	1	0	1	0
OTU_12699	d__Bacteria; p__Actinobacteria; c__unclassified; o__Streptomycetales; f__Streptomycetaceae; g__unclassified; s__unclassified	0	0	0	0	0	0	0	0	0	1	0	0	0	0	0	0	0	0	0	0	0	0	0	0	0	0	0	0	0	0
OTU_127	Unassigned	1	0	2	5	0	0	0	1	3	0	1	3	0	42	7	0	5	37	21	1	4	29	6	8	79	3	3	108	2	2
OTU_1270	d__Bacteria; p__Actinobacteria; c__unclassified; o__Streptomycetales; f__Streptomycetaceae; g__Streptomyces; s__unclassified	0	0	0	0	0	0	0	0	0	0	0	0	0	0	0	0	0	0	0	0	0	0	0	0	0	0	0	0	0	0
OTU_12703	Unassigned	0	0	0	0	0	0	0	0	0	1	0	0	0	0	0	0	0	0	0	0	0	0	0	0	0	0	1	0	0	0
OTU_12704	d__Bacteria; p__Actinobacteria; c__unclassified; o__Streptomycetales; f__Streptomycetaceae; g__unclassified; s__unclassified	0	0	0	0	0	0	0	0	0	2	0	0	0	0	0	0	0	0	0	0	0	0	0	0	0	0	0	0	0	0
OTU_12705	Unassigned	0	0	0	0	0	0	0	0	0	2	0	0	0	0	0	0	0	0	0	0	0	0	0	0	0	0	0	0	0	0
OTU_12707	Unassigned	0	0	0	0	0	0	0	0	1	1	0	0	1	0	0	0	0	0	0	0	0	0	0	0	0	0	0	0	0	0
OTU_12708	d__Bacteria; p__Actinobacteria; c__unclassified; o__Pseudonocardiales; f__Pseudonocardiaceae; g__unclassified; s__unclassified	0	0	0	0	0	0	1	0	0	2	1	0	0	0	0	0	0	0	0	0	0	0	0	0	0	0	0	0	0	0
OTU_1271	d__Bacteria; p__Actinobacteria; c__unclassified; o__Streptomycetales; f__Streptomycetaceae; g__Streptomyces; s__unclassified	0	0	0	0	0	0	0	0	0	0	0	0	0	0	0	0	0	0	0	0	0	0	0	0	0	0	0	0	0	0
OTU_12710	Unassigned	0	0	0	0	0	0	0	0	0	2	0	0	0	0	0	0	0	0	0	0	0	0	0	0	0	0	0	0	0	0
OTU_12713	Unassigned	0	0	0	0	0	0	0	0	0	2	0	0	0	0	0	0	0	0	0	0	0	0	0	0	0	0	0	0	0	0
OTU_12715	Unassigned	0	0	0	0	0	0	0	0	0	3	0	0	0	0	0	1	0	0	0	0	0	0	0	0	0	2	0	0	0	0
OTU_12716	d__Bacteria; p__Actinobacteria; c__unclassified; o__Streptomycetales; f__Streptomycetaceae; g__unclassified; s__unclassified	0	1	0	0	0	0	0	0	0	1	0	0	0	0	0	0	0	0	0	2	0	0	0	0	0	0	0	0	0	0
OTU_12717	d__Bacteria; p__Actinobacteria; c__unclassified; o__Streptomycetales; f__Streptomycetaceae; g__unclassified; s__unclassified	0	0	0	0	0	0	0	0	0	2	0	0	0	0	0	0	0	0	0	0	0	0	0	0	0	0	0	0	0	0
OTU_12718	d__Bacteria; p__Actinobacteria; c__unclassified; o__Streptomycetales; f__Streptomycetaceae; g__unclassified; s__unclassified	0	0	0	0	1	0	0	0	0	1	0	0	0	0	0	0	0	0	0	0	0	0	0	0	0	0	0	0	1	0
OTU_12719	d__Bacteria; p__unclassified; c__unclassified; o__unclassified; f__unclassified; g__unclassified; s__unclassified	0	0	0	0	0	0	0	0	0	1	0	0	0	0	0	0	0	0	0	0	0	0	0	0	0	0	0	0	0	0
OTU_1272	Unassigned	2	2	6	1	6	10	2	8	7	2	1	6	15	6	0	9	9	22	4	21	4	12	1	9	12	2	2	11	2	5
OTU_12720	Unassigned	0	0	0	0	0	0	0	0	0	1	0	0	0	1	0	1	0	0	0	0	0	0	0	0	0	0	1	0	0	1
OTU_12722	d__Bacteria; p__Proteobacteria; c__Alphaproteobacteria; o__Rhizobiales; f__Bradyrhizobiaceae; g__Bradyrhizobium; s__unclassified	0	0	0	0	0	0	0	0	0	1	0	0	0	0	0	0	0	0	0	0	0	0	0	0	0	0	0	0	0	0
OTU_12723	Unassigned	0	0	0	0	0	0	0	0	0	1	0	0	0	0	0	0	0	0	0	0	0	0	0	0	0	0	0	0	0	0
OTU_12724	d__Bacteria; p__Firmicutes; c__Bacilli; o__Bacillales; f__Paenibacillaceae; g__unclassified; s__unclassified	0	0	0	0	0	0	0	0	0	2	0	0	0	0	0	0	0	0	0	0	0	0	0	0	0	0	0	0	0	0
OTU_12726	d__Bacteria; p__Actinobacteria; c__unclassified; o__Streptomycetales; f__Streptomycetaceae; g__unclassified; s__unclassified	0	0	0	0	0	0	0	0	0	1	0	0	0	0	0	0	0	0	0	0	0	0	0	0	0	0	0	0	0	0
OTU_1273	d__Bacteria; p__Proteobacteria; c__Deltaproteobacteria; o__Myxococcales; f__Polyangiaceae; g__unclassified; s__unclassified	0	0	0	3	0	0	5	1	0	0	0	0	0	0	0	3	0	2	7	0	0	0	2	1	1	0	0	11	2	0
OTU_12731	d__Bacteria; p__Proteobacteria; c__Gammaproteobacteria; o__Xanthomonadales; f__Xanthomonadaceae; g__unclassified; s__unclassified	0	0	0	0	0	0	0	0	0	2	0	0	0	0	0	0	0	0	0	0	0	0	0	0	0	0	0	0	0	0
OTU_12736	Unassigned	0	0	0	0	0	0	1	1	0	1	0	0	0	0	0	1	1	0	0	0	0	0	0	0	0	0	0	0	0	0
OTU_12737	Unassigned	0	0	0	0	0	0	0	0	0	1	0	0	0	0	0	0	0	0	0	0	0	0	0	0	0	0	0	0	0	1
OTU_12738	d__Bacteria; p__Proteobacteria; c__Alphaproteobacteria; o__Rhodospirillales; f__Acetobacteraceae; g__unclassified; s__unclassified	0	0	0	0	0	0	0	0	0	1	0	0	0	0	0	0	0	0	0	0	0	0	0	0	0	0	0	0	0	0
OTU_1274	d__Bacteria; p__Planctomycetes; c__Planctomycetia; o__Planctomycetales; f__Gemmataceae; g__unclassified; s__unclassified	3	3	0	0	11	6	5	15	0	10	0	0	0	0	0	11	5	0	0	0	7	0	0	0	0	3	5	3	1	10
OTU_12741	d__Bacteria; p__unclassified; c__unclassified; o__unclassified; f__unclassified; g__unclassified; s__unclassified	0	0	0	0	1	0	1	0	0	2	0	0	0	0	0	0	0	0	0	0	0	0	0	0	0	0	0	0	0	0
OTU_12743	Unassigned	0	0	0	0	0	0	0	0	0	4	0	0	0	0	0	0	2	0	0	0	0	0	0	0	0	0	0	0	0	0
OTU_12744	d__Bacteria; p__Actinobacteria; c__unclassified; o__Streptomycetales; f__Streptomycetaceae; g__unclassified; s__unclassified	0	0	0	0	0	0	0	0	0	2	0	0	0	0	0	0	0	0	0	0	0	0	0	0	0	0	0	0	0	0
OTU_12745	d__Bacteria; p__Planctomycetes; c__Planctomycetia; o__Planctomycetales; f__unclassified; g__unclassified; s__unclassified	0	0	0	0	0	0	0	0	0	1	0	0	0	0	0	0	0	0	0	0	0	0	0	0	0	0	0	0	0	0
OTU_12748	d__Bacteria; p__Planctomycetes; c__Planctomycetia; o__Planctomycetales; f__Isosphaeraceae; g__unclassified; s__unclassified	0	0	0	0	0	0	0	0	0	2	0	0	0	0	0	0	0	0	0	0	0	0	0	0	0	0	0	0	0	0
OTU_1275	d__Bacteria; p__unclassified; c__unclassified; o__unclassified; f__unclassified; g__unclassified; s__unclassified	5	0	0	0	0	0	0	0	0	0	0	0	0	0	0	0	2	0	0	0	0	0	0	0	0	0	0	0	0	7
OTU_12750	d__Bacteria; p__Planctomycetes; c__Planctomycetia; o__Planctomycetales; f__Gemmataceae; g__unclassified; s__unclassified	0	0	0	0	0	0	0	0	0	1	0	0	0	0	0	0	0	0	0	0	0	0	0	0	0	0	0	0	0	0
OTU_12751	d__Bacteria; p__Actinobacteria; c__unclassified; o__Streptomycetales; f__Streptomycetaceae; g__unclassified; s__unclassified	1	0	0	0	0	0	0	2	0	0	0	0	0	0	0	0	0	0	0	0	0	0	0	0	0	0	0	0	0	0
OTU_12752	d__Bacteria; p__Proteobacteria; c__Gammaproteobacteria; o__Xanthomonadales; f__Xanthomonadaceae; g__unclassified; s__unclassified	0	0	0	0	0	0	0	0	0	2	0	0	0	0	0	0	0	0	0	0	0	0	0	0	0	0	0	0	0	1
OTU_12753	d__Bacteria; p__Actinobacteria; c__unclassified; o__Streptomycetales; f__Streptomycetaceae; g__Streptomyces; s__unclassified	0	0	0	0	0	0	0	0	0	2	0	0	0	0	0	0	0	0	0	0	0	0	0	0	0	0	0	0	0	0
OTU_12755	d__Bacteria; p__Proteobacteria; c__Alphaproteobacteria; o__Rhizobiales; f__Bradyrhizobiaceae; g__unclassified; s__unclassified	0	0	0	0	0	0	0	0	0	1	0	0	0	0	0	0	0	0	0	0	0	0	0	0	0	0	0	0	0	0
OTU_12757	d__Bacteria; p__Proteobacteria; c__Gammaproteobacteria; o__Pseudomonadales; f__Pseudomonadaceae; g__unclassified; s__unclassified	0	0	0	0	0	0	0	0	0	1	0	0	0	0	0	0	0	0	0	0	0	0	0	0	0	0	0	0	0	0
OTU_12758	d__Bacteria; p__Proteobacteria; c__Gammaproteobacteria; o__Pseudomonadales; f__Pseudomonadaceae; g__unclassified; s__unclassified	0	0	0	0	0	0	0	0	0	3	0	0	0	0	0	0	0	0	0	0	0	0	0	0	0	0	0	0	0	0
OTU_1276	Unassigned	9	9	0	4	15	6	1	2	2	6	9	0	2	0	0	3	1	0	0	1	0	0	0	9	0	2	4	0	1	19
OTU_12762	Unassigned	0	0	0	0	0	0	0	0	0	2	0	0	0	0	0	0	0	0	0	0	0	0	0	0	0	0	0	0	0	0
OTU_12763	Unassigned	0	0	0	0	0	0	0	0	0	1	0	0	0	0	0	0	0	0	0	0	0	0	0	0	0	0	0	0	0	0
OTU_12764	d__Bacteria; p__Planctomycetes; c__Planctomycetia; o__Planctomycetales; f__Gemmataceae; g__Gemmata; s__unclassified	0	0	0	0	0	0	0	0	0	2	0	0	0	0	0	0	0	0	0	0	0	0	0	0	0	0	0	0	0	0
OTU_12765	Unassigned	0	0	0	0	0	0	0	0	0	2	0	0	0	0	0	0	0	0	0	0	0	0	0	0	0	0	0	0	0	0
OTU_12766	Unassigned	0	0	0	0	0	0	0	0	0	2	1	0	0	0	0	0	0	0	0	0	0	0	0	0	0	0	0	0	0	0
OTU_12767	Unassigned	0	0	0	0	0	1	1	0	0	3	0	0	0	0	0	0	0	0	0	0	0	0	0	0	0	0	0	0	0	0
OTU_12768	d__Bacteria; p__Actinobacteria; c__unclassified; o__Streptomycetales; f__Streptomycetaceae; g__unclassified; s__unclassified	0	1	0	0	0	0	0	0	0	1	0	0	0	0	0	0	0	0	0	0	0	0	0	0	0	0	0	0	1	0
OTU_1277	d__Bacteria; p__Planctomycetes; c__Planctomycetia; o__Planctomycetales; f__Gemmataceae; g__unclassified; s__unclassified	5	2	7	8	1	8	6	2	11	6	8	3	2	10	3	7	4	7	14	3	5	7	3	8	7	6	6	5	2	9
OTU_12771	d__Bacteria; p__Actinobacteria; c__unclassified; o__Streptomycetales; f__Streptomycetaceae; g__unclassified; s__unclassified	0	0	0	0	0	0	0	0	0	1	0	0	0	0	0	0	0	0	0	0	0	0	0	0	0	0	0	0	0	0
OTU_12773	d__Bacteria; p__Actinobacteria; c__unclassified; o__Streptomycetales; f__Streptomycetaceae; g__unclassified; s__unclassified	0	0	0	0	0	0	0	0	0	1	0	0	0	0	0	0	0	0	0	0	0	0	0	0	0	0	0	0	0	0
OTU_12774	d__Bacteria; p__Proteobacteria; c__unclassified; o__unclassified; f__unclassified; g__unclassified; s__unclassified	0	0	0	0	0	0	0	0	0	1	0	0	0	0	0	0	0	0	0	0	0	0	0	0	0	0	0	0	0	0
OTU_12775	Unassigned	0	0	0	0	2	0	0	0	0	2	0	0	1	0	0	0	1	0	0	0	0	0	0	0	0	0	0	0	0	0
OTU_12777	d__Bacteria; p__Planctomycetes; c__unclassified; o__unclassified; f__unclassified; g__unclassified; s__unclassified	0	0	0	0	0	0	0	0	0	1	0	0	0	0	0	0	0	0	0	0	0	0	0	0	0	0	0	0	0	0
OTU_1278	d__Bacteria; p__Planctomycetes; c__unclassified; o__unclassified; f__unclassified; g__unclassified; s__unclassified	1	1	3	2	3	4	3	2	2	2	1	1	1	3	2	4	1	0	3	0	0	3	5	2	0	0	1	5	1	2
OTU_12781	d__Bacteria; p__Planctomycetes; c__unclassified; o__unclassified; f__unclassified; g__unclassified; s__unclassified	0	0	0	0	0	0	0	0	0	2	0	0	0	0	0	0	0	0	0	0	0	0	0	0	0	0	0	0	0	0
OTU_12782	Unassigned	0	1	0	0	0	0	0	0	0	2	4	0	0	0	0	0	0	0	0	0	0	0	0	0	0	0	0	0	0	0
OTU_12783	Unassigned	0	1	0	0	0	0	0	0	0	2	0	0	0	0	0	0	0	0	0	0	0	0	0	0	0	0	0	0	0	0
OTU_12786	d__Bacteria; p__Proteobacteria; c__Alphaproteobacteria; o__Rhodospirillales; f__Acetobacteraceae; g__unclassified; s__unclassified	0	0	0	0	0	0	0	0	0	2	0	0	0	0	0	0	0	0	0	0	0	0	0	0	0	0	0	0	0	0
OTU_12787	d__Bacteria; p__Actinobacteria; c__unclassified; o__Streptomycetales; f__Streptomycetaceae; g__unclassified; s__unclassified	0	0	0	0	0	0	0	0	0	1	1	0	0	0	0	0	0	0	0	0	0	0	0	0	0	0	0	0	0	0
OTU_12789	d__Bacteria; p__Planctomycetes; c__Planctomycetia; o__Planctomycetales; f__unclassified; g__unclassified; s__unclassified	0	0	0	0	0	0	0	0	0	2	0	0	0	0	0	0	0	0	0	0	0	0	0	0	0	0	0	0	0	0
OTU_1279	d__Bacteria; p__Actinobacteria; c__Rubrobacteria; o__Rubrobacterales; f__Rubrobacteraceae; g__unclassified; s__unclassified	0	1	0	0	2	0	0	1	0	15	0	0	0	0	0	1	0	0	0	0	0	0	0	0	0	0	0	0	0	0
OTU_12790	d__Bacteria; p__Actinobacteria; c__unclassified; o__Streptomycetales; f__Streptomycetaceae; g__unclassified; s__unclassified	0	0	0	0	0	0	0	0	0	1	0	0	0	0	0	0	0	0	0	0	0	0	0	0	0	0	0	0	0	0
OTU_12792	d__Bacteria; p__Actinobacteria; c__unclassified; o__Streptomycetales; f__Streptomycetaceae; g__unclassified; s__unclassified	0	0	0	0	0	0	0	0	0	2	0	0	0	0	0	0	0	0	0	0	0	0	0	0	0	0	1	0	0	0
OTU_12793	Unassigned	0	0	0	0	0	0	0	0	0	1	0	0	0	0	0	0	0	0	0	0	0	0	0	1	0	0	0	0	0	0
OTU_12794	d__Bacteria; p__Proteobacteria; c__Gammaproteobacteria; o__Xanthomonadales; f__Xanthomonadaceae; g__unclassified; s__unclassified	0	0	0	0	0	0	0	0	0	1	0	0	0	0	0	0	0	0	0	0	0	0	0	0	0	0	0	0	0	0
OTU_12799	d__Bacteria; p__Planctomycetes; c__Planctomycetia; o__Planctomycetales; f__unclassified; g__unclassified; s__unclassified	0	0	0	0	0	0	0	0	0	0	2	0	0	0	0	0	0	0	0	0	0	0	0	0	0	0	1	0	0	0
OTU_128	d__Bacteria; p__unclassified; c__unclassified; o__unclassified; f__unclassified; g__unclassified; s__unclassified	3	1	1	0	0	1	0	0	3	1	0	13	0	5	3	0	0	19	3	3	1	11	1	10	1	0	0	1	1	12
OTU_1280	d__Bacteria; p__Planctomycetes; c__Planctomycetia; o__Planctomycetales; f__Isosphaeraceae; g__unclassified; s__unclassified	0	1	6	3	0	5	3	1	0	3	11	1	3	0	0	0	2	0	0	2	0	0	2	3	1	2	5	0	0	1
OTU_12801	Unassigned	0	0	0	0	0	0	0	0	0	0	1	0	0	0	0	0	0	0	0	0	0	0	0	0	0	0	0	0	0	0
OTU_12803	Unassigned	0	0	0	0	0	0	0	0	2	0	1	0	0	0	0	0	0	0	0	0	0	0	1	0	0	0	0	0	0	0
OTU_12806	d__Bacteria; p__unclassified; c__unclassified; o__unclassified; f__unclassified; g__unclassified; s__unclassified	0	0	0	0	0	0	0	0	0	0	1	0	0	0	0	0	0	0	0	0	0	0	0	0	0	0	0	0	0	0
OTU_12807	d__Bacteria; p__Actinobacteria; c__unclassified; o__Streptomycetales; f__Streptomycetaceae; g__unclassified; s__unclassified	0	1	0	0	0	0	0	0	0	0	1	0	0	0	0	0	0	0	0	0	0	0	0	0	0	1	0	0	0	0
OTU_1281	Unassigned	2	12	0	0	6	1	0	1	0	3	11	0	3	0	0	6	4	0	0	0	0	0	0	0	0	0	0	0	3	1
OTU_12811	d__Bacteria; p__unclassified; c__unclassified; o__unclassified; f__unclassified; g__unclassified; s__unclassified	0	0	0	0	0	0	0	0	0	0	2	0	0	0	0	0	0	0	0	0	0	0	0	0	0	0	0	0	0	0
OTU_12813	Unassigned	0	0	0	0	0	0	0	1	0	0	1	0	0	0	0	0	0	0	0	0	0	0	0	0	0	0	0	0	0	0
OTU_12815	d__Bacteria; p__Proteobacteria; c__Betaproteobacteria; o__Burkholderiales; f__Comamonadaceae; g__unclassified; s__unclassified	0	0	0	0	0	0	0	0	0	0	1	0	0	0	0	0	0	0	0	0	0	0	0	0	0	0	0	0	0	0
OTU_12816	d__Bacteria; p__unclassified; c__unclassified; o__unclassified; f__unclassified; g__unclassified; s__unclassified	0	0	0	0	0	0	0	0	0	0	1	0	0	0	0	0	0	0	0	0	0	0	0	0	0	0	0	0	0	0
OTU_12817	d__Bacteria; p__Proteobacteria; c__Gammaproteobacteria; o__Pseudomonadales; f__Pseudomonadaceae; g__unclassified; s__unclassified	0	0	0	0	0	0	0	0	0	0	2	0	0	0	0	0	0	0	0	0	0	0	0	0	0	0	0	0	0	0
OTU_12818	d__Bacteria; p__Actinobacteria; c__unclassified; o__Streptomycetales; f__Streptomycetaceae; g__unclassified; s__unclassified	0	0	0	0	0	0	0	0	0	0	1	0	0	0	0	0	0	0	0	0	0	0	0	0	0	0	0	0	0	0
OTU_1282	d__Bacteria; p__Actinobacteria; c__unclassified; o__Pseudonocardiales; f__Pseudonocardiaceae; g__unclassified; s__unclassified	0	0	7	6	2	5	1	5	8	0	1	12	6	3	1	1	1	4	3	0	0	1	0	6	1	0	0	9	6	4
OTU_12821	Unassigned	0	0	0	0	0	0	0	0	0	0	2	0	0	0	0	0	0	0	0	0	0	0	0	0	0	0	0	0	0	0
OTU_12824	d__Bacteria; p__Actinobacteria; c__unclassified; o__Streptomycetales; f__Streptomycetaceae; g__unclassified; s__unclassified	0	0	0	0	0	0	0	0	0	0	1	0	0	0	0	0	0	0	0	0	0	0	0	0	0	0	0	0	0	0
OTU_12826	d__Bacteria; p__Proteobacteria; c__Alphaproteobacteria; o__Rhizobiales; f__Bradyrhizobiaceae; g__unclassified; s__unclassified	1	0	0	0	0	0	0	0	0	0	2	0	0	0	0	0	0	0	0	0	0	0	0	0	0	0	0	0	0	0
OTU_12828	Unassigned	0	0	0	0	0	0	0	0	0	0	2	0	0	0	0	0	0	0	0	0	0	0	0	0	0	0	0	0	0	0
OTU_12829	Unassigned	0	0	0	0	0	0	0	1	0	0	1	0	0	0	0	0	0	0	0	0	0	0	0	0	0	0	0	0	0	0
OTU_1283	Unassigned	3	0	0	0	0	0	0	0	1	1	4	0	1	2	4	0	1	2	2	0	3	12	2	2	2	0	0	12	0	1
OTU_12830	Unassigned	0	0	0	0	0	0	0	0	0	1	1	0	0	0	0	0	0	0	0	0	0	0	0	0	0	0	0	0	0	0
OTU_12831	d__Bacteria; p__Actinobacteria; c__unclassified; o__Streptomycetales; f__Streptomycetaceae; g__unclassified; s__unclassified	0	0	0	0	0	0	0	0	0	0	1	0	0	0	0	0	0	0	0	0	0	0	0	0	0	0	0	0	0	0
OTU_12838	d__Bacteria; p__Proteobacteria; c__Alphaproteobacteria; o__Rhizobiales; f__Bradyrhizobiaceae; g__unclassified; s__unclassified	0	0	0	0	0	0	0	0	1	0	1	0	0	0	0	0	0	0	0	0	0	0	0	0	0	0	0	0	0	0
OTU_12839	d__Bacteria; p__Actinobacteria; c__unclassified; o__Streptomycetales; f__Streptomycetaceae; g__Streptomyces; s__unclassified	0	0	0	0	0	0	0	0	0	0	2	0	0	0	0	0	0	0	0	0	0	0	0	0	0	0	0	0	0	0
OTU_1284	d__Bacteria; p__Planctomycetes; c__Planctomycetia; o__Planctomycetales; f__unclassified; g__unclassified; s__unclassified	5	0	1	0	2	3	1	8	8	0	0	1	3	2	2	0	3	3	4	2	1	1	6	4	1	6	0	2	1	9
OTU_12841	d__Bacteria; p__unclassified; c__unclassified; o__unclassified; f__unclassified; g__unclassified; s__unclassified	0	0	0	0	0	0	0	0	0	0	0	1	0	0	0	0	0	0	0	0	0	0	0	0	0	0	0	0	0	0
OTU_12843	Unassigned	0	0	0	0	0	0	0	0	0	0	1	0	0	0	0	0	1	0	0	0	0	0	0	0	0	0	0	0	0	0
OTU_12844	d__Bacteria; p__Proteobacteria; c__Alphaproteobacteria; o__Rhizobiales; f__Bradyrhizobiaceae; g__unclassified; s__unclassified	0	0	0	0	0	0	0	0	0	0	2	0	0	0	0	0	0	0	0	0	0	0	0	0	0	0	0	0	0	0
OTU_12846	Unassigned	0	0	0	0	0	0	0	0	0	0	1	0	0	0	0	0	0	0	0	0	0	0	0	0	0	1	0	0	0	0
OTU_12854	d__Bacteria; p__Proteobacteria; c__Gammaproteobacteria; o__Pseudomonadales; f__Pseudomonadaceae; g__unclassified; s__unclassified	0	0	0	0	0	0	0	0	0	0	1	0	0	0	0	1	0	0	0	0	0	0	0	0	0	0	0	0	0	0
OTU_12855	d__Bacteria; p__unclassified; c__unclassified; o__unclassified; f__unclassified; g__unclassified; s__unclassified	2	0	0	0	0	0	0	0	0	0	1	0	0	0	0	1	0	0	0	0	0	0	0	0	0	0	0	0	0	0
OTU_12856	Unassigned	0	0	0	0	0	0	1	1	0	0	2	0	0	0	0	1	0	0	0	0	0	0	0	1	0	0	0	0	0	0
OTU_12864	d__Bacteria; p__Proteobacteria; c__Alphaproteobacteria; o__unclassified; f__unclassified; g__unclassified; s__unclassified	0	0	0	0	0	0	0	0	0	0	1	0	1	0	0	0	0	0	0	0	0	0	0	0	0	0	0	0	0	0
OTU_12865	d__Bacteria; p__Proteobacteria; c__Betaproteobacteria; o__Burkholderiales; f__Comamonadaceae; g__unclassified; s__unclassified	0	0	0	0	0	0	0	0	0	0	0	0	1	0	0	1	0	0	0	0	0	0	0	0	0	0	0	0	0	0
OTU_12866	d__Bacteria; p__Proteobacteria; c__Gammaproteobacteria; o__Xanthomonadales; f__Xanthomonadaceae; g__unclassified; s__unclassified	0	1	0	0	0	0	0	0	0	0	1	0	2	0	0	0	0	0	0	0	0	0	0	0	0	0	0	0	0	2
OTU_12868	d__Bacteria; p__Proteobacteria; c__Betaproteobacteria; o__Burkholderiales; f__Comamonadaceae; g__unclassified; s__unclassified	0	0	0	0	0	0	0	0	0	0	0	0	0	1	0	0	0	0	0	0	0	0	0	0	2	0	0	0	0	0
OTU_1287	d__Bacteria; p__Proteobacteria; c__Alphaproteobacteria; o__Rhizobiales; f__Bradyrhizobiaceae; g__unclassified; s__unclassified	0	0	0	2	0	0	2	0	1	1	0	2	0	0	0	0	0	0	0	0	0	1	0	2	1	1	2	0	0	0
OTU_12871	d__Bacteria; p__Planctomycetes; c__Planctomycetia; o__Planctomycetales; f__unclassified; g__unclassified; s__unclassified	0	0	1	0	0	0	0	1	0	1	2	0	1	0	0	0	0	0	0	0	0	0	0	0	0	0	0	0	0	0
OTU_12872	d__Bacteria; p__unclassified; c__unclassified; o__unclassified; f__unclassified; g__unclassified; s__unclassified	0	0	0	0	0	0	0	1	0	0	2	0	0	0	0	0	0	0	0	0	0	0	0	0	0	0	0	0	0	0
OTU_12875	d__Bacteria; p__Planctomycetes; c__Planctomycetia; o__Planctomycetales; f__unclassified; g__unclassified; s__unclassified	0	0	0	0	1	0	0	0	0	0	1	0	0	0	0	0	0	0	0	0	0	0	0	0	0	0	0	0	0	0
OTU_12878	d__Bacteria; p__Actinobacteria; c__unclassified; o__Streptomycetales; f__Streptomycetaceae; g__unclassified; s__unclassified	0	0	0	0	0	0	0	0	0	0	2	0	0	0	0	0	0	0	0	0	0	0	0	0	0	0	0	0	0	0
OTU_1288	d__Bacteria; p__Actinobacteria; c__unclassified; o__Streptomycetales; f__Streptomycetaceae; g__unclassified; s__unclassified	3	8	3	0	2	0	1	2	0	5	12	3	3	0	0	0	1	0	2	0	0	0	0	1	1	3	5	2	4	0
OTU_12881	d__Bacteria; p__Planctomycetes; c__Planctomycetia; o__Planctomycetales; f__Isosphaeraceae; g__unclassified; s__unclassified	0	0	0	0	0	0	0	0	0	0	1	0	0	0	0	0	0	0	0	0	0	0	0	0	0	0	0	0	0	0
OTU_12884	d__Bacteria; p__Proteobacteria; c__Betaproteobacteria; o__Burkholderiales; f__Comamonadaceae; g__unclassified; s__unclassified	0	0	0	0	0	0	0	0	0	1	0	0	0	0	0	0	0	0	0	0	0	0	0	0	0	0	0	0	1	0
OTU_12885	Unassigned	0	0	0	0	0	0	0	0	0	0	1	0	0	0	0	0	0	0	0	0	0	0	0	0	0	0	0	0	0	0
OTU_12886	Unassigned	0	0	0	0	0	0	0	0	0	0	0	0	0	0	0	0	0	0	0	0	0	0	0	0	0	0	0	0	0	0
OTU_1289	Unassigned	0	0	0	0	0	0	2	0	0	0	0	0	0	1	0	7	0	0	0	0	0	0	0	0	0	0	0	0	0	0
OTU_12891	d__Bacteria; p__Actinobacteria; c__unclassified; o__Streptomycetales; f__Streptomycetaceae; g__unclassified; s__unclassified	0	0	0	0	0	0	0	0	0	0	1	0	0	0	0	0	0	0	0	0	0	0	0	0	0	0	0	0	0	0
OTU_12892	Unassigned	0	0	0	0	0	0	0	0	0	0	1	0	0	0	0	0	0	0	0	0	0	0	0	0	0	0	0	0	0	0
OTU_12894	Unassigned	0	0	0	0	0	0	0	1	0	0	1	0	0	0	0	0	0	0	0	0	0	0	0	0	0	0	0	0	0	0
OTU_12895	d__Bacteria; p__unclassified; c__unclassified; o__unclassified; f__unclassified; g__unclassified; s__unclassified	0	0	0	0	0	0	0	0	0	0	0	0	0	0	0	0	0	0	1	0	0	0	0	0	0	0	0	0	0	0
OTU_12896	d__Bacteria; p__unclassified; c__unclassified; o__unclassified; f__unclassified; g__unclassified; s__unclassified	0	0	0	0	0	0	0	0	0	0	2	0	0	0	0	0	0	0	0	0	0	0	0	0	0	0	0	0	0	0
OTU_12898	d__Bacteria; p__Planctomycetes; c__Planctomycetia; o__Planctomycetales; f__unclassified; g__unclassified; s__unclassified	0	0	0	0	0	0	0	0	0	0	1	0	0	0	0	0	0	0	0	0	0	0	0	0	0	0	0	0	0	0
OTU_129	Unassigned	17	3	42	53	9	17	25	5	16	38	7	34	7	65	55	14	16	111	64	16	75	113	19	47	57	3	15	70	7	51
OTU_1290	Unassigned	1	2	0	0	4	0	0	0	0	0	1	1	5	0	0	8	2	0	0	0	1	0	1	6	8	0	0	0	0	0
OTU_12901	Unassigned	1	0	0	0	0	0	0	0	0	0	1	0	0	0	0	0	0	0	0	0	0	0	0	0	0	0	0	0	0	0
OTU_12903	d__Bacteria; p__Proteobacteria; c__Gammaproteobacteria; o__Xanthomonadales; f__Xanthomonadaceae; g__unclassified; s__unclassified	0	1	0	0	0	0	0	0	0	0	2	0	0	0	0	0	0	0	0	0	0	0	0	0	0	0	0	0	0	0
OTU_12905	Unassigned	0	0	0	0	0	0	0	0	0	0	2	0	0	0	0	0	0	0	0	0	0	1	0	1	0	0	0	0	0	0
OTU_12906	d__Bacteria; p__unclassified; c__unclassified; o__unclassified; f__unclassified; g__unclassified; s__unclassified	0	0	0	0	0	0	0	0	0	0	1	0	0	0	0	0	0	0	0	0	0	0	0	0	0	0	0	0	0	0
OTU_1291	d__Bacteria; p__Actinobacteria; c__unclassified; o__Streptomycetales; f__Streptomycetaceae; g__unclassified; s__unclassified	0	0	0	0	1	0	0	3	0	0	6	6	0	3	0	6	2	7	0	0	0	0	0	2	7	4	1	6	6	0
OTU_12911	Unassigned	0	0	0	0	1	0	0	0	0	0	1	0	0	0	0	0	0	0	0	0	0	0	0	0	0	0	0	0	0	0
OTU_1292	Unassigned	0	0	0	0	0	0	0	0	0	0	0	0	0	0	0	1	0	0	0	0	0	0	0	0	0	0	0	0	0	0
OTU_12920	d__Bacteria; p__Actinobacteria; c__unclassified; o__Streptomycetales; f__Streptomycetaceae; g__unclassified; s__unclassified	0	0	0	0	0	1	0	1	0	0	1	0	0	0	0	0	0	0	0	0	0	1	0	0	0	0	0	0	0	0
OTU_12923	Unassigned	0	0	0	0	0	0	0	0	0	0	1	0	0	0	0	0	0	0	0	0	0	1	0	0	0	0	0	0	2	0
OTU_12924	d__Bacteria; p__Proteobacteria; c__unclassified; o__unclassified; f__unclassified; g__unclassified; s__unclassified	0	0	0	0	0	0	0	0	0	0	2	0	0	0	0	0	0	0	0	0	0	0	0	0	0	0	0	0	0	0
OTU_12925	d__Bacteria; p__Proteobacteria; c__Gammaproteobacteria; o__Pseudomonadales; f__Pseudomonadaceae; g__unclassified; s__unclassified	0	0	0	0	0	0	0	0	0	0	1	0	0	0	0	0	0	0	0	0	0	0	0	0	0	0	0	0	0	0
OTU_12929	Unassigned	0	0	0	0	0	0	0	0	0	0	1	0	0	0	0	0	0	0	0	0	0	0	0	0	0	0	0	0	0	0
OTU_1293	d__Bacteria; p__Proteobacteria; c__unclassified; o__unclassified; f__unclassified; g__unclassified; s__unclassified	1	0	11	2	0	4	10	0	2	0	0	1	14	3	10	1	1	0	12	5	9	20	6	3	5	6	2	6	4	13
OTU_12931	Unassigned	0	0	0	0	1	0	0	0	0	0	1	0	0	0	0	1	0	0	0	0	0	0	0	0	0	0	0	0	0	0
OTU_12933	d__Bacteria; p__Actinobacteria; c__unclassified; o__Streptomycetales; f__Streptomycetaceae; g__unclassified; s__unclassified	0	0	0	0	0	0	0	0	0	0	1	0	0	0	0	0	0	0	0	0	0	0	0	0	0	0	0	0	0	0
OTU_12935	Unassigned	0	0	0	0	0	0	0	0	0	0	1	0	0	0	0	0	0	0	0	0	0	0	0	0	0	0	0	0	0	0
OTU_12938	Unassigned	0	0	0	0	0	0	0	0	0	1	2	0	0	0	0	0	0	0	0	0	0	0	0	0	0	0	0	0	0	0
OTU_1294	Unassigned	0	0	0	0	0	0	0	0	0	0	0	0	0	0	0	0	0	0	0	0	0	0	0	0	0	0	0	0	0	0
OTU_12940	d__Bacteria; p__unclassified; c__unclassified; o__unclassified; f__unclassified; g__unclassified; s__unclassified	0	0	0	0	0	0	0	0	0	0	1	0	0	0	0	0	0	0	0	0	0	0	0	0	0	0	0	0	0	0
OTU_12941	d__Bacteria; p__Actinobacteria; c__unclassified; o__Streptomycetales; f__Streptomycetaceae; g__unclassified; s__unclassified	0	0	0	0	0	0	0	0	0	0	1	0	0	0	0	0	0	0	0	0	0	0	0	0	0	0	0	0	0	0
OTU_12945	d__Bacteria; p__Proteobacteria; c__Gammaproteobacteria; o__Xanthomonadales; f__Xanthomonadaceae; g__unclassified; s__unclassified	0	0	0	0	0	0	0	0	0	0	1	0	0	0	0	0	0	0	0	0	0	0	0	0	0	0	0	0	0	0
OTU_12946	d__Bacteria; p__Proteobacteria; c__Gammaproteobacteria; o__Pseudomonadales; f__Pseudomonadaceae; g__unclassified; s__unclassified	0	0	0	0	0	0	0	0	0	0	1	0	0	0	0	0	0	0	0	0	0	0	0	0	0	0	0	0	0	0
OTU_12947	d__Bacteria; p__Planctomycetes; c__Planctomycetia; o__Planctomycetales; f__unclassified; g__unclassified; s__unclassified	0	0	0	0	0	0	0	1	0	0	1	0	0	0	0	0	2	0	0	0	0	0	0	0	0	0	0	0	0	0
OTU_12948	Unassigned	0	0	0	0	0	1	0	0	0	0	2	1	0	0	0	0	0	0	0	0	0	0	0	0	0	1	0	0	0	0
OTU_1295	d__Bacteria; p__Planctomycetes; c__Planctomycetia; o__Planctomycetales; f__unclassified; g__unclassified; s__unclassified	5	5	6	11	0	0	1	5	1	1	1	0	4	3	4	2	2	1	3	2	0	3	5	0	1	0	2	0	0	0
OTU_12950	Unassigned	0	0	0	0	0	0	0	0	0	0	1	0	0	0	0	0	0	0	0	0	0	0	0	0	0	0	0	0	0	0
OTU_12951	d__Bacteria; p__Planctomycetes; c__Planctomycetia; o__Planctomycetales; f__Isosphaeraceae; g__unclassified; s__unclassified	0	0	0	0	1	0	0	0	0	0	0	0	0	0	0	0	1	0	0	0	0	0	0	0	0	1	0	0	0	0
OTU_12952	d__Bacteria; p__Proteobacteria; c__Gammaproteobacteria; o__Pseudomonadales; f__Pseudomonadaceae; g__unclassified; s__unclassified	0	0	0	0	0	0	0	1	1	0	0	0	0	0	0	0	0	0	0	0	0	0	0	0	0	0	0	0	0	0
OTU_12953	d__Bacteria; p__Planctomycetes; c__Planctomycetia; o__Planctomycetales; f__Isosphaeraceae; g__unclassified; s__unclassified	0	0	0	0	0	0	0	0	0	0	1	0	0	0	0	0	0	0	0	0	0	0	0	0	0	0	0	0	0	0
OTU_12954	d__Bacteria; p__Actinobacteria; c__unclassified; o__Streptomycetales; f__Streptomycetaceae; g__unclassified; s__unclassified	0	0	0	0	0	0	0	0	0	0	3	0	1	0	0	0	0	0	0	0	0	0	0	0	0	0	0	0	0	0
OTU_12959	Unassigned	0	0	0	0	0	0	0	0	0	0	0	0	0	0	0	0	0	0	0	0	0	0	0	0	0	0	0	0	0	0
OTU_1296	d__Bacteria; p__Proteobacteria; c__Gammaproteobacteria; o__Pseudomonadales; f__Pseudomonadaceae; g__unclassified; s__unclassified	1	0	0	0	0	0	0	0	0	0	0	5	5	1	0	0	0	0	0	0	0	0	0	0	0	0	0	0	0	0
OTU_12960	d__Bacteria; p__Firmicutes; c__Bacilli; o__Bacillales; f__Paenibacillaceae; g__unclassified; s__unclassified	0	0	0	0	0	0	0	0	0	0	2	0	0	0	0	0	0	0	0	0	0	0	0	0	0	0	0	0	0	0
OTU_12964	Unassigned	0	0	0	0	0	0	0	0	0	0	1	0	0	0	0	0	0	0	0	0	0	0	0	0	0	0	0	0	0	0
OTU_12965	d__Bacteria; p__Actinobacteria; c__unclassified; o__Streptomycetales; f__Streptomycetaceae; g__unclassified; s__unclassified	0	0	0	0	0	0	0	0	0	0	1	0	0	0	0	0	0	0	0	0	0	0	0	0	0	0	0	0	0	0
OTU_12966	d__Bacteria; p__Planctomycetes; c__Planctomycetia; o__Planctomycetales; f__unclassified; g__unclassified; s__unclassified	0	0	0	0	0	0	0	0	0	0	3	0	0	0	0	0	0	0	0	0	0	0	0	0	0	0	0	0	0	0
OTU_12969	d__Bacteria; p__Proteobacteria; c__Alphaproteobacteria; o__Rhizobiales; f__Bradyrhizobiaceae; g__unclassified; s__unclassified	0	0	0	0	0	0	0	0	0	0	2	0	0	0	0	0	0	0	0	0	0	0	0	0	0	0	0	0	0	0
OTU_1297	d__Bacteria; p__Planctomycetes; c__Planctomycetia; o__Planctomycetales; f__unclassified; g__unclassified; s__unclassified	0	0	0	0	0	2	0	1	1	0	7	2	0	0	0	4	0	1	0	0	0	1	0	0	0	2	0	0	0	3
OTU_12970	d__Bacteria; p__Actinobacteria; c__unclassified; o__Streptomycetales; f__Streptomycetaceae; g__unclassified; s__unclassified	0	0	0	0	0	0	0	0	0	0	1	0	0	0	0	0	0	0	0	0	0	0	0	0	0	0	0	0	0	0
OTU_12973	d__Bacteria; p__Actinobacteria; c__unclassified; o__Streptomycetales; f__Streptomycetaceae; g__unclassified; s__unclassified	0	1	0	0	0	0	0	0	0	0	1	0	0	0	0	0	0	0	0	0	0	0	0	0	0	0	0	0	0	0
OTU_12975	Unassigned	0	0	0	0	0	1	0	0	0	0	1	0	0	0	0	0	0	0	0	0	0	0	0	0	0	0	0	0	0	0
OTU_12976	Unassigned	0	0	0	0	0	0	0	0	0	0	1	0	0	0	0	0	0	0	0	0	0	0	0	0	0	0	0	0	0	0
OTU_12977	d__Bacteria; p__unclassified; c__unclassified; o__unclassified; f__unclassified; g__unclassified; s__unclassified	0	0	0	0	0	0	0	0	0	0	2	0	0	0	0	0	0	0	0	1	0	0	0	0	0	0	0	0	0	0
OTU_12979	d__Bacteria; p__Planctomycetes; c__Planctomycetia; o__Planctomycetales; f__Isosphaeraceae; g__unclassified; s__unclassified	0	0	0	0	0	0	0	0	0	0	2	0	0	0	0	0	0	0	0	0	0	0	0	0	0	0	1	0	0	0
OTU_1298	d__Bacteria; p__Proteobacteria; c__Gammaproteobacteria; o__Xanthomonadales; f__Xanthomonadaceae; g__unclassified; s__unclassified	0	0	0	0	0	4	1	1	0	0	6	0	0	0	0	0	0	0	0	0	0	0	0	0	0	0	0	7	0	0
OTU_12983	Unassigned	0	0	0	0	0	0	0	0	0	0	1	0	0	0	0	0	0	0	0	0	0	0	0	0	0	0	0	0	0	0
OTU_12987	Unassigned	0	0	0	0	0	0	0	0	0	0	0	0	0	0	0	1	0	0	0	0	0	0	0	0	0	0	0	0	0	0
OTU_1299	d__Bacteria; p__Planctomycetes; c__Planctomycetia; o__Planctomycetales; f__unclassified; g__unclassified; s__unclassified	2	2	0	4	0	0	2	2	6	1	2	2	3	1	3	0	3	4	4	0	3	8	8	0	0	4	4	0	7	4
OTU_12990	Unassigned	0	0	0	0	0	0	0	0	0	0	2	0	0	0	0	0	0	0	0	0	0	0	0	0	0	0	0	0	0	0
OTU_12993	d__Bacteria; p__Actinobacteria; c__unclassified; o__unclassified; f__unclassified; g__unclassified; s__unclassified	0	0	0	0	0	0	0	0	0	0	1	0	0	0	0	0	0	0	0	0	0	0	0	0	0	0	0	0	1	0
OTU_12996	d__Bacteria; p__Planctomycetes; c__Planctomycetia; o__Planctomycetales; f__Isosphaeraceae; g__unclassified; s__unclassified	0	0	0	0	0	0	0	0	0	0	1	0	0	0	0	0	0	0	0	0	0	0	0	0	0	0	0	0	0	0
OTU_13	d__Bacteria; p__unclassified; c__unclassified; o__unclassified; f__unclassified; g__unclassified; s__unclassified	467	183	675	667	97	394	292	308	345	288	244	462	378	69	4	361	298	22	14	360	74	62	82	174	55	825	384	268	706	134
OTU_130	d__Bacteria; p__Proteobacteria; c__Gammaproteobacteria; o__Xanthomonadales; f__Xanthomonadaceae; g__unclassified; s__unclassified	88	45	31	60	103	21	73	133	20	106	96	24	41	3	0	177	73	7	2	21	1	3	11	10	1	72	26	11	116	15
OTU_1300	Unassigned	1	2	2	1	0	0	4	2	8	6	3	0	5	0	2	4	7	1	6	0	2	7	3	2	1	6	7	4	0	7
OTU_1301	d__Bacteria; p__Planctomycetes; c__Planctomycetia; o__Planctomycetales; f__Isosphaeraceae; g__unclassified; s__unclassified	6	2	6	8	2	10	2	1	8	2	7	2	6	5	0	2	9	0	3	0	0	6	6	17	3	6	12	8	9	14
OTU_13010	Unassigned	0	0	0	0	0	0	2	0	0	0	1	0	0	0	0	0	0	0	0	0	0	0	0	0	0	0	0	0	1	0
OTU_13011	d__Bacteria; p__Planctomycetes; c__Planctomycetia; o__Planctomycetales; f__unclassified; g__unclassified; s__unclassified	0	0	0	0	0	0	0	1	0	0	1	0	2	0	0	0	0	0	0	0	0	0	0	0	0	0	0	0	0	0
OTU_13015	d__Bacteria; p__Actinobacteria; c__unclassified; o__Streptomycetales; f__Streptomycetaceae; g__unclassified; s__unclassified	0	0	0	0	0	0	0	0	0	0	2	0	0	0	0	0	0	0	0	0	0	0	0	0	0	0	0	0	0	0
OTU_13016	d__Bacteria; p__Proteobacteria; c__Betaproteobacteria; o__Burkholderiales; f__Oxalobacteraceae; g__unclassified; s__unclassified	0	1	0	0	0	0	0	0	0	0	0	0	0	0	0	0	0	0	0	0	0	0	0	0	0	0	0	0	0	0
OTU_13017	d__Bacteria; p__Actinobacteria; c__unclassified; o__Streptomycetales; f__Streptomycetaceae; g__Streptomyces; s__unclassified	0	0	0	0	0	0	0	0	0	0	1	0	0	0	0	0	0	0	0	0	0	0	0	0	0	0	0	0	0	0
OTU_13018	d__Bacteria; p__Proteobacteria; c__Alphaproteobacteria; o__Rhizobiales; f__Bradyrhizobiaceae; g__unclassified; s__unclassified	0	0	0	0	0	0	0	0	0	0	1	0	0	0	0	0	0	0	0	0	0	0	0	0	0	0	0	0	0	0
OTU_13019	d__Bacteria; p__Planctomycetes; c__Planctomycetia; o__Planctomycetales; f__unclassified; g__unclassified; s__unclassified	0	0	0	0	0	0	0	0	0	0	1	0	0	0	0	0	0	0	0	0	0	0	0	0	1	0	0	0	0	0
OTU_1302	d__Bacteria; p__Planctomycetes; c__Planctomycetia; o__Planctomycetales; f__unclassified; g__unclassified; s__unclassified	0	0	0	0	0	0	0	0	1	0	0	6	0	1	3	0	0	7	0	0	2	1	1	1	6	0	1	4	0	0
OTU_13021	Unassigned	0	1	0	0	1	1	0	0	0	0	1	0	0	0	0	1	2	0	0	1	0	0	0	0	0	0	2	0	0	2
OTU_13023	d__Bacteria; p__Proteobacteria; c__Gammaproteobacteria; o__Xanthomonadales; f__Xanthomonadaceae; g__unclassified; s__unclassified	0	0	0	0	0	0	0	0	0	0	0	0	0	0	0	0	1	0	0	0	0	0	0	0	0	0	0	0	0	0
OTU_13027	Unassigned	0	1	0	0	0	0	0	0	0	0	1	0	0	0	0	3	0	0	0	0	0	0	0	0	0	0	0	0	0	0
OTU_1303	d__Bacteria; p__Planctomycetes; c__unclassified; o__unclassified; f__unclassified; g__unclassified; s__unclassified	1	0	5	0	2	0	5	0	0	9	1	0	1	0	2	1	0	0	0	0	1	0	3	6	23	0	7	3	0	0
OTU_13030	d__Bacteria; p__Actinobacteria; c__unclassified; o__Streptomycetales; f__Streptomycetaceae; g__unclassified; s__unclassified	0	0	0	0	0	0	0	1	0	0	1	1	0	0	0	0	0	0	0	0	0	0	0	0	0	0	0	0	0	0
OTU_13031	d__Bacteria; p__Actinobacteria; c__unclassified; o__Pseudonocardiales; f__Pseudonocardiaceae; g__unclassified; s__unclassified	0	0	0	0	0	0	0	0	0	0	1	0	0	0	0	0	0	0	0	0	0	0	0	0	0	0	0	0	0	0
OTU_13033	d__Bacteria; p__Actinobacteria; c__unclassified; o__unclassified; f__unclassified; g__unclassified; s__unclassified	0	0	0	0	0	0	0	0	0	0	1	0	0	0	0	0	0	0	0	0	0	0	0	0	0	0	0	0	0	0
OTU_13039	d__Bacteria; p__unclassified; c__unclassified; o__unclassified; f__unclassified; g__unclassified; s__unclassified	0	0	0	0	0	0	0	0	0	0	1	0	0	0	0	0	0	0	0	0	0	0	0	0	0	0	0	0	0	0
OTU_1304	d__Bacteria; p__Actinobacteria; c__unclassified; o__Micromonosporales; f__Micromonosporaceae; g__unclassified; s__unclassified	0	0	0	2	2	0	0	0	1	0	0	2	0	0	1	0	0	0	0	2	3	0	0	1	13	0	3	0	0	2
OTU_13040	d__Bacteria; p__unclassified; c__unclassified; o__unclassified; f__unclassified; g__unclassified; s__unclassified	0	0	0	0	0	0	0	0	0	0	1	0	0	0	0	0	0	0	0	0	0	0	0	0	0	0	0	0	0	0
OTU_13045	d__Bacteria; p__Planctomycetes; c__unclassified; o__unclassified; f__unclassified; g__unclassified; s__unclassified	0	0	0	0	0	0	2	0	0	0	0	0	0	0	0	0	0	0	0	0	0	0	0	0	0	0	0	0	0	0
OTU_13047	Unassigned	0	0	0	0	0	0	0	0	0	0	2	0	0	0	0	0	0	0	0	0	0	0	0	0	0	0	1	0	0	0
OTU_1305	d__Bacteria; p__Actinobacteria; c__unclassified; o__Streptomycetales; f__Streptomycetaceae; g__unclassified; s__unclassified	0	0	2	1	1	2	0	1	0	0	2	5	0	8	5	0	0	5	9	3	0	5	2	3	11	1	1	3	2	0
OTU_13051	Unassigned	0	0	2	0	0	0	0	0	0	0	1	0	0	0	0	0	0	0	0	0	0	0	0	0	0	0	0	0	0	0
OTU_13054	d__Bacteria; p__Actinobacteria; c__unclassified; o__unclassified; f__unclassified; g__unclassified; s__unclassified	0	0	0	0	0	0	0	0	0	0	1	0	0	0	0	0	0	0	0	0	0	0	0	0	0	0	0	0	0	0
OTU_13055	d__Bacteria; p__Actinobacteria; c__unclassified; o__Streptomycetales; f__Streptomycetaceae; g__unclassified; s__unclassified	0	0	0	0	0	0	0	0	0	0	2	0	0	0	0	0	0	0	0	0	0	0	0	0	0	0	0	0	0	0
OTU_1306	Unassigned	6	3	5	0	3	5	6	3	18	7	9	8	10	17	4	4	4	8	22	29	11	28	10	5	23	8	23	29	16	11
OTU_13060	Unassigned	0	0	0	0	0	0	0	0	0	2	1	0	0	0	0	0	0	0	0	0	0	0	0	0	0	0	0	0	0	0
OTU_13064	d__Bacteria; p__Actinobacteria; c__unclassified; o__Pseudonocardiales; f__Pseudonocardiaceae; g__unclassified; s__unclassified	0	1	0	3	0	1	5	0	1	0	0	2	0	0	1	0	1	0	0	1	2	0	1	0	1	2	3	0	1	4
OTU_13066	d__Bacteria; p__Firmicutes; c__Bacilli; o__Bacillales; f__Bacillaceae; g__unclassified; s__unclassified	0	0	0	0	0	0	0	0	0	0	1	0	0	0	0	0	0	0	0	0	0	0	0	0	0	0	0	0	0	0
OTU_13069	Unassigned	0	0	0	0	0	0	0	1	0	0	2	0	0	0	0	0	1	0	0	0	0	0	0	0	0	0	1	0	1	0
OTU_1307	Unassigned	2	2	4	4	1	0	2	0	3	6	1	2	1	3	10	1	4	4	6	5	11	3	3	5	15	6	1	6	3	0
OTU_13071	Unassigned	0	0	0	0	0	0	0	0	0	0	1	0	0	0	0	0	0	0	0	0	0	0	0	0	0	0	0	0	0	0
OTU_13072	Unassigned	0	0	0	2	0	0	0	0	0	0	2	0	0	0	0	0	0	0	0	0	0	0	0	0	0	0	0	0	0	0
OTU_13073	d__Bacteria; p__Proteobacteria; c__Gammaproteobacteria; o__Xanthomonadales; f__Xanthomonadaceae; g__unclassified; s__unclassified	0	1	0	0	0	0	1	1	0	0	1	0	1	0	0	0	0	0	0	0	0	0	0	0	0	1	0	0	0	0
OTU_13076	Unassigned	0	0	0	0	0	0	0	0	0	0	0	2	0	0	0	1	0	0	0	0	0	0	0	0	0	0	0	0	0	0
OTU_13077	d__Bacteria; p__Actinobacteria; c__Rubrobacteria; o__Rubrobacterales; f__Rubrobacteraceae; g__unclassified; s__unclassified	0	0	0	0	0	0	0	0	0	0	0	2	0	0	0	0	0	0	0	0	0	0	0	0	0	0	0	0	0	0
OTU_1308	d__Bacteria; p__unclassified; c__unclassified; o__unclassified; f__unclassified; g__unclassified; s__unclassified	1	1	0	0	1	0	0	0	1	0	4	0	0	0	0	0	2	0	0	0	0	0	0	0	0	13	0	0	0	0
OTU_13081	Unassigned	0	0	0	0	0	0	0	0	0	0	0	1	0	0	0	0	0	0	0	0	0	0	0	0	0	0	0	0	0	0
OTU_13082	d__Bacteria; p__Actinobacteria; c__unclassified; o__unclassified; f__unclassified; g__unclassified; s__unclassified	0	0	0	0	0	0	0	0	0	0	0	2	0	0	0	0	0	0	0	0	0	0	0	0	0	0	0	0	0	0
OTU_13087	d__Bacteria; p__Actinobacteria; c__unclassified; o__Pseudonocardiales; f__Pseudonocardiaceae; g__unclassified; s__unclassified	0	0	0	0	0	0	0	0	0	0	0	2	0	0	0	0	0	0	0	0	0	0	0	0	0	0	0	0	0	0
OTU_13089	d__Bacteria; p__Planctomycetes; c__Planctomycetia; o__Planctomycetales; f__Isosphaeraceae; g__unclassified; s__unclassified	0	0	0	0	0	0	0	1	0	0	0	1	0	0	0	1	0	0	0	0	0	0	0	0	0	0	1	0	0	0
OTU_1309	d__Bacteria; p__Actinobacteria; c__unclassified; o__Streptomycetales; f__Streptomycetaceae; g__Streptomyces; s__unclassified	3	1	5	0	7	0	2	2	5	5	2	0	11	7	4	0	2	0	4	12	2	5	7	12	0	8	17	5	7	0
OTU_13091	Unassigned	0	0	0	0	0	0	0	0	0	0	0	2	0	0	0	0	0	0	0	0	0	0	0	0	0	0	0	0	0	0
OTU_13092	d__Bacteria; p__unclassified; c__unclassified; o__unclassified; f__unclassified; g__unclassified; s__unclassified	0	0	0	0	0	0	0	0	0	0	0	2	0	0	0	0	0	0	0	0	0	0	0	0	0	1	0	0	0	0
OTU_13094	d__Bacteria; p__Proteobacteria; c__Betaproteobacteria; o__Burkholderiales; f__Comamonadaceae; g__unclassified; s__unclassified	0	0	0	0	0	0	0	0	0	0	0	2	0	0	0	0	0	0	0	0	0	0	0	0	0	0	0	0	0	0
OTU_131	Unassigned	1	0	41	1	1	8	12	8	26	2	2	73	45	35	3	2	2	44	20	0	19	18	0	9	14	7	8	18	1	4
OTU_1310	Unassigned	6	5	2	7	2	3	6	4	6	7	2	1	5	1	0	2	1	0	3	0	2	1	9	4	2	1	9	3	3	5
OTU_13100	d__Bacteria; p__Proteobacteria; c__Betaproteobacteria; o__Burkholderiales; f__Comamonadaceae; g__unclassified; s__unclassified	0	0	0	0	0	0	0	0	0	0	0	1	0	0	0	0	0	0	0	0	0	0	0	0	0	0	0	0	0	0
OTU_13102	Unassigned	0	0	0	0	0	0	0	0	0	0	0	2	0	1	0	0	0	0	0	0	0	0	0	0	0	0	0	0	0	0
OTU_13103	Unassigned	0	0	0	0	0	0	0	0	0	0	0	1	0	0	0	0	0	0	0	0	0	0	0	0	0	0	0	0	0	0
OTU_13104	d__Bacteria; p__Planctomycetes; c__Planctomycetia; o__Planctomycetales; f__Isosphaeraceae; g__unclassified; s__unclassified	0	0	0	0	0	0	0	0	0	0	0	1	0	0	0	0	0	0	0	0	0	0	0	0	0	0	0	0	0	0
OTU_1311	d__Bacteria; p__Proteobacteria; c__Alphaproteobacteria; o__Caulobacterales; f__Caulobacteraceae; g__unclassified; s__unclassified	1	1	1	1	2	0	0	0	3	1	3	2	3	0	3	3	0	0	0	1	4	0	5	0	0	2	19	2	5	3
OTU_13112	Unassigned	0	0	1	0	0	0	0	1	0	0	0	2	1	0	0	0	0	0	1	0	0	2	0	1	2	1	2	0	0	0
OTU_13114	Unassigned	0	0	0	0	0	1	0	0	0	0	0	2	0	0	0	0	0	0	0	0	0	0	0	0	0	0	0	0	0	0
OTU_13118	d__Bacteria; p__Actinobacteria; c__Acidimicrobiia; o__Acidimicrobiales; f__unclassified; g__unclassified; s__unclassified	0	0	0	0	0	0	0	0	0	0	0	2	0	0	0	0	0	0	0	0	0	0	0	0	0	0	0	0	0	0
OTU_1312	Unassigned	6	2	0	15	1	1	0	1	5	3	4	10	3	4	0	2	4	0	0	3	0	1	1	0	0	2	17	9	2	0
OTU_13120	d__Bacteria; p__Planctomycetes; c__Planctomycetia; o__Planctomycetales; f__Isosphaeraceae; g__unclassified; s__unclassified	0	0	0	0	0	0	0	0	0	0	0	0	0	0	0	0	0	0	0	0	0	0	0	0	0	0	1	0	0	0
OTU_13121	d__Bacteria; p__Actinobacteria; c__unclassified; o__Frankiales; f__Frankiaceae; g__unclassified; s__unclassified	0	0	0	0	0	0	0	0	0	0	0	1	0	0	0	0	0	0	0	0	0	0	0	0	0	0	0	0	0	0
OTU_13128	d__Bacteria; p__Proteobacteria; c__Alphaproteobacteria; o__Rhizobiales; f__Bradyrhizobiaceae; g__unclassified; s__unclassified	0	0	0	0	0	1	0	0	1	0	0	0	0	0	0	0	0	0	1	0	0	0	0	0	0	1	0	1	0	0
OTU_1313	d__Bacteria; p__unclassified; c__unclassified; o__unclassified; f__unclassified; g__unclassified; s__unclassified	0	0	3	0	0	0	13	0	0	0	0	0	0	0	1	0	0	0	0	0	0	0	0	0	0	0	0	0	0	0
OTU_13136	d__Bacteria; p__Planctomycetes; c__unclassified; o__unclassified; f__unclassified; g__unclassified; s__unclassified	0	0	0	0	0	0	1	0	0	0	0	1	0	0	0	0	0	0	0	0	0	0	0	0	0	0	3	0	0	0
OTU_13138	Unassigned	0	0	1	0	0	0	0	0	0	0	0	1	0	0	0	0	0	0	0	0	0	0	0	0	0	0	0	0	1	1
OTU_1314	Unassigned	0	1	0	2	0	0	5	12	0	4	0	0	0	0	0	2	0	0	0	0	0	0	0	0	0	0	0	0	0	0
OTU_13140	d__Bacteria; p__Planctomycetes; c__unclassified; o__unclassified; f__unclassified; g__unclassified; s__unclassified	0	0	0	0	0	0	0	0	0	0	0	0	0	0	0	1	0	0	0	0	0	0	0	0	0	0	0	0	0	0
OTU_13144	d__Bacteria; p__unclassified; c__unclassified; o__unclassified; f__unclassified; g__unclassified; s__unclassified	0	0	0	0	0	0	0	0	0	0	1	1	0	0	0	0	0	0	0	0	0	0	0	0	0	0	1	0	0	0
OTU_13146	Unassigned	0	0	0	0	0	0	0	0	0	0	0	1	0	0	0	0	0	0	0	0	0	0	0	0	0	0	0	0	0	0
OTU_13148	d__Bacteria; p__Actinobacteria; c__unclassified; o__unclassified; f__unclassified; g__unclassified; s__unclassified	0	0	0	0	0	0	0	0	0	0	0	2	0	0	0	0	0	0	0	0	0	0	0	0	0	0	0	0	0	0
OTU_1315	d__Bacteria; p__Proteobacteria; c__Alphaproteobacteria; o__Rhizobiales; f__Bradyrhizobiaceae; g__Bradyrhizobium; s__unclassified	0	0	0	1	1	0	0	0	16	0	0	0	3	3	4	0	1	1	8	4	2	0	0	3	0	1	0	1	0	3
OTU_13152	d__Bacteria; p__Actinobacteria; c__unclassified; o__Streptomycetales; f__Streptomycetaceae; g__unclassified; s__unclassified	0	0	0	0	0	0	0	0	0	0	0	1	0	0	0	0	0	0	0	0	0	0	0	0	0	0	0	0	0	0
OTU_13154	d__Bacteria; p__Proteobacteria; c__Alphaproteobacteria; o__Caulobacterales; f__Caulobacteraceae; g__unclassified; s__unclassified	0	0	1	0	0	0	0	0	0	0	0	1	0	0	0	0	0	0	0	0	0	0	0	0	0	0	0	0	0	0
OTU_13157	d__Bacteria; p__Actinobacteria; c__unclassified; o__Frankiales; f__Frankiaceae; g__unclassified; s__unclassified	0	0	0	0	0	0	0	0	0	0	0	2	0	0	0	0	0	0	0	0	0	0	0	0	0	0	0	0	0	0
OTU_1316	d__Bacteria; p__Proteobacteria; c__Gammaproteobacteria; o__Xanthomonadales; f__Xanthomonadaceae; g__unclassified; s__unclassified	0	0	1	0	0	1	1	0	2	0	2	1	1	9	6	0	0	12	1	0	1	3	2	1	3	0	0	3	1	1
OTU_13160	Unassigned	0	0	0	0	0	0	0	0	0	0	0	2	0	0	0	0	0	0	0	0	0	0	0	0	0	0	0	0	0	0
OTU_13164	d__Bacteria; p__Proteobacteria; c__Alphaproteobacteria; o__Rhodospirillales; f__Acetobacteraceae; g__unclassified; s__unclassified	0	0	0	0	0	0	0	0	0	0	0	1	0	0	0	0	0	0	0	0	0	0	0	0	0	0	0	0	0	0
OTU_13169	d__Bacteria; p__Actinobacteria; c__unclassified; o__Streptomycetales; f__Streptomycetaceae; g__unclassified; s__unclassified	0	0	0	0	0	0	0	0	0	0	0	2	0	0	0	0	0	0	0	0	0	0	0	0	0	0	0	0	0	0
OTU_13170	Unassigned	0	0	0	0	0	0	0	1	0	0	0	2	0	0	0	1	0	0	0	0	0	0	0	0	0	0	0	0	0	0
OTU_13172	Unassigned	0	0	1	0	0	0	0	0	0	0	0	2	0	0	0	0	0	0	0	0	0	0	0	0	0	0	0	0	0	0
OTU_13174	d__Bacteria; p__Actinobacteria; c__unclassified; o__Streptomycetales; f__Streptomycetaceae; g__unclassified; s__unclassified	0	0	0	0	0	0	0	0	0	0	0	0	0	0	0	0	0	0	0	0	1	0	0	0	0	0	0	0	0	0
OTU_13177	d__Bacteria; p__Planctomycetes; c__unclassified; o__unclassified; f__unclassified; g__unclassified; s__unclassified	0	0	0	0	0	0	2	0	0	0	0	1	0	0	0	0	0	1	0	0	0	0	0	0	0	0	0	0	0	0
OTU_13178	Unassigned	0	0	0	0	0	0	0	0	0	0	0	1	0	0	0	0	0	0	0	0	0	0	0	0	0	0	0	0	0	0
OTU_13180	d__Bacteria; p__Actinobacteria; c__unclassified; o__Streptomycetales; f__Streptomycetaceae; g__unclassified; s__unclassified	0	0	1	0	0	0	0	0	0	0	0	1	1	0	0	0	0	0	0	0	0	0	0	0	0	0	0	0	0	0
OTU_13181	Unassigned	0	0	0	0	0	0	0	0	0	0	0	1	0	0	0	0	0	0	0	0	0	0	0	0	0	0	0	0	0	0
OTU_13184	d__Bacteria; p__Proteobacteria; c__Betaproteobacteria; o__Burkholderiales; f__Comamonadaceae; g__unclassified; s__unclassified	0	0	0	0	0	0	0	0	0	0	0	1	0	0	0	0	0	0	0	0	0	0	0	0	0	0	0	0	0	0
OTU_13189	Unassigned	1	0	0	0	0	0	0	1	1	0	0	2	0	0	0	1	0	0	0	0	0	0	1	0	0	2	0	0	0	0
OTU_1319	d__Bacteria; p__Planctomycetes; c__Planctomycetia; o__Planctomycetales; f__Isosphaeraceae; g__unclassified; s__unclassified	0	0	0	0	0	0	0	0	0	0	0	5	0	0	9	0	0	5	2	1	3	5	0	0	10	0	0	0	0	0
OTU_13190	Unassigned	0	0	0	0	0	0	0	0	0	0	0	2	0	0	0	0	0	0	0	0	0	0	0	0	0	0	0	0	0	0
OTU_13195	d__Bacteria; p__Actinobacteria; c__unclassified; o__Streptomycetales; f__Streptomycetaceae; g__unclassified; s__unclassified	0	0	0	0	0	0	0	0	0	0	0	1	0	0	0	0	0	0	0	0	0	0	0	0	0	0	0	0	0	0
OTU_132	d__Bacteria; p__Proteobacteria; c__Alphaproteobacteria; o__Rhizobiales; f__Bradyrhizobiaceae; g__Bradyrhizobium; s__unclassified	4	0	0	44	0	3	1	0	10	4	2	13	5	6	36	0	0	36	202	29	31	31	26	48	31	6	6	4	4	13
OTU_1320	d__Bacteria; p__Proteobacteria; c__Gammaproteobacteria; o__Xanthomonadales; f__Xanthomonadaceae; g__unclassified; s__unclassified	0	8	5	0	5	5	0	4	4	3	14	14	11	0	0	4	3	5	1	2	1	5	0	2	3	2	6	4	8	0
OTU_13201	d__Bacteria; p__Proteobacteria; c__Alphaproteobacteria; o__Rhodospirillales; f__Acetobacteraceae; g__unclassified; s__unclassified	0	0	0	0	0	0	0	0	0	0	0	1	0	0	0	0	0	0	0	0	0	0	0	0	0	0	0	0	0	0
OTU_13202	Unassigned	0	0	0	0	0	1	0	0	3	0	0	1	0	0	0	0	0	0	0	0	0	0	0	0	0	0	0	0	1	0
OTU_13208	d__Bacteria; p__unclassified; c__unclassified; o__unclassified; f__unclassified; g__unclassified; s__unclassified	0	0	0	0	0	0	0	0	0	0	0	1	0	0	0	0	0	0	0	0	0	0	0	0	0	0	0	0	0	0
OTU_13209	Unassigned	0	0	0	0	0	0	0	0	0	0	0	2	1	0	0	1	0	0	0	0	0	0	0	0	0	0	0	0	0	0
OTU_1321	d__Bacteria; p__Actinobacteria; c__unclassified; o__Streptomycetales; f__Streptomycetaceae; g__unclassified; s__unclassified	0	0	2	0	0	0	0	0	0	0	0	3	1	5	4	0	0	2	1	0	4	3	4	2	4	1	0	2	0	0
OTU_13216	d__Bacteria; p__Proteobacteria; c__Betaproteobacteria; o__Burkholderiales; f__Comamonadaceae; g__unclassified; s__unclassified	0	0	0	0	0	0	0	0	0	0	0	2	0	0	0	0	0	0	0	0	0	0	0	0	0	0	0	0	0	0
OTU_1322	Unassigned	0	0	0	0	0	0	0	0	0	0	0	2	1	9	0	0	0	0	8	0	0	4	0	0	3	0	0	3	0	0
OTU_13223	Unassigned	0	0	0	0	0	0	0	0	0	0	0	3	0	0	0	0	0	0	0	0	0	0	0	0	0	0	0	0	0	0
OTU_13225	Unassigned	0	0	0	0	0	0	0	0	0	0	0	1	0	0	0	0	0	0	0	0	0	0	0	1	0	0	0	0	0	0
OTU_13226	Unassigned	0	0	0	0	0	0	0	0	0	0	0	1	0	0	0	0	0	0	0	0	0	0	0	2	0	0	0	0	0	0
OTU_1323	d__Bacteria; p__Actinobacteria; c__unclassified; o__Pseudonocardiales; f__Pseudonocardiaceae; g__unclassified; s__unclassified	0	0	0	0	2	0	0	1	0	0	0	0	0	14	0	0	0	1	0	0	8	1	1	2	0	0	0	0	0	0
OTU_13230	d__Bacteria; p__Proteobacteria; c__Betaproteobacteria; o__Burkholderiales; f__Comamonadaceae; g__unclassified; s__unclassified	0	0	0	0	0	0	0	0	0	0	0	2	0	0	0	0	0	0	0	0	0	0	0	0	0	0	0	0	0	0
OTU_13232	d__Bacteria; p__Proteobacteria; c__Deltaproteobacteria; o__Myxococcales; f__Polyangiaceae; g__unclassified; s__unclassified	0	0	0	0	0	0	0	0	0	0	0	2	0	0	0	0	0	0	0	0	0	0	0	0	0	0	0	0	0	0
OTU_13235	Unassigned	0	0	0	0	0	0	0	0	0	0	0	1	0	0	0	0	0	0	0	0	0	0	0	0	0	0	0	0	0	0
OTU_13238	d__Bacteria; p__Proteobacteria; c__Gammaproteobacteria; o__Xanthomonadales; f__Xanthomonadaceae; g__unclassified; s__unclassified	0	0	0	0	0	0	0	0	0	0	0	1	0	0	0	0	0	0	0	0	0	0	0	0	0	0	0	0	0	0
OTU_1324	Unassigned	1	3	1	1	0	5	0	0	1	1	0	4	0	0	13	0	0	4	1	0	5	6	1	0	4	1	2	12	7	1
OTU_13241	Unassigned	0	0	0	0	0	0	0	0	0	0	0	1	0	0	0	0	0	0	0	0	0	0	0	0	0	0	0	0	0	0
OTU_13243	Unassigned	0	0	0	0	0	0	0	0	1	0	0	0	0	0	0	0	0	0	0	0	0	0	0	0	0	0	0	0	0	0
OTU_13244	Unassigned	0	0	0	0	0	0	0	0	0	0	1	2	1	0	0	1	0	0	0	0	0	0	0	0	0	0	0	0	0	0
OTU_13246	Unassigned	0	0	0	0	0	0	0	0	0	0	0	1	0	0	0	0	0	0	0	0	0	0	0	0	0	0	0	0	0	0
OTU_13247	d__Bacteria; p__Actinobacteria; c__unclassified; o__Micrococcales; f__Micrococcaceae; g__Arthrobacter; s__unclassified	0	0	0	0	0	0	0	0	0	0	0	1	0	0	0	0	2	0	0	0	0	0	0	0	0	0	0	0	0	0
OTU_13248	d__Bacteria; p__Planctomycetes; c__Planctomycetia; o__Planctomycetales; f__unclassified; g__unclassified; s__unclassified	0	0	0	0	0	0	0	0	0	0	1	1	0	0	0	0	0	0	0	0	0	0	0	0	0	0	0	0	0	0
OTU_1325	d__Bacteria; p__Actinobacteria; c__unclassified; o__Streptomycetales; f__Streptomycetaceae; g__unclassified; s__unclassified	0	0	0	0	0	0	0	0	0	0	0	0	0	0	11	0	0	0	4	0	3	0	0	0	0	0	0	8	0	0
OTU_13250	d__Bacteria; p__Planctomycetes; c__Planctomycetia; o__Planctomycetales; f__unclassified; g__unclassified; s__unclassified	0	0	0	0	0	0	0	0	0	0	0	2	0	0	0	0	0	0	0	0	0	0	0	0	0	0	0	0	0	0
OTU_13251	d__Bacteria; p__Firmicutes; c__Bacilli; o__Bacillales; f__Bacillaceae; g__unclassified; s__unclassified	0	0	0	0	0	0	0	1	0	0	0	1	0	0	0	0	1	0	0	0	0	0	0	0	0	0	0	0	0	0
OTU_13254	d__Bacteria; p__Planctomycetes; c__Planctomycetia; o__Planctomycetales; f__Isosphaeraceae; g__unclassified; s__unclassified	0	0	0	0	0	0	0	0	0	0	0	1	0	0	0	0	0	0	0	0	0	0	0	0	0	0	0	0	0	0
OTU_13257	Unassigned	0	0	0	0	1	0	0	0	0	0	0	1	0	0	0	0	1	0	0	1	0	0	0	0	0	0	0	0	1	0
OTU_1326	Unassigned	2	0	0	3	0	2	0	0	1	1	4	2	1	0	0	1	0	0	1	1	13	0	4	2	2	2	0	0	0	0
OTU_13265	d__Bacteria; p__Proteobacteria; c__Gammaproteobacteria; o__Xanthomonadales; f__Xanthomonadaceae; g__unclassified; s__unclassified	0	0	0	0	0	0	0	0	1	0	0	1	0	0	0	0	0	0	0	0	0	0	0	0	0	0	0	0	0	0
OTU_1327	d__Bacteria; p__Planctomycetes; c__Planctomycetia; o__Planctomycetales; f__unclassified; g__unclassified; s__unclassified	5	1	3	0	5	9	0	3	1	3	1	2	0	4	1	1	6	0	1	0	0	0	0	0	0	3	0	0	2	0
OTU_13270	d__Bacteria; p__Proteobacteria; c__Alphaproteobacteria; o__Rhodospirillales; f__unclassified; g__unclassified; s__unclassified	0	0	0	0	0	0	0	0	0	0	0	2	0	0	0	0	0	0	0	0	0	0	0	0	0	0	0	0	0	0
OTU_13272	d__Bacteria; p__Actinobacteria; c__unclassified; o__Streptomycetales; f__Streptomycetaceae; g__unclassified; s__unclassified	0	0	0	0	0	1	0	0	0	0	0	2	0	0	0	0	0	0	0	0	0	0	0	0	0	0	0	0	0	0
OTU_13274	Unassigned	0	0	0	0	0	0	0	0	0	0	0	2	0	0	0	0	0	0	0	0	0	0	0	0	0	0	0	0	0	0
OTU_13276	d__Bacteria; p__unclassified; c__unclassified; o__unclassified; f__unclassified; g__unclassified; s__unclassified	0	0	0	0	0	0	0	0	0	0	0	2	0	0	0	0	0	0	0	0	0	0	0	0	0	0	0	0	0	0
OTU_13277	d__Bacteria; p__Proteobacteria; c__Gammaproteobacteria; o__Xanthomonadales; f__Xanthomonadaceae; g__unclassified; s__unclassified	0	0	0	0	0	0	0	0	0	0	0	2	0	0	0	0	1	0	0	0	1	0	0	0	0	0	0	0	0	0
OTU_13279	d__Bacteria; p__Planctomycetes; c__Planctomycetia; o__Planctomycetales; f__unclassified; g__unclassified; s__unclassified	0	0	0	0	0	0	0	0	0	0	0	2	0	0	0	0	0	0	0	0	1	0	0	0	0	0	0	0	0	0
OTU_1328	d__Bacteria; p__Proteobacteria; c__unclassified; o__unclassified; f__unclassified; g__unclassified; s__unclassified	10	11	4	2	3	5	9	9	0	13	5	0	6	0	0	11	6	1	2	5	1	0	3	2	0	18	7	4	9	16
OTU_13281	Unassigned	0	0	0	0	0	0	0	0	0	0	0	2	0	0	0	0	0	0	0	0	0	0	0	0	0	0	0	0	0	0
OTU_13284	d__Bacteria; p__Planctomycetes; c__Planctomycetia; o__Planctomycetales; f__Isosphaeraceae; g__unclassified; s__unclassified	0	0	0	0	0	0	0	0	0	0	0	2	0	0	0	0	0	0	0	0	0	0	0	0	0	0	0	0	0	0
OTU_13285	d__Bacteria; p__Proteobacteria; c__Alphaproteobacteria; o__Rhizobiales; f__Bradyrhizobiaceae; g__unclassified; s__unclassified	0	0	0	0	0	0	0	0	0	0	0	2	0	0	1	0	0	0	0	0	0	0	0	0	0	0	0	0	0	0
OTU_13286	Unassigned	0	2	0	0	0	0	0	0	0	0	0	0	0	0	0	0	2	0	0	0	0	0	0	0	0	0	0	0	0	0
OTU_13288	d__Bacteria; p__Proteobacteria; c__Alphaproteobacteria; o__Rhodospirillales; f__Acetobacteraceae; g__unclassified; s__unclassified	0	0	0	0	0	0	0	0	0	0	0	2	0	0	0	0	0	0	0	0	0	0	0	0	0	0	0	0	0	0
OTU_1329	d__Bacteria; p__Actinobacteria; c__unclassified; o__Streptomycetales; f__Streptomycetaceae; g__unclassified; s__unclassified	14	6	0	5	3	0	1	5	4	14	6	0	5	0	3	6	16	0	0	7	0	0	1	1	0	12	0	0	5	4
OTU_13293	d__Bacteria; p__Planctomycetes; c__Planctomycetia; o__Planctomycetales; f__unclassified; g__unclassified; s__unclassified	0	0	0	0	0	0	0	0	0	0	0	1	0	0	0	0	0	1	0	0	0	0	0	0	0	0	0	0	0	0
OTU_13295	d__Bacteria; p__Proteobacteria; c__Alphaproteobacteria; o__Rhizobiales; f__Bradyrhizobiaceae; g__unclassified; s__unclassified	0	0	0	0	0	0	0	0	0	0	0	2	0	0	0	0	0	0	0	0	0	0	0	0	0	0	0	0	0	0
OTU_13296	d__Bacteria; p__Planctomycetes; c__Planctomycetia; o__Planctomycetales; f__unclassified; g__unclassified; s__unclassified	0	0	0	0	0	0	0	0	0	0	0	0	0	0	0	0	0	0	0	0	0	0	0	0	0	0	0	0	0	0
OTU_13297	d__Bacteria; p__Actinobacteria; c__unclassified; o__Streptomycetales; f__Streptomycetaceae; g__unclassified; s__unclassified	0	0	0	0	0	0	0	0	0	0	0	1	2	0	0	0	0	0	0	0	0	0	0	0	0	0	0	0	1	0
OTU_13299	d__Bacteria; p__Planctomycetes; c__Planctomycetia; o__Planctomycetales; f__unclassified; g__unclassified; s__unclassified	0	0	0	0	0	0	0	0	0	0	0	1	1	0	0	0	0	0	0	0	0	0	0	0	0	0	0	0	0	0
OTU_133	Unassigned	10	1	51	28	0	15	12	3	11	3	0	14	6	17	72	3	9	28	8	13	63	30	22	53	27	6	9	20	16	23
OTU_13300	Unassigned	0	0	0	0	0	0	0	0	0	0	0	1	0	0	0	0	0	0	0	0	1	0	0	0	0	0	0	0	0	0
OTU_13307	d__Bacteria; p__Planctomycetes; c__unclassified; o__unclassified; f__unclassified; g__unclassified; s__unclassified	0	0	0	0	0	0	0	0	0	0	0	0	0	0	0	0	0	0	0	0	0	0	0	0	0	0	0	0	0	0
OTU_1331	Unassigned	0	1	0	1	3	0	1	1	3	0	0	0	0	0	0	0	2	0	0	0	0	0	1	1	0	2	0	0	2	1
OTU_13312	Unassigned	0	0	0	0	2	0	0	0	0	0	0	1	0	0	0	1	0	0	0	0	0	0	0	0	1	0	0	0	0	0
OTU_13313	Unassigned	0	1	0	0	0	0	0	0	0	0	0	0	0	0	0	0	0	0	0	0	0	0	0	0	0	0	0	0	0	0
OTU_13316	d__Bacteria; p__unclassified; c__unclassified; o__unclassified; f__unclassified; g__unclassified; s__unclassified	0	0	0	0	0	0	0	0	0	0	0	0	0	0	0	0	0	0	0	0	0	0	0	0	0	0	0	0	0	0
OTU_13319	d__Bacteria; p__Proteobacteria; c__Gammaproteobacteria; o__Xanthomonadales; f__Xanthomonadaceae; g__unclassified; s__unclassified	0	0	0	0	0	0	0	0	0	0	0	0	0	0	0	0	0	0	0	0	0	0	0	0	0	0	0	0	0	0
OTU_1332	d__Bacteria; p__unclassified; c__unclassified; o__unclassified; f__unclassified; g__unclassified; s__unclassified	0	0	0	0	0	0	0	0	0	0	0	0	0	0	0	0	0	1	0	0	0	0	0	0	0	0	0	0	0	0
OTU_13324	Unassigned	0	0	0	0	0	0	0	0	0	0	0	0	0	0	0	0	0	0	0	0	0	0	0	0	0	0	0	0	0	0
OTU_13327	d__Bacteria; p__Actinobacteria; c__unclassified; o__Streptomycetales; f__Streptomycetaceae; g__unclassified; s__unclassified	0	0	0	0	0	0	0	0	0	0	0	0	0	0	0	0	0	0	0	0	0	0	0	0	0	0	0	0	0	0
OTU_1333	d__Bacteria; p__Proteobacteria; c__Gammaproteobacteria; o__Xanthomonadales; f__Xanthomonadaceae; g__unclassified; s__unclassified	6	3	2	13	2	1	0	2	1	2	4	3	21	1	1	0	2	1	1	2	8	4	10	6	0	8	1	3	11	1
OTU_13330	d__Bacteria; p__Actinobacteria; c__unclassified; o__Streptomycetales; f__Streptomycetaceae; g__unclassified; s__unclassified	0	0	0	0	0	0	0	0	0	0	0	0	0	0	0	0	0	0	0	0	0	0	0	0	0	0	0	0	0	0
OTU_13335	d__Bacteria; p__Proteobacteria; c__Alphaproteobacteria; o__Rhizobiales; f__Bradyrhizobiaceae; g__unclassified; s__unclassified	0	0	0	0	0	0	0	0	0	0	0	0	0	0	0	0	0	0	0	0	0	0	0	0	0	0	0	0	0	0
OTU_13337	d__Bacteria; p__Actinobacteria; c__Rubrobacteria; o__Rubrobacterales; f__Rubrobacteraceae; g__unclassified; s__unclassified	0	1	0	0	0	0	0	0	0	0	0	0	0	0	0	0	0	0	0	1	0	0	1	0	0	0	0	0	0	0
OTU_13338	d__Bacteria; p__Actinobacteria; c__unclassified; o__Streptomycetales; f__Streptomycetaceae; g__unclassified; s__unclassified	0	0	0	1	0	1	1	0	0	1	0	0	2	0	0	0	0	0	0	0	0	0	0	1	0	0	0	0	0	0
OTU_1334	d__Bacteria; p__unclassified; c__unclassified; o__unclassified; f__unclassified; g__unclassified; s__unclassified	0	10	3	13	8	12	7	6	0	0	4	2	4	1	0	4	7	0	0	0	1	2	1	6	0	3	12	2	5	12
OTU_13342	d__Bacteria; p__Proteobacteria; c__Alphaproteobacteria; o__Caulobacterales; f__Caulobacteraceae; g__unclassified; s__unclassified	0	0	0	0	0	0	0	0	0	0	0	0	0	0	0	0	0	0	0	0	0	0	0	0	0	0	0	0	0	0
OTU_13343	Unassigned	0	0	0	0	0	0	0	0	0	0	0	0	0	0	0	0	0	0	0	0	0	0	0	0	0	0	0	0	0	0
OTU_13344	Unassigned	0	0	0	0	0	0	0	0	0	0	0	0	0	0	0	0	0	0	1	0	0	0	0	0	0	0	0	0	0	0
OTU_13345	d__Bacteria; p__Proteobacteria; c__Gammaproteobacteria; o__Pseudomonadales; f__Pseudomonadaceae; g__unclassified; s__unclassified	0	0	0	0	0	0	0	0	0	0	0	0	0	0	0	0	0	0	0	0	0	0	0	0	0	0	0	0	0	0
OTU_13346	d__Bacteria; p__Actinobacteria; c__unclassified; o__Streptomycetales; f__Streptomycetaceae; g__unclassified; s__unclassified	0	0	0	0	0	0	0	0	0	0	0	0	0	0	0	0	0	0	0	0	0	0	0	0	0	0	0	0	0	0
OTU_13348	d__Bacteria; p__Actinobacteria; c__unclassified; o__Streptomycetales; f__Streptomycetaceae; g__unclassified; s__unclassified	0	0	0	0	0	0	0	0	0	0	0	0	0	0	0	0	0	0	0	0	0	0	0	0	0	0	0	0	0	0
OTU_1335	d__Bacteria; p__Actinobacteria; c__unclassified; o__Micromonosporales; f__Micromonosporaceae; g__unclassified; s__unclassified	3	7	0	4	7	15	3	3	6	10	5	5	1	1	3	15	4	1	0	0	0	0	1	0	0	2	0	3	0	7
OTU_13350	d__Bacteria; p__Planctomycetes; c__Planctomycetia; o__Planctomycetales; f__unclassified; g__unclassified; s__unclassified	0	0	0	1	0	0	0	1	2	0	0	0	1	0	0	0	3	0	2	1	0	2	0	0	0	0	0	2	0	0
OTU_13353	Unassigned	0	0	0	0	0	0	0	0	0	0	0	0	0	0	0	0	0	0	0	0	0	0	0	0	0	0	0	0	0	0
OTU_13354	d__Bacteria; p__Actinobacteria; c__unclassified; o__Streptomycetales; f__Streptomycetaceae; g__unclassified; s__unclassified	0	0	0	0	0	0	0	0	0	0	0	0	0	0	0	0	0	0	0	0	0	0	0	0	0	0	0	0	0	0
OTU_13355	Unassigned	0	0	0	0	0	0	0	0	0	0	0	0	0	0	0	0	0	0	0	0	0	0	0	0	0	0	0	0	0	0
OTU_13359	Unassigned	0	0	0	0	0	0	0	0	0	0	0	0	0	0	0	0	0	0	0	0	0	0	0	0	1	0	0	0	0	0
OTU_1336	d__Bacteria; p__Planctomycetes; c__Planctomycetia; o__Planctomycetales; f__unclassified; g__unclassified; s__unclassified	1	3	0	0	2	11	3	6	0	1	0	0	2	0	0	4	5	0	0	13	0	0	0	0	2	4	0	0	4	0
OTU_13364	Unassigned	0	0	0	0	0	0	0	0	0	0	0	0	0	0	0	0	0	0	0	0	0	0	0	0	0	0	0	0	0	0
OTU_13366	d__Bacteria; p__Actinobacteria; c__unclassified; o__Streptomycetales; f__Streptomycetaceae; g__unclassified; s__unclassified	0	0	0	0	0	0	0	0	0	0	0	0	0	0	0	0	0	0	0	0	0	0	0	0	0	0	0	0	0	0
OTU_1337	d__Bacteria; p__Planctomycetes; c__Planctomycetia; o__Planctomycetales; f__unclassified; g__unclassified; s__unclassified	4	4	1	3	3	10	5	5	4	2	6	0	4	0	0	0	4	0	0	4	4	0	1	6	0	3	2	1	2	0
OTU_13374	d__Bacteria; p__Actinobacteria; c__Rubrobacteria; o__Rubrobacterales; f__Rubrobacteraceae; g__unclassified; s__unclassified	0	0	0	0	0	0	0	0	0	0	0	0	0	0	0	0	0	0	0	0	0	0	0	0	0	0	0	0	0	0
OTU_13377	d__Bacteria; p__unclassified; c__unclassified; o__unclassified; f__unclassified; g__unclassified; s__unclassified	0	0	0	0	0	0	0	0	0	0	0	0	0	1	0	0	0	0	1	0	0	0	0	0	0	0	0	0	0	0
OTU_13379	d__Bacteria; p__Actinobacteria; c__unclassified; o__Streptomycetales; f__Streptomycetaceae; g__unclassified; s__unclassified	0	0	0	0	0	0	0	0	0	0	0	0	0	0	0	0	0	0	0	0	0	0	0	0	0	0	1	0	0	0
OTU_1338	d__Bacteria; p__unclassified; c__unclassified; o__unclassified; f__unclassified; g__unclassified; s__unclassified	0	0	0	0	0	0	0	0	0	0	0	0	0	0	0	0	0	0	0	0	0	0	0	0	0	0	0	0	0	0
OTU_13380	Unassigned	0	0	0	1	0	0	0	0	0	0	0	0	0	0	0	0	0	1	0	0	0	0	1	0	2	0	1	0	0	0
OTU_13383	Unassigned	0	0	0	0	0	0	0	0	0	0	0	0	0	0	0	0	0	0	0	0	0	0	0	0	0	0	0	0	0	0
OTU_1339	d__Bacteria; p__Proteobacteria; c__Gammaproteobacteria; o__Xanthomonadales; f__Xanthomonadaceae; g__unclassified; s__unclassified	0	0	0	0	0	0	0	0	1	0	0	1	2	0	0	0	0	1	4	0	2	1	2	0	0	0	4	0	0	4
OTU_13391	d__Bacteria; p__unclassified; c__unclassified; o__unclassified; f__unclassified; g__unclassified; s__unclassified	0	0	0	0	0	0	0	0	0	0	0	0	0	0	0	0	0	0	0	0	0	0	0	0	0	0	0	0	0	0
OTU_13393	d__Bacteria; p__Planctomycetes; c__Planctomycetia; o__Planctomycetales; f__unclassified; g__unclassified; s__unclassified	0	0	0	0	0	0	0	0	0	0	0	0	0	0	0	0	0	0	0	0	0	0	0	0	0	0	0	0	0	0
OTU_13399	Unassigned	0	0	0	0	0	0	0	0	0	0	0	0	0	0	0	0	0	0	0	0	0	0	0	0	0	0	0	0	0	0
OTU_134	d__Bacteria; p__Actinobacteria; c__unclassified; o__unclassified; f__unclassified; g__unclassified; s__unclassified	57	44	60	77	34	60	33	37	32	31	57	66	28	1	18	42	23	21	0	46	42	46	40	88	97	62	96	95	83	67
OTU_1340	d__Bacteria; p__Planctomycetes; c__Planctomycetia; o__Planctomycetales; f__Isosphaeraceae; g__unclassified; s__unclassified	7	1	4	3	0	0	2	1	0	0	1	1	2	14	6	2	3	1	4	0	0	4	0	4	8	2	4	0	1	1
OTU_13406	d__Bacteria; p__Proteobacteria; c__Alphaproteobacteria; o__Rhizobiales; f__Bradyrhizobiaceae; g__Bradyrhizobium; s__unclassified	0	0	0	0	0	0	0	0	0	0	0	0	0	0	0	0	0	0	0	0	0	0	0	0	0	0	0	0	0	0
OTU_13408	Unassigned	0	0	0	0	0	0	0	0	0	0	0	0	0	0	0	0	0	0	0	0	0	0	0	0	0	0	0	0	0	0
OTU_1341	Unassigned	0	0	0	0	0	0	0	0	2	0	0	1	1	4	0	0	0	2	1	0	0	0	1	0	3	0	0	2	2	0
OTU_13410	d__Bacteria; p__Actinobacteria; c__unclassified; o__Micromonosporales; f__Micromonosporaceae; g__Actinoplanes; s__unclassified	0	0	0	0	0	0	0	0	0	0	0	0	0	0	0	0	0	0	0	0	0	0	0	0	0	0	0	0	0	0
OTU_13412	d__Bacteria; p__Proteobacteria; c__Gammaproteobacteria; o__Xanthomonadales; f__Xanthomonadaceae; g__unclassified; s__unclassified	1	0	0	1	0	1	1	2	0	4	0	0	0	3	4	0	1	1	2	1	7	2	2	1	2	1	0	1	1	2
OTU_13413	d__Bacteria; p__Planctomycetes; c__Planctomycetia; o__Planctomycetales; f__Planctomycetaceae; g__unclassified; s__unclassified	0	0	0	0	0	0	0	0	0	0	0	0	0	0	0	0	0	0	0	0	0	0	0	0	0	0	0	0	0	0
OTU_13422	d__Bacteria; p__Proteobacteria; c__Gammaproteobacteria; o__Pseudomonadales; f__Pseudomonadaceae; g__unclassified; s__unclassified	0	0	0	0	0	0	0	0	0	0	0	0	0	0	0	0	0	0	0	0	0	0	0	0	0	0	0	0	0	0
OTU_13427	d__Bacteria; p__Actinobacteria; c__unclassified; o__unclassified; f__unclassified; g__unclassified; s__unclassified	0	0	0	0	0	0	0	0	0	0	0	0	0	0	0	0	0	0	0	0	0	0	0	0	0	0	0	0	0	1
OTU_13428	Unassigned	0	0	0	0	0	0	0	0	0	0	0	0	0	1	0	0	0	0	0	0	0	2	0	0	0	0	0	0	0	0
OTU_1343	d__Bacteria; p__Proteobacteria; c__Alphaproteobacteria; o__Rhodospirillales; f__Acetobacteraceae; g__unclassified; s__unclassified	0	1	1	3	0	2	1	0	0	1	1	1	1	0	0	2	4	0	1	1	1	3	9	8	2	2	8	5	0	0
OTU_13431	d__Bacteria; p__Proteobacteria; c__Gammaproteobacteria; o__Pseudomonadales; f__Pseudomonadaceae; g__unclassified; s__unclassified	0	0	0	0	0	0	0	0	0	0	0	0	0	0	0	0	0	0	0	0	0	0	0	0	0	1	0	0	0	0
OTU_1344	Unassigned	0	0	0	0	0	0	0	0	0	0	0	0	0	0	0	0	0	0	0	0	0	0	0	0	0	0	0	0	13	0
OTU_13444	Unassigned	0	0	0	0	0	0	0	0	0	0	0	0	0	0	0	0	0	0	0	0	0	0	0	0	0	0	0	0	0	0
OTU_13447	Unassigned	0	0	0	0	0	0	0	0	0	0	0	0	0	0	0	0	0	0	0	0	0	0	0	0	0	0	0	0	0	0
OTU_13448	d__Bacteria; p__Planctomycetes; c__unclassified; o__unclassified; f__unclassified; g__unclassified; s__unclassified	0	0	0	0	0	0	0	0	0	0	0	0	0	0	0	0	0	0	0	0	0	0	0	0	0	0	0	1	0	0
OTU_1345	d__Bacteria; p__Planctomycetes; c__Planctomycetia; o__Planctomycetales; f__Isosphaeraceae; g__unclassified; s__unclassified	0	0	0	0	0	0	0	0	0	0	0	5	0	0	0	0	0	0	0	0	0	0	0	0	0	0	0	0	0	10
OTU_13452	d__Bacteria; p__Proteobacteria; c__Deltaproteobacteria; o__Myxococcales; f__Myxococcaceae; g__unclassified; s__unclassified	0	0	0	0	0	0	0	0	0	0	0	0	0	0	0	0	0	0	0	0	0	0	0	0	0	0	0	0	0	0
OTU_13456	d__Bacteria; p__Proteobacteria; c__Gammaproteobacteria; o__Pseudomonadales; f__Pseudomonadaceae; g__unclassified; s__unclassified	0	0	0	0	0	0	0	0	0	0	0	0	0	0	0	0	0	0	0	0	0	0	0	0	0	0	0	0	0	0
OTU_13457	Unassigned	0	0	0	0	0	0	0	0	0	0	0	0	0	0	0	0	0	0	0	0	0	0	0	0	0	0	0	0	0	0
OTU_13458	Unassigned	0	0	0	0	0	1	0	0	0	0	0	1	0	0	0	0	0	0	0	0	0	0	0	0	0	0	0	0	0	0
OTU_1346	d__Bacteria; p__Actinobacteria; c__unclassified; o__Streptomycetales; f__Streptomycetaceae; g__unclassified; s__unclassified	0	2	0	8	2	3	5	5	0	3	0	3	0	1	0	0	1	1	0	1	1	2	3	6	0	3	0	0	1	9
OTU_13460	Unassigned	0	0	0	0	0	0	0	0	0	0	0	0	0	0	0	0	0	0	0	0	0	0	0	0	0	0	0	0	0	0
OTU_13464	d__Bacteria; p__Proteobacteria; c__Gammaproteobacteria; o__Xanthomonadales; f__Xanthomonadaceae; g__unclassified; s__unclassified	0	0	0	0	0	0	0	0	0	0	0	0	0	0	0	0	0	0	0	0	0	0	0	0	0	0	0	0	0	0
OTU_13465	d__Bacteria; p__unclassified; c__unclassified; o__unclassified; f__unclassified; g__unclassified; s__unclassified	0	0	0	0	0	0	0	0	0	0	0	0	0	0	0	0	0	1	0	0	0	0	0	0	0	0	0	0	0	0
OTU_13466	Unassigned	0	0	0	0	0	0	0	0	0	0	0	0	0	0	0	0	0	0	0	0	0	0	0	0	0	0	0	0	0	0
OTU_1347	Unassigned	3	2	5	0	0	0	0	0	1	5	2	1	0	8	1	0	4	4	5	0	4	3	5	6	6	4	0	4	0	7
OTU_13470	d__Bacteria; p__Actinobacteria; c__unclassified; o__Streptomycetales; f__Streptomycetaceae; g__unclassified; s__unclassified	0	0	0	0	0	0	0	0	0	0	0	0	0	0	0	0	0	0	0	0	0	0	0	0	0	0	0	0	0	0
OTU_13473	Unassigned	0	1	0	0	0	0	0	0	0	0	1	0	0	0	0	0	0	0	0	0	1	0	0	0	0	0	0	0	0	0
OTU_13477	Unassigned	0	0	0	0	0	0	0	0	1	0	0	0	0	0	0	0	0	0	0	0	0	0	0	0	0	0	0	0	0	0
OTU_13478	d__Bacteria; p__Planctomycetes; c__Planctomycetia; o__Planctomycetales; f__Isosphaeraceae; g__unclassified; s__unclassified	0	0	0	0	0	0	0	0	0	0	0	0	0	0	0	0	0	0	0	0	0	0	0	0	0	0	0	0	0	0
OTU_1348	Unassigned	0	0	1	0	0	0	0	0	3	2	1	2	1	0	0	1	0	0	2	0	1	6	1	1	1	0	0	1	3	0
OTU_13480	Unassigned	0	0	0	0	0	0	0	1	0	1	0	0	0	0	0	0	0	0	2	0	1	0	0	0	0	0	0	0	0	0
OTU_13481	d__Bacteria; p__Proteobacteria; c__Alphaproteobacteria; o__Rhizobiales; f__unclassified; g__unclassified; s__unclassified	0	0	0	0	0	0	0	0	0	0	0	0	0	0	0	0	0	0	0	0	0	0	0	0	0	0	0	0	0	0
OTU_13483	d__Bacteria; p__Planctomycetes; c__Planctomycetia; o__Planctomycetales; f__Isosphaeraceae; g__unclassified; s__unclassified	0	0	0	0	0	0	0	0	0	0	0	0	0	0	0	0	0	0	0	0	0	0	0	0	0	0	0	0	0	0
OTU_13484	d__Bacteria; p__Proteobacteria; c__unclassified; o__unclassified; f__unclassified; g__unclassified; s__unclassified	0	0	0	0	0	0	0	0	0	0	0	0	1	0	0	0	0	0	0	0	0	0	0	0	0	0	0	0	0	0
OTU_13485	d__Bacteria; p__Planctomycetes; c__Planctomycetia; o__Planctomycetales; f__unclassified; g__unclassified; s__unclassified	0	0	0	0	0	0	0	0	1	0	0	0	0	0	0	0	0	0	0	0	0	0	0	0	0	0	0	0	0	1
OTU_13489	Unassigned	0	0	0	0	0	0	0	0	0	0	0	0	0	0	0	0	0	0	2	0	0	0	0	0	0	0	0	0	0	0
OTU_1349	Unassigned	3	0	1	0	0	0	0	0	3	1	0	9	7	1	2	0	8	3	1	17	6	6	5	2	1	5	0	6	7	0
OTU_13490	d__Bacteria; p__Proteobacteria; c__unclassified; o__unclassified; f__unclassified; g__unclassified; s__unclassified	0	0	0	0	0	0	0	0	2	0	0	0	0	0	0	0	0	0	1	0	0	0	0	0	0	0	0	0	0	0
OTU_13491	d__Bacteria; p__unclassified; c__unclassified; o__unclassified; f__unclassified; g__unclassified; s__unclassified	0	0	0	0	0	0	0	0	2	0	0	0	0	0	0	0	0	0	0	0	0	0	0	0	0	0	0	0	0	0
OTU_13493	d__Bacteria; p__Planctomycetes; c__Planctomycetia; o__Planctomycetales; f__Gemmataceae; g__Gemmata; s__unclassified	0	0	0	0	0	0	0	0	0	0	0	0	0	0	0	0	0	0	0	0	0	0	0	0	0	0	0	0	0	0
OTU_13495	Unassigned	0	0	1	0	0	0	2	1	0	0	0	0	0	0	0	0	0	0	0	0	0	0	0	0	0	0	0	0	0	0
OTU_13497	d__Bacteria; p__Proteobacteria; c__Gammaproteobacteria; o__Xanthomonadales; f__Xanthomonadaceae; g__unclassified; s__unclassified	0	0	0	0	0	0	0	0	0	0	0	0	0	0	0	0	0	0	0	0	0	0	0	0	0	0	0	0	0	0
OTU_13499	Unassigned	0	0	0	0	0	0	0	0	0	0	0	0	0	0	0	0	0	0	1	0	0	0	2	0	0	0	0	0	0	0
OTU_135	Unassigned	190	47	19	73	57	110	32	89	40	104	83	19	24	10	2	48	97	0	2	10	7	4	38	36	10	22	58	18	37	33
OTU_1350	d__Bacteria; p__unclassified; c__unclassified; o__unclassified; f__unclassified; g__unclassified; s__unclassified	0	0	0	0	0	0	0	0	3	0	0	2	0	2	1	0	0	0	4	0	6	0	13	1	0	0	0	0	0	0
OTU_13503	d__Bacteria; p__Proteobacteria; c__Gammaproteobacteria; o__Xanthomonadales; f__Xanthomonadaceae; g__unclassified; s__unclassified	0	0	0	0	0	0	0	0	0	0	0	0	0	0	0	0	0	0	0	0	0	0	0	0	0	0	0	0	0	0
OTU_13512	d__Bacteria; p__Proteobacteria; c__Alphaproteobacteria; o__Rhizobiales; f__Bradyrhizobiaceae; g__unclassified; s__unclassified	0	0	0	0	0	0	0	0	0	0	0	0	0	0	0	0	0	0	0	0	0	0	0	0	0	0	0	0	0	0
OTU_13513	Unassigned	0	0	0	0	0	1	0	1	0	0	0	1	2	1	0	0	0	0	1	0	0	0	0	1	0	1	1	0	0	0
OTU_13519	Unassigned	0	0	0	0	0	0	0	0	0	0	0	0	0	0	0	0	0	0	0	0	0	0	0	0	0	0	0	0	0	0
OTU_1352	d__Bacteria; p__unclassified; c__unclassified; o__unclassified; f__unclassified; g__unclassified; s__unclassified	0	7	0	0	0	1	0	0	0	0	12	1	4	0	0	1	2	0	0	0	0	0	0	2	0	4	0	0	6	0
OTU_13525	d__Bacteria; p__unclassified; c__unclassified; o__unclassified; f__unclassified; g__unclassified; s__unclassified	0	0	0	0	0	0	0	0	0	0	0	0	0	0	0	2	0	0	0	0	0	0	0	0	0	0	0	0	0	0
OTU_13526	Unassigned	0	0	0	0	0	0	0	0	0	0	0	0	0	0	0	2	0	0	0	0	0	0	0	0	0	0	0	0	0	0
OTU_13528	d__Bacteria; p__Actinobacteria; c__unclassified; o__Pseudonocardiales; f__Pseudonocardiaceae; g__unclassified; s__unclassified	0	0	0	0	0	0	0	1	0	0	0	0	0	0	0	1	0	0	0	0	0	0	0	0	1	0	0	0	0	0
OTU_13529	Unassigned	2	3	5	1	1	1	1	1	6	5	4	2	4	3	0	3	5	2	1	4	4	3	2	1	3	3	2	3	3	5
OTU_13531	d__Bacteria; p__unclassified; c__unclassified; o__unclassified; f__unclassified; g__unclassified; s__unclassified	0	0	0	0	0	0	0	0	0	0	0	0	0	0	0	1	0	0	0	0	0	0	0	0	0	0	0	0	0	0
OTU_13533	d__Bacteria; p__Proteobacteria; c__Alphaproteobacteria; o__Rhizobiales; f__Bradyrhizobiaceae; g__unclassified; s__unclassified	0	0	0	0	0	0	0	0	0	0	0	0	0	0	0	2	0	0	0	0	0	0	0	0	0	0	0	0	0	0
OTU_13535	Unassigned	0	0	0	0	0	0	0	0	0	0	0	0	0	0	0	2	0	0	0	0	0	0	0	0	0	0	0	0	0	0
OTU_13539	d__Bacteria; p__Actinobacteria; c__unclassified; o__unclassified; f__unclassified; g__unclassified; s__unclassified	0	0	0	0	0	0	0	0	0	0	0	0	0	0	0	1	0	0	0	0	0	0	0	0	0	0	0	0	0	1
OTU_1354	d__Bacteria; p__Proteobacteria; c__Alphaproteobacteria; o__Caulobacterales; f__Caulobacteraceae; g__unclassified; s__unclassified	0	9	0	0	2	1	4	2	0	9	8	0	0	0	0	1	0	0	0	0	0	0	0	0	0	0	1	0	5	0
OTU_13540	Unassigned	0	0	0	0	0	0	0	0	0	0	0	0	0	0	0	2	0	0	0	0	0	0	0	0	0	0	0	0	0	0
OTU_13544	d__Bacteria; p__Proteobacteria; c__unclassified; o__unclassified; f__unclassified; g__unclassified; s__unclassified	0	0	0	0	0	0	0	0	0	0	0	0	0	0	0	1	0	0	0	0	0	0	0	0	0	0	0	0	0	0
OTU_13546	d__Bacteria; p__Actinobacteria; c__unclassified; o__unclassified; f__unclassified; g__unclassified; s__unclassified	1	0	0	0	0	0	0	0	0	0	0	0	0	0	0	1	0	0	0	0	0	0	0	0	0	0	0	0	0	0
OTU_13547	d__Bacteria; p__unclassified; c__unclassified; o__unclassified; f__unclassified; g__unclassified; s__unclassified	0	0	0	0	0	0	0	0	0	1	0	0	0	0	0	0	0	0	0	0	0	0	0	0	0	0	0	0	0	0
OTU_13549	d__Bacteria; p__Actinobacteria; c__unclassified; o__Micromonosporales; f__Micromonosporaceae; g__Actinoplanes; s__unclassified	0	0	0	0	0	0	0	0	0	0	0	0	0	0	0	1	0	0	0	0	0	0	0	0	0	0	0	0	0	0
OTU_1355	d__Bacteria; p__Actinobacteria; c__unclassified; o__Streptomycetales; f__Streptomycetaceae; g__unclassified; s__unclassified	0	0	1	0	0	0	0	0	1	0	0	6	0	0	0	0	0	2	0	0	0	0	0	0	4	0	0	1	0	0
OTU_13550	Unassigned	0	0	0	0	0	0	0	0	0	0	0	0	0	0	0	2	0	0	0	0	0	0	0	0	0	0	0	0	0	0
OTU_13553	d__Bacteria; p__Actinobacteria; c__unclassified; o__Streptomycetales; f__Streptomycetaceae; g__unclassified; s__unclassified	0	0	0	0	0	0	0	0	0	0	0	0	2	0	0	0	0	0	0	0	0	0	0	0	0	0	1	0	0	1
OTU_13556	d__Bacteria; p__Actinobacteria; c__unclassified; o__Streptomycetales; f__Streptomycetaceae; g__unclassified; s__unclassified	0	0	0	0	0	0	0	0	0	0	0	0	0	0	0	1	0	0	0	0	0	0	0	0	0	0	0	0	0	0
OTU_13557	d__Bacteria; p__Planctomycetes; c__unclassified; o__unclassified; f__unclassified; g__unclassified; s__unclassified	0	0	0	0	0	0	0	0	0	0	0	0	0	0	0	1	0	0	1	0	0	0	0	0	0	0	0	0	0	0
OTU_13559	Unassigned	0	0	0	0	0	0	0	0	0	0	0	0	0	0	0	0	0	0	0	0	0	0	0	0	0	0	0	0	0	0
OTU_1356	d__Bacteria; p__Actinobacteria; c__unclassified; o__Streptomycetales; f__Streptomycetaceae; g__unclassified; s__unclassified	0	2	2	0	5	1	7	1	0	0	2	9	3	0	0	0	1	0	0	6	0	0	0	0	0	0	1	0	2	0
OTU_13560	Unassigned	0	0	0	0	0	0	0	0	0	0	0	0	0	0	0	2	0	0	0	0	0	0	0	0	0	0	0	0	0	0
OTU_13562	Unassigned	0	0	0	0	0	0	0	0	0	0	0	0	0	0	0	1	0	0	0	0	0	0	0	0	0	0	0	0	0	0
OTU_13563	d__Bacteria; p__Proteobacteria; c__Gammaproteobacteria; o__Pseudomonadales; f__Pseudomonadaceae; g__unclassified; s__unclassified	0	0	0	0	0	0	0	0	0	0	0	0	0	0	0	1	0	0	0	0	0	0	0	0	0	0	0	0	0	0
OTU_13564	d__Bacteria; p__Planctomycetes; c__Planctomycetia; o__Planctomycetales; f__Gemmataceae; g__unclassified; s__unclassified	0	0	0	0	0	0	0	1	0	0	0	0	0	0	0	2	0	0	0	0	0	0	0	0	0	0	0	0	0	1
OTU_13566	Unassigned	0	0	0	0	0	1	0	0	0	0	0	0	0	0	0	2	0	0	0	0	0	0	0	0	0	0	0	0	0	0
OTU_13567	d__Bacteria; p__unclassified; c__unclassified; o__unclassified; f__unclassified; g__unclassified; s__unclassified	0	0	0	0	0	0	0	0	0	0	0	0	0	0	0	0	0	0	0	0	0	0	0	0	0	0	1	0	0	0
OTU_13570	d__Bacteria; p__Actinobacteria; c__unclassified; o__Streptomycetales; f__Streptomycetaceae; g__unclassified; s__unclassified	0	0	0	0	0	0	0	0	0	0	0	0	0	0	0	3	0	0	0	0	0	0	0	0	0	0	0	0	0	0
OTU_13571	d__Bacteria; p__unclassified; c__unclassified; o__unclassified; f__unclassified; g__unclassified; s__unclassified	0	0	0	0	0	0	0	0	0	0	0	0	0	0	0	2	0	0	0	0	0	0	0	0	0	0	0	0	0	0
OTU_13574	d__Bacteria; p__unclassified; c__unclassified; o__unclassified; f__unclassified; g__unclassified; s__unclassified	0	0	0	0	0	0	0	0	0	0	0	0	0	0	0	1	0	0	0	0	0	0	0	0	0	0	0	0	0	0
OTU_13575	d__Bacteria; p__unclassified; c__unclassified; o__unclassified; f__unclassified; g__unclassified; s__unclassified	0	0	0	0	0	0	0	0	0	0	0	0	0	0	0	1	0	0	0	0	0	0	0	0	0	0	0	0	0	0
OTU_13576	d__Bacteria; p__unclassified; c__unclassified; o__unclassified; f__unclassified; g__unclassified; s__unclassified	0	0	0	0	0	0	0	0	0	0	0	0	0	0	0	1	0	0	0	0	0	0	0	0	0	0	0	0	0	0
OTU_1358	d__Bacteria; p__Proteobacteria; c__Alphaproteobacteria; o__Rhizobiales; f__Bradyrhizobiaceae; g__unclassified; s__unclassified	1	0	4	6	0	1	2	3	8	2	10	3	2	12	4	4	2	6	10	8	20	2	2	12	1	6	3	3	4	6
OTU_13581	d__Bacteria; p__Proteobacteria; c__Gammaproteobacteria; o__Xanthomonadales; f__Xanthomonadaceae; g__unclassified; s__unclassified	0	0	0	0	0	0	0	0	0	0	0	0	0	0	0	2	0	0	0	0	0	0	0	0	0	0	0	0	0	0
OTU_13589	Unassigned	0	0	0	0	0	0	0	0	0	0	0	0	0	0	0	2	0	0	0	0	0	0	0	0	0	0	0	0	0	0
OTU_1359	d__Bacteria; p__Proteobacteria; c__unclassified; o__unclassified; f__unclassified; g__unclassified; s__unclassified	0	0	0	0	0	0	0	0	0	0	0	0	0	0	0	0	0	0	0	0	0	0	0	0	0	0	0	0	0	0
OTU_13593	d__Bacteria; p__Proteobacteria; c__unclassified; o__unclassified; f__unclassified; g__unclassified; s__unclassified	0	0	0	0	0	0	0	0	0	0	0	0	0	0	0	1	0	0	0	0	0	0	0	0	0	0	0	0	0	0
OTU_13596	Unassigned	0	0	1	0	0	0	0	0	0	0	0	1	0	0	0	1	0	0	0	0	0	0	0	0	0	0	0	0	0	0
OTU_13597	Unassigned	0	0	0	0	0	0	0	0	0	0	0	0	0	0	0	0	1	0	0	0	0	0	0	0	0	0	0	0	0	0
OTU_13598	d__Bacteria; p__unclassified; c__unclassified; o__unclassified; f__unclassified; g__unclassified; s__unclassified	0	0	0	0	0	0	0	0	0	0	0	0	0	0	0	1	0	0	0	0	0	0	0	0	0	0	0	0	0	0
OTU_13599	d__Bacteria; p__Proteobacteria; c__unclassified; o__unclassified; f__unclassified; g__unclassified; s__unclassified	0	0	0	0	0	0	0	0	0	0	0	0	0	0	0	2	0	0	0	0	0	0	0	0	0	0	0	0	0	0
OTU_136	Unassigned	7	5	54	28	2	2	7	17	14	5	5	44	11	68	113	36	5	42	90	34	96	54	149	73	52	2	18	34	22	72
OTU_1360	d__Bacteria; p__Proteobacteria; c__Alphaproteobacteria; o__Rhizobiales; f__Methylocystaceae; g__unclassified; s__unclassified	2	1	0	0	0	0	3	1	4	0	0	1	2	5	1	0	1	3	10	0	0	0	3	9	1	1	0	4	0	0
OTU_13600	d__Bacteria; p__unclassified; c__unclassified; o__unclassified; f__unclassified; g__unclassified; s__unclassified	0	0	0	0	0	0	0	0	0	0	1	0	0	0	0	0	0	0	0	0	0	0	0	0	0	0	1	0	0	0
OTU_13601	d__Bacteria; p__Proteobacteria; c__Gammaproteobacteria; o__Pseudomonadales; f__Pseudomonadaceae; g__unclassified; s__unclassified	0	0	0	0	0	0	0	0	0	0	0	0	0	0	0	1	0	0	0	2	0	0	0	0	0	0	0	0	0	0
OTU_13606	d__Bacteria; p__Proteobacteria; c__Alphaproteobacteria; o__Rhizobiales; f__Bradyrhizobiaceae; g__unclassified; s__unclassified	0	0	0	0	0	0	0	0	0	0	0	0	0	0	0	1	0	0	0	0	0	0	0	0	0	0	0	0	0	0
OTU_13608	Unassigned	0	0	0	0	0	0	0	0	0	0	0	0	0	0	0	1	0	0	0	0	0	0	0	0	0	0	0	0	0	0
[truncated: 10,417 more rows]
